# Supplementary material
Source: publisher site journal article supplement (https://www.dovepress.com/get_supplementary_file.php?f=474910.xlsx)
Supplement: Supplementary file 1 [file get_supplementary_file.php]

## Sheet: Protein Groups
Table S1. Protein groups
Protein IDs	Gene Name	Fasta headers	Number of proteins	Peptides	Razor + unique peptides	Unique peptides	Sequence coverage [%]	Mol. weight [kDa]	LFQ intensity A1	LFQ intensity A3	LFQ intensity A4	LFQ intensity A5	LFQ intensity A6	LFQ intensity A7	LFQ intensity A9	LFQ intensity A10	LFQ intensity N1	LFQ intensity N2	LFQ intensity N3	LFQ intensity N4	LFQ intensity N6
sp|A0A075B6H7|KV37_HUMAN	IGKV3-7	sp|A0A075B6H7|KV37_HUMAN Probable non-functional immunoglobulin kappa variable 3-7 OS=Homo sapiens OX=9606 GN=IGKV3-7 PE=5 SV=1	1	2	1	1	23.3	12.783	0	15745	0	0	0	0	0	0	0	0	0	0	0
sp|A0A075B6H9|LV469_HUMAN	IGLV4-69	sp|A0A075B6H9|LV469_HUMAN Immunoglobulin lambda variable 4-69 OS=Homo sapiens OX=9606 GN=IGLV4-69 PE=1 SV=1	1	2	2	2	27.7	12.773	0	0	0	0	0	0	284480	0	0	0	0	0	0
sp|A0A075B6I0|LV861_HUMAN	IGLV8-61	sp|A0A075B6I0|LV861_HUMAN Immunoglobulin lambda variable 8-61 OS=Homo sapiens OX=9606 GN=IGLV8-61 PE=3 SV=7	1	2	2	2	14.8	12.814	163630	338470	305310	164580	52518	188880	136050	128320	0	210920	237620	76740	0
sp|A0A075B6J9|LV218_HUMAN	IGLV2-18	sp|A0A075B6J9|LV218_HUMAN Immunoglobulin lambda variable 2-18 OS=Homo sapiens OX=9606 GN=IGLV2-18 PE=3 SV=2	1	3	3	2	24.6	12.412	0	58397	151820	74434	0	0	341720	43068	0	0	57139	0	0
sp|A0A075B6K4|LV310_HUMAN;sp|P01715|LV301_HUMAN	IGLV3-10	sp|A0A075B6K4|LV310_HUMAN Immunoglobulin lambda variable 3-10 OS=Homo sapiens OX=9606 GN=IGLV3-10 PE=3 SV=2	2	5	5	2	35.7	12.441	844050	1411800	983920	174930	0	1437100	1769600	731350	852750	1476700	676350	715170	702050
sp|A0A075B6K5|LV39_HUMAN;sp|A0A075B6K2|LV312_HUMAN	IGLV3-9	sp|A0A075B6K5|LV39_HUMAN Immunoglobulin lambda variable 3-9 OS=Homo sapiens OX=9606 GN=IGLV3-9 PE=3 SV=1	2	3	3	1	30.4	12.332	578810	775690	486750	205090	0	1371400	196520	626110	172450	211690	216790	153290	159420
sp|A0A075B6K6|LV403_HUMAN	IGLV4-3	sp|A0A075B6K6|LV403_HUMAN Immunoglobulin lambda variable 4-3 OS=Homo sapiens OX=9606 GN=IGLV4-3 PE=3 SV=1	1	1	1	1	8.2	13.33	0	0	0	0	0	0	21596	0	0	0	0	0	0
sp|A0A075B6Q5|HV364_HUMAN	IGHV3-64	sp|A0A075B6Q5|HV364_HUMAN Immunoglobulin heavy variable 3-64 OS=Homo sapiens OX=9606 GN=IGHV3-64 PE=3 SV=1	1	2	2	2	18.6	12.891	0	0	0	0	0	0	0	0	0	0	42912	0	0
sp|A0A075B6S5|KV127_HUMAN	IGKV1-27	sp|A0A075B6S5|KV127_HUMAN Immunoglobulin kappa variable 1-27 OS=Homo sapiens OX=9606 GN=IGKV1-27 PE=3 SV=1	1	3	2	2	29.1	12.711	0	18635	0	0	0	0	0	0	0	0	0	0	0
sp|A0A0A0MS14|HV145_HUMAN	IGHV1-45	sp|A0A0A0MS14|HV145_HUMAN Immunoglobulin heavy variable 1-45 OS=Homo sapiens OX=9606 GN=IGHV1-45 PE=3 SV=1	1	1	1	1	9.4	13.508	0	0	0	0	0	0	0	0	0	0	0	0	10625
sp|A0A0A0MS15|HV349_HUMAN;sp|A0A0B4J1V6|HV373_HUMAN	IGHV3-49	sp|A0A0A0MS15|HV349_HUMAN Immunoglobulin heavy variable 3-49 OS=Homo sapiens OX=9606 GN=IGHV3-49 PE=3 SV=1	2	3	3	3	27.7	13.056	0	140580	81480	171350	0	0	76949	217540	0	111690	115080	101870	217060
sp|A0A0A0MT36|KVD21_HUMAN;sp|A0A0C4DH26|KVD41_HUMAN	IGKV6D-21	sp|A0A0A0MT36|KVD21_HUMAN Immunoglobulin kappa variable 6D-21 OS=Homo sapiens OX=9606 GN=IGKV6D-21 PE=3 SV=1	2	3	3	1	28.9	12.34	0	242010	22380	0	0	0	90412	32296	0	0	36102	61453	0
sp|A0A0B4J1V0|HV315_HUMAN	IGHV3-15	sp|A0A0B4J1V0|HV315_HUMAN Immunoglobulin heavy variable 3-15 OS=Homo sapiens OX=9606 GN=IGHV3-15 PE=3 SV=1	1	2	2	2	20.2	12.926	0	181830	172290	102080	0	0	275580	143000	0	203400	136120	57370	0
sp|A0A0B4J1V7|HV781_HUMAN	IGHV7-81	sp|A0A0B4J1V7|HV781_HUMAN Probable non-functional immunoglobulin heavy variable 7-81 OS=Homo sapiens OX=9606 GN=IGHV7-81 PE=5 SV=1	1	1	1	1	9.4	12.917	0	0	0	0	0	0	0	0	0	0	0	0	14899
sp|A0A0B4J1X5|HV374_HUMAN;sp|P01767|HV353_HUMAN;sp|A0A0C4DH42|HV366_HUMAN;sp|P0DP02|HVC33_HUMAN;sp|P01772|HV333_HUMAN	IGHV3-74	sp|A0A0B4J1X5|HV374_HUMAN Immunoglobulin heavy variable 3-74 OS=Homo sapiens OX=9606 GN=IGHV3-74 PE=3 SV=1;sp|P01767|HV353_HUMAN Immunoglobulin heavy variable 3-53 OS=Homo sapiens OX=9606 GN=IGHV3-53 PE=1 SV=2;sp|A0A0C4DH42|HV366_HUMAN Immunoglobulin heavy	5	3	2	1	31.6	12.839	0	268150	282480	177580	0	120870	499810	83934	169180	303020	152000	141960	118570
sp|A0A0B4J1X8|HV343_HUMAN	IGHV3-43	sp|A0A0B4J1X8|HV343_HUMAN Immunoglobulin heavy variable 3-43 OS=Homo sapiens OX=9606 GN=IGHV3-43 PE=3 SV=1	1	2	1	1	18.6	13.077	0	0	0	0	0	0	0	0	0	0	0	0	85761
sp|A0A0B4J1Y9|HV372_HUMAN	IGHV3-72	sp|A0A0B4J1Y9|HV372_HUMAN Immunoglobulin heavy variable 3-72 OS=Homo sapiens OX=9606 GN=IGHV3-72 PE=3 SV=1	1	3	3	3	29.4	13.203	0	336170	259370	337770	0	325290	560560	219880	315360	253710	205660	116920	296050
sp|A0A0C4DH24|KV621_HUMAN	IGKV6-21	sp|A0A0C4DH24|KV621_HUMAN Immunoglobulin kappa variable 6-21 OS=Homo sapiens OX=9606 GN=IGKV6-21 PE=3 SV=1	1	3	1	1	28.9	12.43	0	0	0	0	0	0	0	0	0	0	0	0	12514
sp|A0A0C4DH25|KVD20_HUMAN	IGKV3D-20	sp|A0A0C4DH25|KVD20_HUMAN Immunoglobulin kappa variable 3D-20 OS=Homo sapiens OX=9606 GN=IGKV3D-20 PE=3 SV=1	1	2	1	1	21.6	12.515	0	0	0	0	0	0	0	0	0	0	0	0	269040
sp|A0A0C4DH29|HV103_HUMAN;sp|P0DP01|HV108_HUMAN;sp|A0A0B4J2H0|HV69D_HUMAN	IGHV1-3	sp|A0A0C4DH29|HV103_HUMAN Immunoglobulin heavy variable 1-3 OS=Homo sapiens OX=9606 GN=IGHV1-3 PE=3 SV=1;sp|P0DP01|HV108_HUMAN Immunoglobulin heavy variable 1-8 OS=Homo sapiens OX=9606 GN=IGHV1-8 PE=3 SV=1;sp|A0A0B4J2H0|HV69D_HUMAN Immunoglobulin heavy var	3	2	1	1	22.2	13.008	0	0	0	0	0	0	0	0	0	0	0	13951	0
sp|A0A0C4DH31|HV118_HUMAN	IGHV1-18	sp|A0A0C4DH31|HV118_HUMAN Immunoglobulin heavy variable 1-18 OS=Homo sapiens OX=9606 GN=IGHV1-18 PE=3 SV=1	1	2	2	1	23.9	12.82	0	1205500	600250	200330	0	0	1438100	230520	0	831920	680390	586840	0
sp|A0A0C4DH34|HV428_HUMAN	IGHV4-28	sp|A0A0C4DH34|HV428_HUMAN Immunoglobulin heavy variable 4-28 OS=Homo sapiens OX=9606 GN=IGHV4-28 PE=3 SV=1	1	2	2	2	21.4	13.124	0	246830	155650	0	0	0	212350	155610	0	0	126890	107990	0
sp|A0A0C4DH35|HV335_HUMAN	IGHV3-35	sp|A0A0C4DH35|HV335_HUMAN Probable non-functional immunoglobulin heavy variable 3-35 OS=Homo sapiens OX=9606 GN=IGHV3-35 PE=5 SV=1	1	1	1	1	9.4	12.81	0	0	0	0	0	0	0	0	0	0	0	0	148790
sp|A0A0C4DH36|HV338_HUMAN	IGHV3-38	sp|A0A0C4DH36|HV338_HUMAN Probable non-functional immunoglobulin heavy variable 3-38 OS=Homo sapiens OX=9606 GN=IGHV3-38 PE=5 SV=1	1	1	1	1	9.5	12.758	0	0	0	0	0	0	0	0	0	0	0	41603	0
sp|A0A0C4DH38|HV551_HUMAN;sp|A0A0J9YXX1|HV5X1_HUMAN	IGHV5-51	sp|A0A0C4DH38|HV551_HUMAN Immunoglobulin heavy variable 5-51 OS=Homo sapiens OX=9606 GN=IGHV5-51 PE=3 SV=1;sp|A0A0J9YXX1|HV5X1_HUMAN Immunoglobulin heavy variable 5-10-1 OS=Homo sapiens OX=9606 GN=IGHV5-10-1 PE=3 SV=1	2	3	3	3	33.3	12.674	0	105470	70155	29268	0	0	259920	35974	0	34300	40085	65349	0
sp|A0A0C4DH55|KVD07_HUMAN	IGKV3D-7	sp|A0A0C4DH55|KVD07_HUMAN Immunoglobulin kappa variable 3D-7 OS=Homo sapiens OX=9606 GN=IGKV3D-7 PE=3 SV=5	1	2	1	1	21	13.148	0	0	0	0	0	0	0	0	0	0	0	522.32	0
sp|A0A0C4DH67|KV108_HUMAN;sp|A0A0C4DH69|KV109_HUMAN	IGKV1-8	sp|A0A0C4DH67|KV108_HUMAN Immunoglobulin kappa variable 1-8 OS=Homo sapiens OX=9606 GN=IGKV1-8 PE=3 SV=1;sp|A0A0C4DH69|KV109_HUMAN Immunoglobulin kappa variable 1-9 OS=Homo sapiens OX=9606 GN=IGKV1-9 PE=3 SV=1	2	3	3	2	42.6	12.537	0	67058	72576	68941	0	0	92785	30161	0	0	0	0	0
sp|A0A0C4DH68|KV224_HUMAN;sp|A0A075B6R9|KVD24_HUMAN	IGKV2-24	sp|A0A0C4DH68|KV224_HUMAN Immunoglobulin kappa variable 2-24 OS=Homo sapiens OX=9606 GN=IGKV2-24 PE=3 SV=1;sp|A0A075B6R9|KVD24_HUMAN Probable non-functional immunoglobulin kappa variable 2D-24 OS=Homo sapiens OX=9606 GN=IGKV2D-24 PE=5 SV=1	2	2	2	2	27.5	13.079	0	395870	581200	0	0	0	969350	0	0	0	0	0	0
sp|A0A0C4DH72|KV106_HUMAN;sp|P01611|KVD12_HUMAN;sp|A0A0C4DH73|KV112_HUMAN	IGKV1-6	sp|A0A0C4DH72|KV106_HUMAN Immunoglobulin kappa variable 1-6 OS=Homo sapiens OX=9606 GN=IGKV1-6 PE=3 SV=1	3	3	1	0	23.9	12.697	0	0	0	0	0	0	0	0	0	0	0	11866	0
sp|A0A0J9YX35|HV64D_HUMAN	IGHV3-64D	sp|A0A0J9YX35|HV64D_HUMAN Immunoglobulin heavy variable 3-64D OS=Homo sapiens OX=9606 GN=IGHV3-64D PE=3 SV=1	1	2	2	2	18.8	12.822	0	259430	167420	96002	0	0	275120	99642	0	176460	272730	142810	0
sp|A0M8Q6|IGLC7_HUMAN	IGLC7	sp|A0M8Q6|IGLC7_HUMAN Immunoglobulin lambda constant 7 OS=Homo sapiens OX=9606 GN=IGLC7 PE=1 SV=3	1	4	2	2	50.9	11.253	0	80006	0	37579	0	0	177470	0	0	0	22055	38513	0
sp|A2NJV5|KV229_HUMAN;sp|A0A075B6S2|KVD29_HUMAN;sp|P06310|KV230_HUMAN;sp|A0A0A0MRZ7|KVD26_HUMAN;sp|A0A075B6S6|KVD30_HUMAN	IGKV2-29	sp|A2NJV5|KV229_HUMAN Immunoglobulin kappa variable 2-29 OS=Homo sapiens OX=9606 GN=IGKV2-29 PE=3 SV=2;sp|A0A075B6S2|KVD29_HUMAN Immunoglobulin kappa variable 2D-29 OS=Homo sapiens OX=9606 GN=IGKV2D-29 PE=3 SV=1	5	3	3	2	32.5	13.085	0	3720400	2208500	1735500	1199600	5249700	3111200	3265100	3212500	7414200	2553000	275590	1860900
sp|A6NEC2|PSAL_HUMAN;sp|P55786|PSA_HUMAN	NPEPPSL1	sp|A6NEC2|PSAL_HUMAN Puromycin-sensitive aminopeptidase-like protein OS=Homo sapiens OX=9606 GN=NPEPPSL1 PE=2 SV=3;sp|P55786|PSA_HUMAN Puromycin-sensitive aminopeptidase OS=Homo sapiens OX=9606 GN=NPEPPS PE=1 SV=2	2	1	1	1	3.6	53.747	0	0	0	0	0	0	0	0	0	0	0	9830.6	0
sp|A6NHL2|TBAL3_HUMAN	TUBAL3	sp|A6NHL2|TBAL3_HUMAN Tubulin alpha chain-like 3 OS=Homo sapiens OX=9606 GN=TUBAL3 PE=1 SV=2	1	3	1	1	7.8	49.908	0	0	0	0	0	0	0	0	0	0	0	7232.2	0
sp|A7E2Y1|MYH7B_HUMAN	MYH7B	sp|A7E2Y1|MYH7B_HUMAN Myosin-7B OS=Homo sapiens OX=9606 GN=MYH7B PE=1 SV=4	1	1	1	1	0.6	225.84	0	0	0	0	0	0	0	0	0	125120	0	0	0
sp|E9PAV3|NACAM_HUMAN;sp|Q13765|NACA_HUMAN;sp|Q9BZK3|NACP4_HUMAN	NACA	sp|E9PAV3|NACAM_HUMAN Nascent polypeptide-associated complex subunit alpha, muscle-specific form OS=Homo sapiens OX=9606 GN=NACA PE=1 SV=1;sp|Q13765|NACA_HUMAN Nascent polypeptide-associated complex subunit alpha OS=Homo sapiens OX=9606 GN=NACA PE=1 SV=1	3	3	3	3	2	205.42	0	23147	23245	34130	0	0	15660	0	0	0	21650	38413	0
sp|O00187|MASP2_HUMAN	MASP2	sp|O00187|MASP2_HUMAN Mannan-binding lectin serine protease 2 OS=Homo sapiens OX=9606 GN=MASP2 PE=1 SV=4	1	1	1	1	2.2	75.702	0	0	0	0	0	0	0	0	0	0	0	11356	0
sp|O00231|PSD11_HUMAN	PSMD11	sp|O00231|PSD11_HUMAN 26S proteasome non-ATPase regulatory subunit 11 OS=Homo sapiens OX=9606 GN=PSMD11 PE=1 SV=3	1	4	4	4	11.4	47.463	0	18886	14848	13686	0	0	14059	0	0	0	13250	36405	0
sp|O00233|PSMD9_HUMAN	PSMD9	sp|O00233|PSMD9_HUMAN 26S proteasome non-ATPase regulatory subunit 9 OS=Homo sapiens OX=9606 GN=PSMD9 PE=1 SV=3	1	5	5	5	26.9	24.682	0	70870	0	0	0	0	50887	47850	0	49912	52677	53877	0
sp|O00299|CLIC1_HUMAN	CLIC1	sp|O00299|CLIC1_HUMAN Chloride intracellular channel protein 1 OS=Homo sapiens OX=9606 GN=CLIC1 PE=1 SV=4	1	2	2	2	11.2	26.922	0	0	0	0	0	0	0	0	0	0	0	93208	0
sp|O00303|EIF3F_HUMAN	EIF3F	sp|O00303|EIF3F_HUMAN Eukaryotic translation initiation factor 3 subunit F OS=Homo sapiens OX=9606 GN=EIF3F PE=1 SV=1	1	1	1	1	4.8	37.563	0	0	0	0	0	0	0	0	0	0	0	5518.8	0
sp|O00391|QSOX1_HUMAN	QSOX1	sp|O00391|QSOX1_HUMAN Sulfhydryl oxidase 1 OS=Homo sapiens OX=9606 GN=QSOX1 PE=1 SV=3	1	18	18	18	26.6	82.577	0	2245200	142470	216200	93061	578260	30806	13093	0	0	110280	42498	40180
sp|O00468|AGRIN_HUMAN	AGRN	sp|O00468|AGRIN_HUMAN Agrin OS=Homo sapiens OX=9606 GN=AGRN PE=1 SV=6	1	11	11	11	7.8	217.32	0	213270	0	15043	0	44769	0	0	0	0	25153	3872.8	0
sp|O00487|PSDE_HUMAN	PSMD14	sp|O00487|PSDE_HUMAN 26S proteasome non-ATPase regulatory subunit 14 OS=Homo sapiens OX=9606 GN=PSMD14 PE=1 SV=1	1	1	1	1	4.2	34.577	0	0	0	0	0	0	0	0	0	0	0	17758	0
sp|O00560|SDCB1_HUMAN	SDCBP	sp|O00560|SDCB1_HUMAN Syntenin-1 OS=Homo sapiens OX=9606 GN=SDCBP PE=1 SV=1	1	3	3	3	16.1	32.444	0	58823	22966	33769	0	0	15931	15606	0	0	0	27348	0
sp|O00592|PODXL_HUMAN	PODXL	sp|O00592|PODXL_HUMAN Podocalyxin OS=Homo sapiens OX=9606 GN=PODXL PE=1 SV=2	1	1	1	1	2.2	58.635	0	0	0	0	0	0	0	0	0	0	0	2470.8	0
sp|O14498|ISLR_HUMAN	ISLR	sp|O14498|ISLR_HUMAN Immunoglobulin superfamily containing leucine-rich repeat protein OS=Homo sapiens OX=9606 GN=ISLR PE=2 SV=1	1	5	5	5	15	45.997	0	246640	51708	103350	0	0	68526	59631	0	0	106040	69628	0
sp|O14618|CCS_HUMAN	CCS	sp|O14618|CCS_HUMAN Copper chaperone for superoxide dismutase OS=Homo sapiens OX=9606 GN=CCS PE=1 SV=1	1	3	3	3	10.9	29.04	0	33092	0	50167	0	0	49901	79164	0	0	74725	185520	0
sp|O14745|NHRF1_HUMAN	SLC9A3R1	sp|O14745|NHRF1_HUMAN Na(+)/H(+) exchange regulatory cofactor NHE-RF1 OS=Homo sapiens OX=9606 GN=SLC9A3R1 PE=1 SV=4	1	1	1	1	3.9	38.868	0	0	0	0	0	0	0	0	0	0	0	12410	0
sp|O14773|TPP1_HUMAN	TPP1	sp|O14773|TPP1_HUMAN Tripeptidyl-peptidase 1 OS=Homo sapiens OX=9606 GN=TPP1 PE=1 SV=2	1	1	1	1	2.5	61.247	0	0	0	0	0	0	0	0	0	0	0	9208	0
sp|O14786|NRP1_HUMAN	NRP1	sp|O14786|NRP1_HUMAN Neuropilin-1 OS=Homo sapiens OX=9606 GN=NRP1 PE=1 SV=3	1	2	2	2	2.8	103.13	0	40124	0	0	0	0	0	0	0	0	0	0	0
sp|O14791|APOL1_HUMAN	APOL1	sp|O14791|APOL1_HUMAN Apolipoprotein L1 OS=Homo sapiens OX=9606 GN=APOL1 PE=1 SV=5	1	8	8	8	23.9	43.974	0	152730	405760	178300	0	47544	470580	152640	0	39625	237480	155280	83133
sp|O14818|PSA7_HUMAN;sp|Q8TAA3|PSMA8_HUMAN	PSMA7	sp|O14818|PSA7_HUMAN Proteasome subunit alpha type-7 OS=Homo sapiens OX=9606 GN=PSMA7 PE=1 SV=1;sp|Q8TAA3|PSMA8_HUMAN Proteasome subunit alpha-type 8 OS=Homo sapiens OX=9606 GN=PSMA8 PE=2 SV=3	2	6	6	6	31	27.887	0	164080	206460	167650	0	0	122860	110640	0	157130	163830	305470	0
sp|O14920|IKKB_HUMAN	IKBKB	sp|O14920|IKKB_HUMAN Inhibitor of nuclear factor kappa-B kinase subunit beta OS=Homo sapiens OX=9606 GN=IKBKB PE=1 SV=1	1	1	1	1	1.9	86.563	0	0	0	0	0	0	0	0	0	0	43043	0	0
sp|O14979|HNRDL_HUMAN	HNRNPDL	sp|O14979|HNRDL_HUMAN Heterogeneous nuclear ribonucleoprotein D-like OS=Homo sapiens OX=9606 GN=HNRNPDL PE=1 SV=3	1	1	1	1	3.8	46.437	0	0	0	0	0	0	0	0	0	0	0	8427.2	0
sp|O15067|PUR4_HUMAN	PFAS	sp|O15067|PUR4_HUMAN Phosphoribosylformylglycinamidine synthase OS=Homo sapiens OX=9606 GN=PFAS PE=1 SV=4	1	4	4	4	3.7	144.73	0	13073	30153	19516	0	0	27572	0	0	0	26453	32566	0
sp|O15143|ARC1B_HUMAN	ARPC1B	sp|O15143|ARC1B_HUMAN Actin-related protein 2/3 complex subunit 1B OS=Homo sapiens OX=9606 GN=ARPC1B PE=1 SV=3	1	3	3	3	13.2	40.949	0	20190	0	0	0	0	28256	7027.3	0	16640	18272	37621	0
sp|O15144|ARPC2_HUMAN	ARPC2	sp|O15144|ARPC2_HUMAN Actin-related protein 2/3 complex subunit 2 OS=Homo sapiens OX=9606 GN=ARPC2 PE=1 SV=1	1	4	4	4	15	34.333	0	28348	17155	32772	0	0	37521	21561	0	0	24127	65303	0
sp|O15335|CHAD_HUMAN	CHAD	sp|O15335|CHAD_HUMAN Chondroadherin OS=Homo sapiens OX=9606 GN=CHAD PE=1 SV=2	1	2	2	2	8.4	40.475	0	10740	0	0	0	0	0	0	0	0	0	0	0
sp|O43175|SERA_HUMAN	PHGDH	sp|O43175|SERA_HUMAN D-3-phosphoglycerate dehydrogenase OS=Homo sapiens OX=9606 GN=PHGDH PE=1 SV=4	1	9	9	9	20.5	56.65	0	116860	28292	79196	0	0	49552	68350	0	0	60099	39840	0
sp|O43240|KLK10_HUMAN	KLK10	sp|O43240|KLK10_HUMAN Kallikrein-10 OS=Homo sapiens OX=9606 GN=KLK10 PE=1 SV=3	1	3	3	3	14.1	30.17	0	81529	0	0	0	0	0	0	0	0	0	0	0
sp|O43299|AP5Z1_HUMAN	AP5Z1	sp|O43299|AP5Z1_HUMAN AP-5 complex subunit zeta-1 OS=Homo sapiens OX=9606 GN=AP5Z1 PE=1 SV=2	1	1	1	1	1.1	88.604	0	0	0	0	0	0	0	0	13528000	0	0	0	0
sp|O43396|TXNL1_HUMAN	TXNL1	sp|O43396|TXNL1_HUMAN Thioredoxin-like protein 1 OS=Homo sapiens OX=9606 GN=TXNL1 PE=1 SV=3	1	4	4	4	25.3	32.251	0	25980	33799	0	0	0	21636	22954	0	0	28839	84768	0
sp|O43405|COCH_HUMAN	COCH	sp|O43405|COCH_HUMAN Cochlin OS=Homo sapiens OX=9606 GN=COCH PE=1 SV=1	1	3	3	3	7.1	59.482	0	0	0	0	0	0	0	0	0	0	0	13327	0
sp|O43488|ARK72_HUMAN;sp|Q8NHP1|ARK74_HUMAN	AKR7A2	sp|O43488|ARK72_HUMAN Aflatoxin B1 aldehyde reductase member 2 OS=Homo sapiens OX=9606 GN=AKR7A2 PE=1 SV=3	2	3	3	3	12.5	39.589	0	58374	0	0	0	0	43323	29091	0	0	0	126190	0
sp|O43490|PROM1_HUMAN	PROM1	sp|O43490|PROM1_HUMAN Prominin-1 OS=Homo sapiens OX=9606 GN=PROM1 PE=1 SV=1	1	9	9	9	13.8	97.201	0	587450	71215	102930	0	26474	20426	0	0	0	20415	0	0
sp|O43491|E41L2_HUMAN	EPB41L2	sp|O43491|E41L2_HUMAN Band 4.1-like protein 2 OS=Homo sapiens OX=9606 GN=EPB41L2 PE=1 SV=1	1	4	4	3	5.7	112.59	0	0	8785.6	0	0	0	6485.5	0	0	0	5410.3	41595	0
sp|O43505|B4GA1_HUMAN	B4GAT1	sp|O43505|B4GA1_HUMAN Beta-1,4-glucuronyltransferase 1 OS=Homo sapiens OX=9606 GN=B4GAT1 PE=1 SV=1	1	2	2	2	6.5	47.119	0	19725	0	0	0	0	0	0	0	0	0	0	0
sp|O43598|DNPH1_HUMAN	DNPH1	sp|O43598|DNPH1_HUMAN 2-deoxynucleoside 5-phosphate N-hydrolase 1 OS=Homo sapiens OX=9606 GN=DNPH1 PE=1 SV=1	1	2	2	2	20.1	19.108	0	0	0	0	0	0	0	0	0	0	0	29644	0
sp|O43681|ASNA_HUMAN	ASNA1	sp|O43681|ASNA_HUMAN ATPase ASNA1 OS=Homo sapiens OX=9606 GN=ASNA1 PE=1 SV=2	1	2	2	2	6.3	38.792	0	0	18171	0	0	0	16620	15479	0	0	17177	31028	0
sp|O43707|ACTN4_HUMAN	ACTN4	sp|O43707|ACTN4_HUMAN Alpha-actinin-4 OS=Homo sapiens OX=9606 GN=ACTN4 PE=1 SV=2	1	23	23	13	32.4	104.85	52140	270230	144690	439330	0	82709	261690	218110	0	0	171100	715250	50248
sp|O43827|ANGL7_HUMAN	ANGPTL7	sp|O43827|ANGL7_HUMAN Angiopoietin-related protein 7 OS=Homo sapiens OX=9606 GN=ANGPTL7 PE=1 SV=1	1	2	2	2	6.6	40.018	0	0	0	36188	0	0	0	0	0	0	30272	0	0
sp|O43852|CALU_HUMAN	CALU	sp|O43852|CALU_HUMAN Calumenin OS=Homo sapiens OX=9606 GN=CALU PE=1 SV=2	1	1	1	1	3.2	37.106	0	0	0	0	0	0	0	0	0	0	0	0	5942.9
sp|O43865|SAHH2_HUMAN;sp|Q96HN2|SAHH3_HUMAN	AHCYL1	sp|O43865|SAHH2_HUMAN S-adenosylhomocysteine hydrolase-like protein 1 OS=Homo sapiens OX=9606 GN=AHCYL1 PE=1 SV=2;sp|Q96HN2|SAHH3_HUMAN Adenosylhomocysteinase 3 OS=Homo sapiens OX=9606 GN=AHCYL2 PE=1 SV=1	2	2	2	2	4.5	58.951	0	0	0	27152	0	0	18863	0	0	0	0	47742	0
sp|O43866|CD5L_HUMAN	CD5L	sp|O43866|CD5L_HUMAN CD5 antigen-like OS=Homo sapiens OX=9606 GN=CD5L PE=1 SV=1	1	10	10	10	39.5	38.087	178190	292840	1134800	507150	246190	980820	535730	798210	0	694800	351050	230200	242000
sp|O60234|GMFG_HUMAN;sp|P60983|GMFB_HUMAN	GMFG	sp|O60234|GMFG_HUMAN Glia maturation factor gamma OS=Homo sapiens OX=9606 GN=GMFG PE=1 SV=1;sp|P60983|GMFB_HUMAN Glia maturation factor beta OS=Homo sapiens OX=9606 GN=GMFB PE=1 SV=2	2	2	2	2	15.5	16.801	0	17207	0	0	0	0	0	0	0	0	0	18411	0
sp|O60282|KIF5C_HUMAN;sp|P33176|KINH_HUMAN;sp|Q12840|KIF5A_HUMAN	KIF5C	sp|O60282|KIF5C_HUMAN Kinesin heavy chain isoform 5C OS=Homo sapiens OX=9606 GN=KIF5C PE=1 SV=1;sp|P33176|KINH_HUMAN Kinesin-1 heavy chain OS=Homo sapiens OX=9606 GN=KIF5B PE=1 SV=1;sp|Q12840|KIF5A_HUMAN Kinesin heavy chain isoform 5A OS=Homo sapiens OX=96	3	2	2	2	2.1	109.49	0	0	0	0	0	0	0	1793100	0	0	966650	890110	1117600
sp|O60437|PEPL_HUMAN	PPL	sp|O60437|PEPL_HUMAN Periplakin OS=Homo sapiens OX=9606 GN=PPL PE=1 SV=4	1	6	6	6	3.9	204.74	0	11219	0	60851	0	0	13646	72312	0	0	18365	34977	13911
sp|O60462|NRP2_HUMAN	NRP2	sp|O60462|NRP2_HUMAN Neuropilin-2 OS=Homo sapiens OX=9606 GN=NRP2 PE=1 SV=3	1	9	9	9	11.5	104.83	0	478570	0	0	0	0	0	0	0	0	0	0	0
sp|O60547|GMDS_HUMAN	GMDS	sp|O60547|GMDS_HUMAN GDP-mannose 4,6 dehydratase OS=Homo sapiens OX=9606 GN=GMDS PE=1 SV=1	1	2	2	2	8.3	41.949	0	15679	0	0	0	0	0	0	0	0	0	0	0
sp|O60613|SEP15_HUMAN	SELENOF	sp|O60613|SEP15_HUMAN Selenoprotein F OS=Homo sapiens OX=9606 GN=SELENOF PE=1 SV=4	1	1	1	1	7.3	18.092	0	0	0	0	0	0	0	0	0	0	0	4285.9	0
sp|O60635|TSN1_HUMAN	TSPAN1	sp|O60635|TSN1_HUMAN Tetraspanin-1 OS=Homo sapiens OX=9606 GN=TSPAN1 PE=1 SV=2	1	1	1	1	5.4	26.301	0	26199	0	0	0	0	0	0	0	0	0	0	0
sp|O60664|PLIN3_HUMAN	PLIN3	sp|O60664|PLIN3_HUMAN Perilipin-3 OS=Homo sapiens OX=9606 GN=PLIN3 PE=1 SV=3	1	4	4	4	12.9	47.074	0	23406	19966	36899	0	0	47733	24934	0	0	33144	60532	47864
sp|O60911|CATL2_HUMAN	CTSV	sp|O60911|CATL2_HUMAN Cathepsin L2 OS=Homo sapiens OX=9606 GN=CTSV PE=1 SV=2	1	1	1	1	4.2	37.329	0	9941	0	0	0	0	0	0	0	0	0	0	0
sp|O60941|DTNB_HUMAN	DTNB	sp|O60941|DTNB_HUMAN Dystrobrevin beta OS=Homo sapiens OX=9606 GN=DTNB PE=1 SV=1	1	1	1	1	1.4	71.355	0	0	0	0	0	0	0	0	0	0	0	0	111900
sp|O75083|WDR1_HUMAN	WDR1	sp|O75083|WDR1_HUMAN WD repeat-containing protein 1 OS=Homo sapiens OX=9606 GN=WDR1 PE=1 SV=4	1	5	5	5	12.2	66.193	0	35691	39407	42369	0	0	31173	0	0	0	45070	103050	0
sp|O75223|GGCT_HUMAN	GGCT	sp|O75223|GGCT_HUMAN Gamma-glutamylcyclotransferase OS=Homo sapiens OX=9606 GN=GGCT PE=1 SV=1	1	2	2	2	16	21.007	0	32960	36384	0	0	0	24725	0	0	0	0	49170	0
sp|O75340|PDCD6_HUMAN	PDCD6	sp|O75340|PDCD6_HUMAN Programmed cell death protein 6 OS=Homo sapiens OX=9606 GN=PDCD6 PE=1 SV=1	1	1	1	1	5.8	21.868	0	0	0	0	0	0	0	0	0	0	0	7439.7	0
sp|O75347|TBCA_HUMAN	TBCA	sp|O75347|TBCA_HUMAN Tubulin-specific chaperone A OS=Homo sapiens OX=9606 GN=TBCA PE=1 SV=3	1	3	3	3	26.9	12.855	0	14353	13023	0	0	0	15036	0	0	0	0	37301	0
sp|O75368|SH3L1_HUMAN	SH3BGRL	sp|O75368|SH3L1_HUMAN SH3 domain-binding glutamic acid-rich-like protein OS=Homo sapiens OX=9606 GN=SH3BGRL PE=1 SV=1	1	6	6	6	40.4	12.774	293980	151740	201520	196950	257530	308380	153040	147070	0	257650	180640	321540	269610
sp|O75369|FLNB_HUMAN	FLNB	sp|O75369|FLNB_HUMAN Filamin-B OS=Homo sapiens OX=9606 GN=FLNB PE=1 SV=2	1	28	28	26	15.4	278.16	0	134870	138600	185180	0	0	200120	81954	0	35507	122200	438810	40335
sp|O75610|LFTY1_HUMAN;sp|O00292|LFTY2_HUMAN	LEFTY1	sp|O75610|LFTY1_HUMAN Left-right determination factor 1 OS=Homo sapiens OX=9606 GN=LEFTY1 PE=2 SV=1;sp|O00292|LFTY2_HUMAN Left-right determination factor 2 OS=Homo sapiens OX=9606 GN=LEFTY2 PE=1 SV=2	2	5	5	5	17.2	40.88	0	334040	47005	21165	0	0	0	0	0	0	0	0	0
sp|O75636|FCN3_HUMAN	FCN3	sp|O75636|FCN3_HUMAN Ficolin-3 OS=Homo sapiens OX=9606 GN=FCN3 PE=1 SV=2	1	4	4	4	16.4	32.903	61798	29998	260800	49409	0	83673	211060	187920	0	296590	89060	57950	49234
sp|O75781|PALM_HUMAN	PALM	sp|O75781|PALM_HUMAN Paralemmin-1 OS=Homo sapiens OX=9606 GN=PALM PE=1 SV=2	1	2	2	2	8.5	42.075	0	0	0	0	0	0	0	0	0	0	0	14512	0
sp|O75822|EIF3J_HUMAN	EIF3J	sp|O75822|EIF3J_HUMAN Eukaryotic translation initiation factor 3 subunit J OS=Homo sapiens OX=9606 GN=EIF3J PE=1 SV=2	1	1	1	1	4.3	29.062	0	0	0	0	0	0	0	0	0	0	0	6464.8	0
sp|O75828|CBR3_HUMAN	CBR3	sp|O75828|CBR3_HUMAN Carbonyl reductase [NADPH] 3 OS=Homo sapiens OX=9606 GN=CBR3 PE=1 SV=3	1	4	2	2	17.7	30.85	0	0	0	0	0	0	20092	14198	0	0	0	49967	0
sp|O75829|CNMD_HUMAN	CNMD	sp|O75829|CNMD_HUMAN Leukocyte cell-derived chemotaxin 1 OS=Homo sapiens OX=9606 GN=CNMD PE=1 SV=1	1	1	1	1	3.6	37.102	0	31314	0	0	0	0	0	0	0	0	0	0	0
sp|O75874|IDHC_HUMAN	IDH1	sp|O75874|IDHC_HUMAN Isocitrate dehydrogenase [NADP] cytoplasmic OS=Homo sapiens OX=9606 GN=IDH1 PE=1 SV=2	1	6	6	6	18.1	46.659	54165	98751	78083	184020	181880	92162	87096	57140	0	84707	80315	208640	139700
sp|O75882|ATRN_HUMAN	ATRN	sp|O75882|ATRN_HUMAN Attractin OS=Homo sapiens OX=9606 GN=ATRN PE=1 SV=2	1	15	15	15	15.9	158.54	208360	296430	305470	225280	109830	165240	237010	301510	173400	187630	165820	139080	235040
sp|O75947|ATP5H_HUMAN	ATP5PD	sp|O75947|ATP5H_HUMAN ATP synthase subunit d, mitochondrial OS=Homo sapiens OX=9606 GN=ATP5PD PE=1 SV=3	1	1	1	1	8.7	18.491	0	0	0	0	0	0	0	0	0	0	0	11408	0
sp|O75955|FLOT1_HUMAN	FLOT1	sp|O75955|FLOT1_HUMAN Flotillin-1 OS=Homo sapiens OX=9606 GN=FLOT1 PE=1 SV=3	1	5	5	5	14.8	47.355	0	31791	64332	31235	0	0	31674	0	0	0	60219	35288	0
sp|O76003|GLRX3_HUMAN	GLRX3	sp|O76003|GLRX3_HUMAN Glutaredoxin-3 OS=Homo sapiens OX=9606 GN=GLRX3 PE=1 SV=2	1	3	3	3	10.4	37.432	0	0	0	0	0	0	4452.3	0	0	0	16634	70722	0
sp|O76041|NEBL_HUMAN	NEBL	sp|O76041|NEBL_HUMAN Nebulette OS=Homo sapiens OX=9606 GN=NEBL PE=1 SV=1	1	1	1	1	0.9	116.45	0	0	0	0	0	0	0	0	0	0	433.14	0	0
sp|O76070|SYUG_HUMAN	SNCG	sp|O76070|SYUG_HUMAN Gamma-synuclein OS=Homo sapiens OX=9606 GN=SNCG PE=1 SV=2	1	6	6	6	48.8	13.331	0	41346	0	0	0	0	13948	0	0	0	0	94668	0
sp|O94905|ERLN2_HUMAN;sp|O75477|ERLN1_HUMAN	ERLIN2	sp|O94905|ERLN2_HUMAN Erlin-2 OS=Homo sapiens OX=9606 GN=ERLIN2 PE=1 SV=1;sp|O75477|ERLN1_HUMAN Erlin-1 OS=Homo sapiens OX=9606 GN=ERLIN1 PE=1 SV=2	2	2	2	2	7.1	37.839	0	0	0	0	0	0	0	25266	0	0	15053	29202	0
sp|O95232|LC7L3_HUMAN	LUC7L3	sp|O95232|LC7L3_HUMAN Luc7-like protein 3 OS=Homo sapiens OX=9606 GN=LUC7L3 PE=1 SV=2	1	1	1	1	3.2	51.466	0	0	0	0	0	0	0	0	0	39587	0	0	0
sp|O95336|6PGL_HUMAN	PGLS	sp|O95336|6PGL_HUMAN 6-phosphogluconolactonase OS=Homo sapiens OX=9606 GN=PGLS PE=1 SV=2	1	3	3	3	16.7	27.547	0	73763	46127	0	0	0	63386	0	0	0	41562	136910	0
sp|O95445|APOM_HUMAN	APOM	sp|O95445|APOM_HUMAN Apolipoprotein M OS=Homo sapiens OX=9606 GN=APOM PE=1 SV=2	1	1	1	1	6.9	21.253	0	0	0	0	0	0	30652	0	0	0	0	0	0
sp|O95747|OXSR1_HUMAN	OXSR1	sp|O95747|OXSR1_HUMAN Serine/threonine-protein kinase OSR1 OS=Homo sapiens OX=9606 GN=OXSR1 PE=1 SV=1	1	3	3	3	7.4	58.022	0	32075	9804.5	46141	69585	35424	25265	23617	0	0	20533	41814	0
sp|O95810|CAVN2_HUMAN	CAVIN2	sp|O95810|CAVN2_HUMAN Caveolae-associated protein 2 OS=Homo sapiens OX=9606 GN=CAVIN2 PE=1 SV=3	1	1	1	1	3.3	47.173	0	0	0	0	0	0	4647.4	0	0	0	0	0	0
sp|O95834|EMAL2_HUMAN	EML2	sp|O95834|EMAL2_HUMAN Echinoderm microtubule-associated protein-like 2 OS=Homo sapiens OX=9606 GN=EML2 PE=1 SV=1	1	1	1	1	2.9	70.678	0	0	0	0	0	0	0	0	0	0	0	8414.9	0
sp|O95865|DDAH2_HUMAN	DDAH2	sp|O95865|DDAH2_HUMAN N(G),N(G)-dimethylarginine dimethylaminohydrolase 2 OS=Homo sapiens OX=9606 GN=DDAH2 PE=1 SV=1	1	5	5	5	23.2	29.644	0	80500	47474	110660	137260	129390	91070	76131	0	71411	49783	218620	76451
sp|O95967|FBLN4_HUMAN	EFEMP2	sp|O95967|FBLN4_HUMAN EGF-containing fibulin-like extracellular matrix protein 2 OS=Homo sapiens OX=9606 GN=EFEMP2 PE=1 SV=3	1	6	6	6	16.5	49.405	0	191580	14620	22680	0	26363	11727	17870	0	0	14988	15658	0
sp|P00167|CYB5_HUMAN	CYB5A	sp|P00167|CYB5_HUMAN Cytochrome b5 OS=Homo sapiens OX=9606 GN=CYB5A PE=1 SV=2	1	4	4	4	42.5	15.33	0	29553	50863	23244	0	0	26667	36151	0	0	35603	52866	58737
sp|P00325|ADH1B_HUMAN;sp|P07327|ADH1A_HUMAN;sp|P00326|ADH1G_HUMAN	ADH1B	sp|P00325|ADH1B_HUMAN All-trans-retinol dehydrogenase [NAD(+)] ADH1B OS=Homo sapiens OX=9606 GN=ADH1B PE=1 SV=2;sp|P07327|ADH1A_HUMAN Alcohol dehydrogenase 1A OS=Homo sapiens OX=9606 GN=ADH1A PE=1 SV=2;sp|P00326|ADH1G_HUMAN Alcohol dehydrogenase 1C OS=Homo	3	5	5	5	14.7	39.854	444110	167460	232460	131630	0	265524	557680	210500	0	0	342260	175690	0
sp|P00338|LDHA_HUMAN	LDHA	sp|P00338|LDHA_HUMAN L-lactate dehydrogenase A chain OS=Homo sapiens OX=9606 GN=LDHA PE=1 SV=2	1	9	8	8	27.4	36.688	179600	359000	181560	195170	129360	0	434800	113160	0	101010	332780	502920	100770
sp|P00352|AL1A1_HUMAN;sp|P47895|AL1A3_HUMAN;sp|O94788|AL1A2_HUMAN	ALDH1A1	sp|P00352|AL1A1_HUMAN Retinal dehydrogenase 1 OS=Homo sapiens OX=9606 GN=ALDH1A1 PE=1 SV=2	3	24	24	23	55.5	54.861	711970	2101600	1556500	2706200	523810	276240	951340	742720	205530	314080	1312600	5433000	567560
sp|P00387|NB5R3_HUMAN	CYB5R3	sp|P00387|NB5R3_HUMAN NADH-cytochrome b5 reductase 3 OS=Homo sapiens OX=9606 GN=CYB5R3 PE=1 SV=3	1	2	2	2	7	34.234	0	0	0	0	0	0	17979	0	0	0	0	0	0
sp|P00390|GSHR_HUMAN	GSR	sp|P00390|GSHR_HUMAN Glutathione reductase, mitochondrial OS=Homo sapiens OX=9606 GN=GSR PE=1 SV=2	1	6	6	6	15.9	56.256	80154	68691	100920	131320	0	0	80013	85801	0	132400	91989	216600	0
sp|P00441|SODC_HUMAN	SOD1	sp|P00441|SODC_HUMAN Superoxide dismutase [Cu-Zn] OS=Homo sapiens OX=9606 GN=SOD1 PE=1 SV=2	1	3	3	3	23.4	15.936	1190500	785440	1078600	1050300	367870	849460	1055200	1099800	0	1199800	964280	1574800	468480
sp|P00450|CERU_HUMAN	CP	sp|P00450|CERU_HUMAN Ceruloplasmin OS=Homo sapiens OX=9606 GN=CP PE=1 SV=1	1	31	31	26	29	122.2	6328700	5221300	11168000	6755900	3175500	5910900	7600100	7173300	8217500	4821400	4124100	2341600	6262500
sp|P00488|F13A_HUMAN	F13A1	sp|P00488|F13A_HUMAN Coagulation factor XIII A chain OS=Homo sapiens OX=9606 GN=F13A1 PE=1 SV=4	1	3	3	3	6.1	83.266	0	27710	23684	0	0	0	30636	0	0	0	0	0	0
sp|P00491|PNPH_HUMAN	PNP	sp|P00491|PNPH_HUMAN Purine nucleoside phosphorylase OS=Homo sapiens OX=9606 GN=PNP PE=1 SV=2	1	10	10	10	43.9	32.118	159170	295380	394260	129630	150420	193900	225120	266270	0	920710	373150	625110	188770
sp|P00492|HPRT_HUMAN	HPRT1	sp|P00492|HPRT_HUMAN Hypoxanthine-guanine phosphoribosyltransferase OS=Homo sapiens OX=9606 GN=HPRT1 PE=1 SV=2	1	6	6	6	34.4	24.579	0	112390	122650	72946	0	65486	127320	96679	0	153870	96471	214580	65429
sp|P00505|AATM_HUMAN	GOT2	sp|P00505|AATM_HUMAN Aspartate aminotransferase, mitochondrial OS=Homo sapiens OX=9606 GN=GOT2 PE=1 SV=3	1	3	3	3	7.9	47.517	0	20544	27558	30971	0	0	49042	25360	0	0	33054	71318	0
sp|P00558|PGK1_HUMAN;sp|P07205|PGK2_HUMAN	PGK1	sp|P00558|PGK1_HUMAN Phosphoglycerate kinase 1 OS=Homo sapiens OX=9606 GN=PGK1 PE=1 SV=3	2	17	17	17	51.6	44.614	652290	907010	803590	600670	282110	336100	827590	566170	163900	640580	608250	1310500	158430
sp|P00568|KAD1_HUMAN	AK1	sp|P00568|KAD1_HUMAN Adenylate kinase isoenzyme 1 OS=Homo sapiens OX=9606 GN=AK1 PE=1 SV=3	1	5	5	5	28.9	21.635	0	431410	49376	72196	342980	115530	269830	193260	0	293490	362420	252260	116670
sp|P00734|THRB_HUMAN;CON__P00735	F2	sp|P00734|THRB_HUMAN Prothrombin OS=Homo sapiens OX=9606 GN=F2 PE=1 SV=2	2	24	24	24	48.1	70.036	156820	2921600	1406500	980640	0	226010	1337300	1318400	327730	228590	1041200	1520500	578240
sp|P00736|C1R_HUMAN	C1R	sp|P00736|C1R_HUMAN Complement C1r subcomponent OS=Homo sapiens OX=9606 GN=C1R PE=1 SV=2	1	12	12	12	24.5	80.118	245180	2613200	631780	366300	117530	758990	375030	408670	45002	206220	657190	141460	126030
sp|P00738|HPT_HUMAN	HP	sp|P00738|HPT_HUMAN Haptoglobin OS=Homo sapiens OX=9606 GN=HP PE=1 SV=1	1	27	27	12	56.9	45.205	75379000	1025800	76943000	16806000	21480000	34801000	75268000	67302000	23373000	496160	50525000	15573000	50989000
sp|P00739|HPTR_HUMAN	HPR	sp|P00739|HPTR_HUMAN Haptoglobin-related protein OS=Homo sapiens OX=9606 GN=HPR PE=2 SV=2	1	19	4	4	45.4	39.029	38686	37624	174670	35341	0	73453	374290	171130	0	28834	220640	86659	0
sp|P00740|FA9_HUMAN	F9	sp|P00740|FA9_HUMAN Coagulation factor IX OS=Homo sapiens OX=9606 GN=F9 PE=1 SV=2	1	1	1	1	4.1	51.778	0	0	0	0	0	0	0	0	0	0	0	18915	0
sp|P00742|FA10_HUMAN	F10	sp|P00742|FA10_HUMAN Coagulation factor X OS=Homo sapiens OX=9606 GN=F10 PE=1 SV=2	1	2	2	2	5.5	54.731	0	16724	17596	0	0	0	16190	21483	0	0	0	21443	0
sp|P00746|CFAD_HUMAN	CFD	sp|P00746|CFAD_HUMAN Complement factor D OS=Homo sapiens OX=9606 GN=CFD PE=1 SV=5	1	3	3	3	15.8	27.033	0	74326	0	0	0	0	55006	0	0	0	0	0	0
sp|P00747|PLMN_HUMAN;CON__P06868;sp|Q02325|PLGB_HUMAN	PLG	sp|P00747|PLMN_HUMAN Plasminogen OS=Homo sapiens OX=9606 GN=PLG PE=1 SV=2	3	34	34	33	52.7	90.568	883680	4597400	2903300	1468500	1364300	1829700	3795200	3894100	3022800	2375400	1895100	2329200	1981900
sp|P00748|FA12_HUMAN	F12	sp|P00748|FA12_HUMAN Coagulation factor XII OS=Homo sapiens OX=9606 GN=F12 PE=1 SV=3	1	5	5	5	11.9	67.791	0	132270	77944	41176	0	103790	101320	163470	0	0	45060	66231	0
sp|P00750|TPA_HUMAN	PLAT	sp|P00750|TPA_HUMAN Tissue-type plasminogen activator OS=Homo sapiens OX=9606 GN=PLAT PE=1 SV=1	1	1	1	1	2.8	62.916	0	6561.1	0	0	0	0	0	0	0	0	0	0	0
sp|P00751|CFAB_HUMAN	CFB	sp|P00751|CFAB_HUMAN Complement factor B OS=Homo sapiens OX=9606 GN=CFB PE=1 SV=2	1	26	26	26	31.7	85.532	2573100	5827000	5325800	2914400	970020	3571900	6656700	5108900	3765500	3764900	4448200	2785100	4672900
sp|P00915|CAH1_HUMAN	CA1	sp|P00915|CAH1_HUMAN Carbonic anhydrase 1 OS=Homo sapiens OX=9606 GN=CA1 PE=1 SV=2	1	16	16	16	72	28.87	49272000	22508000	41335000	12960000	20239000	11106000	24313000	26317000	13885000	68159000	30734000	47117000	9514100
sp|P00918|CAH2_HUMAN	CA2	sp|P00918|CAH2_HUMAN Carbonic anhydrase 2 OS=Homo sapiens OX=9606 GN=CA2 PE=1 SV=2	1	12	12	12	52.7	29.246	11351000	3375100	6608100	2931600	3983000	3446000	3206100	5188600	2249600	16502000	6258400	8336900	1708900
sp|P01008|ANT3_HUMAN;CON__P41361	SERPINC1	sp|P01008|ANT3_HUMAN Antithrombin-III OS=Homo sapiens OX=9606 GN=SERPINC1 PE=1 SV=1	2	15	15	15	33.6	52.602	2362400	4895900	6509200	4920600	1310100	1644400	5660100	6093100	5204000	2046400	3246000	3364000	2288900
sp|P01009|A1AT_HUMAN	SERPINA1	sp|P01009|A1AT_HUMAN Alpha-1-antitrypsin OS=Homo sapiens OX=9606 GN=SERPINA1 PE=1 SV=3	1	28	28	28	56.2	46.736	45370000	44557000	64814000	72676000	17473000	19911000	54686000	63301000	42399000	23570000	32623000	26776000	29806000
sp|P01011|AACT_HUMAN	SERPINA3	sp|P01011|AACT_HUMAN Alpha-1-antichymotrypsin OS=Homo sapiens OX=9606 GN=SERPINA3 PE=1 SV=2	1	14	14	14	32.4	47.65	4420900	57192000	8426000	5183600	1549500	7083400	9071900	10376000	8732200	2778300	7820400	3336200	5421700
sp|P01019|ANGT_HUMAN	AGT	sp|P01019|ANGT_HUMAN Angiotensinogen OS=Homo sapiens OX=9606 GN=AGT PE=1 SV=1	1	10	10	10	24.9	53.154	289540	1493900	1240500	672030	0	215450	1996100	995660	398260	353940	909000	911970	410440
sp|P01023|A2MG_HUMAN;CON__ENSEMBL:ENSBTAP00000024146	A2M	sp|P01023|A2MG_HUMAN Alpha-2-macroglobulin OS=Homo sapiens OX=9606 GN=A2M PE=1 SV=3	2	53	53	49	42.1	163.29	32618000	14341000	46897000	33901000	9427300	17536000	32985000	51861000	12323000	40086000	25354000	31368000	9216700
sp|P01024|CO3_HUMAN;CON__Q2UVX4	C3	sp|P01024|CO3_HUMAN Complement C3 OS=Homo sapiens OX=9606 GN=C3 PE=1 SV=2	2	82	82	82	52	187.15	8880900	91021000	42408000	19822000	6067500	21846000	39405000	31486000	14453000	17650000	31372000	20738000	16993000
sp|P01031|CO5_HUMAN;CON__Q1A7A4	C5	sp|P01031|CO5_HUMAN Complement C5 OS=Homo sapiens OX=9606 GN=C5 PE=1 SV=4	2	27	27	27	18.9	188.3	0	707920	1440800	465040	84368	260900	1408600	862870	0	389260	810550	536990	318290
sp|P01033|TIMP1_HUMAN	TIMP1	sp|P01033|TIMP1_HUMAN Metalloproteinase inhibitor 1 OS=Homo sapiens OX=9606 GN=TIMP1 PE=1 SV=1	1	6	6	6	42	23.171	0	1759500	13103	0	0	43263	12276	21756	0	0	27264	7963.6	0
sp|P01034|CYTC_HUMAN	CST3	sp|P01034|CYTC_HUMAN Cystatin-C OS=Homo sapiens OX=9606 GN=CST3 PE=1 SV=1	1	4	4	4	30.8	15.799	0	370920	74621	66227	0	0	320820	55998	1541900	0	665830	221240	0
sp|P01042|KNG1_HUMAN;CON__P01045-1;CON__Q2KJ62;CON__P01044-1	KNG1	sp|P01042|KNG1_HUMAN Kininogen-1 OS=Homo sapiens OX=9606 GN=KNG1 PE=1 SV=2	4	22	22	22	31.8	71.957	2288500	4169100	5396800	5161300	2278600	2973600	6845700	5891900	6243900	1986300	3408900	2750500	5311800
sp|P01591|IGJ_HUMAN	JCHAIN	sp|P01591|IGJ_HUMAN Immunoglobulin J chain OS=Homo sapiens OX=9606 GN=JCHAIN PE=1 SV=4	1	5	5	5	37.1	18.098	617330	1204700	1695500	508970	1339600	1250700	1129000	1123500	200710	1049300	1053000	318850	947240
sp|P01594|KV133_HUMAN;sp|P01593|KVD33_HUMAN	IGKV1-33	sp|P01594|KV133_HUMAN Immunoglobulin kappa variable 1-33 OS=Homo sapiens OX=9606 GN=IGKV1-33 PE=1 SV=2;sp|P01593|KVD33_HUMAN Immunoglobulin kappa variable 1D-33 OS=Homo sapiens OX=9606 GN=IGKV1D-33 PE=1 SV=2	2	1	1	1	13.7	12.848	0	0	0	0	0	0	0	0	0	0	0	44225	0
sp|P01599|KV117_HUMAN	IGKV1-17	sp|P01599|KV117_HUMAN Immunoglobulin kappa variable 1-17 OS=Homo sapiens OX=9606 GN=IGKV1-17 PE=1 SV=2	1	3	3	1	23.1	12.778	147310	143160	254900	130530	0	137250	486830	318790	146910	166930	179010	95330	86015
sp|P01601|KVD16_HUMAN	IGKV1D-16	sp|P01601|KVD16_HUMAN Immunoglobulin kappa variable 1D-16 OS=Homo sapiens OX=9606 GN=IGKV1D-16 PE=3 SV=2	1	1	1	1	13.7	12.73	0	0	0	0	0	0	39552	0	0	0	0	0	0
sp|P01602|KV105_HUMAN	IGKV1-5	sp|P01602|KV105_HUMAN Immunoglobulin kappa variable 1-5 OS=Homo sapiens OX=9606 GN=IGKV1-5 PE=1 SV=2	1	3	2	2	24.8	12.781	0	9624.4	0	0	0	0	0	0	0	0	0	0	0
sp|P01614|KVD40_HUMAN;sp|A0A087WW87|KV240_HUMAN	IGKV2D-40	sp|P01614|KVD40_HUMAN Immunoglobulin kappa variable 2D-40 OS=Homo sapiens OX=9606 GN=IGKV2D-40 PE=1 SV=2;sp|A0A087WW87|KV240_HUMAN Immunoglobulin kappa variable 2-40 OS=Homo sapiens OX=9606 GN=IGKV2-40 PE=3 SV=2	2	2	1	1	22.3	13.31	0	55858	0	0	0	0	0	0	0	0	23855	0	0
sp|P01615|KVD28_HUMAN;sp|A0A075B6P5|KV228_HUMAN	IGKV2D-28	sp|P01615|KVD28_HUMAN Immunoglobulin kappa variable 2D-28 OS=Homo sapiens OX=9606 GN=IGKV2D-28 PE=1 SV=2;sp|A0A075B6P5|KV228_HUMAN Immunoglobulin kappa variable 2-28 OS=Homo sapiens OX=9606 GN=IGKV2-28 PE=3 SV=1	2	2	1	1	23.3	12.957	0	79408	0	0	0	0	36010	0	0	0	0	0	0
sp|P01619|KV320_HUMAN	IGKV3-20	sp|P01619|KV320_HUMAN Immunoglobulin kappa variable 3-20 OS=Homo sapiens OX=9606 GN=IGKV3-20 PE=1 SV=2	1	4	4	3	40.5	12.557	0	2295600	863080	605510	0	0	2625700	769520	0	0	584090	640300	0
sp|P01624|KV315_HUMAN	IGKV3-15	sp|P01624|KV315_HUMAN Immunoglobulin kappa variable 3-15 OS=Homo sapiens OX=9606 GN=IGKV3-15 PE=1 SV=2	1	3	3	0	26.1	12.496	1233700	2116500	959130	528970	0	1558900	2109400	1183400	0	1099800	1074300	709020	0
sp|P01700|LV147_HUMAN;sp|P01699|LV144_HUMAN	IGLV1-47	sp|P01700|LV147_HUMAN Immunoglobulin lambda variable 1-47 OS=Homo sapiens OX=9606 GN=IGLV1-47 PE=1 SV=2;sp|P01699|LV144_HUMAN Immunoglobulin lambda variable 1-44 OS=Homo sapiens OX=9606 GN=IGLV1-44 PE=1 SV=2	2	3	3	3	24.8	12.283	0	734800	595060	183760	0	489920	884830	621520	160990	406600	334320	209490	184820
sp|P01701|LV151_HUMAN	IGLV1-51	sp|P01701|LV151_HUMAN Immunoglobulin lambda variable 1-51 OS=Homo sapiens OX=9606 GN=IGLV1-51 PE=1 SV=2	1	2	2	2	13.7	12.249	562390	1562300	599060	414430	0	2252300	1794600	970190	533600	1067300	797090	339040	585550
sp|P01704|LV214_HUMAN	IGLV2-14	sp|P01704|LV214_HUMAN Immunoglobulin lambda variable 2-14 OS=Homo sapiens OX=9606 GN=IGLV2-14 PE=1 SV=2	1	2	1	1	13.3	12.597	0	0	0	0	0	0	0	0	0	0	0	14786	0
sp|P01714|LV319_HUMAN	IGLV3-19	sp|P01714|LV319_HUMAN Immunoglobulin lambda variable 3-19 OS=Homo sapiens OX=9606 GN=IGLV3-19 PE=1 SV=2	1	3	3	3	27.7	12.042	376270	612120	447730	415120	324280	942510	746550	607390	578710	688970	480060	250230	426550
sp|P01717|LV325_HUMAN	IGLV3-25	sp|P01717|LV325_HUMAN Immunoglobulin lambda variable 3-25 OS=Homo sapiens OX=9606 GN=IGLV3-25 PE=1 SV=2	1	4	3	1	36.6	12.011	231540	209550	223370	264640	283480	434150	439440	473830	351090	443640	203480	181550	376280
sp|P01721|LV657_HUMAN	IGLV6-57	sp|P01721|LV657_HUMAN Immunoglobulin lambda variable 6-57 OS=Homo sapiens OX=9606 GN=IGLV6-57 PE=1 SV=2	1	2	2	2	18.8	12.566	0	75475	62819	0	0	104070	0	0	0	0	0	0	66160
sp|P01742|HV169_HUMAN	IGHV1-69	sp|P01742|HV169_HUMAN Immunoglobulin heavy variable 1-69 OS=Homo sapiens OX=9606 GN=IGHV1-69 PE=1 SV=2	1	2	2	1	20.5	12.659	0	1436300	184090	160560	0	0	307660	988000	0	625180	646080	807110	0
sp|P01743|HV146_HUMAN	IGHV1-46	sp|P01743|HV146_HUMAN Immunoglobulin heavy variable 1-46 OS=Homo sapiens OX=9606 GN=IGHV1-46 PE=1 SV=2	1	2	1	1	22.2	12.933	0	0	0	0	0	0	8313.9	0	0	0	0	0	0
sp|P01766|HV313_HUMAN	IGHV3-13	sp|P01766|HV313_HUMAN Immunoglobulin heavy variable 3-13 OS=Homo sapiens OX=9606 GN=IGHV3-13 PE=1 SV=2	1	2	1	1	19	12.506	0	0	0	0	0	0	0	0	0	0	0	0	50701
sp|P01780|HV307_HUMAN;sp|P01763|HV348_HUMAN;sp|P01762|HV311_HUMAN;sp|A0A0B4J1V1|HV321_HUMAN;sp|A0A0C4DH32|HV320_HUMAN;sp|A0A0J9YVY3|HV741_HUMAN	IGHV3-7	sp|P01780|HV307_HUMAN Immunoglobulin heavy variable 3-7 OS=Homo sapiens OX=9606 GN=IGHV3-7 PE=1 SV=2;sp|P01763|HV348_HUMAN Immunoglobulin heavy variable 3-48 OS=Homo sapiens OX=9606 GN=IGHV3-48 PE=1 SV=2;sp|P01762|HV311_HUMAN Immunoglobulin heavy variable	6	3	2	1	26.5	12.943	0	538710	459480	171960	0	253150	834290	317070	0	197430	253830	242300	0
sp|P01833|PIGR_HUMAN	PIGR	sp|P01833|PIGR_HUMAN Polymeric immunoglobulin receptor OS=Homo sapiens OX=9606 GN=PIGR PE=1 SV=4	1	18	18	18	29.2	83.283	0	4127700	285140	372140	38664	182780	1267400	56843	0	17097	913140	64466	241790
sp|P01834|IGKC_HUMAN	IGKC	sp|P01834|IGKC_HUMAN Immunoglobulin kappa constant OS=Homo sapiens OX=9606 GN=IGKC PE=1 SV=2	1	9	2	2	87.9	11.765	0	43017000	7846800	0	0	0	0	7221500	0	0	0	5069300	0
sp|P01859|IGHG2_HUMAN	IGHG2	sp|P01859|IGHG2_HUMAN Immunoglobulin heavy constant gamma 2 OS=Homo sapiens OX=9606 GN=IGHG2 PE=1 SV=2	1	13	7	6	44.2	35.9	19547000	32800000	9907200	12430000	2650400	13998000	24274000	6860600	10295000	17930000	3363700	6214700	15534000
sp|P01860|IGHG3_HUMAN	IGHG3	sp|P01860|IGHG3_HUMAN Immunoglobulin heavy constant gamma 3 OS=Homo sapiens OX=9606 GN=IGHG3 PE=1 SV=2	1	15	9	6	51.5	41.287	9546800	13012000	11104000	12510000	5195100	23390000	18709000	14801000	8131300	23961000	11714000	8356800	2798400
sp|P01861|IGHG4_HUMAN	IGHG4	sp|P01861|IGHG4_HUMAN Immunoglobulin heavy constant gamma 4 OS=Homo sapiens OX=9606 GN=IGHG4 PE=1 SV=1	1	9	4	4	44	35.94	1275000	5106200	1172500	1408100	1647100	6060700	6678900	3504000	0	2335300	3831800	954840	1259300
sp|P01871|IGHM_HUMAN;sp|P0DOX6|IGM_HUMAN	IGHM	sp|P01871|IGHM_HUMAN Immunoglobulin heavy constant mu OS=Homo sapiens OX=9606 GN=IGHM PE=1 SV=4;sp|P0DOX6|IGM_HUMAN Immunoglobulin mu heavy chain OS=Homo sapiens OX=9606 PE=1 SV=2	2	15	15	15	38	49.439	8320900	7298200	27096000	14304000	6919300	24778000	16704000	20742000	2192600	20747000	9963000	5774200	5500000
sp|P01876|IGHA1_HUMAN	IGHA1	sp|P01876|IGHA1_HUMAN Immunoglobulin heavy constant alpha 1 OS=Homo sapiens OX=9606 GN=IGHA1 PE=1 SV=2	1	9	9	7	32.9	37.654	20214000	13368000	11681000	9962600	7059200	31460000	21497000	18970000	11076000	22260000	20548000	6959900	22280000
sp|P02008|HBAZ_HUMAN	HBZ	sp|P02008|HBAZ_HUMAN Hemoglobin subunit zeta OS=Homo sapiens OX=9606 GN=HBZ PE=1 SV=2	1	4	4	4	36.6	15.637	0	87328	0	0	0	0	41411	0	0	0	34369	203420	0
sp|P02042|HBD_HUMAN	HBD	sp|P02042|HBD_HUMAN Hemoglobin subunit delta OS=Homo sapiens OX=9606 GN=HBD PE=1 SV=2	1	15	7	7	93.2	16.055	33579000	20553000	28069000	13851000	12852000	12893000	26704000	27429000	10189000	65800000	33237000	34416000	13235000
sp|P02100|HBE_HUMAN	HBE1	sp|P02100|HBE_HUMAN Hemoglobin subunit epsilon OS=Homo sapiens OX=9606 GN=HBE1 PE=1 SV=2	1	3	1	1	18.4	16.203	175640	185690	215250	701560	43980	0	465780	300420	0	300630	238450	613290	1359300
sp|P02144|MYG_HUMAN	MB	sp|P02144|MYG_HUMAN Myoglobin OS=Homo sapiens OX=9606 GN=MB PE=1 SV=2	1	4	4	4	39.6	17.184	0	0	405370	524400	0	38833	1249200	61665	0	18801	342150	18260	0
sp|P02452|CO1A1_HUMAN;CON__Q862S4	COL1A1	sp|P02452|CO1A1_HUMAN Collagen alpha-1(I) chain OS=Homo sapiens OX=9606 GN=COL1A1 PE=1 SV=5	2	13	13	13	12.4	138.94	0	423350	2805400	4506400	0	3015100	4419000	1692700	949050	366870	685460	531770	3201400
sp|P02511|CRYAB_HUMAN	CRYAB	sp|P02511|CRYAB_HUMAN Alpha-crystallin B chain OS=Homo sapiens OX=9606 GN=CRYAB PE=1 SV=2	1	6	6	6	36	20.159	0	296340	68863	772920	418620	55307	48781	365970	0	18875	283020	855080	292380
sp|P02545|LMNA_HUMAN	LMNA	sp|P02545|LMNA_HUMAN Prelamin-A/C OS=Homo sapiens OX=9606 GN=LMNA PE=1 SV=1	1	23	23	23	40.2	74.139	165010	488350	487250	394460	851800	354470	932530	1264500	212170	339800	745130	547710	591010
sp|P02549|SPTA1_HUMAN	SPTA1	sp|P02549|SPTA1_HUMAN Spectrin alpha chain, erythrocytic 1 OS=Homo sapiens OX=9606 GN=SPTA1 PE=1 SV=5	1	83	83	83	39.6	280.01	5305300	3498300	6251700	2495200	4800500	1810000	3529800	4313000	1600400	7815200	5287100	6449500	1610800
sp|P02647|APOA1_HUMAN;CON__P15497	APOA1	sp|P02647|APOA1_HUMAN Apolipoprotein A-I OS=Homo sapiens OX=9606 GN=APOA1 PE=1 SV=1	2	20	20	20	63.7	30.777	38390000	23478000	76658000	49583000	21719000	28311000	65353000	62649000	59854000	38343000	33320000	36806000	45861000
sp|P02649|APOE_HUMAN;CON__Q03247	APOE	sp|P02649|APOE_HUMAN Apolipoprotein E OS=Homo sapiens OX=9606 GN=APOE PE=1 SV=1	2	14	14	14	48.9	36.154	1123800	1441700	3032300	1869700	735310	1327800	3436700	1417000	4880900	1185800	2487800	1559100	1502600
sp|P02652|APOA2_HUMAN	APOA2	sp|P02652|APOA2_HUMAN Apolipoprotein A-II OS=Homo sapiens OX=9606 GN=APOA2 PE=1 SV=1	1	4	4	4	21	11.175	2252400	4807700	9380900	7096400	2174100	3402300	10105000	7233900	8405300	5694900	5475600	6098100	8928900
sp|P02654|APOC1_HUMAN	APOC1	sp|P02654|APOC1_HUMAN Apolipoprotein C-I OS=Homo sapiens OX=9606 GN=APOC1 PE=1 SV=1	1	3	3	3	24.1	9.3318	251150	345830	756330	209140	201910	366760	501610	803780	176910	256360	362460	318820	117940
sp|P02655|APOC2_HUMAN	APOC2	sp|P02655|APOC2_HUMAN Apolipoprotein C-II OS=Homo sapiens OX=9606 GN=APOC2 PE=1 SV=1	1	2	2	2	17.8	11.284	0	167230	152530	53123	0	0	82817	151510	81822	0	107950	154890	147850
sp|P02656|APOC3_HUMAN	APOC3	sp|P02656|APOC3_HUMAN Apolipoprotein C-III OS=Homo sapiens OX=9606 GN=APOC3 PE=1 SV=1	1	2	2	2	27.3	10.852	0	229110	356370	96778	0	0	181900	1005900	188270	163010	162180	70072	379390
sp|P02671|FIBA_HUMAN	FGA	sp|P02671|FIBA_HUMAN Fibrinogen alpha chain OS=Homo sapiens OX=9606 GN=FGA PE=1 SV=2	1	24	24	24	41.9	94.972	6573800	9274200	13237000	3482800	5392500	7394000	14533000	11783000	1572900	10310000	11167000	3678900	8737600
sp|P02675|FIBB_HUMAN;CON__P02676	FGB	sp|P02675|FIBB_HUMAN Fibrinogen beta chain OS=Homo sapiens OX=9606 GN=FGB PE=1 SV=2	2	24	24	24	51.9	55.928	8327600	12404000	12747000	3481200	4359200	7750600	16280000	13699000	1621500	8154000	11301000	4727200	7696300
sp|P02679|FIBG_HUMAN	FGG	sp|P02679|FIBG_HUMAN Fibrinogen gamma chain OS=Homo sapiens OX=9606 GN=FGG PE=1 SV=3	1	21	21	21	51.7	51.511	7587500	10507000	10806000	3211800	5228900	8023500	12708000	12846000	2006300	7803800	9179500	4675100	9468400
sp|P02724|GLPA_HUMAN	GYPA	sp|P02724|GLPA_HUMAN Glycophorin-A OS=Homo sapiens OX=9606 GN=GYPA PE=1 SV=2	1	2	2	2	20.7	16.331	0	49765	0	0	0	0	0	0	0	0	0	0	0
sp|P02730|B3AT_HUMAN	SLC4A1	sp|P02730|B3AT_HUMAN Band 3 anion transport protein OS=Homo sapiens OX=9606 GN=SLC4A1 PE=1 SV=3	1	19	19	19	24.9	101.79	2782100	2753000	4432400	2831000	2768000	1639900	2704700	1436900	1610900	5576400	5560600	3195100	1356000
sp|P02743|SAMP_HUMAN	APCS	sp|P02743|SAMP_HUMAN Serum amyloid P-component OS=Homo sapiens OX=9606 GN=APCS PE=1 SV=2	1	6	6	6	30.5	25.387	264100	376170	961890	280570	206420	423260	451270	549980	156810	521630	685120	442740	648210
sp|P02746|C1QB_HUMAN	C1QB	sp|P02746|C1QB_HUMAN Complement C1q subcomponent subunit B OS=Homo sapiens OX=9606 GN=C1QB PE=1 SV=3	1	4	4	4	20.6	26.721	0	134750	395130	133190	0	78070	364560	386570	0	143170	235130	113610	0
sp|P02747|C1QC_HUMAN	C1QC	sp|P02747|C1QC_HUMAN Complement C1q subcomponent subunit C OS=Homo sapiens OX=9606 GN=C1QC PE=1 SV=3	1	5	5	5	25.3	25.773	166220	129230	316930	269340	0	384680	231190	461430	0	66852	285080	127650	130340
sp|P02748|CO9_HUMAN;CON__Q3MHN2	C9	sp|P02748|CO9_HUMAN Complement component C9 OS=Homo sapiens OX=9606 GN=C9 PE=1 SV=2	2	12	12	12	26.1	63.173	192360	1588900	1222900	888760	90105	359700	1180000	836220	422680	294490	769320	491310	771280
sp|P02749|APOH_HUMAN;CON__P17690	APOH	sp|P02749|APOH_HUMAN Beta-2-glycoprotein 1 OS=Homo sapiens OX=9606 GN=APOH PE=1 SV=3	2	12	12	12	35.1	38.298	292630	5038900	917080	929290	995290	1579500	3172800	1929700	559080	1386600	1554700	1298200	874490
sp|P02750|A2GL_HUMAN	LRG1	sp|P02750|A2GL_HUMAN Leucine-rich alpha-2-glycoprotein OS=Homo sapiens OX=9606 GN=LRG1 PE=1 SV=2	1	3	3	3	8.9	38.177	0	313950	768800	585540	0	0	396640	444510	0	0	252610	126640	0
sp|P02751|FINC_HUMAN	FN1	sp|P02751|FINC_HUMAN Fibronectin OS=Homo sapiens OX=9606 GN=FN1 PE=1 SV=5	1	34	34	34	19	272.32	289770	1136500	1186900	487970	501230	1028800	1266800	1212400	766600	659320	1053400	1084300	458700
sp|P02753|RET4_HUMAN	RBP4	sp|P02753|RET4_HUMAN Retinol-binding protein 4 OS=Homo sapiens OX=9606 GN=RBP4 PE=1 SV=3	1	6	6	6	25.9	23.01	0	617840	193080	256930	193730	153880	1019900	686190	725820	133090	512500	278220	411460
sp|P02760|AMBP_HUMAN	AMBP	sp|P02760|AMBP_HUMAN Protein AMBP OS=Homo sapiens OX=9606 GN=AMBP PE=1 SV=1	1	10	10	10	32.7	38.999	1067800	1183200	2415000	1661300	624100	1207800	2619400	2247200	1793000	521990	1582200	1158100	1505700
sp|P02763|A1AG1_HUMAN	ORM1	sp|P02763|A1AG1_HUMAN Alpha-1-acid glycoprotein 1 OS=Homo sapiens OX=9606 GN=ORM1 PE=1 SV=1	1	8	8	5	44.8	23.511	12165000	9021600	24122000	11631000	11402000	4126000	14576000	16483000	28817000	11433000	11336000	7499900	21770000
sp|P02765|FETUA_HUMAN	AHSG	sp|P02765|FETUA_HUMAN Alpha-2-HS-glycoprotein OS=Homo sapiens OX=9606 GN=AHSG PE=1 SV=2	1	6	6	4	21.3	39.34	620750	2287300	1170900	3231100	11609000	1322200	1676000	1940700	4562700	959650	1863600	1601600	2569900
sp|P02766|TTHY_HUMAN	TTR	sp|P02766|TTHY_HUMAN Transthyretin OS=Homo sapiens OX=9606 GN=TTR PE=1 SV=1	1	5	5	5	49	15.887	1569400	1973500	2064900	2219000	656240	1352100	2226300	3000500	3794400	913870	1580900	1454400	984400
sp|P02774|VTDB_HUMAN;CON__Q3MHN5;CON__ENSEMBL:ENSBTAP00000018229	GC	sp|P02774|VTDB_HUMAN Vitamin D-binding protein OS=Homo sapiens OX=9606 GN=GC PE=1 SV=2	3	23	23	23	51.5	52.917	6949500	11612000	15581000	14978000	4296400	7534400	14384000	14880000	14822000	9619800	7446900	7783500	13520000
sp|P02775|CXCL7_HUMAN	PPBP	sp|P02775|CXCL7_HUMAN Platelet basic protein OS=Homo sapiens OX=9606 GN=PPBP PE=1 SV=3	1	4	4	4	26.6	13.894	0	147120	59775	0	0	0	237090	76143	0	52035	90373	72255	0
sp|P02776|PLF4_HUMAN;sp|P10720|PF4V_HUMAN	PF4	sp|P02776|PLF4_HUMAN Platelet factor 4 OS=Homo sapiens OX=9606 GN=PF4 PE=1 SV=2;sp|P10720|PF4V_HUMAN Platelet factor 4 variant OS=Homo sapiens OX=9606 GN=PF4V1 PE=1 SV=1	2	3	3	3	34.7	10.845	0	37464	53379	0	0	0	41332	53248	0	0	0	0	0
sp|P02787|TRFE_HUMAN;CON__Q2HJF0	TF	sp|P02787|TRFE_HUMAN Serotransferrin OS=Homo sapiens OX=9606 GN=TF PE=1 SV=3	2	59	59	57	65.9	77.063	155900000	255090000	147190000	220690000	135180000	294220000	156870000	162310000	164300000	188540000	124280000	82125000	123690000
sp|P02788|TRFL_HUMAN	LTF	sp|P02788|TRFL_HUMAN Lactotransferrin OS=Homo sapiens OX=9606 GN=LTF PE=1 SV=6	1	50	50	48	69.3	78.181	534980	86548000	879810	627550	318370	8355700	4240300	140690	0	559630	6965400	789090	125370
sp|P02790|HEMO_HUMAN	HPX	sp|P02790|HEMO_HUMAN Hemopexin OS=Homo sapiens OX=9606 GN=HPX PE=1 SV=2	1	15	15	15	42	51.676	20110000	10971000	17979000	17453000	9393100	17279000	19437000	20910000	20786000	23253000	11857000	9157000	17827000
sp|P02792|FRIL_HUMAN	FTL	sp|P02792|FRIL_HUMAN Ferritin light chain OS=Homo sapiens OX=9606 GN=FTL PE=1 SV=2	1	8	8	8	40	20.019	0	263180	164100	49968	0	0	850490	48550	0	0	40959	384430	65146
sp|P02794|FRIH_HUMAN	FTH1	sp|P02794|FRIH_HUMAN Ferritin heavy chain OS=Homo sapiens OX=9606 GN=FTH1 PE=1 SV=2	1	8	8	8	50.3	21.225	792620	408720	663100	642010	249530	61855	689890	221860	126670	0	299070	882280	743530
sp|P02810|PRPC_HUMAN	PRH1	sp|P02810|PRPC_HUMAN Salivary acidic proline-rich phosphoprotein 1/2 OS=Homo sapiens OX=9606 GN=PRH1 PE=1 SV=2	1	2	2	2	19.3	17.016	0	0	193930	0	0	0	0	64598	0	0	0	0	0
sp|P03950|ANGI_HUMAN	ANG	sp|P03950|ANGI_HUMAN Angiogenin OS=Homo sapiens OX=9606 GN=ANG PE=1 SV=1	1	3	3	3	17	16.55	0	37708	1375.2	0	0	0	1527.1	0	0	0	0	0	0
sp|P03952|KLKB1_HUMAN;sp|P20718|GRAH_HUMAN	KLKB1	sp|P03952|KLKB1_HUMAN Plasma kallikrein OS=Homo sapiens OX=9606 GN=KLKB1 PE=1 SV=1	2	16	16	16	31.2	71.369	126610	377340	692450	398400	0	275740	565370	610080	177750	445180	375970	306530	409510
sp|P03973|SLPI_HUMAN	SLPI	sp|P03973|SLPI_HUMAN Antileukoproteinase OS=Homo sapiens OX=9606 GN=SLPI PE=1 SV=2	1	8	8	8	40.9	14.326	0	4541300	53420	62763	0	1301200	52811	42639	0	0	237360	0	0
sp|P04003|C4BPA_HUMAN;CON__Q28065	C4BPA	sp|P04003|C4BPA_HUMAN C4b-binding protein alpha chain OS=Homo sapiens OX=9606 GN=C4BPA PE=1 SV=2	2	22	22	22	43.9	67.033	911980	1186900	2752900	549490	1098100	1181100	1675300	2481200	109340	1071900	1355300	767660	1115900
sp|P04004|VTNC_HUMAN;CON__Q3ZBS7	VTN	sp|P04004|VTNC_HUMAN Vitronectin OS=Homo sapiens OX=9606 GN=VTN PE=1 SV=1	2	12	12	12	31.4	54.305	499550	1085000	1116300	1418300	894950	1086100	679670	1175600	660860	603030	1264500	1641400	1716700
sp|P04040|CATA_HUMAN	CAT	sp|P04040|CATA_HUMAN Catalase OS=Homo sapiens OX=9606 GN=CAT PE=1 SV=3	1	23	23	23	47.6	59.755	13213000	5097400	9211400	5365000	9764300	7903800	5277900	6800400	4051900	26560000	8458500	13106000	3743700
sp|P04075|ALDOA_HUMAN	ALDOA	sp|P04075|ALDOA_HUMAN Fructose-bisphosphate aldolase A OS=Homo sapiens OX=9606 GN=ALDOA PE=1 SV=2	1	14	14	14	46.4	39.42	1248100	1050500	1188100	1778000	1159300	1152200	1178500	920040	594570	1869300	1271300	1510200	778680
sp|P04080|CYTB_HUMAN	CSTB	sp|P04080|CYTB_HUMAN Cystatin-B OS=Homo sapiens OX=9606 GN=CSTB PE=1 SV=2	1	4	4	3	70.4	11.139	0	367500	115930	98864	0	0	271450	166820	0	26169	108430	700580	0
sp|P04083|ANXA1_HUMAN	ANXA1	sp|P04083|ANXA1_HUMAN Annexin A1 OS=Homo sapiens OX=9606 GN=ANXA1 PE=1 SV=2	1	8	8	8	27.2	38.714	197190	241600	141550	524530	121030	195010	260870	461860	0	57383	230140	1007800	168700
sp|P04114|APOB_HUMAN;CON__ENSEMBL:ENSBTAP00000032840	APOB	sp|P04114|APOB_HUMAN Apolipoprotein B-100 OS=Homo sapiens OX=9606 GN=APOB PE=1 SV=2	2	126	126	126	31.7	515.6	2055300	5246100	12042000	3951700	189690	2797500	10464000	7771700	310040	2154900	7984300	1952600	2374500
sp|P04156|PRIO_HUMAN	PRNP	sp|P04156|PRIO_HUMAN Major prion protein OS=Homo sapiens OX=9606 GN=PRNP PE=1 SV=1	1	2	2	2	9.5	27.661	0	0	0	0	0	0	13576	0	0	0	68602	37764	0
sp|P04179|SODM_HUMAN	SOD2	sp|P04179|SODM_HUMAN Superoxide dismutase [Mn], mitochondrial OS=Homo sapiens OX=9606 GN=SOD2 PE=1 SV=3	1	2	2	2	13.1	24.75	0	33766	20256	0	0	0	93442	0	0	0	0	0	0
sp|P04180|LCAT_HUMAN	LCAT	sp|P04180|LCAT_HUMAN Phosphatidylcholine-sterol acyltransferase OS=Homo sapiens OX=9606 GN=LCAT PE=1 SV=1	1	2	2	2	5	49.577	0	0	37899	0	0	0	32992	0	0	0	0	0	0
sp|P04196|HRG_HUMAN	HRG	sp|P04196|HRG_HUMAN Histidine-rich glycoprotein OS=Homo sapiens OX=9606 GN=HRG PE=1 SV=1	1	13	13	13	25.5	59.578	372810	1684300	1864900	1472800	332730	1144200	1944800	999720	862520	445500	685890	668690	711030
sp|P04217|A1BG_HUMAN	A1BG	sp|P04217|A1BG_HUMAN Alpha-1B-glycoprotein OS=Homo sapiens OX=9606 GN=A1BG PE=1 SV=4	1	10	10	10	28.5	54.253	2995600	1570200	2770800	2545900	1058700	1798000	3118000	3149800	2737800	1913300	1876800	1192500	1651600
sp|P04271|S100B_HUMAN	S100B	sp|P04271|S100B_HUMAN Protein S100-B OS=Homo sapiens OX=9606 GN=S100B PE=1 SV=2	1	1	1	1	16.3	10.713	0	58314	0	0	0	0	24481	0	0	0	0	42718	0
sp|P04275|VWF_HUMAN	VWF	sp|P04275|VWF_HUMAN von Willebrand factor OS=Homo sapiens OX=9606 GN=VWF PE=1 SV=4	1	4	4	4	2	309.26	0	0	37288	0	0	0	13730	0	0	0	0	7917.6	0
sp|P04278|SHBG_HUMAN	SHBG	sp|P04278|SHBG_HUMAN Sex hormone-binding globulin OS=Homo sapiens OX=9606 GN=SHBG PE=1 SV=2	1	2	2	2	5.2	43.779	0	0	25788	0	0	0	0	78413	0	0	17529	0	0
sp|P04279|SEMG1_HUMAN;sp|Q02383|SEMG2_HUMAN	SEMG1	sp|P04279|SEMG1_HUMAN Semenogelin-1 OS=Homo sapiens OX=9606 GN=SEMG1 PE=1 SV=2	2	3	3	3	9.1	52.13	0	0	0	0	52803	103860	0	0	0	0	0	0	0
sp|P04280|PRP1_HUMAN;sp|P02812|PRB2_HUMAN	PRB1	sp|P04280|PRP1_HUMAN Basic salivary proline-rich protein 1 OS=Homo sapiens OX=9606 GN=PRB1 PE=1 SV=3;sp|P02812|PRB2_HUMAN Basic salivary proline-rich protein 2 OS=Homo sapiens OX=9606 GN=PRB2 PE=1 SV=3	2	3	3	3	49.7	38.561	0	0	253810	0	0	0	0	0	0	0	0	0	0
sp|P04406|G3P_HUMAN	GAPDH	sp|P04406|G3P_HUMAN Glyceraldehyde-3-phosphate dehydrogenase OS=Homo sapiens OX=9606 GN=GAPDH PE=1 SV=3	1	9	9	9	34.3	36.053	1739300	2289300	3001100	2616300	523880	870030	2786100	1722200	385800	3508700	2288100	2532300	672060
sp|P04430|KV116_HUMAN	IGKV1-16	sp|P04430|KV116_HUMAN Immunoglobulin kappa variable 1-16 OS=Homo sapiens OX=9606 GN=IGKV1-16 PE=1 SV=2	1	1	1	1	13.7	12.618	0	0	0	0	0	0	0	0	0	0	0	26096	0
sp|P04432|KVD39_HUMAN;sp|P01597|KV139_HUMAN	IGKV1D-39	sp|P04432|KVD39_HUMAN Immunoglobulin kappa variable 1D-39 OS=Homo sapiens OX=9606 GN=IGKV1D-39 PE=3 SV=2;sp|P01597|KV139_HUMAN Immunoglobulin kappa variable 1-39 OS=Homo sapiens OX=9606 GN=IGKV1-39 PE=1 SV=2	2	3	2	2	29.1	12.737	0	60385	14498	0	0	0	102420	0	0	0	0	0	0
sp|P04433|KV311_HUMAN;sp|A0A0A0MRZ8|KVD11_HUMAN	IGKV3-11	sp|P04433|KV311_HUMAN Immunoglobulin kappa variable 3-11 OS=Homo sapiens OX=9606 GN=IGKV3-11 PE=1 SV=1;sp|A0A0A0MRZ8|KVD11_HUMAN Immunoglobulin kappa variable 3D-11 OS=Homo sapiens OX=9606 GN=IGKV3D-11 PE=3 SV=6	2	3	3	3	26.1	12.575	0	2044600	813770	0	0	0	1786400	379300	0	0	963710	554270	0
sp|P04632|CPNS1_HUMAN	CAPNS1	sp|P04632|CPNS1_HUMAN Calpain small subunit 1 OS=Homo sapiens OX=9606 GN=CAPNS1 PE=1 SV=1	1	3	3	3	14.2	28.315	0	111270	84370	96866	0	0	92323	101650	0	54358	95826	237700	0
sp|P04792|HSPB1_HUMAN	HSPB1	sp|P04792|HSPB1_HUMAN Heat shock protein beta-1 OS=Homo sapiens OX=9606 GN=HSPB1 PE=1 SV=2	1	5	5	5	30.2	22.782	0	247930	95713	283830	0	0	145790	353000	0	0	109180	483880	0
sp|P04899|GNAI2_HUMAN;sp|P63096|GNAI1_HUMAN;sp|P08754|GNAI3_HUMAN;sp|P09471|GNAO_HUMAN;sp|P11488|GNAT1_HUMAN;sp|P19087|GNAT2_HUMAN;sp|A8MTJ3|GNAT3_HUMAN;sp|P38405|GNAL_HUMAN;sp|P63092|GNAS2_HUMAN;sp|Q5JWF2|GNAS1_HUMAN	GNAI2	sp|P04899|GNAI2_HUMAN Guanine nucleotide-binding protein G(i) subunit alpha-2 OS=Homo sapiens OX=9606 GN=GNAI2 PE=1 SV=3;sp|P63096|GNAI1_HUMAN Guanine nucleotide-binding protein G(i) subunit alpha-1 OS=Homo sapiens OX=9606 GN=GNAI1 PE=1 SV=2;sp|P08754|GNAI	10	6	6	6	23.1	40.45	0	43860	48082	0	0	0	28968	0	0	0	50335	101560	0
sp|P05023|AT1A1_HUMAN;sp|P50993|AT1A2_HUMAN;sp|P13637|AT1A3_HUMAN;sp|Q13733|AT1A4_HUMAN;sp|P20648|ATP4A_HUMAN;sp|P54707|AT12A_HUMAN	ATP1A1	sp|P05023|AT1A1_HUMAN Sodium/potassium-transporting ATPase subunit alpha-1 OS=Homo sapiens OX=9606 GN=ATP1A1 PE=1 SV=1;sp|P50993|AT1A2_HUMAN Sodium/potassium-transporting ATPase subunit alpha-2 OS=Homo sapiens OX=9606 GN=ATP1A2 PE=1 SV=1;sp|P13637|AT1A3_HU	6	10	10	10	13.3	112.89	0	79458	57433	150990	0	0	102280	0	0	51347	95693	192610	45251
sp|P05060|SCG1_HUMAN	CHGB	sp|P05060|SCG1_HUMAN Secretogranin-1 OS=Homo sapiens OX=9606 GN=CHGB PE=1 SV=2	1	2	2	2	4.1	78.275	0	0	0	0	0	0	0	0	0	0	34557	0	0
sp|P05062|ALDOB_HUMAN	ALDOB	sp|P05062|ALDOB_HUMAN Fructose-bisphosphate aldolase B OS=Homo sapiens OX=9606 GN=ALDOB PE=1 SV=2	1	4	4	4	14.3	39.473	0	9968.1	0	0	0	11646	0	0	0	0	13821	5061.2	377610
sp|P05067|A4_HUMAN	APP	sp|P05067|A4_HUMAN Amyloid-beta precursor protein OS=Homo sapiens OX=9606 GN=APP PE=1 SV=3	1	2	2	2	3.8	86.942	0	5502	0	0	0	0	0	0	0	0	16888	5341.7	0
sp|P05090|APOD_HUMAN	APOD	sp|P05090|APOD_HUMAN Apolipoprotein D OS=Homo sapiens OX=9606 GN=APOD PE=1 SV=1	1	6	6	6	31.2	21.275	741560	1713600	1903500	5469500	4315900	698890	6980100	2021700	39161000	1380100	2127700	1166500	5348700
sp|P05091|ALDH2_HUMAN	ALDH2	sp|P05091|ALDH2_HUMAN Aldehyde dehydrogenase, mitochondrial OS=Homo sapiens OX=9606 GN=ALDH2 PE=1 SV=2	1	6	5	5	13.3	56.381	0	50967	35293	90389	0	81287	20079	18233	0	221810	228620	155890	144343
sp|P05109|S10A8_HUMAN	S100A8	sp|P05109|S10A8_HUMAN Protein S100-A8 OS=Homo sapiens OX=9606 GN=S100A8 PE=1 SV=1	1	3	3	3	32.3	10.834	158210	262650	494300	361140	240340	429030	446880	510140	223070	903880	212340	1199200	172100
sp|P05114|HMGN1_HUMAN	HMGN1	sp|P05114|HMGN1_HUMAN Non-histone chromosomal protein HMG-14 OS=Homo sapiens OX=9606 GN=HMGN1 PE=1 SV=3	1	1	1	1	13	10.659	0	0	0	0	0	0	0	0	0	0	0	0	16886
sp|P05154|IPSP_HUMAN	SERPINA5	sp|P05154|IPSP_HUMAN Plasma serine protease inhibitor OS=Homo sapiens OX=9606 GN=SERPINA5 PE=1 SV=3	1	10	10	10	26.6	45.674	0	3077400	66409	40658	0	107720	79113	0	0	29198	68300	0	0
sp|P05155|IC1_HUMAN	SERPING1	sp|P05155|IC1_HUMAN Plasma protease C1 inhibitor OS=Homo sapiens OX=9606 GN=SERPING1 PE=1 SV=2	1	12	12	12	25.8	55.154	1458000	6691400	5509800	2479900	263180	1706900	4813800	3586400	3778500	1015600	2888900	2271400	1370200
sp|P05156|CFAI_HUMAN;CON__Q32PI4	CFI	sp|P05156|CFAI_HUMAN Complement factor I OS=Homo sapiens OX=9606 GN=CFI PE=1 SV=2	2	18	18	18	37.6	65.75	597650	3820900	1132800	751620	583330	1657500	1397100	1412800	1063300	1216300	1324500	580540	1180000
sp|P05160|F13B_HUMAN	F13B	sp|P05160|F13B_HUMAN Coagulation factor XIII B chain OS=Homo sapiens OX=9606 GN=F13B PE=1 SV=3	1	4	4	4	8.8	75.51	0	51259	46931	28309	0	0	107930	75195	0	0	29723	31790	0
sp|P05164|PERM_HUMAN	MPO	sp|P05164|PERM_HUMAN Myeloperoxidase OS=Homo sapiens OX=9606 GN=MPO PE=1 SV=1	1	3	3	3	4.7	83.868	0	0	12641	9119.2	0	0	12297	0	0	237160	0	81277	0
sp|P05387|RLA2_HUMAN	RPLP2	sp|P05387|RLA2_HUMAN 60S acidic ribosomal protein P2 OS=Homo sapiens OX=9606 GN=RPLP2 PE=1 SV=1	1	2	2	2	39.1	11.665	0	0	23162	0	0	0	39282	40836	0	0	20706	86994	0
sp|P05455|LA_HUMAN	SSB	sp|P05455|LA_HUMAN Lupus La protein OS=Homo sapiens OX=9606 GN=SSB PE=1 SV=2	1	2	2	2	5.4	46.836	0	25242	17335	35484	0	0	20993	0	0	0	0	51954	0
sp|P05543|THBG_HUMAN;CON__Q9TT36	SERPINA7	sp|P05543|THBG_HUMAN Thyroxine-binding globulin OS=Homo sapiens OX=9606 GN=SERPINA7 PE=1 SV=2	2	7	7	7	21	46.324	364940	286870	208900	467290	0	149270	462550	355750	237390	121220	201830	118870	204110
sp|P05546|HEP2_HUMAN	SERPIND1	sp|P05546|HEP2_HUMAN Heparin cofactor 2 OS=Homo sapiens OX=9606 GN=SERPIND1 PE=1 SV=3	1	7	7	7	16.2	57.07	0	448740	440860	281520	0	148600	593840	492690	174900	76866	379800	280500	182050
sp|P05556|ITB1_HUMAN	ITGB1	sp|P05556|ITB1_HUMAN Integrin beta-1 OS=Homo sapiens OX=9606 GN=ITGB1 PE=1 SV=2	1	1	1	1	2	88.414	0	0	0	0	0	0	0	0	0	0	0	15518	0
sp|P05783|K1C18_HUMAN;CON__P05784;CON__H-INV:HIT000015463	KRT18	sp|P05783|K1C18_HUMAN Keratin, type I cytoskeletal 18 OS=Homo sapiens OX=9606 GN=KRT18 PE=1 SV=2	3	10	9	9	25.1	48.057	0	122980	56777	151390	113880	0	59736	129360	0	0	115180	130710	148360
sp|P05976|MYL1_HUMAN	MYL1	sp|P05976|MYL1_HUMAN Myosin light chain 1/3, skeletal muscle isoform OS=Homo sapiens OX=9606 GN=MYL1 PE=1 SV=3	1	2	2	2	18.6	21.145	0	0	0	78669	0	0	41909	0	0	0	0	0	0
sp|P06132|DCUP_HUMAN	UROD	sp|P06132|DCUP_HUMAN Uroporphyrinogen decarboxylase OS=Homo sapiens OX=9606 GN=UROD PE=1 SV=2	1	3	3	3	10.9	40.786	0	0	32001	0	0	0	10691	0	0	0	25928	0	0
sp|P06276|CHLE_HUMAN	BCHE	sp|P06276|CHLE_HUMAN Cholinesterase OS=Homo sapiens OX=9606 GN=BCHE PE=1 SV=1	1	2	2	2	3.5	68.417	0	0	41024	0	0	0	0	0	0	0	0	0	0
sp|P06312|KV401_HUMAN	IGKV4-1	sp|P06312|KV401_HUMAN Immunoglobulin kappa variable 4-1 OS=Homo sapiens OX=9606 GN=IGKV4-1 PE=1 SV=1	1	4	4	4	29.8	13.38	957420	1415200	643030	420490	292150	1102100	1026800	671000	806850	643050	522200	411760	485710
sp|P06331|HV434_HUMAN;sp|P01825|HV459_HUMAN;sp|P0DP08|HVD82_HUMAN;sp|P0DP06|HVD34_HUMAN;sp|A0A0C4DH41|HV461_HUMAN;sp|P01824|HV439_HUMAN;sp|A0A075B6R2|HV404_HUMAN;sp|P0DP07|HV431_HUMAN;sp|A0A087WSY4|HV432_HUMAN	IGHV4-34	sp|P06331|HV434_HUMAN Immunoglobulin heavy variable 4-34 OS=Homo sapiens OX=9606 GN=IGHV4-34 PE=1 SV=2;sp|P01825|HV459_HUMAN Immunoglobulin heavy variable 4-59 OS=Homo sapiens OX=9606 GN=IGHV4-59 PE=1 SV=2;sp|P0DP08|HVD82_HUMAN Immunoglobulin heavy variabl	9	3	3	3	37.4	13.815	356750	1419400	893700	413480	0	370080	1747700	1127600	0	448430	784710	771910	0
sp|P06454|PTMA_HUMAN	PTMA	sp|P06454|PTMA_HUMAN Prothymosin alpha OS=Homo sapiens OX=9606 GN=PTMA PE=1 SV=2	1	3	3	3	25.2	12.203	0	138440	93294	185540	529700	160480	95184	96928	0	58117	115690	237320	379170
sp|P06576|ATPB_HUMAN	ATP5F1B	sp|P06576|ATPB_HUMAN ATP synthase subunit beta, mitochondrial OS=Homo sapiens OX=9606 GN=ATP5F1B PE=1 SV=3	1	11	11	11	28.7	56.559	86111	97264	82445	214700	0	69426	140380	208400	0	63107	143890	231450	127370
sp|P06681|CO2_HUMAN	C2	sp|P06681|CO2_HUMAN Complement C2 OS=Homo sapiens OX=9606 GN=C2 PE=1 SV=2	1	14	14	14	22.1	83.267	0	418520	385710	85343	0	74403	397190	179640	78530	44029	161980	121330	87941
sp|P06702|S10A9_HUMAN	S100A9	sp|P06702|S10A9_HUMAN Protein S100-A9 OS=Homo sapiens OX=9606 GN=S100A9 PE=1 SV=1	1	5	5	5	51.8	13.242	530330	384690	549670	527470	754690	593810	499030	590170	395480	1060300	251100	1113300	509420
sp|P06703|S10A6_HUMAN	S100A6	sp|P06703|S10A6_HUMAN Protein S100-A6 OS=Homo sapiens OX=9606 GN=S100A6 PE=1 SV=1	1	1	1	1	8.9	10.18	0	0	0	0	0	0	0	0	0	0	0	0	473950
sp|P06727|APOA4_HUMAN;CON__Q32PJ2	APOA4	sp|P06727|APOA4_HUMAN Apolipoprotein A-IV OS=Homo sapiens OX=9606 GN=APOA4 PE=1 SV=3	2	28	28	28	64.4	45.398	926610	1973700	3701500	5359800	2056100	2344400	5708100	8205200	6065700	1319700	3707600	2386400	4950800
sp|P06730|IF4E_HUMAN	EIF4E	sp|P06730|IF4E_HUMAN Eukaryotic translation initiation factor 4E OS=Homo sapiens OX=9606 GN=EIF4E PE=1 SV=2	1	1	1	1	6.5	25.097	0	0	0	0	0	0	0	0	0	0	0	13435	0
sp|P06732|KCRM_HUMAN	CKM	sp|P06732|KCRM_HUMAN Creatine kinase M-type OS=Homo sapiens OX=9606 GN=CKM PE=1 SV=2	1	6	6	6	21	43.101	0	0	204450	632800	0	0	626110	0	0	0	269320	22259	0
sp|P06733|ENOA_HUMAN	ENO1	sp|P06733|ENOA_HUMAN Alpha-enolase OS=Homo sapiens OX=9606 GN=ENO1 PE=1 SV=2	1	13	13	12	33.6	47.168	1167400	994350	903530	1583500	937290	691170	929800	839320	357110	1051400	767970	2494100	800610
sp|P06748|NPM_HUMAN	NPM1	sp|P06748|NPM_HUMAN Nucleophosmin OS=Homo sapiens OX=9606 GN=NPM1 PE=1 SV=2	1	1	1	1	4.4	32.575	0	43443	0	72848	115920	0	0	57336	0	0	45797	77996	97137
sp|P06753|TPM3_HUMAN	TPM3	sp|P06753|TPM3_HUMAN Tropomyosin alpha-3 chain OS=Homo sapiens OX=9606 GN=TPM3 PE=1 SV=2	1	9	6	4	28.1	32.95	268750	165040	338560	308860	383360	255790	377400	279590	0	315760	246770	418610	652160
sp|P07099|HYEP_HUMAN	EPHX1	sp|P07099|HYEP_HUMAN Epoxide hydrolase 1 OS=Homo sapiens OX=9606 GN=EPHX1 PE=1 SV=1	1	1	1	1	3.1	52.948	0	0	0	0	0	0	0	0	0	0	0	10783	0
sp|P07108|ACBP_HUMAN	DBI	sp|P07108|ACBP_HUMAN Acyl-CoA-binding protein OS=Homo sapiens OX=9606 GN=DBI PE=1 SV=2	1	2	2	2	41.4	10.044	0	37454	31526	0	0	0	90421	43185	0	0	24221	142700	0
sp|P07195|LDHB_HUMAN;sp|Q6ZMR3|LDH6A_HUMAN;sp|P07864|LDHC_HUMAN	LDHB	sp|P07195|LDHB_HUMAN L-lactate dehydrogenase B chain OS=Homo sapiens OX=9606 GN=LDHB PE=1 SV=2	3	10	10	9	34.7	36.638	1091400	1282000	1634200	1642800	417960	398420	1328900	961390	511810	1076500	1443100	2552400	556630
sp|P07203|GPX1_HUMAN	GPX1	sp|P07203|GPX1_HUMAN Glutathione peroxidase 1 OS=Homo sapiens OX=9606 GN=GPX1 PE=1 SV=4	1	5	5	5	25.1	22.088	0	109740	141580	106450	0	43657	85302	76392	0	170540	126890	151890	106660
sp|P07225|PROS_HUMAN	PROS1	sp|P07225|PROS_HUMAN Vitamin K-dependent protein S OS=Homo sapiens OX=9606 GN=PROS1 PE=1 SV=1	1	10	10	10	18.5	75.122	0	313080	66462	49779	0	0	88119	178550	105190	146650	100560	128890	28355
sp|P07237|PDIA1_HUMAN	P4HB	sp|P07237|PDIA1_HUMAN Protein disulfide-isomerase OS=Homo sapiens OX=9606 GN=P4HB PE=1 SV=3	1	7	7	7	12.6	57.116	0	48891	39091	44729	0	0	54532	49388	0	0	41545	114520	0
sp|P07333|CSF1R_HUMAN	CSF1R	sp|P07333|CSF1R_HUMAN Macrophage colony-stimulating factor 1 receptor OS=Homo sapiens OX=9606 GN=CSF1R PE=1 SV=2	1	1	1	1	1.6	107.98	0	0	0	0	0	0	10196	0	0	0	0	0	0
sp|P07339|CATD_HUMAN	CTSD	sp|P07339|CATD_HUMAN Cathepsin D OS=Homo sapiens OX=9606 GN=CTSD PE=1 SV=1	1	5	5	5	16	44.552	0	87874	0	79338	0	0	65575	121680	0	0	93434	60909	0
sp|P07355|ANXA2_HUMAN;sp|A6NMY6|AXA2L_HUMAN	ANXA2	sp|P07355|ANXA2_HUMAN Annexin A2 OS=Homo sapiens OX=9606 GN=ANXA2 PE=1 SV=2;sp|A6NMY6|AXA2L_HUMAN Putative annexin A2-like protein OS=Homo sapiens OX=9606 GN=ANXA2P2 PE=5 SV=2	2	16	16	16	49.9	38.604	1862500	1080500	730320	1896200	1043000	1941200	1018400	1462500	491310	572630	1217000	2300900	1336100
sp|P07357|CO8A_HUMAN	C8A	sp|P07357|CO8A_HUMAN Complement component C8 alpha chain OS=Homo sapiens OX=9606 GN=C8A PE=1 SV=2	1	11	11	11	27.4	65.163	127410	1086300	433530	325110	189910	424280	500470	402210	249280	278520	431010	263000	305310
sp|P07358|CO8B_HUMAN	C8B	sp|P07358|CO8B_HUMAN Complement component C8 beta chain OS=Homo sapiens OX=9606 GN=C8B PE=1 SV=3	1	11	11	11	24.5	67.046	61222	824010	339580	205480	0	231480	372590	232760	70396	139690	227530	227080	149020
sp|P07359|GP1BA_HUMAN	GP1BA	sp|P07359|GP1BA_HUMAN Platelet glycoprotein Ib alpha chain OS=Homo sapiens OX=9606 GN=GP1BA PE=1 SV=2	1	2	2	2	3.5	71.539	0	0	10121	0	0	0	11644	0	0	0	0	0	0
sp|P07360|CO8G_HUMAN	C8G	sp|P07360|CO8G_HUMAN Complement component C8 gamma chain OS=Homo sapiens OX=9606 GN=C8G PE=1 SV=3	1	8	8	8	54.5	22.277	0	859240	207040	50885	0	45435	162330	58881	19181	36187	77332	187290	35996
sp|P07384|CAN1_HUMAN	CAPN1	sp|P07384|CAN1_HUMAN Calpain-1 catalytic subunit OS=Homo sapiens OX=9606 GN=CAPN1 PE=1 SV=1	1	7	7	7	10.6	81.889	0	112290	78509	82853	0	0	138040	75305	0	0	94358	209080	0
sp|P07437|TBB5_HUMAN;sp|Q9BVA1|TBB2B_HUMAN;sp|Q13509|TBB3_HUMAN;sp|A6NNZ2|TBB8B_HUMAN;sp|Q9BUF5|TBB6_HUMAN;sp|Q9H4B7|TBB1_HUMAN;CON__ENSEMBL:ENSBTAP00000025008	TUBB	sp|P07437|TBB5_HUMAN Tubulin beta chain OS=Homo sapiens OX=9606 GN=TUBB PE=1 SV=2;sp|Q9BVA1|TBB2B_HUMAN Tubulin beta-2B chain OS=Homo sapiens OX=9606 GN=TUBB2B PE=1 SV=1;sp|Q13509|TBB3_HUMAN Tubulin beta-3 chain OS=Homo sapiens OX=9606 GN=TUBB3 PE=1 SV=2	7	11	2	1	28.4	49.67	0	129970	0	0	0	0	67248	0	0	0	59364	59617	0
sp|P07451|CAH3_HUMAN	CA3	sp|P07451|CAH3_HUMAN Carbonic anhydrase 3 OS=Homo sapiens OX=9606 GN=CA3 PE=1 SV=3	1	5	5	5	24.2	29.557	284220	178110	493840	161230	0	145210	341190	222790	192690	260840	182930	500450	205080
sp|P07585|PGS2_HUMAN	DCN	sp|P07585|PGS2_HUMAN Decorin OS=Homo sapiens OX=9606 GN=DCN PE=1 SV=1	1	9	9	8	28.1	39.746	0	697790	954450	1646400	1597300	1779300	825790	321690	0	0	1109100	873740	3185700
sp|P07602|SAP_HUMAN	PSAP	sp|P07602|SAP_HUMAN Prosaposin OS=Homo sapiens OX=9606 GN=PSAP PE=1 SV=2	1	3	3	3	5.7	58.112	0	87996	116490	152460	0	0	142030	161790	0	0	170830	269850	168340
sp|P07686|HEXB_HUMAN	HEXB	sp|P07686|HEXB_HUMAN Beta-hexosaminidase subunit beta OS=Homo sapiens OX=9606 GN=HEXB PE=1 SV=3	1	4	4	4	9.5	63.111	0	47462	0	24179	0	0	0	0	0	0	0	23019	0
sp|P07737|PROF1_HUMAN;CON__P02584	PFN1	sp|P07737|PROF1_HUMAN Profilin-1 OS=Homo sapiens OX=9606 GN=PFN1 PE=1 SV=2	2	5	5	5	43.6	15.054	148770	224300	42352	76786	152020	90248	216440	147140	0	158810	127230	498880	176780
sp|P07738|PMGE_HUMAN	BPGM	sp|P07738|PMGE_HUMAN Bisphosphoglycerate mutase OS=Homo sapiens OX=9606 GN=BPGM PE=1 SV=2	1	10	10	10	47.9	30.005	703770	567320	1201500	414720	430300	281930	779770	670340	148660	1479400	814630	1637500	239200
sp|P07858|CATB_HUMAN	CTSB	sp|P07858|CATB_HUMAN Cathepsin B OS=Homo sapiens OX=9606 GN=CTSB PE=1 SV=3	1	6	6	6	24.5	37.821	0	260610	69317	96043	53356	0	80695	74135	0	30516	46862	46447	47109
sp|P07900|HS90A_HUMAN;sp|Q14568|HS902_HUMAN;sp|Q58FG0|HS905_HUMAN	HSP90AA1	sp|P07900|HS90A_HUMAN Heat shock protein HSP 90-alpha OS=Homo sapiens OX=9606 GN=HSP90AA1 PE=1 SV=5	3	17	17	9	25.3	84.659	474530	479390	478800	1146300	1077900	623270	545320	451950	261110	290980	631630	1672200	874830
sp|P07951|TPM2_HUMAN	TPM2	sp|P07951|TPM2_HUMAN Tropomyosin beta chain OS=Homo sapiens OX=9606 GN=TPM2 PE=1 SV=1	1	8	1	0	22.9	32.85	0	0	0	0	0	0	0	0	0	0	0	0	77772
sp|P07954|FUMH_HUMAN	FH	sp|P07954|FUMH_HUMAN Fumarate hydratase, mitochondrial OS=Homo sapiens OX=9606 GN=FH PE=1 SV=3	1	3	3	3	9.2	54.636	0	0	20975	0	0	0	27538	0	0	0	22851	68083	0
sp|P07998|RNAS1_HUMAN	RNASE1	sp|P07998|RNAS1_HUMAN Ribonuclease pancreatic OS=Homo sapiens OX=9606 GN=RNASE1 PE=1 SV=4	1	3	3	3	35.3	17.644	0	316840	18194	19127	0	0	17470	0	0	0	0	0	0
sp|P08123|CO1A2_HUMAN	COL1A2	sp|P08123|CO1A2_HUMAN Collagen alpha-2(I) chain OS=Homo sapiens OX=9606 GN=COL1A2 PE=1 SV=7	1	11	11	10	10.5	129.31	1251000	947510	3943100	7486800	437540	8911800	8313100	2898600	2863800	607470	1607400	615980	7203600
sp|P08133|ANXA6_HUMAN	ANXA6	sp|P08133|ANXA6_HUMAN Annexin A6 OS=Homo sapiens OX=9606 GN=ANXA6 PE=1 SV=3	1	15	15	15	24.8	75.872	43240	139420	84651	129430	0	203840	132990	118550	0	0	165030	474690	62539
sp|P08185|CBG_HUMAN	SERPINA6	sp|P08185|CBG_HUMAN Corticosteroid-binding globulin OS=Homo sapiens OX=9606 GN=SERPINA6 PE=1 SV=1	1	5	5	5	14.1	45.14	397870	120700	416320	294780	0	142940	257250	431820	421150	219950	227350	105760	220800
sp|P08237|PFKAM_HUMAN	PFKM	sp|P08237|PFKAM_HUMAN ATP-dependent 6-phosphofructokinase, muscle type OS=Homo sapiens OX=9606 GN=PFKM PE=1 SV=2	1	2	2	2	4	85.182	0	5526.4	0	0	0	0	0	0	0	0	0	15224	0
sp|P08238|HS90B_HUMAN;sp|Q58FF7|H90B3_HUMAN;sp|Q58FF8|H90B2_HUMAN	HSP90AB1	sp|P08238|HS90B_HUMAN Heat shock protein HSP 90-beta OS=Homo sapiens OX=9606 GN=HSP90AB1 PE=1 SV=4	3	17	9	8	26.9	83.263	0	211820	159160	156170	180830	159240	135960	92868	0	52940	209410	418750	139640
sp|P08253|MMP2_HUMAN	MMP2	sp|P08253|MMP2_HUMAN 72 kDa type IV collagenase OS=Homo sapiens OX=9606 GN=MMP2 PE=1 SV=2	1	8	8	8	16.2	73.881	0	167450	0	0	0	0	0	0	0	0	0	0	0
sp|P08294|SODE_HUMAN	SOD3	sp|P08294|SODE_HUMAN Extracellular superoxide dismutase [Cu-Zn] OS=Homo sapiens OX=9606 GN=SOD3 PE=1 SV=2	1	7	7	7	37.1	25.851	109740	669150	102280	167590	0	230840	105670	125480	0	0	125030	95413	152410
sp|P08397|HEM3_HUMAN	HMBS	sp|P08397|HEM3_HUMAN Porphobilinogen deaminase OS=Homo sapiens OX=9606 GN=HMBS PE=1 SV=2	1	3	3	3	11.1	39.33	0	45445	16879	13757	0	0	40543	27903	0	28858	26803	74428	0
sp|P08519|APOA_HUMAN	LPA	sp|P08519|APOA_HUMAN Apolipoprotein(a) OS=Homo sapiens OX=9606 GN=LPA PE=1 SV=1	1	2	1	1	8.6	501.31	0	0	0	0	0	0	0	0	0	0	0	0	101410
sp|P08571|CD14_HUMAN	CD14	sp|P08571|CD14_HUMAN Monocyte differentiation antigen CD14 OS=Homo sapiens OX=9606 GN=CD14 PE=1 SV=2	1	4	4	4	17.1	40.076	0	160410	36511	35415	0	0	59099	40175	0	0	43619	35993	0
sp|P08603|CFAH_HUMAN	CFH	sp|P08603|CFAH_HUMAN Complement factor H OS=Homo sapiens OX=9606 GN=CFH PE=1 SV=4	1	41	41	37	41.8	139.09	1978200	3357600	4517700	2474900	2253100	2964300	6018800	5277200	2594200	3103400	3544300	1793200	3389500
sp|P08637|FCG3A_HUMAN;sp|O75015|FCG3B_HUMAN	FCGR3A	sp|P08637|FCG3A_HUMAN Low affinity immunoglobulin gamma Fc region receptor III-A OS=Homo sapiens OX=9606 GN=FCGR3A PE=1 SV=2	2	3	3	3	13.8	29.089	0	49055	0	0	0	0	0	0	0	0	0	0	0
sp|P08670|VIME_HUMAN;sp|P17661|DESM_HUMAN;sp|P41219|PERI_HUMAN;sp|Q16352|AINX_HUMAN;sp|P07196|NFL_HUMAN;sp|P07197|NFM_HUMAN	VIM	sp|P08670|VIME_HUMAN Vimentin OS=Homo sapiens OX=9606 GN=VIM PE=1 SV=4	6	34	34	30	61.8	53.651	10066000	7571400	8747300	30768000	25350000	10923000	7430300	13618000	5850500	1693900	13738000	19427000	17404000
sp|P08697|A2AP_HUMAN;CON__P28800	SERPINF2	sp|P08697|A2AP_HUMAN Alpha-2-antiplasmin OS=Homo sapiens OX=9606 GN=SERPINF2 PE=1 SV=3	2	9	9	9	24	54.565	0	914550	1014400	1162400	257400	433180	1177800	903300	819530	487890	717280	703950	835410
sp|P08758|ANXA5_HUMAN	ANXA5	sp|P08758|ANXA5_HUMAN Annexin A5 OS=Homo sapiens OX=9606 GN=ANXA5 PE=1 SV=2	1	6	6	6	17.8	35.936	300690	254180	179860	518270	164490	184460	357270	578120	137940	0	356210	772900	160610
sp|P08865|RSSA_HUMAN	RPSA	sp|P08865|RSSA_HUMAN 40S ribosomal protein SA OS=Homo sapiens OX=9606 GN=RPSA PE=1 SV=4	1	2	2	2	10.2	32.854	0	28341	0	0	0	0	0	0	0	0	0	0	0
sp|P08962|CD63_HUMAN	CD63	sp|P08962|CD63_HUMAN CD63 antigen OS=Homo sapiens OX=9606 GN=CD63 PE=1 SV=2	1	1	1	1	4.2	25.636	0	0	0	0	0	0	0	0	0	0	0	0	15547
sp|P09104|ENOG_HUMAN	ENO2	sp|P09104|ENOG_HUMAN Gamma-enolase OS=Homo sapiens OX=9606 GN=ENO2 PE=1 SV=3	1	3	2	2	9.9	47.268	0	15488	23739	30721	0	0	19406	13611	0	0	46907	43842	0
sp|P09105|HBAT_HUMAN	HBQ1	sp|P09105|HBAT_HUMAN Hemoglobin subunit theta-1 OS=Homo sapiens OX=9606 GN=HBQ1 PE=1 SV=2	1	4	4	4	35.9	15.508	0	46769	36744	0	0	0	66856	36677	0	34390	50772	37079	0
sp|P09211|GSTP1_HUMAN	GSTP1	sp|P09211|GSTP1_HUMAN Glutathione S-transferase P OS=Homo sapiens OX=9606 GN=GSTP1 PE=1 SV=2	1	8	8	8	48.1	23.356	297640	1003800	329010	602010	0	311820	483410	462830	138940	147200	431190	2815500	204200
sp|P09382|LEG1_HUMAN	LGALS1	sp|P09382|LEG1_HUMAN Galectin-1 OS=Homo sapiens OX=9606 GN=LGALS1 PE=1 SV=2	1	5	5	5	46.7	14.716	424730	364390	235120	331560	210590	228060	528180	456200	218820	121720	330500	726150	213700
sp|P09417|DHPR_HUMAN	QDPR	sp|P09417|DHPR_HUMAN Dihydropteridine reductase OS=Homo sapiens OX=9606 GN=QDPR PE=1 SV=2	1	3	3	3	18	25.789	0	18858	36741	0	0	0	0	0	0	0	0	95113	0
sp|P09429|HMGB1_HUMAN;sp|B2RPK0|HGB1A_HUMAN	HMGB1	sp|P09429|HMGB1_HUMAN High mobility group protein B1 OS=Homo sapiens OX=9606 GN=HMGB1 PE=1 SV=3;sp|B2RPK0|HGB1A_HUMAN Putative high mobility group protein B1-like 1 OS=Homo sapiens OX=9606 GN=HMGB1P1 PE=5 SV=1	2	2	2	2	13.5	24.893	0	31932	0	0	0	0	16814	0	0	0	0	0	0
sp|P09455|RET1_HUMAN	RBP1	sp|P09455|RET1_HUMAN Retinol-binding protein 1 OS=Homo sapiens OX=9606 GN=RBP1 PE=1 SV=2	1	3	3	3	25.2	15.85	0	50708	0	29816	0	0	24453	12300	0	0	18866	92172	0
sp|P09467|F16P1_HUMAN	FBP1	sp|P09467|F16P1_HUMAN Fructose-1,6-bisphosphatase 1 OS=Homo sapiens OX=9606 GN=FBP1 PE=1 SV=5	1	1	1	1	4.1	36.842	0	0	0	0	0	0	4088.4	0	0	0	0	0	0
sp|P09486|SPRC_HUMAN	SPARC	sp|P09486|SPRC_HUMAN SPARC OS=Homo sapiens OX=9606 GN=SPARC PE=1 SV=1	1	9	9	9	35.3	34.632	68406	1804400	111290	238930	56082	356610	61280	108480	0	0	197510	96839	44833
sp|P09493|TPM1_HUMAN	TPM1	sp|P09493|TPM1_HUMAN Tropomyosin alpha-1 chain OS=Homo sapiens OX=9606 GN=TPM1 PE=1 SV=2	1	9	5	3	24.6	32.708	0	76549	216360	206850	96481	89188	225090	127530	0	29515	150860	132800	265610
sp|P09496|CLCA_HUMAN	CLTA	sp|P09496|CLCA_HUMAN Clathrin light chain A OS=Homo sapiens OX=9606 GN=CLTA PE=1 SV=1	1	2	2	2	6.9	27.076	0	0	0	29449	0	0	29647	0	0	16497	28053	66668	29237
sp|P09497|CLCB_HUMAN	CLTB	sp|P09497|CLCB_HUMAN Clathrin light chain B OS=Homo sapiens OX=9606 GN=CLTB PE=1 SV=1	1	2	2	2	8.3	25.19	0	0	68720	313340	0	0	119480	149800	0	0	739410	293210	425360
sp|P09525|ANXA4_HUMAN	ANXA4	sp|P09525|ANXA4_HUMAN Annexin A4 OS=Homo sapiens OX=9606 GN=ANXA4 PE=1 SV=4	1	6	6	6	21	35.882	72844	122370	94572	162840	0	164830	104850	107420	0	71812	142700	447810	0
sp|P09651|ROA1_HUMAN;sp|Q32P51|RA1L2_HUMAN	HNRNPA1	sp|P09651|ROA1_HUMAN Heterogeneous nuclear ribonucleoprotein A1 OS=Homo sapiens OX=9606 GN=HNRNPA1 PE=1 SV=5;sp|Q32P51|RA1L2_HUMAN Heterogeneous nuclear ribonucleoprotein A1-like 2 OS=Homo sapiens OX=9606 GN=HNRNPA1L2 PE=2 SV=2	2	4	4	4	15.1	38.746	0	47253	45507	0	0	0	51957	66724	0	0	53015	106240	0
sp|P09668|CATH_HUMAN	CTSH	sp|P09668|CATH_HUMAN Pro-cathepsin H OS=Homo sapiens OX=9606 GN=CTSH PE=1 SV=4	1	3	3	3	12.2	37.393	0	45070	0	17407	0	0	0	0	0	0	0	9776.8	0
sp|P09871|C1S_HUMAN	C1S	sp|P09871|C1S_HUMAN Complement C1s subcomponent OS=Homo sapiens OX=9606 GN=C1S PE=1 SV=1	1	13	13	12	26	76.684	251820	1950500	731090	490200	258860	922360	719340	447610	243200	134890	646260	201750	140850
sp|P09936|UCHL1_HUMAN	UCHL1	sp|P09936|UCHL1_HUMAN Ubiquitin carboxyl-terminal hydrolase isozyme L1 OS=Homo sapiens OX=9606 GN=UCHL1 PE=1 SV=2	1	7	7	7	43.9	24.824	100230	148170	80790	488270	0	206000	125800	149850	0	71535	177390	428630	94105
sp|P09958|FURIN_HUMAN	FURIN	sp|P09958|FURIN_HUMAN Furin OS=Homo sapiens OX=9606 GN=FURIN PE=1 SV=2	1	1	1	1	2.5	86.677	0	15529	0	0	0	0	0	0	0	0	0	0	0
sp|P09960|LKHA4_HUMAN	LTA4H	sp|P09960|LKHA4_HUMAN Leukotriene A-4 hydrolase OS=Homo sapiens OX=9606 GN=LTA4H PE=1 SV=2	1	10	10	10	23.1	69.284	0	90090	80830	68282	0	0	101550	0	0	0	77987	286490	0
sp|P09972|ALDOC_HUMAN	ALDOC	sp|P09972|ALDOC_HUMAN Fructose-bisphosphate aldolase C OS=Homo sapiens OX=9606 GN=ALDOC PE=1 SV=2	1	2	2	2	10.2	39.455	0	87439	50352	0	0	0	0	0	0	0	58201	0	0
sp|P0C0L4|CO4A_HUMAN;CON__ENSEMBL:ENSBTAP00000007350;CON__P01030	C4A	sp|P0C0L4|CO4A_HUMAN Complement C4-A OS=Homo sapiens OX=9606 GN=C4A PE=1 SV=2	3	58	2	2	35.1	192.78	0	721580	86135	0	0	0	0	0	0	0	0	0	0
sp|P0C0L5|CO4B_HUMAN	C4B	sp|P0C0L5|CO4B_HUMAN Complement C4-B OS=Homo sapiens OX=9606 GN=C4B PE=1 SV=2	1	59	59	3	36.4	192.75	4306300	36404000	16836000	3229500	1519800	8123300	14598000	10115000	2786500	5464600	15355000	3525500	3197900
sp|P0DJI8|SAA1_HUMAN	SAA1	sp|P0DJI8|SAA1_HUMAN Serum amyloid A-1 protein OS=Homo sapiens OX=9606 GN=SAA1 PE=1 SV=1	1	4	4	2	47.5	13.532	0	0	485710	0	0	0	0	0	0	0	0	0	0
sp|P0DMV9|HS71B_HUMAN;sp|P0DMV8|HS71A_HUMAN	HSPA1B	sp|P0DMV9|HS71B_HUMAN Heat shock 70 kDa protein 1B OS=Homo sapiens OX=9606 GN=HSPA1B PE=1 SV=1;sp|P0DMV8|HS71A_HUMAN Heat shock 70 kDa protein 1A OS=Homo sapiens OX=9606 GN=HSPA1A PE=1 SV=1	2	18	18	9	30.1	70.051	634080	859140	739170	1276900	579660	518780	934830	987950	217770	783890	935730	2045100	582020
sp|P0DOX2|IGA2_HUMAN		sp|P0DOX2|IGA2_HUMAN Immunoglobulin alpha-2 heavy chain OS=Homo sapiens OX=9606 PE=1 SV=2	1	9	8	2	26.2	48.934	4336400	3973000	1941100	1337600	968760	3679200	4049700	2019600	1750900	3095500	2093900	1513100	2142700
sp|P0DOX3|IGD_HUMAN;sp|P01880|IGHD_HUMAN	IGHD	sp|P0DOX3|IGD_HUMAN Immunoglobulin delta heavy chain OS=Homo sapiens OX=9606 PE=1 SV=1;sp|P01880|IGHD_HUMAN Immunoglobulin heavy constant delta OS=Homo sapiens OX=9606 GN=IGHD PE=1 SV=3	2	7	7	7	17.2	56.224	0	0	335500	99445	0	229700	202590	116580	0	184330	89307	124960	81569
sp|P0DOX5|IGG1_HUMAN;sp|P01857|IGHG1_HUMAN	IGHG1	sp|P0DOX5|IGG1_HUMAN Immunoglobulin gamma-1 heavy chain OS=Homo sapiens OX=9606 PE=1 SV=2;sp|P01857|IGHG1_HUMAN Immunoglobulin heavy constant gamma 1 OS=Homo sapiens OX=9606 GN=IGHG1 PE=1 SV=1	2	19	19	11	49.4	49.328	67946000	173170000	79481000	59487000	46160000	91294000	143080000	108200000	88858000	57580000	68336000	54079000	54687000
sp|P0DOX7|IGK_HUMAN		sp|P0DOX7|IGK_HUMAN Immunoglobulin kappa light chain OS=Homo sapiens OX=9606 PE=1 SV=1	1	10	10	2	57.5	23.379	59020000	40588000	44113000	44349000	19789000	70440000	58055000	59138000	38560000	73659000	26279000	28165000	40247000
sp|P0DOX8|IGL1_HUMAN;sp|B9A064|IGLL5_HUMAN;sp|P0CG04|IGLC1_HUMAN;sp|P01709|LV208_HUMAN	IGLL5	sp|P0DOX8|IGL1_HUMAN Immunoglobulin lambda-1 light chain OS=Homo sapiens OX=9606 PE=1 SV=1;sp|B9A064|IGLL5_HUMAN Immunoglobulin lambda-like polypeptide 5 OS=Homo sapiens OX=9606 GN=IGLL5 PE=2 SV=2;sp|P0CG04|IGLC1_HUMAN Immunoglobulin lambda constant 1 OS=H	4	9	9	3	47.7	22.83	31731000	28425000	23371000	24060000	21819000	49145000	35635000	29606000	23651000	44556000	20757000	11677000	30970000
sp|P0DOY2|IGLC2_HUMAN;sp|P0DOY3|IGLC3_HUMAN;sp|P0CF74|IGLC6_HUMAN	IGLC2	sp|P0DOY2|IGLC2_HUMAN Immunoglobulin lambda constant 2 OS=Homo sapiens OX=9606 GN=IGLC2 PE=1 SV=1;sp|P0DOY3|IGLC3_HUMAN Immunoglobulin lambda constant 3 OS=Homo sapiens OX=9606 GN=IGLC3 PE=1 SV=1	3	8	3	2	88.7	11.293	1145600	19089000	17559000	17236000	17944000	40998000	20964000	24443000	28196000	26145000	14784000	9431200	18239000
sp|P0DP03|HVC05_HUMAN;sp|P01768|HV330_HUMAN;sp|P01764|HV323_HUMAN	IGHV3-30-5	sp|P0DP03|HVC05_HUMAN Immunoglobulin heavy variable 3-30-5 OS=Homo sapiens OX=9606 GN=IGHV3-30-5 PE=3 SV=1;sp|P01768|HV330_HUMAN Immunoglobulin heavy variable 3-30 OS=Homo sapiens OX=9606 GN=IGHV3-30 PE=1 SV=2;sp|P01764|HV323_HUMAN Immunoglobulin heavy var	3	2	1	1	18.8	12.947	0	0	0	0	0	0	0	0	0	0	0	0	738010
sp|P0DP04|HV43D_HUMAN;sp|P01782|HV309_HUMAN	IGHV3-43D	sp|P0DP04|HV43D_HUMAN Immunoglobulin heavy variable 3-43D OS=Homo sapiens OX=9606 GN=IGHV3-43D PE=3 SV=1;sp|P01782|HV309_HUMAN Immunoglobulin heavy variable 3-9 OS=Homo sapiens OX=9606 GN=IGHV3-9 PE=1 SV=2	2	2	1	1	18.6	13.017	0	0	0	0	0	0	0	0	0	0	0	0	811570
sp|P0DP09|KV113_HUMAN;sp|A0A0B4J2D9|KVD13_HUMAN	IGKV1-13	sp|P0DP09|KV113_HUMAN Immunoglobulin kappa variable 1-13 OS=Homo sapiens OX=9606 GN=IGKV1-13 PE=3 SV=1;sp|A0A0B4J2D9|KVD13_HUMAN Immunoglobulin kappa variable 1D-13 OS=Homo sapiens OX=9606 GN=IGKV1D-13 PE=3 SV=1	2	2	2	2	29.1	12.569	0	14359	0	0	0	0	0	0	0	0	0	0	0
sp|P0DP25|CALM3_HUMAN;sp|P0DP24|CALM2_HUMAN;sp|P0DP23|CALM1_HUMAN	CALM3	sp|P0DP25|CALM3_HUMAN Calmodulin-3 OS=Homo sapiens OX=9606 GN=CALM3 PE=1 SV=1;sp|P0DP24|CALM2_HUMAN Calmodulin-2 OS=Homo sapiens OX=9606 GN=CALM2 PE=1 SV=1;sp|P0DP23|CALM1_HUMAN Calmodulin-1 OS=Homo sapiens OX=9606 GN=CALM1 PE=1 SV=1	3	6	6	5	38.3	16.837	56630	249650	484620	332660	191970	161470	426340	414230	0	91028	321940	775930	429060
sp|P0DPI2|GAL3A_HUMAN;sp|A0A0B4J2D5|GAL3B_HUMAN	GATD3A	sp|P0DPI2|GAL3A_HUMAN Glutamine amidotransferase-like class 1 domain-containing protein 3A, mitochondrial OS=Homo sapiens OX=9606 GN=GATD3A PE=1 SV=1;sp|A0A0B4J2D5|GAL3B_HUMAN Glutamine amidotransferase-like class 1 domain-containing protein 3B, mitochondr	2	2	2	2	9.3	28.17	0	0	0	20004	0	0	0	0	0	0	14842	6831.8	0
sp|P0DSN7|KVD37_HUMAN;sp|A0A075B6S9|KV137_HUMAN	IGKV1D-37	sp|P0DSN7|KVD37_HUMAN Probable non-functional immunoglobulinn kappa variable 1D-37 OS=Homo sapiens OX=9606 GN=IGKV1D-37 PE=5 SV=1;sp|A0A075B6S9|KV137_HUMAN Probable non-functional immunoglobulinn kappa variable 1-37 OS=Homo sapiens OX=9606 GN=IGKV1-37 PE=5	2	1	1	1	13.7	12.688	0	0	0	0	0	0	6046.3	0	0	0	0	0	0
sp|P10253|LYAG_HUMAN	GAA	sp|P10253|LYAG_HUMAN Lysosomal alpha-glucosidase OS=Homo sapiens OX=9606 GN=GAA PE=1 SV=4	1	2	2	2	3.2	105.32	0	18273	0	0	0	0	0	0	0	0	0	24143	0
sp|P10599|THIO_HUMAN	TXN	sp|P10599|THIO_HUMAN Thioredoxin OS=Homo sapiens OX=9606 GN=TXN PE=1 SV=3	1	3	3	3	29.5	11.737	579220	515370	500860	351730	474480	344380	544070	721080	303180	804270	749400	1164900	661130
sp|P10643|CO7_HUMAN;CON__Q29RQ1	C7	sp|P10643|CO7_HUMAN Complement component C7 OS=Homo sapiens OX=9606 GN=C7 PE=1 SV=2	2	31	31	31	45.4	93.517	453280	7112500	895790	513710	253680	1915100	1141100	610770	1287700	359960	1020700	539760	247530
sp|P10645|CMGA_HUMAN	CHGA	sp|P10645|CMGA_HUMAN Chromogranin-A OS=Homo sapiens OX=9606 GN=CHGA PE=1 SV=7	1	2	2	2	7.2	50.688	0	0	38285	0	0	0	0	0	0	0	49423	0	0
sp|P10746|HEM4_HUMAN	UROS	sp|P10746|HEM4_HUMAN Uroporphyrinogen-III synthase OS=Homo sapiens OX=9606 GN=UROS PE=1 SV=1	1	1	1	1	5.7	28.627	0	0	0	0	0	0	0	0	0	0	0	9609.7	0
sp|P10768|ESTD_HUMAN	ESD	sp|P10768|ESTD_HUMAN S-formylglutathione hydrolase OS=Homo sapiens OX=9606 GN=ESD PE=1 SV=2	1	5	5	5	27	31.462	281950	168620	269090	253620	94423	191710	160480	197080	0	594500	186490	416300	74928
sp|P10809|CH60_HUMAN	HSPD1	sp|P10809|CH60_HUMAN 60 kDa heat shock protein, mitochondrial OS=Homo sapiens OX=9606 GN=HSPD1 PE=1 SV=2	1	3	3	3	5.8	61.054	0	23168	0	34870	0	0	43680	0	0	0	0	0	0
sp|P10909|CLUS_HUMAN	CLU	sp|P10909|CLUS_HUMAN Clusterin OS=Homo sapiens OX=9606 GN=CLU PE=1 SV=1	1	16	16	16	33.2	52.494	7247000	27032000	13670000	11612000	4182600	12296000	9542100	8083700	16586000	1229700	23039000	4918500	6632200
sp|P11021|BIP_HUMAN	HSPA5	sp|P11021|BIP_HUMAN Endoplasmic reticulum chaperone BiP OS=Homo sapiens OX=9606 GN=HSPA5 PE=1 SV=2	1	16	15	15	31.7	72.332	0	401810	180220	418520	0	124050	322890	327250	0	138390	255370	653540	242010
sp|P11142|HSP7C_HUMAN	HSPA8	sp|P11142|HSP7C_HUMAN Heat shock cognate 71 kDa protein OS=Homo sapiens OX=9606 GN=HSPA8 PE=1 SV=1	1	18	17	12	31.3	70.897	463430	954610	880950	852540	371620	309450	962240	796360	109150	1104200	936520	2005200	454530
sp|P11166|GTR1_HUMAN	SLC2A1	sp|P11166|GTR1_HUMAN Solute carrier family 2, facilitated glucose transporter member 1 OS=Homo sapiens OX=9606 GN=SLC2A1 PE=1 SV=2	1	6	6	6	12	54.083	251570	324410	620750	309800	109470	123850	333180	129930	0	486180	597040	331220	77587
sp|P11171|41_HUMAN	EPB41	sp|P11171|41_HUMAN Protein 4.1 OS=Homo sapiens OX=9606 GN=EPB41 PE=1 SV=4	1	18	18	16	24.3	97.016	815970	604680	810740	316780	649340	167330	553170	680990	224360	1006900	925080	781650	352960
sp|P11216|PYGB_HUMAN;sp|P11217|PYGM_HUMAN	PYGB	sp|P11216|PYGB_HUMAN Glycogen phosphorylase, brain form OS=Homo sapiens OX=9606 GN=PYGB PE=1 SV=5	2	4	4	3	6.6	96.695	0	16431	7131.4	0	0	0	15715	0	0	0	0	65816	0
sp|P11226|MBL2_HUMAN	MBL2	sp|P11226|MBL2_HUMAN Mannose-binding protein C OS=Homo sapiens OX=9606 GN=MBL2 PE=1 SV=2	1	2	2	2	8.9	26.143	0	0	45118	32501	0	0	50854	13572	0	0	0	0	0
sp|P11277|SPTB1_HUMAN	SPTB	sp|P11277|SPTB1_HUMAN Spectrin beta chain, erythrocytic OS=Homo sapiens OX=9606 GN=SPTB PE=1 SV=5	1	74	74	71	39.1	246.47	3003400	2542400	3951400	1691800	2622200	1032500	2103300	2510700	951940	4053700	3538300	3923800	1030900
sp|P11279|LAMP1_HUMAN	LAMP1	sp|P11279|LAMP1_HUMAN Lysosome-associated membrane glycoprotein 1 OS=Homo sapiens OX=9606 GN=LAMP1 PE=1 SV=3	1	2	2	2	4.8	44.882	0	0	0	0	0	0	18062	0	0	0	0	0	0
sp|P11413|G6PD_HUMAN	G6PD	sp|P11413|G6PD_HUMAN Glucose-6-phosphate 1-dehydrogenase OS=Homo sapiens OX=9606 GN=G6PD PE=1 SV=4	1	3	3	3	9.3	59.256	0	20698	0	0	0	0	7914.7	0	0	0	0	39093	0
sp|P11586|C1TC_HUMAN	MTHFD1	sp|P11586|C1TC_HUMAN C-1-tetrahydrofolate synthase, cytoplasmic OS=Homo sapiens OX=9606 GN=MTHFD1 PE=1 SV=3	1	1	1	1	1.7	101.56	0	0	0	0	0	0	0	0	0	0	4838.5	0	0
sp|P11766|ADHX_HUMAN	ADH5	sp|P11766|ADHX_HUMAN Alcohol dehydrogenase class-3 OS=Homo sapiens OX=9606 GN=ADH5 PE=1 SV=4	1	8	8	8	27	39.724	0	114550	61610	152680	0	0	95464	65163	0	0	85559	181810	0
sp|P12109|CO6A1_HUMAN	COL6A1	sp|P12109|CO6A1_HUMAN Collagen alpha-1(VI) chain OS=Homo sapiens OX=9606 GN=COL6A1 PE=1 SV=3	1	6	6	6	8.6	108.53	0	116700	39701	18159	0	0	27973	0	0	0	33825	23015	0
sp|P12111|CO6A3_HUMAN	COL6A3	sp|P12111|CO6A3_HUMAN Collagen alpha-3(VI) chain OS=Homo sapiens OX=9606 GN=COL6A3 PE=1 SV=5	1	3	3	3	1.2	343.67	0	0	0	0	0	0	9475.2	0	0	0	0	10978	0
sp|P12236|ADT3_HUMAN;sp|P12235|ADT1_HUMAN;sp|P05141|ADT2_HUMAN	SLC25A6	sp|P12236|ADT3_HUMAN ADP/ATP translocase 3 OS=Homo sapiens OX=9606 GN=SLC25A6 PE=1 SV=4;sp|P12235|ADT1_HUMAN ADP/ATP translocase 1 OS=Homo sapiens OX=9606 GN=SLC25A4 PE=1 SV=4;sp|P05141|ADT2_HUMAN ADP/ATP translocase 2 OS=Homo sapiens OX=9606 GN=SLC25A5 PE	3	2	2	1	6.4	32.866	0	0	0	0	0	0	0	0	0	0	0	0	124580
sp|P12273|PIP_HUMAN	PIP	sp|P12273|PIP_HUMAN Prolactin-inducible protein OS=Homo sapiens OX=9606 GN=PIP PE=1 SV=1	1	2	2	2	17.8	16.572	0	16129	0	0	0	0	0	0	0	631790	39345	0	0
sp|P12277|KCRB_HUMAN	CKB	sp|P12277|KCRB_HUMAN Creatine kinase B-type OS=Homo sapiens OX=9606 GN=CKB PE=1 SV=1	1	6	6	6	17.3	42.644	0	209220	312030	145190	0	0	306150	162650	0	0	207820	1080900	0
sp|P12429|ANXA3_HUMAN	ANXA3	sp|P12429|ANXA3_HUMAN Annexin A3 OS=Homo sapiens OX=9606 GN=ANXA3 PE=1 SV=3	1	5	5	5	17.6	36.375	0	54643	40116	86851	0	86103	77826	70192	0	0	45261	178590	0
sp|P12814|ACTN1_HUMAN;sp|P35609|ACTN2_HUMAN;sp|Q08043|ACTN3_HUMAN	ACTN1	sp|P12814|ACTN1_HUMAN Alpha-actinin-1 OS=Homo sapiens OX=9606 GN=ACTN1 PE=1 SV=2	3	21	12	12	27	103.06	0	188500	121040	171440	0	50088	218030	122210	0	38701	83830	400070	0
sp|P12829|MYL4_HUMAN	MYL4	sp|P12829|MYL4_HUMAN Myosin light chain 4 OS=Homo sapiens OX=9606 GN=MYL4 PE=1 SV=3	1	3	3	3	23.4	21.564	0	0	0	0	0	0	118010	0	0	0	0	0	0
sp|P12830|CADH1_HUMAN	CDH1	sp|P12830|CADH1_HUMAN Cadherin-1 OS=Homo sapiens OX=9606 GN=CDH1 PE=1 SV=3	1	2	2	2	2.8	97.455	0	108810	0	0	0	0	0	0	0	0	0	0	0
sp|P12955|PEPD_HUMAN	PEPD	sp|P12955|PEPD_HUMAN Xaa-Pro dipeptidase OS=Homo sapiens OX=9606 GN=PEPD PE=1 SV=3	1	6	6	6	16.8	54.548	0	32126	28931	26828	0	0	54898	0	0	0	0	75450	0
sp|P12956|XRCC6_HUMAN	XRCC6	sp|P12956|XRCC6_HUMAN X-ray repair cross-complementing protein 6 OS=Homo sapiens OX=9606 GN=XRCC6 PE=1 SV=2	1	5	5	5	11.3	69.842	0	20130	0	0	0	0	20804	0	0	0	0	34078	0
sp|P13010|XRCC5_HUMAN	XRCC5	sp|P13010|XRCC5_HUMAN X-ray repair cross-complementing protein 5 OS=Homo sapiens OX=9606 GN=XRCC5 PE=1 SV=3	1	1	1	1	1.9	82.704	0	0	0	0	0	0	0	0	0	0	0	17700	0
sp|P13164|IFM1_HUMAN;sp|Q01629|IFM2_HUMAN;sp|Q01628|IFM3_HUMAN	IFITM1	sp|P13164|IFM1_HUMAN Interferon-induced transmembrane protein 1 OS=Homo sapiens OX=9606 GN=IFITM1 PE=1 SV=3;sp|Q01629|IFM2_HUMAN Interferon-induced transmembrane protein 2 OS=Homo sapiens OX=9606 GN=IFITM2 PE=1 SV=2;sp|Q01628|IFM3_HUMAN Interferon-induced	3	2	2	1	29.6	13.964	0	0	0	0	0	0	0	0	0	0	8417.1	0	0
sp|P13489|RINI_HUMAN	RNH1	sp|P13489|RINI_HUMAN Ribonuclease inhibitor OS=Homo sapiens OX=9606 GN=RNH1 PE=1 SV=2	1	9	9	9	32.1	49.973	154830	227550	295520	272320	614040	102200	210150	233180	285230	146890	235370	559770	160380
sp|P13591|NCAM1_HUMAN	NCAM1	sp|P13591|NCAM1_HUMAN Neural cell adhesion molecule 1 OS=Homo sapiens OX=9606 GN=NCAM1 PE=1 SV=3	1	5	5	5	7.2	94.573	0	40057	122430	71162	0	0	84764	59143	0	0	148860	76059	72816
sp|P13639|EF2_HUMAN	EEF2	sp|P13639|EF2_HUMAN Elongation factor 2 OS=Homo sapiens OX=9606 GN=EEF2 PE=1 SV=4	1	4	4	4	5.5	95.337	0	18246	0	0	0	0	0	0	0	0	0	43367	0
sp|P13667|PDIA4_HUMAN	PDIA4	sp|P13667|PDIA4_HUMAN Protein disulfide-isomerase A4 OS=Homo sapiens OX=9606 GN=PDIA4 PE=1 SV=2	1	3	3	3	5.1	72.932	0	29967	0	0	0	0	0	0	0	0	0	65226	0
sp|P13671|CO6_HUMAN	C6	sp|P13671|CO6_HUMAN Complement component C6 OS=Homo sapiens OX=9606 GN=C6 PE=1 SV=3	1	21	21	21	27.8	104.79	0	2142100	185120	141070	64734	305910	512560	407090	0	97030	268980	231670	133710
sp|P13688|CEAM1_HUMAN;sp|P31997|CEAM8_HUMAN;sp|P06731|CEAM5_HUMAN	CEACAM1	sp|P13688|CEAM1_HUMAN Carcinoembryonic antigen-related cell adhesion molecule 1 OS=Homo sapiens OX=9606 GN=CEACAM1 PE=1 SV=2;sp|P31997|CEAM8_HUMAN Carcinoembryonic antigen-related cell adhesion molecule 8 OS=Homo sapiens OX=9606 GN=CEACAM8 PE=1 SV=2;sp|P06	3	2	2	2	4.2	57.56	0	16578	0	0	0	0	0	0	0	0	0	0	0
sp|P13716|HEM2_HUMAN	ALAD	sp|P13716|HEM2_HUMAN Delta-aminolevulinic acid dehydratase OS=Homo sapiens OX=9606 GN=ALAD PE=1 SV=1	1	10	10	10	35.5	36.294	431340	363730	723020	305190	123070	210120	215610	260620	0	441610	474420	993780	0
sp|P13796|PLSL_HUMAN	LCP1	sp|P13796|PLSL_HUMAN Plastin-2 OS=Homo sapiens OX=9606 GN=LCP1 PE=1 SV=6	1	11	11	7	22.5	70.288	0	362310	385340	0	0	0	613150	404930	0	0	280810	916400	0
sp|P13797|PLST_HUMAN	PLS3	sp|P13797|PLST_HUMAN Plastin-3 OS=Homo sapiens OX=9606 GN=PLS3 PE=1 SV=4	1	5	1	1	8.4	70.81	0	0	0	0	0	0	0	0	0	0	0	11456	0
sp|P13798|ACPH_HUMAN	APEH	sp|P13798|ACPH_HUMAN Acylamino-acid-releasing enzyme OS=Homo sapiens OX=9606 GN=APEH PE=1 SV=4	1	10	10	10	16.4	81.224	178450	152710	348120	164820	98700	126880	158260	81347	0	233370	296690	454460	104260
sp|P13804|ETFA_HUMAN	ETFA	sp|P13804|ETFA_HUMAN Electron transfer flavoprotein subunit alpha, mitochondrial OS=Homo sapiens OX=9606 GN=ETFA PE=1 SV=1	1	1	1	1	5.4	35.079	0	0	0	0	0	0	0	0	0	0	0	3561.2	0
sp|P13929|ENOB_HUMAN	ENO3	sp|P13929|ENOB_HUMAN Beta-enolase OS=Homo sapiens OX=9606 GN=ENO3 PE=1 SV=5	1	4	3	3	12.9	46.986	0	0	0	63221	0	0	77278	0	0	0	0	0	0
sp|P13942|COBA2_HUMAN	COL11A2	sp|P13942|COBA2_HUMAN Collagen alpha-2(XI) chain OS=Homo sapiens OX=9606 GN=COL11A2 PE=1 SV=5	1	3	3	3	2.5	171.79	0	67901	0	0	0	0	6335.1	0	0	0	0	0	0
sp|P13987|CD59_HUMAN	CD59	sp|P13987|CD59_HUMAN CD59 glycoprotein OS=Homo sapiens OX=9606 GN=CD59 PE=1 SV=1	1	4	4	4	25	14.177	59322	595410	126150	240440	67351	256890	162710	183130	77713	104360	259680	94619	109090
sp|P14136|GFAP_HUMAN	GFAP	sp|P14136|GFAP_HUMAN Glial fibrillary acidic protein OS=Homo sapiens OX=9606 GN=GFAP PE=1 SV=1	1	2	1	1	4.4	49.88	0	0	0	0	0	0	0	0	0	0	0	5001.2	0
sp|P14151|LYAM1_HUMAN	SELL	sp|P14151|LYAM1_HUMAN L-selectin OS=Homo sapiens OX=9606 GN=SELL PE=1 SV=2	1	2	2	2	7	42.187	0	0	27167	0	0	0	36689	21773	0	0	0	19517	0
sp|P14174|MIF_HUMAN	MIF	sp|P14174|MIF_HUMAN Macrophage migration inhibitory factor OS=Homo sapiens OX=9606 GN=MIF PE=1 SV=4	1	2	2	2	17.4	12.476	0	264810	46243	60862	0	0	175780	91154	0	0	69065	438510	0
sp|P14209|CD99_HUMAN	CD99	sp|P14209|CD99_HUMAN CD99 antigen OS=Homo sapiens OX=9606 GN=CD99 PE=1 SV=1	1	1	1	1	7.6	18.848	0	0	0	0	0	0	0	0	0	0	0	5117.1	0
sp|P14314|GLU2B_HUMAN	PRKCSH	sp|P14314|GLU2B_HUMAN Glucosidase 2 subunit beta OS=Homo sapiens OX=9606 GN=PRKCSH PE=1 SV=2	1	3	3	3	6.2	59.425	0	40666	56251	74961	39615	53349	51807	56090	0	0	48001	83980	97376
sp|P14550|AK1A1_HUMAN	AKR1A1	sp|P14550|AK1A1_HUMAN Aldo-keto reductase family 1 member A1 OS=Homo sapiens OX=9606 GN=AKR1A1 PE=1 SV=3	1	6	6	6	25.8	36.573	0	111290	33242	28275	0	0	77912	48889	0	43858	75652	179210	0
sp|P14618|KPYM_HUMAN	PKM	sp|P14618|KPYM_HUMAN Pyruvate kinase PKM OS=Homo sapiens OX=9606 GN=PKM PE=1 SV=4	1	23	23	22	49.2	57.936	731260	1547800	453410	1256500	1015700	943200	1040100	578050	341450	326080	906090	1458300	761640
sp|P14625|ENPL_HUMAN;sp|Q58FF3|ENPLL_HUMAN	HSP90B1	sp|P14625|ENPL_HUMAN Endoplasmin OS=Homo sapiens OX=9606 GN=HSP90B1 PE=1 SV=1	2	12	11	11	17.4	92.468	0	142080	84020	217170	0	63260	102250	125290	0	0	111010	237830	104940
sp|P14923|PLAK_HUMAN	JUP	sp|P14923|PLAK_HUMAN Junction plakoglobin OS=Homo sapiens OX=9606 GN=JUP PE=1 SV=3	1	6	6	6	9.7	81.744	62718	0	41742	170840	1710200	248780	19985	30421	202300	375200	35343	11399	1173400
sp|P15104|GLNA_HUMAN	GLUL	sp|P15104|GLNA_HUMAN Glutamine synthetase OS=Homo sapiens OX=9606 GN=GLUL PE=1 SV=4	1	5	5	5	17.7	42.064	0	129660	46229	70846	0	0	68018	0	0	0	58623	139460	116680
sp|P15121|ALDR_HUMAN;sp|C9JRZ8|AK1BF_HUMAN	AKR1B1	sp|P15121|ALDR_HUMAN Aldo-keto reductase family 1 member B1 OS=Homo sapiens OX=9606 GN=AKR1B1 PE=1 SV=3	2	4	4	4	14.2	35.853	93788	56027	34067	67296	166730	89066	57683	31017	0	45930	55273	149420	0
sp|P15144|AMPN_HUMAN	ANPEP	sp|P15144|AMPN_HUMAN Aminopeptidase N OS=Homo sapiens OX=9606 GN=ANPEP PE=1 SV=4	1	8	8	8	9.1	109.54	0	154880	53169	37854	0	26176	82490	37045	0	0	29333	60926	0
sp|P15169|CBPN_HUMAN	CPN1	sp|P15169|CBPN_HUMAN Carboxypeptidase N catalytic chain OS=Homo sapiens OX=9606 GN=CPN1 PE=1 SV=1	1	2	2	2	4.8	52.286	0	28181	55378	0	0	0	77911	22412	0	0	0	26011	0
sp|P15311|EZRI_HUMAN	EZR	sp|P15311|EZRI_HUMAN Ezrin OS=Homo sapiens OX=9606 GN=EZR PE=1 SV=4	1	8	4	4	14.8	69.412	0	32131	0	0	0	0	17884	11707	0	0	0	24525	0
sp|P15328|FOLR1_HUMAN	FOLR1	sp|P15328|FOLR1_HUMAN Folate receptor alpha OS=Homo sapiens OX=9606 GN=FOLR1 PE=1 SV=3	1	3	3	3	12.8	29.819	0	49095	0	0	0	0	0	0	0	0	0	0	0
sp|P15374|UCHL3_HUMAN	UCHL3	sp|P15374|UCHL3_HUMAN Ubiquitin carboxyl-terminal hydrolase isozyme L3 OS=Homo sapiens OX=9606 GN=UCHL3 PE=1 SV=1	1	5	5	5	33	26.182	0	45416	50474	33629	0	34408	42372	34648	0	25218	31749	90708	0
sp|P15531|NDKA_HUMAN	NME1	sp|P15531|NDKA_HUMAN Nucleoside diphosphate kinase A OS=Homo sapiens OX=9606 GN=NME1 PE=1 SV=1	1	5	5	2	34.9	17.149	465830	325690	513310	331060	269920	87781	391360	399650	0	1125100	524600	772650	149350
sp|P15586|GNS_HUMAN	GNS	sp|P15586|GNS_HUMAN N-acetylglucosamine-6-sulfatase OS=Homo sapiens OX=9606 GN=GNS PE=1 SV=3	1	2	2	2	3.8	62.081	0	13996	0	0	0	0	0	0	0	0	0	21100	0
sp|P15924|DESP_HUMAN	DSP	sp|P15924|DESP_HUMAN Desmoplakin OS=Homo sapiens OX=9606 GN=DSP PE=1 SV=3	1	38	38	38	12.6	331.77	731980	115420	318690	870410	6198300	1624200	114420	362740	2689100	2002300	303580	155220	3939900
sp|P16035|TIMP2_HUMAN	TIMP2	sp|P16035|TIMP2_HUMAN Metalloproteinase inhibitor 2 OS=Homo sapiens OX=9606 GN=TIMP2 PE=1 SV=2	1	3	3	3	10.5	24.399	45522	538380	12202	25129	0	127250	11324	7067.9	0	0	20030	0	0
sp|P16070|CD44_HUMAN	CD44	sp|P16070|CD44_HUMAN CD44 antigen OS=Homo sapiens OX=9606 GN=CD44 PE=1 SV=3	1	5	5	5	7.4	81.537	44110	49328	45343	33052	31630	52264	73057	35883	0	0	0	0	0
sp|P16083|NQO2_HUMAN	NQO2	sp|P16083|NQO2_HUMAN Ribosyldihydronicotinamide dehydrogenase [quinone] OS=Homo sapiens OX=9606 GN=NQO2 PE=1 SV=5	1	1	1	1	5.2	25.918	0	0	0	0	0	0	0	0	0	0	0	7683.6	0
sp|P16112|PGCA_HUMAN	ACAN	sp|P16112|PGCA_HUMAN Aggrecan core protein OS=Homo sapiens OX=9606 GN=ACAN PE=1 SV=3	1	2	2	2	0.9	261.33	0	0	0	39557	0	31929	0	0	0	0	0	0	0
sp|P16152|CBR1_HUMAN	CBR1	sp|P16152|CBR1_HUMAN Carbonyl reductase [NADPH] 1 OS=Homo sapiens OX=9606 GN=CBR1 PE=1 SV=3	1	6	6	4	29.2	30.375	0	139390	68968	88236	0	0	102070	78745	0	0	95266	302740	0
sp|P16157|ANK1_HUMAN;sp|Q01484|ANK2_HUMAN;sp|Q12955|ANK3_HUMAN	ANK1	sp|P16157|ANK1_HUMAN Ankyrin-1 OS=Homo sapiens OX=9606 GN=ANK1 PE=1 SV=3	3	50	50	50	34.7	206.26	1666300	2001200	3543200	949030	1181500	450880	1838700	2016100	134110	2600700	2282100	3141300	428290
sp|P16452|EPB42_HUMAN	EPB42	sp|P16452|EPB42_HUMAN Erythrocyte membrane protein band 4.2 OS=Homo sapiens OX=9606 GN=EPB42 PE=1 SV=3	1	10	10	10	17.5	77.008	53807	198320	361480	278150	138680	69712	262600	83546	0	448980	637160	120890	120030
sp|P16930|FAAA_HUMAN	FAH	sp|P16930|FAAA_HUMAN Fumarylacetoacetase OS=Homo sapiens OX=9606 GN=FAH PE=1 SV=2	1	4	4	4	11.2	46.374	0	44825	68483	53597	0	26135	62484	42343	0	113880	71848	103060	49258
sp|P17066|HSP76_HUMAN;sp|P48741|HSP77_HUMAN	HSPA6	sp|P17066|HSP76_HUMAN Heat shock 70 kDa protein 6 OS=Homo sapiens OX=9606 GN=HSPA6 PE=1 SV=2;sp|P48741|HSP77_HUMAN Putative heat shock 70 kDa protein 7 OS=Homo sapiens OX=9606 GN=HSPA7 PE=5 SV=2	2	7	1	1	12.9	71.027	0	0	0	0	0	0	0	0	0	0	0	610210	0
sp|P17174|AATC_HUMAN	GOT1	sp|P17174|AATC_HUMAN Aspartate aminotransferase, cytoplasmic OS=Homo sapiens OX=9606 GN=GOT1 PE=1 SV=3	1	3	3	3	10.2	46.247	0	44532	63029	31190	0	0	66684	38050	0	0	59863	106200	0
sp|P17655|CAN2_HUMAN	CAPN2	sp|P17655|CAN2_HUMAN Calpain-2 catalytic subunit OS=Homo sapiens OX=9606 GN=CAPN2 PE=1 SV=6	1	4	4	4	7.6	79.994	0	20451	0	0	0	0	21496	12823	0	0	13387	49179	0
sp|P17858|PFKAL_HUMAN;sp|Q01813|PFKAP_HUMAN	PFKL	sp|P17858|PFKAL_HUMAN ATP-dependent 6-phosphofructokinase, liver type OS=Homo sapiens OX=9606 GN=PFKL PE=1 SV=6	2	4	4	4	8.8	85.018	0	19508	17351	22803	0	0	26942	0	0	0	24000	22947	0
sp|P17931|LEG3_HUMAN	LGALS3	sp|P17931|LEG3_HUMAN Galectin-3 OS=Homo sapiens OX=9606 GN=LGALS3 PE=1 SV=5	1	4	4	4	20.4	26.152	0	138370	34018	85270	0	26601	113010	81812	0	17784	111550	174480	0
sp|P17936|IBP3_HUMAN	IGFBP3	sp|P17936|IBP3_HUMAN Insulin-like growth factor-binding protein 3 OS=Homo sapiens OX=9606 GN=IGFBP3 PE=1 SV=2	1	2	2	2	11	31.674	0	54112	37307	19329	0	0	20939	0	0	0	20366	15329	0
sp|P17980|PRS6A_HUMAN	PSMC3	sp|P17980|PRS6A_HUMAN 26S proteasome regulatory subunit 6A OS=Homo sapiens OX=9606 GN=PSMC3 PE=1 SV=3	1	1	1	1	4.6	49.203	0	0	0	0	0	0	0	0	0	0	0	9043.8	0
sp|P17987|TCPA_HUMAN	TCP1	sp|P17987|TCPA_HUMAN T-complex protein 1 subunit alpha OS=Homo sapiens OX=9606 GN=TCP1 PE=1 SV=1	1	2	2	2	4	60.343	0	0	0	0	0	0	0	0	0	0	0	22138	0
sp|P18206|VINC_HUMAN	VCL	sp|P18206|VINC_HUMAN Vinculin OS=Homo sapiens OX=9606 GN=VCL PE=1 SV=4	1	20	20	20	22.9	123.8	0	203160	266590	411900	59503	128800	353320	294630	29310	96201	239160	650690	199240
sp|P18669|PGAM1_HUMAN;sp|P15259|PGAM2_HUMAN;sp|Q8N0Y7|PGAM4_HUMAN	PGAM1	sp|P18669|PGAM1_HUMAN Phosphoglycerate mutase 1 OS=Homo sapiens OX=9606 GN=PGAM1 PE=1 SV=2;sp|P15259|PGAM2_HUMAN Phosphoglycerate mutase 2 OS=Homo sapiens OX=9606 GN=PGAM2 PE=1 SV=3	3	9	9	9	42.9	28.804	189210	314560	233650	346190	100640	115940	283790	162890	0	155290	276200	655920	247380
sp|P19021|AMD_HUMAN	PAM	sp|P19021|AMD_HUMAN Peptidyl-glycine alpha-amidating monooxygenase OS=Homo sapiens OX=9606 GN=PAM PE=1 SV=2	1	4	4	4	4.9	108.33	0	43539	0	0	0	0	0	0	0	0	0	0	0
sp|P19105|ML12A_HUMAN;sp|O14950|ML12B_HUMAN;sp|P24844|MYL9_HUMAN	MYL12A	sp|P19105|ML12A_HUMAN Myosin regulatory light chain 12A OS=Homo sapiens OX=9606 GN=MYL12A PE=1 SV=2;sp|O14950|ML12B_HUMAN Myosin regulatory light chain 12B OS=Homo sapiens OX=9606 GN=MYL12B PE=1 SV=2	3	3	3	3	18.1	19.794	52338	81555	15787	97287	0	68360	63428	120160	0	12013	60283	277090	0
sp|P19338|NUCL_HUMAN	NCL	sp|P19338|NUCL_HUMAN Nucleolin OS=Homo sapiens OX=9606 GN=NCL PE=1 SV=3	1	6	6	6	9.2	76.613	0	68728	39750	74411	113810	0	36791	39418	0	0	43597	57602	60258
sp|P19440|GGT1_HUMAN;sp|A6NGU5|GGT3_HUMAN;sp|P36268|GGT2_HUMAN;sp|Q14390|GGTL2_HUMAN;sp|B5MD39|GGTL3_HUMAN	GGT1	sp|P19440|GGT1_HUMAN Glutathione hydrolase 1 proenzyme OS=Homo sapiens OX=9606 GN=GGT1 PE=1 SV=2;sp|A6NGU5|GGT3_HUMAN Putative glutathione hydrolase 3 proenzyme OS=Homo sapiens OX=9606 GN=GGT3P PE=5 SV=2;sp|P36268|GGT2_HUMAN Inactive glutathione hydrolase	5	6	6	6	13.5	61.409	0	147440	0	0	0	0	0	0	0	0	0	0	0
sp|P19652|A1AG2_HUMAN	ORM2	sp|P19652|A1AG2_HUMAN Alpha-1-acid glycoprotein 2 OS=Homo sapiens OX=9606 GN=ORM2 PE=1 SV=2	1	7	4	4	35.3	23.602	1558900	1427700	1776500	924100	1070400	654240	3770100	1293500	3372700	1062800	1253900	1109600	1455100
sp|P19823|ITIH2_HUMAN;CON__Q9TRI1	ITIH2	sp|P19823|ITIH2_HUMAN Inter-alpha-trypsin inhibitor heavy chain H2 OS=Homo sapiens OX=9606 GN=ITIH2 PE=1 SV=2	2	19	19	19	21.7	106.46	1433200	2810200	6818400	2979000	952210	2982900	5524000	4701200	3561100	1649100	2608200	3206400	2641100
sp|P19827|ITIH1_HUMAN;CON__Q0VCM5	ITIH1	sp|P19827|ITIH1_HUMAN Inter-alpha-trypsin inhibitor heavy chain H1 OS=Homo sapiens OX=9606 GN=ITIH1 PE=1 SV=3	2	17	17	17	27.6	101.39	463470	1223100	2671200	949190	201150	777690	2327700	1960000	575910	574540	1058600	1519400	979990
sp|P19961|AMY2B_HUMAN;sp|P04746|AMYP_HUMAN;sp|P04745|AMY1_HUMAN;CON__Q3MHH8	AMY2B	sp|P19961|AMY2B_HUMAN Alpha-amylase 2B OS=Homo sapiens OX=9606 GN=AMY2B PE=1 SV=1;sp|P04746|AMYP_HUMAN Pancreatic alpha-amylase OS=Homo sapiens OX=9606 GN=AMY2A PE=1 SV=2;sp|P04745|AMY1_HUMAN Alpha-amylase 1 OS=Homo sapiens OX=9606 GN=AMY1A PE=1 SV=2	4	4	4	4	10.8	57.709	0	14852	266300	38218	0	57096	0	27264	0	0	0	0	0
sp|P19971|TYPH_HUMAN	TYMP	sp|P19971|TYPH_HUMAN Thymidine phosphorylase OS=Homo sapiens OX=9606 GN=TYMP PE=1 SV=2	1	1	1	1	2.9	49.955	0	0	0	0	0	0	0	0	0	0	0	7337.6	0
sp|P20020|AT2B1_HUMAN;sp|P23634|AT2B4_HUMAN;sp|Q16720|AT2B3_HUMAN;sp|Q01814|AT2B2_HUMAN	ATP2B1	sp|P20020|AT2B1_HUMAN Plasma membrane calcium-transporting ATPase 1 OS=Homo sapiens OX=9606 GN=ATP2B1 PE=1 SV=4;sp|P23634|AT2B4_HUMAN Plasma membrane calcium-transporting ATPase 4 OS=Homo sapiens OX=9606 GN=ATP2B4 PE=1 SV=2;sp|Q16720|AT2B3_HUMAN Plasma mem	4	2	2	2	2.5	134.68	0	0	0	0	0	0	0	0	0	0	8664.8	0	0
sp|P20023|CR2_HUMAN	CR2	sp|P20023|CR2_HUMAN Complement receptor type 2 OS=Homo sapiens OX=9606 GN=CR2 PE=1 SV=2	1	1	1	1	1.4	112.91	0	0	0	0	0	0	0	0	0	0	0	9946.7	0
sp|P20061|TCO1_HUMAN	TCN1	sp|P20061|TCO1_HUMAN Transcobalamin-1 OS=Homo sapiens OX=9606 GN=TCN1 PE=1 SV=2	1	7	7	7	19.6	48.206	0	815820	75037	0	0	0	0	0	0	0	83153	49876	0
sp|P20073|ANXA7_HUMAN	ANXA7	sp|P20073|ANXA7_HUMAN Annexin A7 OS=Homo sapiens OX=9606 GN=ANXA7 PE=1 SV=3	1	6	6	6	14.3	52.739	0	42925	65440	36807	0	0	42949	46998	0	73430	69152	133640	0
sp|P20160|CAP7_HUMAN	AZU1	sp|P20160|CAP7_HUMAN Azurocidin OS=Homo sapiens OX=9606 GN=AZU1 PE=1 SV=3	1	2	2	2	8.4	26.885	0	0	0	0	0	0	0	0	0	0	0	28530	0
sp|P20231|TRYB2_HUMAN;sp|Q15661|TRYB1_HUMAN;sp|Q9BZJ3|TRYD_HUMAN	TPSB2	sp|P20231|TRYB2_HUMAN Tryptase beta-2 OS=Homo sapiens OX=9606 GN=TPSB2 PE=1 SV=2;sp|Q15661|TRYB1_HUMAN Tryptase alpha/beta-1 OS=Homo sapiens OX=9606 GN=TPSAB1 PE=1 SV=1	3	3	3	3	14.9	30.515	0	0	10450	0	0	0	18211	0	0	0	41635	0	0
sp|P20591|MX1_HUMAN	MX1	sp|P20591|MX1_HUMAN Interferon-induced GTP-binding protein Mx1 OS=Homo sapiens OX=9606 GN=MX1 PE=1 SV=4	1	2	2	2	4.5	75.519	0	0	0	0	0	0	0	0	0	0	0	34208	0
sp|P20618|PSB1_HUMAN	PSMB1	sp|P20618|PSB1_HUMAN Proteasome subunit beta type-1 OS=Homo sapiens OX=9606 GN=PSMB1 PE=1 SV=2	1	4	4	4	27	26.489	0	31244	56963	0	0	0	27158	0	0	0	34360	71477	0
sp|P20742|PZP_HUMAN	PZP	sp|P20742|PZP_HUMAN Pregnancy zone protein OS=Homo sapiens OX=9606 GN=PZP PE=1 SV=4	1	7	3	3	5.9	163.86	0	0	87487	0	0	0	0	0	0	0	0	0	0
sp|P20774|MIME_HUMAN	OGN	sp|P20774|MIME_HUMAN Mimecan OS=Homo sapiens OX=9606 GN=OGN PE=1 SV=1	1	4	4	4	12.1	33.922	168000	112430	377700	1293900	40123	224370	662400	170100	101960	32327	63921	893230	2829200
sp|P20810|ICAL_HUMAN	CAST	sp|P20810|ICAL_HUMAN Calpastatin OS=Homo sapiens OX=9606 GN=CAST PE=1 SV=4	1	6	6	6	12	76.572	0	141940	241020	243580	0	0	192930	224470	0	0	187710	269230	196800
sp|P20851|C4BPB_HUMAN	C4BPB	sp|P20851|C4BPB_HUMAN C4b-binding protein beta chain OS=Homo sapiens OX=9606 GN=C4BPB PE=1 SV=1	1	3	3	3	15.1	28.357	0	19468	55636	0	0	0	24308	24960	0	0	0	0	0
sp|P20962|PTMS_HUMAN	PTMS	sp|P20962|PTMS_HUMAN Parathymosin OS=Homo sapiens OX=9606 GN=PTMS PE=1 SV=2	1	3	3	3	22.5	11.53	0	52698	74114	120120	41101	0	50619	0	0	0	56959	191750	327910
sp|P21266|GSTM3_HUMAN;sp|P46439|GSTM5_HUMAN	GSTM3	sp|P21266|GSTM3_HUMAN Glutathione S-transferase Mu 3 OS=Homo sapiens OX=9606 GN=GSTM3 PE=1 SV=3	2	7	7	6	35.6	26.559	81484	119010	97410	179350	0	59325	91228	114480	60569	0	136420	393600	91049
sp|P21281|VATB2_HUMAN	ATP6V1B2	sp|P21281|VATB2_HUMAN V-type proton ATPase subunit B, brain isoform OS=Homo sapiens OX=9606 GN=ATP6V1B2 PE=1 SV=3	1	1	1	1	2.9	56.5	0	0	0	0	0	0	0	0	0	0	0	15596	0
sp|P21291|CSRP1_HUMAN	CSRP1	sp|P21291|CSRP1_HUMAN Cysteine and glycine-rich protein 1 OS=Homo sapiens OX=9606 GN=CSRP1 PE=1 SV=3	1	7	7	7	50.3	20.567	0	52207	36652	43929	0	60989	136060	34652	0	0	52307	53131	35088
sp|P21333|FLNA_HUMAN	FLNA	sp|P21333|FLNA_HUMAN Filamin-A OS=Homo sapiens OX=9606 GN=FLNA PE=1 SV=4	1	42	42	41	22.4	280.74	0	395410	553150	631720	166820	281500	1116600	575120	0	76339	396650	903900	126820
sp|P21397|AOFA_HUMAN;sp|P27338|AOFB_HUMAN	MAOA	sp|P21397|AOFA_HUMAN Amine oxidase [flavin-containing] A OS=Homo sapiens OX=9606 GN=MAOA PE=1 SV=1;sp|P27338|AOFB_HUMAN Amine oxidase [flavin-containing] B OS=Homo sapiens OX=9606 GN=MAOB PE=1 SV=3	2	2	2	2	4	59.681	0	0	0	0	0	0	0	0	0	0	0	18045	0
sp|P21399|ACOC_HUMAN	ACO1	sp|P21399|ACOC_HUMAN Cytoplasmic aconitate hydratase OS=Homo sapiens OX=9606 GN=ACO1 PE=1 SV=3	1	5	5	5	7.6	98.398	0	51860	19769	27365	0	0	15295	10722	0	0	18016	123850	0
sp|P21589|5NTD_HUMAN	NT5E	sp|P21589|5NTD_HUMAN 5-nucleotidase OS=Homo sapiens OX=9606 GN=NT5E PE=1 SV=1	1	3	3	3	6.8	63.367	0	12154	0	0	0	0	0	0	0	0	0	0	0
sp|P21796|VDAC1_HUMAN	VDAC1	sp|P21796|VDAC1_HUMAN Voltage-dependent anion-selective channel protein 1 OS=Homo sapiens OX=9606 GN=VDAC1 PE=1 SV=2	1	3	3	3	15.5	30.772	0	40234	0	0	0	0	0	37137	0	0	55027	47489	0
sp|P21810|PGS1_HUMAN	BGN	sp|P21810|PGS1_HUMAN Biglycan OS=Homo sapiens OX=9606 GN=BGN PE=1 SV=2	1	6	5	5	18.2	41.654	102800	191720	100070	550610	0	391840	512430	29129	0	0	84979	50279	1980800
sp|P21926|CD9_HUMAN	CD9	sp|P21926|CD9_HUMAN CD9 antigen OS=Homo sapiens OX=9606 GN=CD9 PE=1 SV=4	1	1	1	1	4.4	25.416	0	0	0	0	0	0	0	0	0	0	23148	0	0
sp|P21980|TGM2_HUMAN	TGM2	sp|P21980|TGM2_HUMAN Protein-glutamine gamma-glutamyltransferase 2 OS=Homo sapiens OX=9606 GN=TGM2 PE=1 SV=2	1	10	10	10	20.2	77.328	0	128430	145790	42020	0	0	324460	38479	0	0	135860	128130	0
sp|P22061|PIMT_HUMAN	PCMT1	sp|P22061|PIMT_HUMAN Protein-L-isoaspartate(D-aspartate) O-methyltransferase OS=Homo sapiens OX=9606 GN=PCMT1 PE=1 SV=4	1	4	4	4	23.3	24.636	0	57139	0	0	82350	0	69724	79330	0	84919	67072	132030	0
sp|P22105|TENX_HUMAN	TNXB	sp|P22105|TENX_HUMAN Tenascin-X OS=Homo sapiens OX=9606 GN=TNXB PE=1 SV=5	1	2	2	2	1.9	458.38	0	0	0	0	0	0	16722	0	0	0	0	0	0
sp|P22234|PUR6_HUMAN	PAICS	sp|P22234|PUR6_HUMAN Multifunctional protein ADE2 OS=Homo sapiens OX=9606 GN=PAICS PE=1 SV=3	1	2	2	2	8	47.079	0	0	0	0	0	0	0	0	0	0	0	15729	0
sp|P22314|UBA1_HUMAN	UBA1	sp|P22314|UBA1_HUMAN Ubiquitin-like modifier-activating enzyme 1 OS=Homo sapiens OX=9606 GN=UBA1 PE=1 SV=3	1	14	14	14	18.1	117.85	49936	234470	222340	425760	97058	111250	185330	207210	0	53886	256170	655930	122770
sp|P22352|GPX3_HUMAN	GPX3	sp|P22352|GPX3_HUMAN Glutathione peroxidase 3 OS=Homo sapiens OX=9606 GN=GPX3 PE=1 SV=2	1	6	6	6	29.2	25.552	527760	6869900	563550	963140	318500	2137000	449810	206700	0	105590	2455000	599510	225660
sp|P22392|NDKB_HUMAN;sp|O60361|NDK8_HUMAN	NME2	sp|P22392|NDKB_HUMAN Nucleoside diphosphate kinase B OS=Homo sapiens OX=9606 GN=NME2 PE=1 SV=1;sp|O60361|NDK8_HUMAN Putative nucleoside diphosphate kinase OS=Homo sapiens OX=9606 GN=NME2P1 PE=5 SV=1	2	5	2	2	32.2	17.298	0	156410	149920	121620	0	0	148000	125300	0	226170	159820	288530	0
sp|P22626|ROA2_HUMAN	HNRNPA2B1	sp|P22626|ROA2_HUMAN Heterogeneous nuclear ribonucleoproteins A2/B1 OS=Homo sapiens OX=9606 GN=HNRNPA2B1 PE=1 SV=2	1	5	5	5	17	37.429	0	132600	54366	74548	138560	44674	169930	132140	0	0	127180	118450	150550
sp|P22695|QCR2_HUMAN	UQCRC2	sp|P22695|QCR2_HUMAN Cytochrome b-c1 complex subunit 2, mitochondrial OS=Homo sapiens OX=9606 GN=UQCRC2 PE=1 SV=3	1	1	1	1	3.5	48.442	0	0	0	0	0	0	0	0	0	0	0	15117	0
sp|P22735|TGM1_HUMAN	TGM1	sp|P22735|TGM1_HUMAN Protein-glutamine gamma-glutamyltransferase K OS=Homo sapiens OX=9606 GN=TGM1 PE=1 SV=4	1	2	2	2	2.7	89.786	0	0	0	0	0	0	0	0	0	57312	0	0	63389
sp|P22792|CPN2_HUMAN	CPN2	sp|P22792|CPN2_HUMAN Carboxypeptidase N subunit 2 OS=Homo sapiens OX=9606 GN=CPN2 PE=1 SV=3	1	7	7	7	16.5	60.556	0	120010	236020	99999	0	0	189200	84350	0	0	99214	77092	0
sp|P23083|HV102_HUMAN	IGHV1-2	sp|P23083|HV102_HUMAN Immunoglobulin heavy variable 1-2 OS=Homo sapiens OX=9606 GN=IGHV1-2 PE=1 SV=2	1	2	1	1	20.5	13.085	0	0	0	0	0	0	0	0	0	0	15637	0	0
sp|P23141|EST1_HUMAN;sp|Q9UKY3|CES1P_HUMAN	CES1	sp|P23141|EST1_HUMAN Liver carboxylesterase 1 OS=Homo sapiens OX=9606 GN=CES1 PE=1 SV=2	2	5	5	5	11.3	62.52	0	10701	13368	60228	0	0	15546	48216	0	0	7243.1	58538	0
sp|P23142|FBLN1_HUMAN;CON__ENSEMBL:ENSBTAP00000016046	FBLN1	sp|P23142|FBLN1_HUMAN Fibulin-1 OS=Homo sapiens OX=9606 GN=FBLN1 PE=1 SV=4	2	15	15	15	28.3	77.213	263850	827700	372780	798770	382630	356860	905390	617000	651290	94223	374700	532720	412460
sp|P23284|PPIB_HUMAN	PPIB	sp|P23284|PPIB_HUMAN Peptidyl-prolyl cis-trans isomerase B OS=Homo sapiens OX=9606 GN=PPIB PE=1 SV=2	1	3	3	3	15.3	23.742	0	66996	23533	35496	0	0	40518	17358	0	0	27642	69907	0
sp|P23297|S10A1_HUMAN	S100A1	sp|P23297|S10A1_HUMAN Protein S100-A1 OS=Homo sapiens OX=9606 GN=S100A1 PE=1 SV=2	1	1	1	1	16	10.546	0	7879.5	0	0	0	0	0	0	0	0	0	0	0
sp|P23381|SYWC_HUMAN	WARS	sp|P23381|SYWC_HUMAN Tryptophan--tRNA ligase, cytoplasmic OS=Homo sapiens OX=9606 GN=WARS PE=1 SV=2	1	4	4	4	11.7	53.165	0	34285	35899	0	0	0	33360	0	0	0	30431	59726	0
sp|P23396|RS3_HUMAN	RPS3	sp|P23396|RS3_HUMAN 40S ribosomal protein S3 OS=Homo sapiens OX=9606 GN=RPS3 PE=1 SV=2	1	3	3	3	14.4	26.688	0	13083	0	57236	0	0	13748	14450	0	0	0	13492	0
sp|P23526|SAHH_HUMAN	AHCY	sp|P23526|SAHH_HUMAN Adenosylhomocysteinase OS=Homo sapiens OX=9606 GN=AHCY PE=1 SV=4	1	9	9	9	23.1	47.716	246360	253880	387760	316450	0	98351	295980	184000	0	447800	333910	609300	108890
sp|P23528|COF1_HUMAN;sp|Q9Y281|COF2_HUMAN	CFL1	sp|P23528|COF1_HUMAN Cofilin-1 OS=Homo sapiens OX=9606 GN=CFL1 PE=1 SV=3	2	7	7	7	45.8	18.502	364730	554200	177130	384900	764580	335490	391970	384580	0	749470	436010	552250	466930
sp|P24158|PRTN3_HUMAN	PRTN3	sp|P24158|PRTN3_HUMAN Myeloblastin OS=Homo sapiens OX=9606 GN=PRTN3 PE=1 SV=3	1	1	1	1	4.7	27.807	0	0	0	0	0	0	0	0	0	0	0	24082	0
sp|P24534|EF1B_HUMAN	EEF1B2	sp|P24534|EF1B_HUMAN Elongation factor 1-beta OS=Homo sapiens OX=9606 GN=EEF1B2 PE=1 SV=3	1	2	2	2	12.4	24.763	0	0	0	0	0	0	0	0	0	0	0	32100	0
sp|P24539|AT5F1_HUMAN	ATP5PB	sp|P24539|AT5F1_HUMAN ATP synthase F(0) complex subunit B1, mitochondrial OS=Homo sapiens OX=9606 GN=ATP5PB PE=1 SV=2	1	2	2	2	7.8	28.908	0	11644	10599	15491	0	0	14860	0	0	0	0	17080	0
sp|P24592|IBP6_HUMAN	IGFBP6	sp|P24592|IBP6_HUMAN Insulin-like growth factor-binding protein 6 OS=Homo sapiens OX=9606 GN=IGFBP6 PE=1 SV=1	1	3	3	3	15.8	25.322	0	39444	0	0	0	0	0	0	553560	0	0	18288	33078
sp|P24666|PPAC_HUMAN	ACP1	sp|P24666|PPAC_HUMAN Low molecular weight phosphotyrosine protein phosphatase OS=Homo sapiens OX=9606 GN=ACP1 PE=1 SV=3	1	2	2	2	18.4	18.042	0	11585	0	0	0	0	0	0	0	0	43146	93868	0
sp|P24821|TENA_HUMAN	TNC	sp|P24821|TENA_HUMAN Tenascin OS=Homo sapiens OX=9606 GN=TNC PE=1 SV=3	1	46	46	46	32	240.85	64281	0	22266	76394	7028.5	2487200	11698	16922	0	0	278910	4745.8	0
sp|P25311|ZA2G_HUMAN	AZGP1	sp|P25311|ZA2G_HUMAN Zinc-alpha-2-glycoprotein OS=Homo sapiens OX=9606 GN=AZGP1 PE=1 SV=2	1	10	10	10	37.9	34.258	3399600	4515400	2671800	3049500	1855200	3453300	3873200	2755800	4358100	2772800	1889500	1133900	2106000
sp|P25325|THTM_HUMAN	MPST	sp|P25325|THTM_HUMAN 3-mercaptopyruvate sulfurtransferase OS=Homo sapiens OX=9606 GN=MPST PE=1 SV=3	1	3	3	3	12.1	33.178	0	0	0	0	0	0	0	0	0	0	11961	51214	0
sp|P25398|RS12_HUMAN	RPS12	sp|P25398|RS12_HUMAN 40S ribosomal protein S12 OS=Homo sapiens OX=9606 GN=RPS12 PE=1 SV=3	1	2	2	2	25	14.515	0	0	0	0	0	0	0	0	0	0	0	13893	0
sp|P25705|ATPA_HUMAN	ATP5F1A	sp|P25705|ATPA_HUMAN ATP synthase subunit alpha, mitochondrial OS=Homo sapiens OX=9606 GN=ATP5F1A PE=1 SV=1	1	7	7	7	15.9	59.75	0	95426	0	131250	0	0	58370	67571	0	0	115530	73859	160370
sp|P25786|PSA1_HUMAN	PSMA1	sp|P25786|PSA1_HUMAN Proteasome subunit alpha type-1 OS=Homo sapiens OX=9606 GN=PSMA1 PE=1 SV=1	1	6	6	6	27.4	29.555	151510	109870	133130	115460	100310	0	101520	103290	0	107420	121860	234220	0
sp|P25787|PSA2_HUMAN	PSMA2	sp|P25787|PSA2_HUMAN Proteasome subunit alpha type-2 OS=Homo sapiens OX=9606 GN=PSMA2 PE=1 SV=2	1	2	2	2	12	25.898	0	0	0	0	0	0	12832	0	0	0	0	38595	0
sp|P25788|PSA3_HUMAN	PSMA3	sp|P25788|PSA3_HUMAN Proteasome subunit alpha type-3 OS=Homo sapiens OX=9606 GN=PSMA3 PE=1 SV=2	1	6	6	6	22.4	28.433	0	84573	103470	112040	0	64833	96694	0	72354	86872	86526	160820	0
sp|P25789|PSA4_HUMAN	PSMA4	sp|P25789|PSA4_HUMAN Proteasome subunit alpha type-4 OS=Homo sapiens OX=9606 GN=PSMA4 PE=1 SV=1	1	3	3	3	13	29.483	0	44705	66972	0	0	0	41548	29958	0	57868	53959	124500	0
sp|P26038|MOES_HUMAN	MSN	sp|P26038|MOES_HUMAN Moesin OS=Homo sapiens OX=9606 GN=MSN PE=1 SV=3	1	13	13	9	19.1	67.819	191050	276710	246900	310390	241340	208280	369800	227690	0	246810	171340	642210	288170
sp|P26373|RL13_HUMAN	RPL13	sp|P26373|RL13_HUMAN 60S ribosomal protein L13 OS=Homo sapiens OX=9606 GN=RPL13 PE=1 SV=4	1	1	1	1	5.2	24.261	0	0	0	0	0	0	0	0	0	0	0	0	15255
sp|P26447|S10A4_HUMAN	S100A4	sp|P26447|S10A4_HUMAN Protein S100-A4 OS=Homo sapiens OX=9606 GN=S100A4 PE=1 SV=1	1	5	5	5	36.6	11.728	422540	411680	544680	197150	300390	247240	547270	522770	225320	888990	645410	1143800	180920
sp|P26641|EF1G_HUMAN	EEF1G	sp|P26641|EF1G_HUMAN Elongation factor 1-gamma OS=Homo sapiens OX=9606 GN=EEF1G PE=1 SV=3	1	4	4	4	11.4	50.118	0	21036	0	0	0	0	18199	0	0	0	13858	24234	0
sp|P26927|HGFL_HUMAN	MST1	sp|P26927|HGFL_HUMAN Hepatocyte growth factor-like protein OS=Homo sapiens OX=9606 GN=MST1 PE=1 SV=2	1	4	4	4	8.2	80.319	0	47740	23010	0	0	0	49189	0	0	0	0	0	0
sp|P27105|STOM_HUMAN	STOM	sp|P27105|STOM_HUMAN Erythrocyte band 7 integral membrane protein OS=Homo sapiens OX=9606 GN=STOM PE=1 SV=3	1	4	4	4	20.5	31.73	93332	212860	321270	129960	0	0	226340	71146	0	101280	447850	158730	0
sp|P27169|PON1_HUMAN	PON1	sp|P27169|PON1_HUMAN Serum paraoxonase/arylesterase 1 OS=Homo sapiens OX=9606 GN=PON1 PE=1 SV=3	1	6	6	6	19.4	39.731	0	342660	1008400	510620	88947	210350	981160	724980	215750	109780	409130	605160	135670
sp|P27348|1433T_HUMAN	YWHAQ	sp|P27348|1433T_HUMAN 14-3-3 protein theta OS=Homo sapiens OX=9606 GN=YWHAQ PE=1 SV=1	1	11	9	8	40.8	27.764	0	168140	178350	249110	109870	132400	192560	133040	0	97723	152840	561470	144720
sp|P27482|CALL3_HUMAN	CALML3	sp|P27482|CALL3_HUMAN Calmodulin-like protein 3 OS=Homo sapiens OX=9606 GN=CALML3 PE=1 SV=2	1	2	1	1	16.8	16.891	0	0	0	0	0	0	0	0	0	0	0	786.53	0
sp|P27797|CALR_HUMAN	CALR	sp|P27797|CALR_HUMAN Calreticulin OS=Homo sapiens OX=9606 GN=CALR PE=1 SV=1	1	6	6	6	19.7	48.141	0	163830	118820	252870	128650	121930	151580	140250	0	53502	124240	326910	123310
sp|P27816|MAP4_HUMAN	MAP4	sp|P27816|MAP4_HUMAN Microtubule-associated protein 4 OS=Homo sapiens OX=9606 GN=MAP4 PE=1 SV=3	1	3	3	3	3.9	121	0	20484	0	0	0	0	0	0	0	0	27356	50544	35776
sp|P27824|CALX_HUMAN	CANX	sp|P27824|CALX_HUMAN Calnexin OS=Homo sapiens OX=9606 GN=CANX PE=1 SV=2	1	4	4	4	8.4	67.567	0	30071	29510	43907	0	0	30172	21119	0	0	36010	79295	0
sp|P27918|PROP_HUMAN	CFP	sp|P27918|PROP_HUMAN Properdin OS=Homo sapiens OX=9606 GN=CFP PE=1 SV=2	1	3	3	3	9.4	51.276	0	0	28240	0	0	0	29675	0	0	0	0	0	0
sp|P28062|PSB8_HUMAN	PSMB8	sp|P28062|PSB8_HUMAN Proteasome subunit beta type-8 OS=Homo sapiens OX=9606 GN=PSMB8 PE=1 SV=3	1	2	2	2	10.1	30.354	0	5638.3	0	0	0	0	6262	0	0	0	0	27146	0
sp|P28066|PSA5_HUMAN	PSMA5	sp|P28066|PSA5_HUMAN Proteasome subunit alpha type-5 OS=Homo sapiens OX=9606 GN=PSMA5 PE=1 SV=3	1	5	5	5	29.5	26.411	110170	108510	138100	144760	0	73497	98045	105190	0	132040	125370	272130	0
sp|P28070|PSB4_HUMAN	PSMB4	sp|P28070|PSB4_HUMAN Proteasome subunit beta type-4 OS=Homo sapiens OX=9606 GN=PSMB4 PE=1 SV=4	1	4	4	4	20.5	29.204	0	35406	47304	31578	0	0	0	0	0	0	52944	177500	0
sp|P28074|PSB5_HUMAN	PSMB5	sp|P28074|PSB5_HUMAN Proteasome subunit beta type-5 OS=Homo sapiens OX=9606 GN=PSMB5 PE=1 SV=3	1	5	5	5	23.6	28.48	117520	56548	160160	93349	61523	0	74889	82592	0	209780	101960	181050	73368
sp|P28161|GSTM2_HUMAN;sp|Q03013|GSTM4_HUMAN;sp|P09488|GSTM1_HUMAN	GSTM2	sp|P28161|GSTM2_HUMAN Glutathione S-transferase Mu 2 OS=Homo sapiens OX=9606 GN=GSTM2 PE=1 SV=2;sp|Q03013|GSTM4_HUMAN Glutathione S-transferase Mu 4 OS=Homo sapiens OX=9606 GN=GSTM4 PE=1 SV=3;sp|P09488|GSTM1_HUMAN Glutathione S-transferase Mu 1 OS=Homo sap	3	4	3	3	22.9	25.744	0	14437	9190	11078	0	0	0	0	0	0	0	79899	0
sp|P28289|TMOD1_HUMAN;sp|Q9NZQ9|TMOD4_HUMAN	TMOD1	sp|P28289|TMOD1_HUMAN Tropomodulin-1 OS=Homo sapiens OX=9606 GN=TMOD1 PE=1 SV=1	2	7	7	7	18.9	40.569	0	34086	87114	46874	0	0	66168	52508	0	120440	63508	80720	0
sp|P28838|AMPL_HUMAN	LAP3	sp|P28838|AMPL_HUMAN Cytosol aminopeptidase OS=Homo sapiens OX=9606 GN=LAP3 PE=1 SV=3	1	10	10	10	26.2	56.166	0	72244	33162	231250	0	0	118730	42429	0	0	112090	219130	0
sp|P29144|TPP2_HUMAN	TPP2	sp|P29144|TPP2_HUMAN Tripeptidyl-peptidase 2 OS=Homo sapiens OX=9606 GN=TPP2 PE=1 SV=4	1	2	2	2	2	138.35	0	0	0	0	0	0	0	0	0	15367	12821	17964	0
sp|P29218|IMPA1_HUMAN	IMPA1	sp|P29218|IMPA1_HUMAN Inositol monophosphatase 1 OS=Homo sapiens OX=9606 GN=IMPA1 PE=1 SV=1	1	1	1	1	4	30.188	0	0	0	0	0	0	0	0	0	0	0	5355.4	0
sp|P29373|RABP2_HUMAN	CRABP2	sp|P29373|RABP2_HUMAN Cellular retinoic acid-binding protein 2 OS=Homo sapiens OX=9606 GN=CRABP2 PE=1 SV=2	1	2	2	2	11.6	15.693	0	18425	0	0	0	0	0	16550	0	0	0	15464	0
sp|P29401|TKT_HUMAN	TKT	sp|P29401|TKT_HUMAN Transketolase OS=Homo sapiens OX=9606 GN=TKT PE=1 SV=3	1	11	11	10	23.6	67.877	239290	176590	185630	283980	150480	213620	282340	186080	0	360430	283460	644860	151070
sp|P29622|KAIN_HUMAN	SERPINA4	sp|P29622|KAIN_HUMAN Kallistatin OS=Homo sapiens OX=9606 GN=SERPINA4 PE=1 SV=3	1	10	10	10	27.4	48.541	0	488010	213530	71502	0	0	557350	203590	0	0	152450	150100	0
sp|P29762|RABP1_HUMAN	CRABP1	sp|P29762|RABP1_HUMAN Cellular retinoic acid-binding protein 1 OS=Homo sapiens OX=9606 GN=CRABP1 PE=1 SV=2	1	3	3	3	27	15.565	0	15083	0	0	0	0	0	0	0	0	26048	72454	0
sp|P29966|MARCS_HUMAN	MARCKS	sp|P29966|MARCS_HUMAN Myristoylated alanine-rich C-kinase substrate OS=Homo sapiens OX=9606 GN=MARCKS PE=1 SV=4	1	3	3	3	16.3	31.554	0	22076	103090	33856	0	17628	31463	0	0	0	21690	84618	151080
sp|P30040|ERP29_HUMAN	ERP29	sp|P30040|ERP29_HUMAN Endoplasmic reticulum resident protein 29 OS=Homo sapiens OX=9606 GN=ERP29 PE=1 SV=4	1	3	3	3	12.3	28.993	0	15440	0	0	0	0	0	0	0	0	0	24462	0
sp|P30041|PRDX6_HUMAN	PRDX6	sp|P30041|PRDX6_HUMAN Peroxiredoxin-6 OS=Homo sapiens OX=9606 GN=PRDX6 PE=1 SV=3	1	11	11	11	53.1	25.035	1227700	1309000	1536300	805130	509860	446980	1426500	1258200	505270	2033500	1196000	2123400	484260
sp|P30043|BLVRB_HUMAN	BLVRB	sp|P30043|BLVRB_HUMAN Flavin reductase (NADPH) OS=Homo sapiens OX=9606 GN=BLVRB PE=1 SV=3	1	6	6	6	39.8	22.119	2166300	2782700	2410700	803290	1405200	850610	2154800	2744300	596660	4244700	2619200	6274600	858520
sp|P30044|PRDX5_HUMAN	PRDX5	sp|P30044|PRDX5_HUMAN Peroxiredoxin-5, mitochondrial OS=Homo sapiens OX=9606 GN=PRDX5 PE=1 SV=4	1	3	3	3	20.1	22.086	0	160850	0	0	0	0	71018	0	0	0	77805	121430	0
sp|P30046|DOPD_HUMAN;sp|A6NHG4|DDTL_HUMAN	DDT	sp|P30046|DOPD_HUMAN D-dopachrome decarboxylase OS=Homo sapiens OX=9606 GN=DDT PE=1 SV=3;sp|A6NHG4|DDTL_HUMAN D-dopachrome decarboxylase-like protein OS=Homo sapiens OX=9606 GN=DDTL PE=2 SV=1	2	4	4	4	37.3	12.712	115120	175620	134000	119400	0	104940	293840	180110	0	0	154800	269980	0
sp|P30049|ATPD_HUMAN	ATP5F1D	sp|P30049|ATPD_HUMAN ATP synthase subunit delta, mitochondrial OS=Homo sapiens OX=9606 GN=ATP5F1D PE=1 SV=2	1	2	2	2	13.7	17.49	0	29542	31339	0	0	0	34503	33959	0	0	35577	38126	0
sp|P30050|RL12_HUMAN	RPL12	sp|P30050|RL12_HUMAN 60S ribosomal protein L12 OS=Homo sapiens OX=9606 GN=RPL12 PE=1 SV=1	1	1	1	1	9.7	17.818	0	0	0	0	0	0	0	0	0	0	0	10079	0
sp|P30085|KCY_HUMAN	CMPK1	sp|P30085|KCY_HUMAN UMP-CMP kinase OS=Homo sapiens OX=9606 GN=CMPK1 PE=1 SV=3	1	2	2	2	13.3	22.222	0	40297	0	0	0	0	11374	13607	0	0	12718	16565	0
sp|P30086|PEBP1_HUMAN	PEBP1	sp|P30086|PEBP1_HUMAN Phosphatidylethanolamine-binding protein 1 OS=Homo sapiens OX=9606 GN=PEBP1 PE=1 SV=3	1	10	10	10	62	21.057	1361400	998000	542810	537560	1816300	716820	885980	626480	454540	681980	757250	1854800	1058000
sp|P30101|PDIA3_HUMAN	PDIA3	sp|P30101|PDIA3_HUMAN Protein disulfide-isomerase A3 OS=Homo sapiens OX=9606 GN=PDIA3 PE=1 SV=4	1	12	12	12	28.7	56.782	195080	267480	233500	536610	377280	153230	321130	298370	0	56425	281820	774570	228100
sp|P30153|2AAA_HUMAN	PPP2R1A	sp|P30153|2AAA_HUMAN Serine/threonine-protein phosphatase 2A 65 kDa regulatory subunit A alpha isoform OS=Homo sapiens OX=9606 GN=PPP2R1A PE=1 SV=4	1	4	4	4	9.2	65.308	0	25179	18501	0	0	0	26915	0	0	0	19244	41992	0
sp|P30613|KPYR_HUMAN	PKLR	sp|P30613|KPYR_HUMAN Pyruvate kinase PKLR OS=Homo sapiens OX=9606 GN=PKLR PE=1 SV=2	1	4	3	3	8.5	61.829	0	17368	22740	0	0	0	25997	20474	0	0	26679	35553	0
sp|P30626|SORCN_HUMAN	SRI	sp|P30626|SORCN_HUMAN Sorcin OS=Homo sapiens OX=9606 GN=SRI PE=1 SV=1	1	2	2	2	10.1	21.676	0	13081	8777.5	0	0	0	10537	0	0	0	0	44556	0
sp|P30711|GSTT1_HUMAN	GSTT1	sp|P30711|GSTT1_HUMAN Glutathione S-transferase theta-1 OS=Homo sapiens OX=9606 GN=GSTT1 PE=1 SV=4	1	2	2	2	11.7	27.335	0	27501	0	0	0	0	0	0	0	0	0	0	0
sp|P30740|ILEU_HUMAN	SERPINB1	sp|P30740|ILEU_HUMAN Leukocyte elastase inhibitor OS=Homo sapiens OX=9606 GN=SERPINB1 PE=1 SV=1	1	10	10	10	33	42.741	0	90642	54494	38513	0	0	125730	71552	0	37417	80856	399310	0
sp|P31146|COR1A_HUMAN	CORO1A	sp|P31146|COR1A_HUMAN Coronin-1A OS=Homo sapiens OX=9606 GN=CORO1A PE=1 SV=4	1	5	5	5	13.4	51.026	0	19538	19602	24131	0	0	50564	8415.9	0	14786	19425	106200	0
sp|P31150|GDIA_HUMAN	GDI1	sp|P31150|GDIA_HUMAN Rab GDP dissociation inhibitor alpha OS=Homo sapiens OX=9606 GN=GDI1 PE=1 SV=2	1	8	5	5	22.4	50.582	0	45399	58982	73002	0	0	51297	39343	0	0	41597	158750	32119
sp|P31151|S10A7_HUMAN	S100A7	sp|P31151|S10A7_HUMAN Protein S100-A7 OS=Homo sapiens OX=9606 GN=S100A7 PE=1 SV=4	1	5	5	3	24.8	11.471	0	6308.9	0	17070	0	0	10381	1363200	0	18873	0	8145.6	0
sp|P31153|METK2_HUMAN	MAT2A	sp|P31153|METK2_HUMAN S-adenosylmethionine synthase isoform type-2 OS=Homo sapiens OX=9606 GN=MAT2A PE=1 SV=1	1	3	3	3	10.4	43.66	0	9744.4	12237	0	0	0	6958.6	0	0	0	0	66050	0
sp|P31327|CPSM_HUMAN	CPS1	sp|P31327|CPSM_HUMAN Carbamoyl-phosphate synthase [ammonia], mitochondrial OS=Homo sapiens OX=9606 GN=CPS1 PE=1 SV=2	1	2	2	2	1.3	164.94	0	0	0	0	0	0	0	0	0	0	0	0	209110
sp|P31937|3HIDH_HUMAN	HIBADH	sp|P31937|3HIDH_HUMAN 3-hydroxyisobutyrate dehydrogenase, mitochondrial OS=Homo sapiens OX=9606 GN=HIBADH PE=1 SV=2	1	2	2	2	9.2	35.329	0	0	0	0	0	0	0	0	0	0	0	18306	0
sp|P31939|PUR9_HUMAN	ATIC	sp|P31939|PUR9_HUMAN Bifunctional purine biosynthesis protein PURH OS=Homo sapiens OX=9606 GN=ATIC PE=1 SV=3	1	4	4	4	9.8	64.615	0	33777	0	26438	0	0	41492	0	0	0	28520	48423	0
sp|P31944|CASPE_HUMAN	CASP14	sp|P31944|CASPE_HUMAN Caspase-14 OS=Homo sapiens OX=9606 GN=CASP14 PE=1 SV=2	1	4	4	4	18.6	27.679	0	0	190830	26349	409140	37431	8360.9	42536	0	17872	22668	19241	254160
sp|P31946|1433B_HUMAN	YWHAB	sp|P31946|1433B_HUMAN 14-3-3 protein beta/alpha OS=Homo sapiens OX=9606 GN=YWHAB PE=1 SV=3	1	8	5	4	37.4	28.082	184770	350650	356600	559520	345440	274960	332500	353240	182700	183910	336980	703660	274380
sp|P31947|1433S_HUMAN	SFN	sp|P31947|1433S_HUMAN 14-3-3 protein sigma OS=Homo sapiens OX=9606 GN=SFN PE=1 SV=1	1	6	4	4	25	27.774	0	0	49007	10455	0	44192	0	783850	0	0	11071	37665	37353
sp|P31948|STIP1_HUMAN	STIP1	sp|P31948|STIP1_HUMAN Stress-induced-phosphoprotein 1 OS=Homo sapiens OX=9606 GN=STIP1 PE=1 SV=1	1	8	8	8	19	62.639	38586	143180	13969	37850	45852	0	44799	31435	0	0	45276	202940	0
sp|P31949|S10AB_HUMAN	S100A11	sp|P31949|S10AB_HUMAN Protein S100-A11 OS=Homo sapiens OX=9606 GN=S100A11 PE=1 SV=2	1	2	2	2	19	11.74	0	66701	0	0	0	0	65682	0	0	0	0	0	0
sp|P32119|PRDX2_HUMAN	PRDX2	sp|P32119|PRDX2_HUMAN Peroxiredoxin-2 OS=Homo sapiens OX=9606 GN=PRDX2 PE=1 SV=5	1	13	13	12	54.5	21.892	8311800	5894600	7849600	3190600	12861000	3943400	7424600	9457900	6658400	24120000	8999700	16268000	6151400
sp|P34096|RNAS4_HUMAN	RNASE4	sp|P34096|RNAS4_HUMAN Ribonuclease 4 OS=Homo sapiens OX=9606 GN=RNASE4 PE=1 SV=3	1	4	4	4	34	16.84	0	311290	13251	13308	0	27026	0	0	0	0	14155	12444	0
sp|P34932|HSP74_HUMAN;sp|O95757|HS74L_HUMAN;sp|Q92598|HS105_HUMAN	HSPA4	sp|P34932|HSP74_HUMAN Heat shock 70 kDa protein 4 OS=Homo sapiens OX=9606 GN=HSPA4 PE=1 SV=4	3	11	11	11	19.5	94.33	0	54130	69548	90765	0	0	33966	0	0	24076	48357	222120	0
sp|P35052|GPC1_HUMAN	GPC1	sp|P35052|GPC1_HUMAN Glypican-1 OS=Homo sapiens OX=9606 GN=GPC1 PE=1 SV=2	1	2	2	2	4.7	61.68	0	28846	0	0	0	0	0	0	0	0	0	0	0
sp|P35221|CTNA1_HUMAN;sp|P26232|CTNA2_HUMAN	CTNNA1	sp|P35221|CTNA1_HUMAN Catenin alpha-1 OS=Homo sapiens OX=9606 GN=CTNNA1 PE=1 SV=1;sp|P26232|CTNA2_HUMAN Catenin alpha-2 OS=Homo sapiens OX=9606 GN=CTNNA2 PE=1 SV=5	2	2	2	2	2.5	100.07	0	0	0	20370	0	0	0	0	0	0	0	0	0
sp|P35237|SPB6_HUMAN	SERPINB6	sp|P35237|SPB6_HUMAN Serpin B6 OS=Homo sapiens OX=9606 GN=SERPINB6 PE=1 SV=3	1	6	6	6	22.1	42.621	0	58485	21262	0	0	0	29981	0	0	0	0	116740	0
sp|P35241|RADI_HUMAN	RDX	sp|P35241|RADI_HUMAN Radixin OS=Homo sapiens OX=9606 GN=RDX PE=1 SV=1	1	5	1	1	8.9	68.563	0	0	0	0	0	0	0	0	0	0	0	13126	0
sp|P35542|SAA4_HUMAN	SAA4	sp|P35542|SAA4_HUMAN Serum amyloid A-4 protein OS=Homo sapiens OX=9606 GN=SAA4 PE=1 SV=2	1	4	4	4	32.3	14.746	0	282790	1157500	204140	0	0	1381900	616390	0	0	203480	333930	0
sp|P35555|FBN1_HUMAN	FBN1	sp|P35555|FBN1_HUMAN Fibrillin-1 OS=Homo sapiens OX=9606 GN=FBN1 PE=1 SV=4	1	7	7	7	3.3	312.3	0	82920	0	0	0	0	12371	0	0	0	0	0	0
sp|P35579|MYH9_HUMAN;sp|P35749|MYH11_HUMAN	MYH9	sp|P35579|MYH9_HUMAN Myosin-9 OS=Homo sapiens OX=9606 GN=MYH9 PE=1 SV=4	2	40	40	32	21.7	226.53	113590	336230	333980	675010	283160	314880	299520	291220	0	160680	393140	1257500	367520
sp|P35580|MYH10_HUMAN	MYH10	sp|P35580|MYH10_HUMAN Myosin-10 OS=Homo sapiens OX=9606 GN=MYH10 PE=1 SV=3	1	22	16	16	12.5	229	0	59929	27816	117690	0	47810	33309	0	0	0	21634	150070	0
sp|P35611|ADDA_HUMAN	ADD1	sp|P35611|ADDA_HUMAN Alpha-adducin OS=Homo sapiens OX=9606 GN=ADD1 PE=1 SV=2	1	9	9	9	16.8	80.954	0	110780	163980	91976	0	0	109920	79864	0	101970	145270	193780	60820
sp|P35612|ADDB_HUMAN	ADD2	sp|P35612|ADDB_HUMAN Beta-adducin OS=Homo sapiens OX=9606 GN=ADD2 PE=1 SV=3	1	8	8	8	13.6	80.853	0	78848	122910	47299	0	0	75445	56374	0	89812	87757	142890	0
sp|P35625|TIMP3_HUMAN	TIMP3	sp|P35625|TIMP3_HUMAN Metalloproteinase inhibitor 3 OS=Homo sapiens OX=9606 GN=TIMP3 PE=1 SV=2	1	8	8	8	41.2	24.145	0	1019100	11607	7331.1	0	28241	18538	0	0	0	12979	0	0
sp|P35813|PPM1A_HUMAN;sp|O75688|PPM1B_HUMAN	PPM1A	sp|P35813|PPM1A_HUMAN Protein phosphatase 1A OS=Homo sapiens OX=9606 GN=PPM1A PE=1 SV=1;sp|O75688|PPM1B_HUMAN Protein phosphatase 1B OS=Homo sapiens OX=9606 GN=PPM1B PE=1 SV=1	2	1	1	1	3.1	42.447	0	0	0	0	0	0	0	0	0	0	0	11719	0
sp|P35858|ALS_HUMAN	IGFALS	sp|P35858|ALS_HUMAN Insulin-like growth factor-binding protein complex acid labile subunit OS=Homo sapiens OX=9606 GN=IGFALS PE=1 SV=1	1	12	12	12	23.6	66.034	0	308360	151340	62870	0	0	136230	0	0	0	58193	56168	0
sp|P35998|PRS7_HUMAN	PSMC2	sp|P35998|PRS7_HUMAN 26S proteasome regulatory subunit 7 OS=Homo sapiens OX=9606 GN=PSMC2 PE=1 SV=3	1	2	2	2	6	48.633	0	18901	0	21848	0	0	0	0	0	0	0	21477	0
sp|P36222|CH3L1_HUMAN	CHI3L1	sp|P36222|CH3L1_HUMAN Chitinase-3-like protein 1 OS=Homo sapiens OX=9606 GN=CHI3L1 PE=1 SV=2	1	13	13	13	43.9	42.625	271490	3822400	61310	27174	0	477850	101380	104040	0	15406	504740	22185	0
sp|P36871|PGM1_HUMAN	PGM1	sp|P36871|PGM1_HUMAN Phosphoglucomutase-1 OS=Homo sapiens OX=9606 GN=PGM1 PE=1 SV=3	1	11	11	11	26.2	61.448	33009	270220	107240	267200	0	0	292990	28271	0	14044	170520	362150	19452
sp|P36955|PEDF_HUMAN;CON__Q95121	SERPINF1	sp|P36955|PEDF_HUMAN Pigment epithelium-derived factor OS=Homo sapiens OX=9606 GN=SERPINF1 PE=1 SV=4	2	10	10	10	24.9	46.312	135270	1895100	456460	519530	0	811620	971100	301340	1057400	198960	689200	320860	290230
sp|P36959|GMPR1_HUMAN	GMPR	sp|P36959|GMPR1_HUMAN GMP reductase 1 OS=Homo sapiens OX=9606 GN=GMPR PE=1 SV=1	1	3	3	3	12.2	37.418	0	24729	25328	0	0	0	25887	0	0	0	0	52243	0
sp|P36969|GPX4_HUMAN	GPX4	sp|P36969|GPX4_HUMAN Phospholipid hydroperoxide glutathione peroxidase OS=Homo sapiens OX=9606 GN=GPX4 PE=1 SV=3	1	2	2	2	13.2	22.174	0	0	0	0	0	0	9269	0	0	0	0	24597	0
sp|P36980|FHR2_HUMAN	CFHR2	sp|P36980|FHR2_HUMAN Complement factor H-related protein 2 OS=Homo sapiens OX=9606 GN=CFHR2 PE=1 SV=1	1	4	2	2	17.4	30.65	0	2828.2	0	16788	0	0	158070	90790	0	0	11344	0	0
sp|P37802|TAGL2_HUMAN	TAGLN2	sp|P37802|TAGL2_HUMAN Transgelin-2 OS=Homo sapiens OX=9606 GN=TAGLN2 PE=1 SV=3	1	2	2	2	11.6	22.391	0	102960	0	0	0	0	0	46890	0	0	28933	114990	0
sp|P37837|TALDO_HUMAN	TALDO1	sp|P37837|TALDO_HUMAN Transaldolase OS=Homo sapiens OX=9606 GN=TALDO1 PE=1 SV=2	1	11	11	11	34.7	37.54	694350	523350	392840	353290	0	212720	512370	503570	0	363350	489050	1359600	199040
sp|P37840|SYUA_HUMAN	SNCA	sp|P37840|SYUA_HUMAN Alpha-synuclein OS=Homo sapiens OX=9606 GN=SNCA PE=1 SV=1	1	4	4	4	36.4	14.46	0	329000	89688	73028	0	0	243390	309600	0	158980	215970	482800	0
sp|P38606|VATA_HUMAN	ATP6V1A	sp|P38606|VATA_HUMAN V-type proton ATPase catalytic subunit A OS=Homo sapiens OX=9606 GN=ATP6V1A PE=1 SV=2	1	4	4	4	8.8	68.303	0	25136	0	0	0	0	13338	0	0	0	0	49603	0
sp|P38646|GRP75_HUMAN	HSPA9	sp|P38646|GRP75_HUMAN Stress-70 protein, mitochondrial OS=Homo sapiens OX=9606 GN=HSPA9 PE=1 SV=2	1	4	4	4	8.7	73.68	0	20387	0	0	0	0	25357	28547	0	0	26159	43238	0
sp|P39060|COIA1_HUMAN	COL18A1	sp|P39060|COIA1_HUMAN Collagen alpha-1(XVIII) chain OS=Homo sapiens OX=9606 GN=COL18A1 PE=1 SV=5	1	2	2	2	1.5	178.19	0	65366	0	0	0	0	0	0	0	0	0	0	0
sp|P39687|AN32A_HUMAN	ANP32A	sp|P39687|AN32A_HUMAN Acidic leucine-rich nuclear phosphoprotein 32 family member A OS=Homo sapiens OX=9606 GN=ANP32A PE=1 SV=1	1	2	2	2	6.4	28.585	0	0	27416	0	0	0	0	0	0	0	19447	21745	0
sp|P40121|CAPG_HUMAN	CAPG	sp|P40121|CAPG_HUMAN Macrophage-capping protein OS=Homo sapiens OX=9606 GN=CAPG PE=1 SV=2	1	4	4	4	14.1	38.498	0	107650	23235	85696	152730	43355	63998	75459	0	0	66733	142130	85071
sp|P40227|TCPZ_HUMAN;sp|Q92526|TCPW_HUMAN	CCT6A	sp|P40227|TCPZ_HUMAN T-complex protein 1 subunit zeta OS=Homo sapiens OX=9606 GN=CCT6A PE=1 SV=3	2	5	5	5	13	58.024	0	50902	20687	0	0	0	25500	0	0	0	0	35407	0
sp|P40925|MDHC_HUMAN	MDH1	sp|P40925|MDHC_HUMAN Malate dehydrogenase, cytoplasmic OS=Homo sapiens OX=9606 GN=MDH1 PE=1 SV=4	1	6	6	6	23.7	36.426	190720	311100	343550	356650	0	60010	375390	126550	0	212060	321700	762460	193370
sp|P40926|MDHM_HUMAN	MDH2	sp|P40926|MDHM_HUMAN Malate dehydrogenase, mitochondrial OS=Homo sapiens OX=9606 GN=MDH2 PE=1 SV=3	1	5	5	5	18.3	35.503	0	46156	0	77510	0	0	107450	82757	0	0	73530	69123	0
sp|P41222|PTGDS_HUMAN	PTGDS	sp|P41222|PTGDS_HUMAN Prostaglandin-H2 D-isomerase OS=Homo sapiens OX=9606 GN=PTGDS PE=1 SV=1	1	2	2	2	17.4	21.029	0	778450	710710	0	0	0	2243100	182340	0	0	767610	488060	0
sp|P43034|LIS1_HUMAN	PAFAH1B1	sp|P43034|LIS1_HUMAN Platelet-activating factor acetylhydrolase IB subunit alpha OS=Homo sapiens OX=9606 GN=PAFAH1B1 PE=1 SV=2	1	5	5	5	18.3	46.637	0	54385	28636	32515	0	0	43632	39177	0	44907	48340	102600	0
sp|P43251|BTD_HUMAN	BTD	sp|P43251|BTD_HUMAN Biotinidase OS=Homo sapiens OX=9606 GN=BTD PE=1 SV=2	1	5	5	5	10.5	61.132	0	226760	87644	91072	0	0	121760	55728	0	0	43126	43133	0
sp|P43487|RANG_HUMAN	RANBP1	sp|P43487|RANG_HUMAN Ran-specific GTPase-activating protein OS=Homo sapiens OX=9606 GN=RANBP1 PE=1 SV=1	1	2	2	2	10.9	23.31	0	24787	0	0	0	0	0	0	0	0	0	38859	0
sp|P43652|AFAM_HUMAN	AFM	sp|P43652|AFAM_HUMAN Afamin OS=Homo sapiens OX=9606 GN=AFM PE=1 SV=1	1	13	13	13	24	69.068	965410	1206500	1676000	1845700	411620	732240	2098300	1663900	1576400	612590	1183300	919420	1444000
sp|P45880|VDAC2_HUMAN	VDAC2	sp|P45880|VDAC2_HUMAN Voltage-dependent anion-selective channel protein 2 OS=Homo sapiens OX=9606 GN=VDAC2 PE=1 SV=2	1	1	1	1	6.5	31.566	0	0	0	0	0	0	0	0	0	0	0	11429	0
sp|P45974|UBP5_HUMAN	USP5	sp|P45974|UBP5_HUMAN Ubiquitin carboxyl-terminal hydrolase 5 OS=Homo sapiens OX=9606 GN=USP5 PE=1 SV=2	1	7	7	7	11.7	95.785	0	49227	83338	41579	0	0	35401	24750	0	0	37738	193620	0
sp|P46109|CRKL_HUMAN	CRKL	sp|P46109|CRKL_HUMAN Crk-like protein OS=Homo sapiens OX=9606 GN=CRKL PE=1 SV=1	1	1	1	1	5.9	33.777	0	0	0	0	0	0	0	0	0	0	0	5794.9	0
sp|P46940|IQGA1_HUMAN;sp|Q13576|IQGA2_HUMAN;sp|Q86VI3|IQGA3_HUMAN	IQGAP1	sp|P46940|IQGA1_HUMAN Ras GTPase-activating-like protein IQGAP1 OS=Homo sapiens OX=9606 GN=IQGAP1 PE=1 SV=1	3	9	9	9	7.7	189.25	0	26885	0	53527	0	0	44259	0	0	0	0	72701	0
sp|P46976|GLYG_HUMAN	GYG1	sp|P46976|GLYG_HUMAN Glycogenin-1 OS=Homo sapiens OX=9606 GN=GYG1 PE=1 SV=4	1	1	1	1	4	39.383	0	0	0	0	0	0	0	0	0	0	0	35245	0
sp|P47755|CAZA2_HUMAN	CAPZA2	sp|P47755|CAZA2_HUMAN F-actin-capping protein subunit alpha-2 OS=Homo sapiens OX=9606 GN=CAPZA2 PE=1 SV=3	1	3	1	1	14.7	32.949	0	0	0	0	0	0	0	0	0	0	0	14238	0
sp|P47756|CAPZB_HUMAN	CAPZB	sp|P47756|CAPZB_HUMAN F-actin-capping protein subunit beta OS=Homo sapiens OX=9606 GN=CAPZB PE=1 SV=4	1	6	6	6	27.1	31.35	0	51632	45305	0	0	0	53286	43786	0	31276	95517	164890	41958
sp|P47893|OR3A2_HUMAN;sp|P47888|OR3A3_HUMAN	OR3A2	sp|P47893|OR3A2_HUMAN Olfactory receptor 3A2 OS=Homo sapiens OX=9606 GN=OR3A2 PE=2 SV=3;sp|P47888|OR3A3_HUMAN Olfactory receptor 3A3 OS=Homo sapiens OX=9606 GN=OR3A3 PE=2 SV=3	2	1	1	1	4.7	35.206	0	0	0	0	0	0	0	0	0	0	0	0	274550
sp|P47929|LEG7_HUMAN	LGALS7	sp|P47929|LEG7_HUMAN Galectin-7 OS=Homo sapiens OX=9606 GN=LGALS7 PE=1 SV=2	1	4	4	4	33.1	15.075	0	0	23008	26978	111120	39810	10704	1290100	0	43682	0	24331	49853
sp|P48426|PI42A_HUMAN	PIP4K2A	sp|P48426|PI42A_HUMAN Phosphatidylinositol 5-phosphate 4-kinase type-2 alpha OS=Homo sapiens OX=9606 GN=PIP4K2A PE=1 SV=2	1	1	1	1	3.7	46.224	0	0	0	0	0	0	0	0	0	0	0	15644	0
sp|P48506|GSH1_HUMAN	GCLC	sp|P48506|GSH1_HUMAN Glutamate--cysteine ligase catalytic subunit OS=Homo sapiens OX=9606 GN=GCLC PE=1 SV=2	1	11	11	11	19.6	72.765	0	71028	146380	73049	0	0	112580	81226	0	115460	154410	299820	0
sp|P48507|GSH0_HUMAN	GCLM	sp|P48507|GSH0_HUMAN Glutamate--cysteine ligase regulatory subunit OS=Homo sapiens OX=9606 GN=GCLM PE=1 SV=1	1	4	4	4	20.1	30.727	0	40393	39883	0	0	0	0	0	0	0	28031	58183	0
sp|P48594|SPB4_HUMAN	SERPINB4	sp|P48594|SPB4_HUMAN Serpin B4 OS=Homo sapiens OX=9606 GN=SERPINB4 PE=1 SV=2	1	2	2	1	6.2	44.853	0	0	0	0	0	0	0	48350	0	0	0	0	0
sp|P48637|GSHB_HUMAN	GSS	sp|P48637|GSHB_HUMAN Glutathione synthetase OS=Homo sapiens OX=9606 GN=GSS PE=1 SV=1	1	4	4	4	7.4	52.384	0	32255	38795	52180	0	0	29301	39815	0	51488	35825	58245	33272
sp|P48643|TCPE_HUMAN	CCT5	sp|P48643|TCPE_HUMAN T-complex protein 1 subunit epsilon OS=Homo sapiens OX=9606 GN=CCT5 PE=1 SV=1	1	2	2	2	5.2	59.67	0	0	0	0	0	0	0	0	0	0	0	11605	0
sp|P48735|IDHP_HUMAN	IDH2	sp|P48735|IDHP_HUMAN Isocitrate dehydrogenase [NADP], mitochondrial OS=Homo sapiens OX=9606 GN=IDH2 PE=1 SV=2	1	1	1	1	2.9	50.909	0	0	0	0	0	0	0	0	0	0	0	0	16307
sp|P49006|MRP_HUMAN	MARCKSL1	sp|P49006|MRP_HUMAN MARCKS-related protein OS=Homo sapiens OX=9606 GN=MARCKSL1 PE=1 SV=2	1	1	1	1	6.7	19.529	0	0	0	0	0	0	0	0	0	0	0	0	27023
sp|P49189|AL9A1_HUMAN	ALDH9A1	sp|P49189|AL9A1_HUMAN 4-trimethylaminobutyraldehyde dehydrogenase OS=Homo sapiens OX=9606 GN=ALDH9A1 PE=1 SV=3	1	6	6	6	14.4	53.801	0	0	44691	0	0	0	58570	0	0	58074	40469	140390	69585
sp|P49247|RPIA_HUMAN	RPIA	sp|P49247|RPIA_HUMAN Ribose-5-phosphate isomerase OS=Homo sapiens OX=9606 GN=RPIA PE=1 SV=3	1	2	2	2	10.3	33.269	0	35534	71891	0	0	0	37846	26357	0	0	21997	82028	0
sp|P49368|TCPG_HUMAN	CCT3	sp|P49368|TCPG_HUMAN T-complex protein 1 subunit gamma OS=Homo sapiens OX=9606 GN=CCT3 PE=1 SV=4	1	3	3	3	6.2	60.533	0	31459	37711	21251	0	0	0	0	0	0	30830	27084	0
sp|P49419|AL7A1_HUMAN	ALDH7A1	sp|P49419|AL7A1_HUMAN Alpha-aminoadipic semialdehyde dehydrogenase OS=Homo sapiens OX=9606 GN=ALDH7A1 PE=1 SV=5	1	2	2	2	5.8	58.486	0	4786.6	0	0	0	0	0	0	0	0	0	68197	0
sp|P49588|SYAC_HUMAN	AARS	sp|P49588|SYAC_HUMAN Alanine--tRNA ligase, cytoplasmic OS=Homo sapiens OX=9606 GN=AARS PE=1 SV=2	1	2	2	2	2.8	106.81	0	0	0	0	0	0	13430	0	0	0	0	0	0
sp|P49720|PSB3_HUMAN	PSMB3	sp|P49720|PSB3_HUMAN Proteasome subunit beta type-3 OS=Homo sapiens OX=9606 GN=PSMB3 PE=1 SV=2	1	1	1	1	7.8	22.949	0	0	0	0	0	0	0	0	0	0	0	19676	0
sp|P49747|COMP_HUMAN	COMP	sp|P49747|COMP_HUMAN Cartilage oligomeric matrix protein OS=Homo sapiens OX=9606 GN=COMP PE=1 SV=2	1	1	1	1	2.1	82.86	0	0	0	0	0	0	7838.1	0	0	0	0	0	0
sp|P49773|HINT1_HUMAN	HINT1	sp|P49773|HINT1_HUMAN Histidine triad nucleotide-binding protein 1 OS=Homo sapiens OX=9606 GN=HINT1 PE=1 SV=2	1	2	2	2	26.2	13.802	0	61415	0	0	0	0	0	0	0	0	0	0	0
sp|P49788|TIG1_HUMAN	RARRES1	sp|P49788|TIG1_HUMAN Retinoic acid receptor responder protein 1 OS=Homo sapiens OX=9606 GN=RARRES1 PE=1 SV=2	1	11	11	11	33.7	33.285	2497000	11206000	1226800	1081200	885470	4784900	385780	245040	0	0	2264800	209360	540340
sp|P49862|KLK7_HUMAN	KLK7	sp|P49862|KLK7_HUMAN Kallikrein-7 OS=Homo sapiens OX=9606 GN=KLK7 PE=1 SV=1	1	1	1	1	6.3	27.524	0	0	0	1757.9	0	0	0	0	0	0	0	0	0
sp|P49908|SEPP1_HUMAN	SELENOP	sp|P49908|SEPP1_HUMAN Selenoprotein P OS=Homo sapiens OX=9606 GN=SELENOP PE=1 SV=3	1	3	3	3	8.1	43.173	0	24811	0	38368	0	0	63560	44300	0	0	0	31665	33013
sp|P50395|GDIB_HUMAN	GDI2	sp|P50395|GDIB_HUMAN Rab GDP dissociation inhibitor beta OS=Homo sapiens OX=9606 GN=GDI2 PE=1 SV=2	1	15	15	12	36.6	50.663	0	461630	148780	116350	0	52339	328970	266220	0	291820	356740	836130	89916
sp|P50502|F10A1_HUMAN;sp|Q8NFI4|F10A5_HUMAN;sp|Q8IZP2|ST134_HUMAN	ST13	sp|P50502|F10A1_HUMAN Hsc70-interacting protein OS=Homo sapiens OX=9606 GN=ST13 PE=1 SV=2;sp|Q8NFI4|F10A5_HUMAN Putative protein FAM10A5 OS=Homo sapiens OX=9606 GN=ST13P5 PE=5 SV=1;sp|Q8IZP2|ST134_HUMAN Putative protein FAM10A4 OS=Homo sapiens OX=9606 GN=S	3	5	5	5	16.5	41.331	0	65575	183740	218460	377030	107870	130250	170680	0	70943	207480	282220	179460
sp|P50747|BPL1_HUMAN	HLCS	sp|P50747|BPL1_HUMAN Biotin--protein ligase OS=Homo sapiens OX=9606 GN=HLCS PE=1 SV=1	1	1	1	1	1.2	80.759	0	0	0	0	0	0	0	0	0	0	0	0	479170
sp|P50895|BCAM_HUMAN	BCAM	sp|P50895|BCAM_HUMAN Basal cell adhesion molecule OS=Homo sapiens OX=9606 GN=BCAM PE=1 SV=2	1	5	5	5	10.5	67.404	0	19303	12715	48888	0	0	21536	27921	0	0	35122	24797	0
sp|P50990|TCPQ_HUMAN	CCT8	sp|P50990|TCPQ_HUMAN T-complex protein 1 subunit theta OS=Homo sapiens OX=9606 GN=CCT8 PE=1 SV=4	1	5	5	5	12.2	59.62	0	156200	268810	167430	0	0	145450	0	0	615960	181250	164040	0
sp|P50991|TCPD_HUMAN	CCT4	sp|P50991|TCPD_HUMAN T-complex protein 1 subunit delta OS=Homo sapiens OX=9606 GN=CCT4 PE=1 SV=4	1	4	4	4	10	57.924	0	25974	36071	28664	0	0	20632	0	0	0	0	35005	0
sp|P50995|ANX11_HUMAN	ANXA11	sp|P50995|ANX11_HUMAN Annexin A11 OS=Homo sapiens OX=9606 GN=ANXA11 PE=1 SV=1	1	1	1	1	2	54.389	0	0	0	0	0	0	0	0	0	0	0	8691.2	0
sp|P51149|RAB7A_HUMAN	RAB7A	sp|P51149|RAB7A_HUMAN Ras-related protein Rab-7a OS=Homo sapiens OX=9606 GN=RAB7A PE=1 SV=1	1	3	3	3	18.8	23.489	0	0	0	0	0	0	0	0	0	0	0	12982	0
sp|P51648|AL3A2_HUMAN	ALDH3A2	sp|P51648|AL3A2_HUMAN Aldehyde dehydrogenase family 3 member A2 OS=Homo sapiens OX=9606 GN=ALDH3A2 PE=1 SV=1	1	1	1	1	2.9	54.847	0	0	14573000	0	0	0	0	0	0	0	0	0	0
sp|P51693|APLP1_HUMAN	APLP1	sp|P51693|APLP1_HUMAN Amyloid-like protein 1 OS=Homo sapiens OX=9606 GN=APLP1 PE=1 SV=3	1	1	1	1	1.4	72.176	0	0	0	0	0	0	0	0	0	0	0	3832.2	0
sp|P51884|LUM_HUMAN;CON__Q05443	LUM	sp|P51884|LUM_HUMAN Lumican OS=Homo sapiens OX=9606 GN=LUM PE=1 SV=2	2	8	8	8	19.5	38.429	1166000	865030	1783000	3611700	420350	2026400	2135000	1084600	1220600	345810	1457600	1590300	5173700
sp|P51888|PRELP_HUMAN	PRELP	sp|P51888|PRELP_HUMAN Prolargin OS=Homo sapiens OX=9606 GN=PRELP PE=1 SV=1	1	12	12	12	37.4	43.809	298770	2291400	806140	1106400	0	910060	743180	243840	0	54691	863110	243520	1139900
sp|P51991|ROA3_HUMAN	HNRNPA3	sp|P51991|ROA3_HUMAN Heterogeneous nuclear ribonucleoprotein A3 OS=Homo sapiens OX=9606 GN=HNRNPA3 PE=1 SV=2	1	2	2	2	5	39.594	0	0	0	33098	0	0	0	0	0	0	0	31757	57838
sp|P52209|6PGD_HUMAN	PGD	sp|P52209|6PGD_HUMAN 6-phosphogluconate dehydrogenase, decarboxylating OS=Homo sapiens OX=9606 GN=PGD PE=1 SV=3	1	7	7	7	22.2	53.139	0	136810	176450	64677	0	0	134250	48365	0	0	110840	269130	0
sp|P52565|GDIR1_HUMAN	ARHGDIA	sp|P52565|GDIR1_HUMAN Rho GDP-dissociation inhibitor 1 OS=Homo sapiens OX=9606 GN=ARHGDIA PE=1 SV=3	1	5	5	5	22.5	23.207	0	174820	185580	206100	0	68928	230140	115640	0	154180	87727	441240	0
sp|P52566|GDIR2_HUMAN	ARHGDIB	sp|P52566|GDIR2_HUMAN Rho GDP-dissociation inhibitor 2 OS=Homo sapiens OX=9606 GN=ARHGDIB PE=1 SV=3	1	5	5	5	26.9	22.988	0	75964	57795	154690	0	0	122080	48794	0	25412	73196	339190	61788
sp|P52823|STC1_HUMAN	STC1	sp|P52823|STC1_HUMAN Stanniocalcin-1 OS=Homo sapiens OX=9606 GN=STC1 PE=1 SV=1	1	1	1	1	4.9	27.621	0	25192	0	0	0	0	0	0	0	0	0	0	0
sp|P52888|THOP1_HUMAN	THOP1	sp|P52888|THOP1_HUMAN Thimet oligopeptidase OS=Homo sapiens OX=9606 GN=THOP1 PE=1 SV=2	1	1	1	1	2.8	78.839	0	0	0	0	0	0	0	0	0	0	0	6091.9	0
sp|P52907|CAZA1_HUMAN	CAPZA1	sp|P52907|CAZA1_HUMAN F-actin-capping protein subunit alpha-1 OS=Homo sapiens OX=9606 GN=CAPZA1 PE=1 SV=3	1	5	5	3	27.3	32.922	0	79869	53577	70851	0	0	59360	60191	0	35949	51352	195200	32230
sp|P52943|CRIP2_HUMAN	CRIP2	sp|P52943|CRIP2_HUMAN Cysteine-rich protein 2 OS=Homo sapiens OX=9606 GN=CRIP2 PE=1 SV=1	1	2	2	2	16.8	22.492	0	50548	0	0	0	0	0	0	0	0	0	0	0
sp|P53004|BIEA_HUMAN	BLVRA	sp|P53004|BIEA_HUMAN Biliverdin reductase A OS=Homo sapiens OX=9606 GN=BLVRA PE=1 SV=2	1	6	6	6	22.6	33.428	0	63197	63538	0	0	0	65645	56823	0	93427	75407	163300	0
sp|P53396|ACLY_HUMAN	ACLY	sp|P53396|ACLY_HUMAN ATP-citrate synthase OS=Homo sapiens OX=9606 GN=ACLY PE=1 SV=3	1	7	7	7	7.8	120.84	0	64622	66312	39082	0	0	48047	0	0	33750	60347	68299	0
sp|P54108|CRIS3_HUMAN	CRISP3	sp|P54108|CRIS3_HUMAN Cysteine-rich secretory protein 3 OS=Homo sapiens OX=9606 GN=CRISP3 PE=1 SV=1	1	1	1	1	3.7	27.63	0	0	0	0	0	0	0	0	0	0	0	0	28920
sp|P54578|UBP14_HUMAN	USP14	sp|P54578|UBP14_HUMAN Ubiquitin carboxyl-terminal hydrolase 14 OS=Homo sapiens OX=9606 GN=USP14 PE=1 SV=3	1	7	7	7	14.4	56.068	0	85506	122310	79018	0	0	81815	91793	0	65340	105410	218030	0
sp|P54652|HSP72_HUMAN	HSPA2	sp|P54652|HSP72_HUMAN Heat shock-related 70 kDa protein 2 OS=Homo sapiens OX=9606 GN=HSPA2 PE=1 SV=1	1	8	2	2	14.7	70.02	0	0	0	0	0	0	0	0	0	0	0	35613	0
sp|P54725|RD23A_HUMAN	RAD23A	sp|P54725|RD23A_HUMAN UV excision repair protein RAD23 homolog A OS=Homo sapiens OX=9606 GN=RAD23A PE=1 SV=1	1	5	5	4	15.4	39.609	0	161190	274290	99598	188690	113490	183080	178970	0	179800	159220	338550	249830
sp|P54727|RD23B_HUMAN	RAD23B	sp|P54727|RD23B_HUMAN UV excision repair protein RAD23 homolog B OS=Homo sapiens OX=9606 GN=RAD23B PE=1 SV=1	1	3	2	2	7.8	43.171	0	0	0	0	0	0	0	0	0	0	0	31215	0
sp|P54826|GAS1_HUMAN	GAS1	sp|P54826|GAS1_HUMAN Growth arrest-specific protein 1 OS=Homo sapiens OX=9606 GN=GAS1 PE=2 SV=2	1	2	2	2	11	35.693	0	83554	0	0	0	0	0	0	0	0	15500	0	0
sp|P54920|SNAA_HUMAN	NAPA	sp|P54920|SNAA_HUMAN Alpha-soluble NSF attachment protein OS=Homo sapiens OX=9606 GN=NAPA PE=1 SV=3	1	5	5	5	21.7	33.232	0	82117	17310	0	0	0	41459	36816	0	0	52067	96093	0
sp|P55036|PSMD4_HUMAN	PSMD4	sp|P55036|PSMD4_HUMAN 26S proteasome non-ATPase regulatory subunit 4 OS=Homo sapiens OX=9606 GN=PSMD4 PE=1 SV=1	1	2	2	2	10.6	40.736	0	0	0	0	0	0	0	0	0	0	0	2690.2	0
sp|P55058|PLTP_HUMAN	PLTP	sp|P55058|PLTP_HUMAN Phospholipid transfer protein OS=Homo sapiens OX=9606 GN=PLTP PE=1 SV=1	1	4	4	4	8.7	54.739	0	141660	44037	39578	0	0	99263	28892	0	0	56768	20129	0
sp|P55072|TERA_HUMAN	VCP	sp|P55072|TERA_HUMAN Transitional endoplasmic reticulum ATPase OS=Homo sapiens OX=9606 GN=VCP PE=1 SV=4	1	21	21	21	33.5	89.321	271830	232230	384300	371370	131560	252720	263570	218240	0	216630	382430	891760	119440
sp|P55263|ADK_HUMAN	ADK	sp|P55263|ADK_HUMAN Adenosine kinase OS=Homo sapiens OX=9606 GN=ADK PE=1 SV=2	1	2	2	2	6.6	40.545	0	0	0	0	0	0	0	0	0	0	0	17613	0
sp|P55795|HNRH2_HUMAN;sp|P31943|HNRH1_HUMAN	HNRNPH2	sp|P55795|HNRH2_HUMAN Heterogeneous nuclear ribonucleoprotein H2 OS=Homo sapiens OX=9606 GN=HNRNPH2 PE=1 SV=1;sp|P31943|HNRH1_HUMAN Heterogeneous nuclear ribonucleoprotein H OS=Homo sapiens OX=9606 GN=HNRNPH1 PE=1 SV=4	2	3	3	2	8.7	49.263	0	27251	0	30139	0	0	27886	46247	0	0	40017	72799	0
sp|P55957|BID_HUMAN	BID	sp|P55957|BID_HUMAN BH3-interacting domain death agonist OS=Homo sapiens OX=9606 GN=BID PE=1 SV=1	1	1	1	1	6.7	21.994	0	0	0	0	0	0	0	0	0	0	0	13954	0
sp|P56537|IF6_HUMAN	EIF6	sp|P56537|IF6_HUMAN Eukaryotic translation initiation factor 6 OS=Homo sapiens OX=9606 GN=EIF6 PE=1 SV=1	1	3	3	3	18.8	26.599	0	0	21059	0	0	0	15178	24231	0	0	13318	41816	0
sp|P58546|MTPN_HUMAN	MTPN	sp|P58546|MTPN_HUMAN Myotrophin OS=Homo sapiens OX=9606 GN=MTPN PE=1 SV=2	1	2	2	2	22	12.895	0	71152	72260	0	0	0	58147	66341	0	91007	64361	235110	0
sp|P60174|TPIS_HUMAN	TPI1	sp|P60174|TPIS_HUMAN Triosephosphate isomerase OS=Homo sapiens OX=9606 GN=TPI1 PE=1 SV=3	1	14	14	14	52.8	30.791	4152700	1644000	1820100	2317800	1930700	2583000	1867400	1773400	1226700	4150200	1670500	3834300	1736900
sp|P60660|MYL6_HUMAN;sp|P14649|MYL6B_HUMAN	MYL6	sp|P60660|MYL6_HUMAN Myosin light polypeptide 6 OS=Homo sapiens OX=9606 GN=MYL6 PE=1 SV=2	2	6	6	6	37.1	16.93	180340	239070	183500	478560	290040	239150	261070	277390	0	94948	232480	600300	345480
sp|P60709|ACTB_HUMAN;sp|P63261|ACTG_HUMAN;sp|A5A3E0|POTEF_HUMAN	ACTB	sp|P60709|ACTB_HUMAN Actin, cytoplasmic 1 OS=Homo sapiens OX=9606 GN=ACTB PE=1 SV=1;sp|P63261|ACTG_HUMAN Actin, cytoplasmic 2 OS=Homo sapiens OX=9606 GN=ACTG1 PE=1 SV=1	3	16	16	6	52.8	41.736	10240000	6868500	10499000	14157000	7861400	8565500	10962000	9137900	7030800	7170500	8464400	11180000	9261000
sp|P60891|PRPS1_HUMAN;sp|P11908|PRPS2_HUMAN;sp|P21108|PRPS3_HUMAN	PRPS1	sp|P60891|PRPS1_HUMAN Ribose-phosphate pyrophosphokinase 1 OS=Homo sapiens OX=9606 GN=PRPS1 PE=1 SV=2	3	5	5	5	24.8	34.834	0	89102	25066	0	0	0	58883	29436	0	60074	65925	47300	0
sp|P60900|PSA6_HUMAN	PSMA6	sp|P60900|PSA6_HUMAN Proteasome subunit alpha type-6 OS=Homo sapiens OX=9606 GN=PSMA6 PE=1 SV=1	1	9	9	9	44.3	27.399	0	107100	145130	67007	0	0	87843	55324	0	0	94209	242000	50659
sp|P60903|S10AA_HUMAN	S100A10	sp|P60903|S10AA_HUMAN Protein S100-A10 OS=Homo sapiens OX=9606 GN=S100A10 PE=1 SV=2	1	2	2	2	35.1	11.203	0	54823	0	0	0	0	0	0	0	0	0	0	0
sp|P60953|CDC42_HUMAN;sp|P84095|RHOG_HUMAN;sp|P17081|RHOQ_HUMAN;sp|Q9H4E5|RHOJ_HUMAN	CDC42	sp|P60953|CDC42_HUMAN Cell division control protein 42 homolog OS=Homo sapiens OX=9606 GN=CDC42 PE=1 SV=2	4	3	2	2	16.8	21.258	0	0	0	0	0	0	42414	19881	0	0	19391	22976	0
sp|P60981|DEST_HUMAN	DSTN	sp|P60981|DEST_HUMAN Destrin OS=Homo sapiens OX=9606 GN=DSTN PE=1 SV=3	1	2	2	2	12.7	18.506	0	0	0	0	0	0	0	0	0	0	0	72239	0
sp|P61086|UBE2K_HUMAN	UBE2K	sp|P61086|UBE2K_HUMAN Ubiquitin-conjugating enzyme E2 K OS=Homo sapiens OX=9606 GN=UBE2K PE=1 SV=3	1	1	1	1	7.5	22.406	0	0	0	0	0	0	0	0	0	0	0	23866	0
sp|P61088|UBE2N_HUMAN;sp|Q5JXB2|UE2NL_HUMAN	UBE2N	sp|P61088|UBE2N_HUMAN Ubiquitin-conjugating enzyme E2 N OS=Homo sapiens OX=9606 GN=UBE2N PE=1 SV=1;sp|Q5JXB2|UE2NL_HUMAN Putative ubiquitin-conjugating enzyme E2 N-like OS=Homo sapiens OX=9606 GN=UBE2NL PE=1 SV=1	2	4	4	4	28.9	17.138	0	71516	24872	31779	0	0	59462	63102	0	61823	51100	129430	40049
sp|P61158|ARP3_HUMAN;sp|Q9P1U1|ARP3B_HUMAN	ACTR3	sp|P61158|ARP3_HUMAN Actin-related protein 3 OS=Homo sapiens OX=9606 GN=ACTR3 PE=1 SV=3	2	3	3	3	8.6	47.371	0	8005.5	0	39622	0	0	41863	20835	0	0	7805	68847	0
sp|P61160|ARP2_HUMAN	ACTR2	sp|P61160|ARP2_HUMAN Actin-related protein 2 OS=Homo sapiens OX=9606 GN=ACTR2 PE=1 SV=1	1	2	2	2	6.6	44.76	0	11829	9067.9	0	0	0	21560	0	0	0	0	0	0
sp|P61224|RAP1B_HUMAN;sp|A6NIZ1|RP1BL_HUMAN	RAP1B	sp|P61224|RAP1B_HUMAN Ras-related protein Rap-1b OS=Homo sapiens OX=9606 GN=RAP1B PE=1 SV=1;sp|A6NIZ1|RP1BL_HUMAN Ras-related protein Rap-1b-like protein OS=Homo sapiens OX=9606 PE=2 SV=1	2	4	4	2	26.6	20.825	0	0	20742	0	0	0	43588	28857	0	0	0	64089	0
sp|P61247|RS3A_HUMAN	RPS3A	sp|P61247|RS3A_HUMAN 40S ribosomal protein S3a OS=Homo sapiens OX=9606 GN=RPS3A PE=1 SV=2	1	2	2	2	10.2	29.945	0	8322.9	0	0	0	0	0	0	0	0	0	0	0
sp|P61586|RHOA_HUMAN;sp|P08134|RHOC_HUMAN	RHOA	sp|P61586|RHOA_HUMAN Transforming protein RhoA OS=Homo sapiens OX=9606 GN=RHOA PE=1 SV=1;sp|P08134|RHOC_HUMAN Rho-related GTP-binding protein RhoC OS=Homo sapiens OX=9606 GN=RHOC PE=1 SV=1	2	2	2	2	13.5	21.768	0	0	0	0	0	0	0	0	0	0	0	36774	0
sp|P61604|CH10_HUMAN	HSPE1	sp|P61604|CH10_HUMAN 10 kDa heat shock protein, mitochondrial OS=Homo sapiens OX=9606 GN=HSPE1 PE=1 SV=2	1	3	3	3	35.3	10.932	0	0	0	0	0	0	0	0	0	0	35800	37659	0
sp|P61626|LYSC_HUMAN	LYZ	sp|P61626|LYSC_HUMAN Lysozyme C OS=Homo sapiens OX=9606 GN=LYZ PE=1 SV=1	1	3	3	3	32.4	16.537	0	358170	0	47444	0	67263	0	0	0	85565	57432	56447	53457
sp|P61769|B2MG_HUMAN	B2M	sp|P61769|B2MG_HUMAN Beta-2-microglobulin OS=Homo sapiens OX=9606 GN=B2M PE=1 SV=1	1	2	2	2	16.8	13.714	121480	196320	187240	21060	181540	235760	321870	188390	1314700	123160	479410	121360	159590
sp|P61916|NPC2_HUMAN	NPC2	sp|P61916|NPC2_HUMAN NPC intracellular cholesterol transporter 2 OS=Homo sapiens OX=9606 GN=NPC2 PE=1 SV=1	1	1	1	1	10.6	16.57	0	0	0	0	0	0	0	0	0	0	0	0	18356
sp|P61956|SUMO2_HUMAN;sp|Q6EEV6|SUMO4_HUMAN;sp|P55854|SUMO3_HUMAN	SUMO2	sp|P61956|SUMO2_HUMAN Small ubiquitin-related modifier 2 OS=Homo sapiens OX=9606 GN=SUMO2 PE=1 SV=3;sp|Q6EEV6|SUMO4_HUMAN Small ubiquitin-related modifier 4 OS=Homo sapiens OX=9606 GN=SUMO4 PE=1 SV=2;sp|P55854|SUMO3_HUMAN Small ubiquitin-related modifier 3	3	2	2	2	23.2	10.871	142440	82575	0	124220	0	99838	86551	105540	0	0	129320	194440	129510
sp|P61970|NTF2_HUMAN	NUTF2	sp|P61970|NTF2_HUMAN Nuclear transport factor 2 OS=Homo sapiens OX=9606 GN=NUTF2 PE=1 SV=1	1	2	2	2	17.3	14.478	0	79197	0	0	0	0	0	0	0	0	0	165210	0
sp|P61978|HNRPK_HUMAN	HNRNPK	sp|P61978|HNRPK_HUMAN Heterogeneous nuclear ribonucleoprotein K OS=Homo sapiens OX=9606 GN=HNRNPK PE=1 SV=1	1	5	5	5	14.5	50.976	0	31506	0	0	0	0	24273	33250	0	0	32433	92916	0
sp|P61981|1433G_HUMAN	YWHAG	sp|P61981|1433G_HUMAN 14-3-3 protein gamma OS=Homo sapiens OX=9606 GN=YWHAG PE=1 SV=2	1	6	3	3	24.7	28.302	68431	82950	113070	157000	100340	103820	111110	106080	0	55850	107680	197410	96908
sp|P62140|PP1B_HUMAN	PPP1CB	sp|P62140|PP1B_HUMAN Serine/threonine-protein phosphatase PP1-beta catalytic subunit OS=Homo sapiens OX=9606 GN=PPP1CB PE=1 SV=3	1	1	1	1	3.1	37.186	0	0	0	0	0	0	0	0	0	0	0	21065	0
sp|P62191|PRS4_HUMAN	PSMC1	sp|P62191|PRS4_HUMAN 26S proteasome regulatory subunit 4 OS=Homo sapiens OX=9606 GN=PSMC1 PE=1 SV=1	1	2	2	2	5.2	49.184	0	19414	0	0	0	0	0	0	0	0	0	17496	0
sp|P62195|PRS8_HUMAN	PSMC5	sp|P62195|PRS8_HUMAN 26S proteasome regulatory subunit 8 OS=Homo sapiens OX=9606 GN=PSMC5 PE=1 SV=1	1	1	1	1	3.2	45.626	0	0	0	0	0	0	0	0	0	0	0	0	4298
sp|P62241|RS8_HUMAN	RPS8	sp|P62241|RS8_HUMAN 40S ribosomal protein S8 OS=Homo sapiens OX=9606 GN=RPS8 PE=1 SV=2	1	1	1	1	6.2	24.205	0	0	0	0	0	0	0	0	0	0	5076.3	0	0
sp|P62258|1433E_HUMAN	YWHAE	sp|P62258|1433E_HUMAN 14-3-3 protein epsilon OS=Homo sapiens OX=9606 GN=YWHAE PE=1 SV=1	1	15	15	13	60.4	29.174	637420	877020	988920	1159300	603930	828740	827410	910880	600040	520660	1026300	1983500	816570
sp|P62328|TYB4_HUMAN	TMSB4X	sp|P62328|TYB4_HUMAN Thymosin beta-4 OS=Homo sapiens OX=9606 GN=TMSB4X PE=1 SV=2	1	2	2	2	31.8	5.0526	711970	1101600	556500	0	523810	276240	951340	742720	0	1314080	1912600	2233000	1050280
sp|P62424|RL7A_HUMAN	RPL7A	sp|P62424|RL7A_HUMAN 60S ribosomal protein L7a OS=Homo sapiens OX=9606 GN=RPL7A PE=1 SV=2	1	2	2	2	10.5	29.995	0	0	0	0	0	0	0	0	0	0	0	10672	0
sp|P62633|CNBP_HUMAN	CNBP	sp|P62633|CNBP_HUMAN Cellular nucleic acid-binding protein OS=Homo sapiens OX=9606 GN=CNBP PE=1 SV=1	1	3	3	3	19.2	19.463	0	5857.2	4741.4	0	0	0	12807	0	0	0	0	9590.9	0
sp|P62805|H4_HUMAN	H4C1	sp|P62805|H4_HUMAN Histone H4 OS=Homo sapiens OX=9606 GN=H4C1 PE=1 SV=2	1	5	5	5	50.5	11.367	288290	334920	135850	254960	472290	368670	300140	475860	167010	251290	392390	341940	494300
sp|P62826|RAN_HUMAN	RAN	sp|P62826|RAN_HUMAN GTP-binding nuclear protein Ran OS=Homo sapiens OX=9606 GN=RAN PE=1 SV=3	1	8	8	8	44.4	24.423	241330	281820	164660	118090	131340	115910	233390	359010	0	596770	471400	610300	173010
sp|P62829|RL23_HUMAN	RPL23	sp|P62829|RL23_HUMAN 60S ribosomal protein L23 OS=Homo sapiens OX=9606 GN=RPL23 PE=1 SV=1	1	1	1	1	14.3	14.865	0	5233.3	0	0	0	0	0	0	0	0	0	0	0
sp|P62873|GBB1_HUMAN;sp|P16520|GBB3_HUMAN	GNB1	sp|P62873|GBB1_HUMAN Guanine nucleotide-binding protein G(I)/G(S)/G(T) subunit beta-1 OS=Homo sapiens OX=9606 GN=GNB1 PE=1 SV=3	2	4	1	1	13.2	37.377	0	0	0	0	0	0	0	0	0	0	0	17818	0
sp|P62877|RBX1_HUMAN	RBX1	sp|P62877|RBX1_HUMAN E3 ubiquitin-protein ligase RBX1 OS=Homo sapiens OX=9606 GN=RBX1 PE=1 SV=1	1	1	1	1	16.7	12.274	0	0	0	0	0	0	0	0	0	0	0	0	8437.4
sp|P62879|GBB2_HUMAN;sp|Q9HAV0|GBB4_HUMAN	GNB2	sp|P62879|GBB2_HUMAN Guanine nucleotide-binding protein G(I)/G(S)/G(T) subunit beta-2 OS=Homo sapiens OX=9606 GN=GNB2 PE=1 SV=3;sp|Q9HAV0|GBB4_HUMAN Guanine nucleotide-binding protein subunit beta-4 OS=Homo sapiens OX=9606 GN=GNB4 PE=1 SV=3	2	5	5	2	16.8	37.331	112920	59666	56770	119090	0	76228	87080	62702	0	56406	125730	213850	0
sp|P62906|RL10A_HUMAN	RPL10A	sp|P62906|RL10A_HUMAN 60S ribosomal protein L10a OS=Homo sapiens OX=9606 GN=RPL10A PE=1 SV=2	1	2	2	2	13.4	24.831	0	11682	0	0	0	0	14474	0	0	0	0	9945.5	0
sp|P62910|RL32_HUMAN	RPL32	sp|P62910|RL32_HUMAN 60S ribosomal protein L32 OS=Homo sapiens OX=9606 GN=RPL32 PE=1 SV=2	1	1	1	1	9.6	15.86	0	0	0	0	0	0	0	0	0	0	0	0	9826.8
sp|P62917|RL8_HUMAN	RPL8	sp|P62917|RL8_HUMAN 60S ribosomal protein L8 OS=Homo sapiens OX=9606 GN=RPL8 PE=1 SV=2	1	1	1	1	6.2	28.024	0	0	0	0	0	0	0	0	0	0	0	0	6282.4
sp|P62937|PPIA_HUMAN;sp|Q9Y536|PAL4A_HUMAN;sp|P0DN26|PAL4F_HUMAN;sp|F5H284|PAL4D_HUMAN;sp|A0A0B4J2A2|PAL4C_HUMAN;sp|A0A075B767|PAL4H_HUMAN;sp|A0A075B759|PAL4E_HUMAN	PPIA	sp|P62937|PPIA_HUMAN Peptidyl-prolyl cis-trans isomerase A OS=Homo sapiens OX=9606 GN=PPIA PE=1 SV=2	7	5	5	5	30.9	18.012	2237700	805660	997420	759640	654050	741930	926570	1185000	538080	1402800	997640	2040500	381490
sp|P62942|FKB1A_HUMAN	FKBP1A	sp|P62942|FKB1A_HUMAN Peptidyl-prolyl cis-trans isomerase FKBP1A OS=Homo sapiens OX=9606 GN=FKBP1A PE=1 SV=2	1	4	4	4	40.7	11.951	0	21987	0	0	0	0	27630	0	0	0	0	53424	0
sp|P62987|RL40_HUMAN;sp|P62979|RS27A_HUMAN;sp|P0CG47|UBB_HUMAN;sp|P0CG48|UBC_HUMAN	UBA52	sp|P62987|RL40_HUMAN Ubiquitin-60S ribosomal protein L40 OS=Homo sapiens OX=9606 GN=UBA52 PE=1 SV=2;sp|P62979|RS27A_HUMAN Ubiquitin-40S ribosomal protein S27a OS=Homo sapiens OX=9606 GN=RPS27A PE=1 SV=2;sp|P0CG47|UBB_HUMAN Polyubiquitin-B OS=Homo sapiens O	4	3	3	3	26.6	14.728	926010	133300	122180	278270	1542300	1023600	152110	241960	0	0	145700	762780	998160
sp|P63000|RAC1_HUMAN;sp|P60763|RAC3_HUMAN;sp|P15153|RAC2_HUMAN	RAC1	sp|P63000|RAC1_HUMAN Ras-related C3 botulinum toxin substrate 1 OS=Homo sapiens OX=9606 GN=RAC1 PE=1 SV=1;sp|P60763|RAC3_HUMAN Ras-related C3 botulinum toxin substrate 3 OS=Homo sapiens OX=9606 GN=RAC3 PE=1 SV=1;sp|P15153|RAC2_HUMAN Ras-related C3 botulinu	3	3	3	2	18.2	21.45	0	71497	31783	0	0	0	64943	59581	0	0	44817	43888	30116
sp|P63104|1433Z_HUMAN	YWHAZ	sp|P63104|1433Z_HUMAN 14-3-3 protein zeta/delta OS=Homo sapiens OX=9606 GN=YWHAZ PE=1 SV=1	1	10	7	7	44.5	27.745	326190	521550	604170	900840	512550	611110	495240	601970	356780	220070	543200	1213200	481950
sp|P63208|SKP1_HUMAN	SKP1	sp|P63208|SKP1_HUMAN S-phase kinase-associated protein 1 OS=Homo sapiens OX=9606 GN=SKP1 PE=1 SV=2	1	1	1	1	7.4	18.658	0	0	0	0	0	0	0	0	0	0	0	0	14584
sp|P63244|RACK1_HUMAN	RACK1	sp|P63244|RACK1_HUMAN Receptor of activated protein C kinase 1 OS=Homo sapiens OX=9606 GN=RACK1 PE=1 SV=3	1	3	3	3	12.3	35.076	0	0	0	0	0	0	0	0	0	0	0	20802	0
sp|P67775|PP2AA_HUMAN;sp|P62714|PP2AB_HUMAN	PPP2CA	sp|P67775|PP2AA_HUMAN Serine/threonine-protein phosphatase 2A catalytic subunit alpha isoform OS=Homo sapiens OX=9606 GN=PPP2CA PE=1 SV=1;sp|P62714|PP2AB_HUMAN Serine/threonine-protein phosphatase 2A catalytic subunit beta isoform OS=Homo sapiens OX=9606 G	2	2	2	2	8.4	35.594	0	0	0	0	0	0	0	0	0	0	0	35556	0
sp|P67809|YBOX1_HUMAN;sp|Q9Y2T7|YBOX2_HUMAN;sp|P16989|YBOX3_HUMAN	YBX1	sp|P67809|YBOX1_HUMAN Y-box-binding protein 1 OS=Homo sapiens OX=9606 GN=YBX1 PE=1 SV=3;sp|Q9Y2T7|YBOX2_HUMAN Y-box-binding protein 2 OS=Homo sapiens OX=9606 GN=YBX2 PE=1 SV=2;sp|P16989|YBOX3_HUMAN Y-box-binding protein 3 OS=Homo sapiens OX=9606 GN=YBX3 PE	3	2	2	2	9.3	35.924	0	10014	14741	19039	0	0	18095	0	0	0	12528	32723	0
sp|P67936|TPM4_HUMAN	TPM4	sp|P67936|TPM4_HUMAN Tropomyosin alpha-4 chain OS=Homo sapiens OX=9606 GN=TPM4 PE=1 SV=3	1	11	11	6	31.9	28.521	363240	342700	591330	845770	481740	604520	923400	508560	0	185400	440870	586960	1359300
sp|P68036|UB2L3_HUMAN;sp|A0A1B0GUS4|UB2L5_HUMAN	UBE2L3	sp|P68036|UB2L3_HUMAN Ubiquitin-conjugating enzyme E2 L3 OS=Homo sapiens OX=9606 GN=UBE2L3 PE=1 SV=1;sp|A0A1B0GUS4|UB2L5_HUMAN Ubiquitin-conjugating enzyme E2 L5 OS=Homo sapiens OX=9606 GN=UBE2L5 PE=2 SV=1	2	3	3	3	20.8	17.861	0	65781	0	18652	43605	0	41281	45189	0	51979	54271	73882	37624
sp|P68104|EF1A1_HUMAN;sp|Q5VTE0|EF1A3_HUMAN;sp|Q05639|EF1A2_HUMAN	EEF1A1	sp|P68104|EF1A1_HUMAN Elongation factor 1-alpha 1 OS=Homo sapiens OX=9606 GN=EEF1A1 PE=1 SV=1;sp|Q5VTE0|EF1A3_HUMAN Putative elongation factor 1-alpha-like 3 OS=Homo sapiens OX=9606 GN=EEF1A1P5 PE=5 SV=1;sp|Q05639|EF1A2_HUMAN Elongation factor 1-alpha 2 OS	3	7	7	7	19.9	50.14	303810	417220	151310	518940	505880	398010	300550	281650	177700	156730	280750	225710	447530
sp|P68133|ACTS_HUMAN;sp|P68032|ACTC_HUMAN;sp|P62736|ACTA_HUMAN;sp|P63267|ACTH_HUMAN	ACTA1	sp|P68133|ACTS_HUMAN Actin, alpha skeletal muscle OS=Homo sapiens OX=9606 GN=ACTA1 PE=1 SV=1;sp|P68032|ACTC_HUMAN Actin, alpha cardiac muscle 1 OS=Homo sapiens OX=9606 GN=ACTC1 PE=1 SV=1;sp|P62736|ACTA_HUMAN Actin, aortic smooth muscle OS=Homo sapiens OX=9	4	12	3	3	35.8	42.051	0	210940	750560	408520	0	0	910050	539300	0	0	618710	397960	0
sp|P68363|TBA1B_HUMAN	TUBA1B	sp|P68363|TBA1B_HUMAN Tubulin alpha-1B chain OS=Homo sapiens OX=9606 GN=TUBA1B PE=1 SV=1	1	13	13	0	37.7	50.151	100220	1018800	311450	801390	0	170430	568870	287550	0	0	483420	1054900	203290
sp|P68371|TBB4B_HUMAN;sp|P04350|TBB4A_HUMAN;sp|Q3ZCM7|TBB8_HUMAN	TUBB4B	sp|P68371|TBB4B_HUMAN Tubulin beta-4B chain OS=Homo sapiens OX=9606 GN=TUBB4B PE=1 SV=1;sp|P04350|TBB4A_HUMAN Tubulin beta-4A chain OS=Homo sapiens OX=9606 GN=TUBB4A PE=1 SV=2;sp|Q3ZCM7|TBB8_HUMAN Tubulin beta-8 chain OS=Homo sapiens OX=9606 GN=TUBB8 PE=1	3	12	12	3	32.1	49.83	160180	761400	308320	861260	310080	380440	485470	308150	87414	98855	478610	536600	232770
sp|P68871|HBB_HUMAN	HBB	sp|P68871|HBB_HUMAN Hemoglobin subunit beta OS=Homo sapiens OX=9606 GN=HBB PE=1 SV=2	1	18	18	9	97.3	15.998	601030000	408700000	604830000	266090000	242860000	229090000	383330000	492160000	229320000	750780000	534030000	765000000	227380000
sp|P69891|HBG1_HUMAN	HBG1	sp|P69891|HBG1_HUMAN Hemoglobin subunit gamma-1 OS=Homo sapiens OX=9606 GN=HBG1 PE=1 SV=2	1	13	12	2	80.3	16.14	2192300	3013600	3840200	4281200	1090000	818910	9171500	2243500	933150	44254000	6578800	3901200	2734900
sp|P69892|HBG2_HUMAN	HBG2	sp|P69892|HBG2_HUMAN Hemoglobin subunit gamma-2 OS=Homo sapiens OX=9606 GN=HBG2 PE=1 SV=2	1	12	1	1	78.9	16.126	0	0	76578	288900	246810	0	1212000	0	0	5776600	999540	388440	72846
sp|P69905|HBA_HUMAN	HBA1	sp|P69905|HBA_HUMAN Hemoglobin subunit alpha OS=Homo sapiens OX=9606 GN=HBA1 PE=1 SV=2	1	12	12	9	79.6	15.257	237220000	196870000	265130000	140180000	83894000	86568000	184340000	230720000	91122000	431470000	275370000	352330000	74723000
sp|P78371|TCPB_HUMAN	CCT2	sp|P78371|TCPB_HUMAN T-complex protein 1 subunit beta OS=Homo sapiens OX=9606 GN=CCT2 PE=1 SV=4	1	4	4	4	10.7	57.488	0	46629	82977	0	0	0	35007	0	0	0	41279	59419	0
sp|P78417|GSTO1_HUMAN	GSTO1	sp|P78417|GSTO1_HUMAN Glutathione S-transferase omega-1 OS=Homo sapiens OX=9606 GN=GSTO1 PE=1 SV=2	1	11	11	11	40.2	27.566	995940	557330	821040	628720	484900	336210	591500	754000	232140	1501500	460910	1157600	263170
sp|P78539|SRPX_HUMAN	SRPX	sp|P78539|SRPX_HUMAN Sushi repeat-containing protein SRPX OS=Homo sapiens OX=9606 GN=SRPX PE=1 SV=1	1	1	1	1	2.6	51.571	0	7852.1	0	0	0	0	0	0	0	0	0	0	0
sp|P80108|PHLD_HUMAN	GPLD1	sp|P80108|PHLD_HUMAN Phosphatidylinositol-glycan-specific phospholipase D OS=Homo sapiens OX=9606 GN=GPLD1 PE=1 SV=3	1	8	8	8	11.8	92.335	0	74571	113980	44794	0	0	170370	81969	0	0	59445	57552	0
sp|P80188|NGAL_HUMAN	LCN2	sp|P80188|NGAL_HUMAN Neutrophil gelatinase-associated lipocalin OS=Homo sapiens OX=9606 GN=LCN2 PE=1 SV=2	1	8	8	8	46.5	22.588	149540	6251800	254190	136330	0	198960	320610	85630	0	186890	805470	101530	0
sp|P80723|BASP1_HUMAN	BASP1	sp|P80723|BASP1_HUMAN Brain acid soluble protein 1 OS=Homo sapiens OX=9606 GN=BASP1 PE=1 SV=2	1	3	3	3	21.1	22.693	0	9872.7	25998	38354	26478	0	29521	17413	0	0	20287	15571	26795
sp|P80748|LV321_HUMAN	IGLV3-21	sp|P80748|LV321_HUMAN Immunoglobulin lambda variable 3-21 OS=Homo sapiens OX=9606 GN=IGLV3-21 PE=1 SV=2	1	3	1	1	41.9	12.446	0	0	80491	0	0	0	0	0	0	0	0	0	0
sp|P81605|DCD_HUMAN	DCD	sp|P81605|DCD_HUMAN Dermcidin OS=Homo sapiens OX=9606 GN=DCD PE=1 SV=2	1	2	2	2	20	11.284	0	0	56383	280030	928570	393860	0	189360	572480	603020	0	67307	2536200
sp|P84077|ARF1_HUMAN;sp|P61204|ARF3_HUMAN	ARF1	sp|P84077|ARF1_HUMAN ADP-ribosylation factor 1 OS=Homo sapiens OX=9606 GN=ARF1 PE=1 SV=2;sp|P61204|ARF3_HUMAN ADP-ribosylation factor 3 OS=Homo sapiens OX=9606 GN=ARF3 PE=1 SV=2	2	1	1	1	8.3	20.697	0	0	0	0	0	0	0	0	0	0	0	19128	0
sp|P84090|ERH_HUMAN	ERH	sp|P84090|ERH_HUMAN Enhancer of rudimentary homolog OS=Homo sapiens OX=9606 GN=ERH PE=1 SV=1	1	2	2	2	26.9	12.259	0	0	0	0	0	0	0	0	0	0	0	36505	0
sp|P98160|PGBM_HUMAN	HSPG2	sp|P98160|PGBM_HUMAN Basement membrane-specific heparan sulfate proteoglycan core protein OS=Homo sapiens OX=9606 GN=HSPG2 PE=1 SV=4	1	9	9	9	3	468.83	0	71712	0	0	0	0	12497	0	0	0	0	0	0
sp|P98164|LRP2_HUMAN	LRP2	sp|P98164|LRP2_HUMAN Low-density lipoprotein receptor-related protein 2 OS=Homo sapiens OX=9606 GN=LRP2 PE=1 SV=3	1	7	7	7	1.7	521.95	0	0	0	0	0	0	96524	112890	0	0	80009	134250	0
sp|Q00013|EM55_HUMAN	MPP1	sp|Q00013|EM55_HUMAN 55 kDa erythrocyte membrane protein OS=Homo sapiens OX=9606 GN=MPP1 PE=1 SV=2	1	4	4	4	11.4	52.296	0	41938	74336	33634	0	0	29968	35518	0	80069	54743	52733	0
sp|Q00169|PIPNA_HUMAN	PITPNA	sp|Q00169|PIPNA_HUMAN Phosphatidylinositol transfer protein alpha isoform OS=Homo sapiens OX=9606 GN=PITPNA PE=1 SV=2	1	1	1	1	7	31.806	0	0	0	0	0	0	0	0	0	0	0	9087.2	0
sp|Q00577|PURA_HUMAN	PURA	sp|Q00577|PURA_HUMAN Transcriptional activator protein Pur-alpha OS=Homo sapiens OX=9606 GN=PURA PE=1 SV=2	1	1	1	1	2.8	34.91	0	0	0	0	0	0	0	0	0	0	0	33591	0
sp|Q00610|CLH1_HUMAN;sp|P53675|CLH2_HUMAN	CLTC	sp|Q00610|CLH1_HUMAN Clathrin heavy chain 1 OS=Homo sapiens OX=9606 GN=CLTC PE=1 SV=5	2	12	12	12	9.7	191.61	0	106810	44354	137570	0	38585	98646	37252	0	0	120970	184450	0
sp|Q00796|DHSO_HUMAN	SORD	sp|Q00796|DHSO_HUMAN Sorbitol dehydrogenase OS=Homo sapiens OX=9606 GN=SORD PE=1 SV=4	1	4	4	3	17.6	38.324	0	42042	15417	24222	0	0	21938	0	0	0	0	0	0
sp|Q00839|HNRPU_HUMAN	HNRNPU	sp|Q00839|HNRPU_HUMAN Heterogeneous nuclear ribonucleoprotein U OS=Homo sapiens OX=9606 GN=HNRNPU PE=1 SV=6	1	2	2	2	2.3	90.583	0	16581	0	0	0	0	0	0	0	0	0	12314	0
sp|Q01082|SPTB2_HUMAN;sp|O15020|SPTN2_HUMAN	SPTBN1	sp|Q01082|SPTB2_HUMAN Spectrin beta chain, non-erythrocytic 1 OS=Homo sapiens OX=9606 GN=SPTBN1 PE=1 SV=2	2	59	56	56	31.6	274.61	191990	663830	482870	1066100	189070	478830	410600	437520	0	56611	508060	1870100	413680
sp|Q01469|FABP5_HUMAN;sp|A8MUU1|FB5L3_HUMAN	FABP5	sp|Q01469|FABP5_HUMAN Fatty acid-binding protein 5 OS=Homo sapiens OX=9606 GN=FABP5 PE=1 SV=3	2	7	7	7	65.9	15.164	119740	210560	78199	166240	577740	235130	145000	480300	415000	253060	175250	217630	674500
sp|Q01518|CAP1_HUMAN	CAP1	sp|Q01518|CAP1_HUMAN Adenylyl cyclase-associated protein 1 OS=Homo sapiens OX=9606 GN=CAP1 PE=1 SV=5	1	9	9	9	23.8	51.901	0	132990	70161	162400	42607	88784	137880	104960	0	99440	122570	384070	95331
sp|Q01995|TAGL_HUMAN	TAGLN	sp|Q01995|TAGL_HUMAN Transgelin OS=Homo sapiens OX=9606 GN=TAGLN PE=1 SV=4	1	8	8	8	39.8	22.611	0	114450	53600	147640	151160	141970	283400	157390	0	126740	200110	235270	149870
sp|Q02094|RHAG_HUMAN	RHAG	sp|Q02094|RHAG_HUMAN Ammonium transporter Rh type A OS=Homo sapiens OX=9606 GN=RHAG PE=1 SV=2	1	1	1	1	2.2	44.197	0	0	0	0	0	0	0	0	0	0	0	60905	0
sp|Q02413|DSG1_HUMAN;sp|Q86SJ6|DSG4_HUMAN	DSG1	sp|Q02413|DSG1_HUMAN Desmoglein-1 OS=Homo sapiens OX=9606 GN=DSG1 PE=1 SV=2	2	10	10	10	12.4	113.75	0	49519	110770	358230	1717400	632010	31668	78911	483030	509560	116790	45032	750770
sp|Q02790|FKBP4_HUMAN	FKBP4	sp|Q02790|FKBP4_HUMAN Peptidyl-prolyl cis-trans isomerase FKBP4 OS=Homo sapiens OX=9606 GN=FKBP4 PE=1 SV=3	1	2	2	2	8.1	51.804	0	0	0	0	0	0	0	0	0	0	0	20990	0
sp|Q02878|RL6_HUMAN	RPL6	sp|Q02878|RL6_HUMAN 60S ribosomal protein L6 OS=Homo sapiens OX=9606 GN=RPL6 PE=1 SV=3	1	2	2	2	8.3	32.728	0	10545	0	21950	0	0	6678.7	0	0	0	8483.8	0	0
sp|Q02952|AKA12_HUMAN	AKAP12	sp|Q02952|AKA12_HUMAN A-kinase anchor protein 12 OS=Homo sapiens OX=9606 GN=AKAP12 PE=1 SV=4	1	10	10	10	8.7	191.48	0	19333	62484	43633	0	21550	40144	0	0	0	27573	128460	199990
sp|Q03252|LMNB2_HUMAN	LMNB2	sp|Q03252|LMNB2_HUMAN Lamin-B2 OS=Homo sapiens OX=9606 GN=LMNB2 PE=1 SV=4	1	3	3	3	6.1	69.948	0	11148	17745	0	0	0	30607	63319	0	0	11775	13088	23570
sp|Q03591|FHR1_HUMAN;sp|Q9BXR6|FHR5_HUMAN	CFHR1	sp|Q03591|FHR1_HUMAN Complement factor H-related protein 1 OS=Homo sapiens OX=9606 GN=CFHR1 PE=1 SV=2	2	7	4	2	22.7	37.65	124680	550530	349310	167020	255940	607450	510480	247570	119730	418070	295950	142520	308010
sp|Q04118|PRB3_HUMAN	PRB3	sp|Q04118|PRB3_HUMAN Basic salivary proline-rich protein 3 OS=Homo sapiens OX=9606 GN=PRB3 PE=1 SV=2	1	2	2	1	10.4	30.98	0	0	175840	0	0	0	0	0	0	0	0	0	0
sp|Q04446|GLGB_HUMAN	GBE1	sp|Q04446|GLGB_HUMAN 1,4-alpha-glucan-branching enzyme OS=Homo sapiens OX=9606 GN=GBE1 PE=1 SV=3	1	1	1	1	2.1	80.473	0	0	0	0	0	0	0	0	0	0	0	7797.3	0
sp|Q04756|HGFA_HUMAN;CON__ENSEMBL:ENSBTAP00000023055	HGFAC	sp|Q04756|HGFA_HUMAN Hepatocyte growth factor activator OS=Homo sapiens OX=9606 GN=HGFAC PE=1 SV=1	2	3	3	3	7	70.681	0	37944	40094	0	0	20100	46923	35294	0	42259	0	26909	53061
sp|Q04760|LGUL_HUMAN	GLO1	sp|Q04760|LGUL_HUMAN Lactoylglutathione lyase OS=Homo sapiens OX=9606 GN=GLO1 PE=1 SV=4	1	4	4	4	23.9	20.777	190570	196750	190630	214830	104950	137050	172830	164970	0	0	194190	509450	89620
sp|Q04917|1433F_HUMAN	YWHAH	sp|Q04917|1433F_HUMAN 14-3-3 protein eta OS=Homo sapiens OX=9606 GN=YWHAH PE=1 SV=4	1	7	5	5	26	28.218	0	48340	34505	131690	0	90190	115690	60022	66989	0	84792	221990	0
sp|Q05682|CALD1_HUMAN	CALD1	sp|Q05682|CALD1_HUMAN Caldesmon OS=Homo sapiens OX=9606 GN=CALD1 PE=1 SV=3	1	10	10	10	15.5	93.23	0	46006	168750	85552	44759	64187	206300	75096	0	0	74296	45061	214360
sp|Q05707|COEA1_HUMAN	COL14A1	sp|Q05707|COEA1_HUMAN Collagen alpha-1(XIV) chain OS=Homo sapiens OX=9606 GN=COL14A1 PE=1 SV=3	1	7	7	7	4.7	193.51	0	32058	26159	179690	0	0	58783	0	0	0	29193	23560	49011
sp|Q06033|ITIH3_HUMAN;CON__Q0V8M9	ITIH3	sp|Q06033|ITIH3_HUMAN Inter-alpha-trypsin inhibitor heavy chain H3 OS=Homo sapiens OX=9606 GN=ITIH3 PE=1 SV=2	2	3	3	3	4.3	99.848	0	24960	141970	29681	0	0	118870	119300	0	0	44555	33258	0
sp|Q06323|PSME1_HUMAN	PSME1	sp|Q06323|PSME1_HUMAN Proteasome activator complex subunit 1 OS=Homo sapiens OX=9606 GN=PSME1 PE=1 SV=1	1	9	9	9	37.3	28.723	0	141060	216530	196640	0	60469	180120	140670	0	166020	244920	505160	0
sp|Q06828|FMOD_HUMAN	FMOD	sp|Q06828|FMOD_HUMAN Fibromodulin OS=Homo sapiens OX=9606 GN=FMOD PE=1 SV=2	1	6	6	6	21.8	43.178	57565	1779500	198620	344160	0	453920	214090	40378	0	0	306430	60822	265790
sp|Q06830|PRDX1_HUMAN	PRDX1	sp|Q06830|PRDX1_HUMAN Peroxiredoxin-1 OS=Homo sapiens OX=9606 GN=PRDX1 PE=1 SV=1	1	13	12	11	69.8	22.11	458030	1355100	420150	414550	1821800	403050	820940	925790	373940	1326600	1036900	2694000	1400800
sp|Q07020|RL18_HUMAN	RPL18	sp|Q07020|RL18_HUMAN 60S ribosomal protein L18 OS=Homo sapiens OX=9606 GN=RPL18 PE=1 SV=2	1	2	2	2	13.8	21.634	0	0	0	0	0	0	0	0	0	0	10031	0	0
sp|Q07157|ZO1_HUMAN	TJP1	sp|Q07157|ZO1_HUMAN Tight junction protein ZO-1 OS=Homo sapiens OX=9606 GN=TJP1 PE=1 SV=3	1	4	4	4	3.1	195.46	0	8395.2	0	16380	0	0	0	0	0	0	0	34584	0
sp|Q07507|DERM_HUMAN	DPT	sp|Q07507|DERM_HUMAN Dermatopontin OS=Homo sapiens OX=9606 GN=DPT PE=1 SV=2	1	2	2	2	9.5	24.005	0	0	0	51049	0	0	0	0	0	0	0	0	38867
sp|Q07954|LRP1_HUMAN	LRP1	sp|Q07954|LRP1_HUMAN Prolow-density lipoprotein receptor-related protein 1 OS=Homo sapiens OX=9606 GN=LRP1 PE=1 SV=2	1	1	1	1	0.3	504.6	0	0	0	0	0	0	0	0	0	0	0	12518	0
sp|Q08188|TGM3_HUMAN	TGM3	sp|Q08188|TGM3_HUMAN Protein-glutamine gamma-glutamyltransferase E OS=Homo sapiens OX=9606 GN=TGM3 PE=1 SV=4	1	6	6	6	9.8	76.631	0	0	30817	17201	331330	107540	33710	48961	36252	138140	16542	28794	303360
sp|Q08257|QOR_HUMAN	CRYZ	sp|Q08257|QOR_HUMAN Quinone oxidoreductase OS=Homo sapiens OX=9606 GN=CRYZ PE=1 SV=1	1	6	6	6	24	35.206	0	39765	0	52378	0	0	0	0	0	0	35228	93713	0
sp|Q08380|LG3BP_HUMAN	LGALS3BP	sp|Q08380|LG3BP_HUMAN Galectin-3-binding protein OS=Homo sapiens OX=9606 GN=LGALS3BP PE=1 SV=1	1	14	14	14	30.9	65.33	72481	4670700	384620	693690	198720	1049000	449420	295950	101190	37051	1133000	268130	146010
sp|Q08431|MFGM_HUMAN	MFGE8	sp|Q08431|MFGM_HUMAN Lactadherin OS=Homo sapiens OX=9606 GN=MFGE8 PE=1 SV=3	1	8	8	8	24.5	43.104	0	150650	43251	60186	0	0	100260	59210	0	0	66139	41648	0
sp|Q08495|DEMA_HUMAN	DMTN	sp|Q08495|DEMA_HUMAN Dematin OS=Homo sapiens OX=9606 GN=DMTN PE=1 SV=3	1	6	6	6	19	45.514	182160	142720	249430	113190	322220	0	162670	102290	0	415570	205290	61172	85717
sp|Q08554|DSC1_HUMAN	DSC1	sp|Q08554|DSC1_HUMAN Desmocollin-1 OS=Homo sapiens OX=9606 GN=DSC1 PE=1 SV=2	1	6	6	6	8.7	99.986	70882	0	98071	287990	1374600	437420	46479	91720	557400	615980	111000	40220	1065400
sp|Q09328|MGT5A_HUMAN	MGAT5	sp|Q09328|MGT5A_HUMAN Alpha-1,6-mannosylglycoprotein 6-beta-N-acetylglucosaminyltransferase A OS=Homo sapiens OX=9606 GN=MGAT5 PE=1 SV=1	1	2	2	2	2.6	84.542	0	58906	0	0	0	0	0	0	0	0	0	0	0
sp|Q09666|AHNK_HUMAN	AHNAK	sp|Q09666|AHNK_HUMAN Neuroblast differentiation-associated protein AHNAK OS=Homo sapiens OX=9606 GN=AHNAK PE=1 SV=2	1	26	26	26	9.6	629.09	0	269990	161960	469470	149820	206160	555510	181290	0	0	300120	333680	759240
sp|Q0P6D6|CCD15_HUMAN	CCDC15	sp|Q0P6D6|CCD15_HUMAN Coiled-coil domain-containing protein 15 OS=Homo sapiens OX=9606 GN=CCDC15 PE=2 SV=2	1	1	1	1	0.9	110.48	0	0	0	0	0	0	0	0	0	0	0	72780	0
sp|Q12805|FBLN3_HUMAN	EFEMP1	sp|Q12805|FBLN3_HUMAN EGF-containing fibulin-like extracellular matrix protein 1 OS=Homo sapiens OX=9606 GN=EFEMP1 PE=1 SV=2	1	10	10	10	28	54.64	0	298260	114130	128880	0	86038	282270	148170	773280	0	157270	135980	54504
sp|Q12841|FSTL1_HUMAN	FSTL1	sp|Q12841|FSTL1_HUMAN Follistatin-related protein 1 OS=Homo sapiens OX=9606 GN=FSTL1 PE=1 SV=1	1	6	6	6	24.4	34.985	0	321820	26662	40836	0	21083	32971	0	0	0	74614	11498	0
sp|Q12860|CNTN1_HUMAN	CNTN1	sp|Q12860|CNTN1_HUMAN Contactin-1 OS=Homo sapiens OX=9606 GN=CNTN1 PE=1 SV=1	1	1	1	1	1.1	113.32	0	0	0	0	0	0	0	0	0	0	0	4108.4	0
sp|Q12905|ILF2_HUMAN	ILF2	sp|Q12905|ILF2_HUMAN Interleukin enhancer-binding factor 2 OS=Homo sapiens OX=9606 GN=ILF2 PE=1 SV=2	1	1	1	1	4.1	43.062	0	0	0	0	0	0	0	0	0	0	0	5211.6	0
sp|Q13126|MTAP_HUMAN	MTAP	sp|Q13126|MTAP_HUMAN S-methyl-5-thioadenosine phosphorylase OS=Homo sapiens OX=9606 GN=MTAP PE=1 SV=2	1	4	4	4	20.1	31.236	0	27164	29255	45365	0	0	29182	0	0	0	29905	53926	0
sp|Q13162|PRDX4_HUMAN	PRDX4	sp|Q13162|PRDX4_HUMAN Peroxiredoxin-4 OS=Homo sapiens OX=9606 GN=PRDX4 PE=1 SV=1	1	4	3	3	16.2	30.54	0	13202	11800	0	0	0	12719	0	0	0	0	39922	0
sp|Q13200|PSMD2_HUMAN	PSMD2	sp|Q13200|PSMD2_HUMAN 26S proteasome non-ATPase regulatory subunit 2 OS=Homo sapiens OX=9606 GN=PSMD2 PE=1 SV=3	1	7	7	7	10.6	100.2	0	26172	40667	52713	0	0	31945	0	0	0	29979	42177	0
sp|Q13214|SEM3B_HUMAN	SEMA3B	sp|Q13214|SEM3B_HUMAN Semaphorin-3B OS=Homo sapiens OX=9606 GN=SEMA3B PE=2 SV=1	1	3	3	3	5.2	83.121	0	41609	0	0	0	0	0	0	0	0	0	0	0
sp|Q13228|SBP1_HUMAN	SELENBP1	sp|Q13228|SBP1_HUMAN Methanethiol oxidase OS=Homo sapiens OX=9606 GN=SELENBP1 PE=1 SV=2	1	18	18	18	48.9	52.39	2653200	1409400	3840700	1367600	557180	881710	1579100	1656300	349640	2481500	1858600	3806200	545940
sp|Q13404|UB2V1_HUMAN;sp|Q15819|UB2V2_HUMAN	UBE2V1	sp|Q13404|UB2V1_HUMAN Ubiquitin-conjugating enzyme E2 variant 1 OS=Homo sapiens OX=9606 GN=UBE2V1 PE=1 SV=2;sp|Q15819|UB2V2_HUMAN Ubiquitin-conjugating enzyme E2 variant 2 OS=Homo sapiens OX=9606 GN=UBE2V2 PE=1 SV=4	2	2	2	2	12.9	16.495	0	74133	0	0	0	0	48184	94434	0	114000	84942	168840	0
sp|Q13421|MSLN_HUMAN	MSLN	sp|Q13421|MSLN_HUMAN Mesothelin OS=Homo sapiens OX=9606 GN=MSLN PE=1 SV=2	1	4	4	4	8.4	68.985	0	380660	89187	110930	0	0	53844	0	0	0	106320	33881	0
sp|Q13449|LSAMP_HUMAN	LSAMP	sp|Q13449|LSAMP_HUMAN Limbic system-associated membrane protein OS=Homo sapiens OX=9606 GN=LSAMP PE=1 SV=2	1	4	4	4	14.5	37.393	0	97879	13450	0	0	0	3910	4658.5	0	0	11489	22375	0
sp|Q13510|ASAH1_HUMAN	ASAH1	sp|Q13510|ASAH1_HUMAN Acid ceramidase OS=Homo sapiens OX=9606 GN=ASAH1 PE=1 SV=5	1	1	1	1	2.5	44.659	0	0	0	0	0	0	0	0	0	0	0	11526	0
sp|Q13561|DCTN2_HUMAN	DCTN2	sp|Q13561|DCTN2_HUMAN Dynactin subunit 2 OS=Homo sapiens OX=9606 GN=DCTN2 PE=1 SV=4	1	2	2	2	6	44.23	0	11491	0	0	0	0	0	0	0	0	0	21741	0
sp|Q13564|ULA1_HUMAN	NAE1	sp|Q13564|ULA1_HUMAN NEDD8-activating enzyme E1 regulatory subunit OS=Homo sapiens OX=9606 GN=NAE1 PE=1 SV=1	1	1	1	1	2.8	60.246	0	0	0	0	0	0	0	0	0	0	0	13629	0
sp|Q13596|SNX1_HUMAN;sp|O60749|SNX2_HUMAN	SNX1	sp|Q13596|SNX1_HUMAN Sorting nexin-1 OS=Homo sapiens OX=9606 GN=SNX1 PE=1 SV=3;sp|O60749|SNX2_HUMAN Sorting nexin-2 OS=Homo sapiens OX=9606 GN=SNX2 PE=1 SV=2	2	2	2	2	5.2	59.069	0	17395	0	13100	0	0	14186	0	0	0	11189	20109	0
sp|Q13630|FCL_HUMAN	TSTA3	sp|Q13630|FCL_HUMAN GDP-L-fucose synthase OS=Homo sapiens OX=9606 GN=TSTA3 PE=1 SV=1	1	3	3	3	13.7	35.892	0	80678	88497	0	0	0	46129	0	0	0	0	33623	0
sp|Q13642|FHL1_HUMAN	FHL1	sp|Q13642|FHL1_HUMAN Four and a half LIM domains protein 1 OS=Homo sapiens OX=9606 GN=FHL1 PE=1 SV=4	1	6	6	6	22.3	36.263	0	105140	105120	246460	188000	0	699300	96219	0	0	271850	258560	353030
sp|Q13740|CD166_HUMAN	ALCAM	sp|Q13740|CD166_HUMAN CD166 antigen OS=Homo sapiens OX=9606 GN=ALCAM PE=1 SV=2	1	2	2	2	4.5	65.102	0	0	0	0	0	0	0	0	0	0	0	44610	0
sp|Q13790|APOF_HUMAN	APOF	sp|Q13790|APOF_HUMAN Apolipoprotein F OS=Homo sapiens OX=9606 GN=APOF PE=1 SV=2	1	1	1	1	4.3	35.399	0	0	0	0	0	0	0	0	0	0	0	7634.1	0
sp|Q13813|SPTN1_HUMAN	SPTAN1	sp|Q13813|SPTN1_HUMAN Spectrin alpha chain, non-erythrocytic 1 OS=Homo sapiens OX=9606 GN=SPTAN1 PE=1 SV=3	1	59	59	59	29	284.54	462260	615000	653990	1565400	510030	825260	572300	479070	0	130590	566250	2879600	1005800
sp|Q13822|ENPP2_HUMAN	ENPP2	sp|Q13822|ENPP2_HUMAN Ectonucleotide pyrophosphatase/phosphodiesterase family member 2 OS=Homo sapiens OX=9606 GN=ENPP2 PE=1 SV=3	1	20	20	20	29.4	98.993	0	2022900	114090	248280	0	381600	38116	0	0	0	331160	32733	0
sp|Q13835|PKP1_HUMAN	PKP1	sp|Q13835|PKP1_HUMAN Plakophilin-1 OS=Homo sapiens OX=9606 GN=PKP1 PE=1 SV=2	1	4	4	4	6	82.86	0	0	11474	32841	507430	40852	0	10206	67633	54020	9069.4	35096	358840
sp|Q13867|BLMH_HUMAN	BLMH	sp|Q13867|BLMH_HUMAN Bleomycin hydrolase OS=Homo sapiens OX=9606 GN=BLMH PE=1 SV=1	1	1	1	1	2.9	52.562	0	0	0	0	0	0	0	0	0	0	0	17387	0
sp|Q13885|TBB2A_HUMAN	TUBB2A	sp|Q13885|TBB2A_HUMAN Tubulin beta-2A chain OS=Homo sapiens OX=9606 GN=TUBB2A PE=1 SV=1	1	10	1	1	25.6	49.906	0	0	0	0	0	0	0	0	0	0	0	13121	0
sp|Q13938|CAYP1_HUMAN	CAPS	sp|Q13938|CAYP1_HUMAN Calcyphosin OS=Homo sapiens OX=9606 GN=CAPS PE=1 SV=2	1	2	2	2	9.8	30.24	0	42027	0	0	0	0	0	0	0	0	0	22109	0
sp|Q14055|CO9A2_HUMAN	COL9A2	sp|Q14055|CO9A2_HUMAN Collagen alpha-2(IX) chain OS=Homo sapiens OX=9606 GN=COL9A2 PE=1 SV=2	1	1	1	1	2	65.13	0	0	0	0	0	0	0	0	0	0	0	0	66057
sp|Q14103|HNRPD_HUMAN	HNRNPD	sp|Q14103|HNRPD_HUMAN Heterogeneous nuclear ribonucleoprotein D0 OS=Homo sapiens OX=9606 GN=HNRNPD PE=1 SV=1	1	1	1	1	3.9	38.434	0	0	0	0	0	0	0	0	0	0	0	0	35155
sp|Q14126|DSG2_HUMAN	DSG2	sp|Q14126|DSG2_HUMAN Desmoglein-2 OS=Homo sapiens OX=9606 GN=DSG2 PE=1 SV=2	1	2	2	2	2.4	122.29	0	0	0	17679	0	0	0	0	0	0	0	8127.7	0
sp|Q14195|DPYL3_HUMAN	DPYSL3	sp|Q14195|DPYL3_HUMAN Dihydropyrimidinase-related protein 3 OS=Homo sapiens OX=9606 GN=DPYSL3 PE=1 SV=1	1	10	9	9	25.1	61.963	0	140720	21408	118140	0	0	137040	15200	0	0	68181	229820	0
sp|Q14203|DCTN1_HUMAN	DCTN1	sp|Q14203|DCTN1_HUMAN Dynactin subunit 1 OS=Homo sapiens OX=9606 GN=DCTN1 PE=1 SV=3	1	1	1	1	1.3	141.69	0	0	0	0	0	0	0	0	0	0	0	4304.2	0
sp|Q14240|IF4A2_HUMAN	EIF4A2	sp|Q14240|IF4A2_HUMAN Eukaryotic initiation factor 4A-II OS=Homo sapiens OX=9606 GN=EIF4A2 PE=1 SV=2	1	7	7	3	20.6	46.402	0	190840	145800	107620	0	0	208700	89596	0	179530	173360	395790	0
sp|Q14508|WFDC2_HUMAN	WFDC2	sp|Q14508|WFDC2_HUMAN WAP four-disulfide core domain protein 2 OS=Homo sapiens OX=9606 GN=WFDC2 PE=1 SV=2	1	5	5	5	67.7	12.993	139730	4448800	218160	584760	207500	739410	218600	581730	0	0	433230	124140	265100
sp|Q14512|FGFP1_HUMAN	FGFBP1	sp|Q14512|FGFP1_HUMAN Fibroblast growth factor-binding protein 1 OS=Homo sapiens OX=9606 GN=FGFBP1 PE=1 SV=1	1	1	1	1	6.8	26.264	0	0	0	0	0	0	0	0	0	0	0	3019.9	0
sp|Q14515|SPRL1_HUMAN	SPARCL1	sp|Q14515|SPRL1_HUMAN SPARC-like protein 1 OS=Homo sapiens OX=9606 GN=SPARCL1 PE=1 SV=2	1	3	3	3	6	75.207	0	0	34185	0	0	0	0	0	0	0	78472	0	0
sp|Q14520|HABP2_HUMAN	HABP2	sp|Q14520|HABP2_HUMAN Hyaluronan-binding protein 2 OS=Homo sapiens OX=9606 GN=HABP2 PE=1 SV=1	1	7	7	7	16.2	62.671	0	90938	107110	88365	0	102790	126180	142420	0	81742	107680	66435	133410
sp|Q14624|ITIH4_HUMAN;CON__Q3T052	ITIH4	sp|Q14624|ITIH4_HUMAN Inter-alpha-trypsin inhibitor heavy chain H4 OS=Homo sapiens OX=9606 GN=ITIH4 PE=1 SV=4	2	20	20	20	24.1	103.36	1700700	1273300	4208100	2244700	920930	2047100	3768200	4064600	1932000	1680400	2051900	1913600	1912800
sp|Q14691|PSF1_HUMAN	GINS1	sp|Q14691|PSF1_HUMAN DNA replication complex GINS protein PSF1 OS=Homo sapiens OX=9606 GN=GINS1 PE=1 SV=1	1	1	1	1	7.7	22.988	0	0	0	0	0	0	0	0	0	0	0	0	9088.6
sp|Q14697|GANAB_HUMAN	GANAB	sp|Q14697|GANAB_HUMAN Neutral alpha-glucosidase AB OS=Homo sapiens OX=9606 GN=GANAB PE=1 SV=3	1	7	7	7	9.9	106.87	0	50156	22775	43211	0	0	23999	0	0	0	0	88030	0
sp|Q14766|LTBP1_HUMAN	LTBP1	sp|Q14766|LTBP1_HUMAN Latent-transforming growth factor beta-binding protein 1 OS=Homo sapiens OX=9606 GN=LTBP1 PE=1 SV=4	1	4	4	4	3.7	186.79	0	38569	8677.9	0	0	0	0	0	0	0	0	0	0
sp|Q14767|LTBP2_HUMAN	LTBP2	sp|Q14767|LTBP2_HUMAN Latent-transforming growth factor beta-binding protein 2 OS=Homo sapiens OX=9606 GN=LTBP2 PE=1 SV=3	1	10	10	10	8.8	195.05	0	480150	0	21191	0	263560	14920	0	0	0	23744	0	0
sp|Q14847|LASP1_HUMAN	LASP1	sp|Q14847|LASP1_HUMAN LIM and SH3 domain protein 1 OS=Homo sapiens OX=9606 GN=LASP1 PE=1 SV=2	1	4	4	4	17.2	29.717	0	43750	24088	46141	0	0	90509	0	0	0	39773	49967	0
sp|Q14894|CRYM_HUMAN	CRYM	sp|Q14894|CRYM_HUMAN Ketimine reductase mu-crystallin OS=Homo sapiens OX=9606 GN=CRYM PE=1 SV=1	1	10	10	10	37.9	33.775	457270	838810	211890	1116800	1004800	156390	337370	84635	531330	0	427680	1221700	319770
sp|Q14974|IMB1_HUMAN	KPNB1	sp|Q14974|IMB1_HUMAN Importin subunit beta-1 OS=Homo sapiens OX=9606 GN=KPNB1 PE=1 SV=2	1	4	4	4	6.7	97.169	0	30747	28716	0	0	0	25968	0	0	0	0	44447	0
sp|Q15008|PSMD6_HUMAN	PSMD6	sp|Q15008|PSMD6_HUMAN 26S proteasome non-ATPase regulatory subunit 6 OS=Homo sapiens OX=9606 GN=PSMD6 PE=1 SV=1	1	2	2	2	5.9	45.531	0	0	0	0	0	0	0	0	0	0	0	44748	0
sp|Q15019|SEPT2_HUMAN	SEPTIN2	sp|Q15019|SEPT2_HUMAN Septin-2 OS=Homo sapiens OX=9606 GN=SEPTIN2 PE=1 SV=1	1	3	3	3	11.9	41.487	0	38996	0	0	0	0	20078	0	0	0	17791	39075	0
sp|Q15084|PDIA6_HUMAN	PDIA6	sp|Q15084|PDIA6_HUMAN Protein disulfide-isomerase A6 OS=Homo sapiens OX=9606 GN=PDIA6 PE=1 SV=1	1	3	3	3	10.5	48.121	0	59063	10722	0	0	0	13269	0	0	0	14088	44449	0
sp|Q15102|PA1B3_HUMAN	PAFAH1B3	sp|Q15102|PA1B3_HUMAN Platelet-activating factor acetylhydrolase IB subunit gamma OS=Homo sapiens OX=9606 GN=PAFAH1B3 PE=1 SV=1	1	4	4	4	19.9	25.734	0	41290	0	0	0	0	14970	0	0	0	19929	76965	0
sp|Q15113|PCOC1_HUMAN	PCOLCE	sp|Q15113|PCOC1_HUMAN Procollagen C-endopeptidase enhancer 1 OS=Homo sapiens OX=9606 GN=PCOLCE PE=1 SV=2	1	7	7	7	21.2	47.972	0	496850	135670	205770	0	216420	232030	97070	48114	0	78899	88114	60867
sp|Q15149|PLEC_HUMAN	PLEC	sp|Q15149|PLEC_HUMAN Plectin OS=Homo sapiens OX=9606 GN=PLEC PE=1 SV=3	1	28	28	28	6.7	531.78	0	77922	153800	208040	49596	63936	194620	186730	0	0	118270	406100	83985
sp|Q15181|IPYR_HUMAN	PPA1	sp|Q15181|IPYR_HUMAN Inorganic pyrophosphatase OS=Homo sapiens OX=9606 GN=PPA1 PE=1 SV=2	1	3	3	3	14.9	32.66	0	48458	22541	25580	0	0	27908	23114	0	0	31425	146030	0
sp|Q15257|PTPA_HUMAN	PTPA	sp|Q15257|PTPA_HUMAN Serine/threonine-protein phosphatase 2A activator OS=Homo sapiens OX=9606 GN=PTPA PE=1 SV=3	1	4	4	4	13.1	40.667	0	56698	57381	0	0	0	78048	61368	0	0	83530	82228	0
sp|Q15365|PCBP1_HUMAN;sp|Q15366|PCBP2_HUMAN;sp|P57721|PCBP3_HUMAN	PCBP1	sp|Q15365|PCBP1_HUMAN Poly(rC)-binding protein 1 OS=Homo sapiens OX=9606 GN=PCBP1 PE=1 SV=2;sp|Q15366|PCBP2_HUMAN Poly(rC)-binding protein 2 OS=Homo sapiens OX=9606 GN=PCBP2 PE=1 SV=1;sp|P57721|PCBP3_HUMAN Poly(rC)-binding protein 3 OS=Homo sapiens OX=9606	3	2	2	2	7.6	37.497	0	45194	0	0	0	0	0	0	0	0	10685	52362	0
sp|Q15370|ELOB_HUMAN	ELOB	sp|Q15370|ELOB_HUMAN Elongin-B OS=Homo sapiens OX=9606 GN=ELOB PE=1 SV=1	1	2	2	2	21.2	13.133	0	10085	0	0	0	0	0	7011.1	0	0	0	35179	0
sp|Q15435|PP1R7_HUMAN	PPP1R7	sp|Q15435|PP1R7_HUMAN Protein phosphatase 1 regulatory subunit 7 OS=Homo sapiens OX=9606 GN=PPP1R7 PE=1 SV=1	1	4	4	4	14.4	41.564	0	13199	12952	15236	0	0	10542	0	0	0	7904	57235	0
sp|Q15517|CDSN_HUMAN	CDSN	sp|Q15517|CDSN_HUMAN Corneodesmosin OS=Homo sapiens OX=9606 GN=CDSN PE=1 SV=3	1	2	2	2	5.1	51.522	0	0	0	0	0	22499	0	0	0	101890	52180	0	0
sp|Q15582|BGH3_HUMAN	TGFBI	sp|Q15582|BGH3_HUMAN Transforming growth factor-beta-induced protein ig-h3 OS=Homo sapiens OX=9606 GN=TGFBI PE=1 SV=1	1	7	7	7	11.9	74.68	0	74788	25394	25635	0	0	70443	0	0	0	30719	27935	0
sp|Q15631|TSN_HUMAN	TSN	sp|Q15631|TSN_HUMAN Translin OS=Homo sapiens OX=9606 GN=TSN PE=1 SV=1	1	1	1	1	6.6	26.183	0	0	0	0	0	0	0	0	0	0	0	8285.1	0
sp|Q15691|MARE1_HUMAN	MAPRE1	sp|Q15691|MARE1_HUMAN Microtubule-associated protein RP/EB family member 1 OS=Homo sapiens OX=9606 GN=MAPRE1 PE=1 SV=3	1	1	1	1	7.5	29.999	0	0	0	0	0	0	0	0	0	0	0	2091.6	0
sp|Q15714|T22D1_HUMAN	TSC22D1	sp|Q15714|T22D1_HUMAN TSC22 domain family protein 1 OS=Homo sapiens OX=9606 GN=TSC22D1 PE=1 SV=3	1	1	1	1	1.1	109.68	0	0	0	0	0	0	0	0	0	0	0	0	8298.5
sp|Q15782|CH3L2_HUMAN	CHI3L2	sp|Q15782|CH3L2_HUMAN Chitinase-3-like protein 2 OS=Homo sapiens OX=9606 GN=CHI3L2 PE=1 SV=1	1	8	8	8	25.6	43.5	0	1092600	10111	9261.4	0	0	5329.2	0	0	0	14166	8216.8	0
sp|Q15836|VAMP3_HUMAN;sp|P63027|VAMP2_HUMAN	VAMP3	sp|Q15836|VAMP3_HUMAN Vesicle-associated membrane protein 3 OS=Homo sapiens OX=9606 GN=VAMP3 PE=1 SV=3;sp|P63027|VAMP2_HUMAN Vesicle-associated membrane protein 2 OS=Homo sapiens OX=9606 GN=VAMP2 PE=1 SV=3	2	1	1	1	17	11.309	0	0	0	0	0	0	0	0	0	0	0	4493.6	0
sp|Q15847|ADIRF_HUMAN	ADIRF	sp|Q15847|ADIRF_HUMAN Adipogenesis regulatory factor OS=Homo sapiens OX=9606 GN=ADIRF PE=1 SV=1	1	1	1	1	18.4	7.8547	0	0	0	0	0	0	0	0	0	0	0	0	62769
sp|Q15848|ADIPO_HUMAN	ADIPOQ	sp|Q15848|ADIPO_HUMAN Adiponectin OS=Homo sapiens OX=9606 GN=ADIPOQ PE=1 SV=1	1	2	2	2	12.3	26.413	0	15519	100280	97552	0	0	113090	52164	0	13403	31423	32731	0
sp|Q16181|SEPT7_HUMAN	SEPTIN7	sp|Q16181|SEPT7_HUMAN Septin-7 OS=Homo sapiens OX=9606 GN=SEPTIN7 PE=1 SV=2	1	3	3	3	7.1	50.679	0	17681	7238.6	20093	0	10167	13790	9882.2	0	0	0	0	0
sp|Q16270|IBP7_HUMAN	IGFBP7	sp|Q16270|IBP7_HUMAN Insulin-like growth factor-binding protein 7 OS=Homo sapiens OX=9606 GN=IGFBP7 PE=1 SV=1	1	1	1	1	6	29.13	0	0	0	0	0	0	0	0	0	0	0	0	9337.3
sp|Q16401|PSMD5_HUMAN	PSMD5	sp|Q16401|PSMD5_HUMAN 26S proteasome non-ATPase regulatory subunit 5 OS=Homo sapiens OX=9606 GN=PSMD5 PE=1 SV=3	1	2	2	2	4.6	56.195	0	12955	0	0	0	0	9937.5	0	0	0	11810	24500	0
sp|Q16531|DDB1_HUMAN	DDB1	sp|Q16531|DDB1_HUMAN DNA damage-binding protein 1 OS=Homo sapiens OX=9606 GN=DDB1 PE=1 SV=1	1	2	2	2	3.9	126.97	0	0	14573	0	0	0	0	0	0	0	0	19114	0
sp|Q16543|CDC37_HUMAN	CDC37	sp|Q16543|CDC37_HUMAN Hsp90 co-chaperone Cdc37 OS=Homo sapiens OX=9606 GN=CDC37 PE=1 SV=1	1	1	1	1	4.5	44.468	0	0	0	0	0	0	0	0	0	0	0	12236	0
sp|Q16555|DPYL2_HUMAN;sp|Q14194|DPYL1_HUMAN	DPYSL2	sp|Q16555|DPYL2_HUMAN Dihydropyrimidinase-related protein 2 OS=Homo sapiens OX=9606 GN=DPYSL2 PE=1 SV=1	2	11	11	10	27.1	62.293	0	161390	113540	334820	0	0	155130	119910	0	0	166030	544020	211990
sp|Q16610|ECM1_HUMAN	ECM1	sp|Q16610|ECM1_HUMAN Extracellular matrix protein 1 OS=Homo sapiens OX=9606 GN=ECM1 PE=1 SV=2	1	3	3	3	7.4	60.673	0	0	76728	0	0	69160	73445	0	0	0	52476	0	0
sp|Q16651|PRSS8_HUMAN	PRSS8	sp|Q16651|PRSS8_HUMAN Prostasin OS=Homo sapiens OX=9606 GN=PRSS8 PE=1 SV=1	1	1	1	1	3.5	36.431	0	103100	0	0	0	0	0	0	0	0	0	0	0
sp|Q16658|FSCN1_HUMAN	FSCN1	sp|Q16658|FSCN1_HUMAN Fascin OS=Homo sapiens OX=9606 GN=FSCN1 PE=1 SV=3	1	11	11	11	24.5	54.529	378170	234050	214420	431010	138320	242160	203470	136080	125560	301300	196990	476660	163040
sp|Q16674|MIA_HUMAN	MIA	sp|Q16674|MIA_HUMAN Melanoma-derived growth regulatory protein OS=Homo sapiens OX=9606 GN=MIA PE=1 SV=1	1	3	3	3	21.4	14.509	0	1979600	159010	150260	0	189270	57261	214780	0	0	0	0	0
sp|Q16698|DECR_HUMAN	DECR1	sp|Q16698|DECR_HUMAN 2,4-dienoyl-CoA reductase, mitochondrial OS=Homo sapiens OX=9606 GN=DECR1 PE=1 SV=1	1	1	1	1	3.9	36.067	0	0	0	0	0	0	0	0	0	0	0	9083.8	0
sp|Q16769|QPCT_HUMAN	QPCT	sp|Q16769|QPCT_HUMAN Glutaminyl-peptide cyclotransferase OS=Homo sapiens OX=9606 GN=QPCT PE=1 SV=1	1	2	2	2	6.9	40.876	0	187130	0	0	0	0	0	0	0	0	0	0	0
sp|Q16775|GLO2_HUMAN	HAGH	sp|Q16775|GLO2_HUMAN Hydroxyacylglutathione hydrolase, mitochondrial OS=Homo sapiens OX=9606 GN=HAGH PE=1 SV=2	1	7	7	7	27.6	33.805	329000	166570	205760	98827	160530	187970	91263	141570	0	502940	140870	311420	127510
sp|Q16851|UGPA_HUMAN	UGP2	sp|Q16851|UGPA_HUMAN UTP--glucose-1-phosphate uridylyltransferase OS=Homo sapiens OX=9606 GN=UGP2 PE=1 SV=5	1	2	2	2	5.1	56.94	0	17631	0	0	0	0	39071	0	0	14526	0	70140	0
sp|Q16881|TRXR1_HUMAN	TXNRD1	sp|Q16881|TRXR1_HUMAN Thioredoxin reductase 1, cytoplasmic OS=Homo sapiens OX=9606 GN=TXNRD1 PE=1 SV=3	1	1	1	1	1.7	70.905	0	0	0	0	0	0	0	0	0	0	0	18132	0
sp|Q1KMD3|HNRL2_HUMAN	HNRNPUL2	sp|Q1KMD3|HNRL2_HUMAN Heterogeneous nuclear ribonucleoprotein U-like protein 2 OS=Homo sapiens OX=9606 GN=HNRNPUL2 PE=1 SV=1	1	1	1	1	1.7	85.104	0	0	0	0	0	0	0	0	0	0	0	15460	0
sp|Q2WEN9|CEA16_HUMAN	CEACAM16	sp|Q2WEN9|CEA16_HUMAN Carcinoembryonic antigen-related cell adhesion molecule 16 OS=Homo sapiens OX=9606 GN=CEACAM16 PE=1 SV=2	1	1	1	1	4.2	45.873	0	0	0	0	0	0	0	0	0	0	0	5385.8	0
sp|Q3KNS1|PTHD3_HUMAN	PTCHD3	sp|Q3KNS1|PTHD3_HUMAN Patched domain-containing protein 3 OS=Homo sapiens OX=9606 GN=PTCHD3 PE=1 SV=3	1	1	1	1	1.3	86.871	0	0	0	0	0	0	0	0	0	0	0	0	3787500
sp|Q3LXA3|TKFC_HUMAN	TKFC	sp|Q3LXA3|TKFC_HUMAN Triokinase/FMN cyclase OS=Homo sapiens OX=9606 GN=TKFC PE=1 SV=2	1	2	2	2	5.7	58.946	0	18740	0	0	0	0	0	0	0	0	0	16300	0
sp|Q52LJ0|FA98B_HUMAN	FAM98B	sp|Q52LJ0|FA98B_HUMAN Protein FAM98B OS=Homo sapiens OX=9606 GN=FAM98B PE=1 SV=2	1	1	1	1	5.3	45.547	0	0	0	0	0	0	0	0	0	0	0	0	67526
sp|Q53TN4|CYBR1_HUMAN	CYBRD1	sp|Q53TN4|CYBR1_HUMAN Cytochrome b reductase 1 OS=Homo sapiens OX=9606 GN=CYBRD1 PE=1 SV=1	1	1	1	1	4.2	31.641	0	0	0	0	0	0	0	0	0	0	0	0	31311
sp|Q562R1|ACTBL_HUMAN	ACTBL2	sp|Q562R1|ACTBL_HUMAN Beta-actin-like protein 2 OS=Homo sapiens OX=9606 GN=ACTBL2 PE=1 SV=2	1	4	1	1	14.1	42.003	1059700	0	0	0	0	0	0	0	0	0	0	0	0
sp|Q5SRE7|PHYD1_HUMAN	PHYHD1	sp|Q5SRE7|PHYD1_HUMAN Phytanoyl-CoA dioxygenase domain-containing protein 1 OS=Homo sapiens OX=9606 GN=PHYHD1 PE=1 SV=2	1	2	2	2	8.6	32.41	0	12043	0	0	0	0	0	0	0	0	0	15902	0
sp|Q5T749|KPRP_HUMAN	KPRP	sp|Q5T749|KPRP_HUMAN Keratinocyte proline-rich protein OS=Homo sapiens OX=9606 GN=KPRP PE=1 SV=1	1	9	9	9	16.9	64.135	214580	32548	134440	605280	1595700	1028400	106130	270500	369530	1059100	191520	190350	886840
sp|Q5T750|XP32_HUMAN	XP32	sp|Q5T750|XP32_HUMAN Skin-specific protein 32 OS=Homo sapiens OX=9606 GN=XP32 PE=1 SV=1	1	3	3	3	13.2	26.238	0	0	0	150930	0	316060	0	0	348480	0	0	0	104120
sp|Q5TDH0|DDI2_HUMAN;sp|Q8WTU0|DDI1_HUMAN	DDI2	sp|Q5TDH0|DDI2_HUMAN Protein DDI1 homolog 2 OS=Homo sapiens OX=9606 GN=DDI2 PE=1 SV=1	2	6	6	6	22.3	44.522	0	70329	67132	85268	43243	51640	54783	20226	0	0	100550	143040	0
sp|Q5TZA2|CROCC_HUMAN	CROCC	sp|Q5TZA2|CROCC_HUMAN Rootletin OS=Homo sapiens OX=9606 GN=CROCC PE=1 SV=1	1	1	1	1	0.6	228.52	0	0	541960	0	0	0	0	0	0	1334800	0	0	1356000
sp|Q5VVQ6|OTU1_HUMAN	YOD1	sp|Q5VVQ6|OTU1_HUMAN Ubiquitin thioesterase OTU1 OS=Homo sapiens OX=9606 GN=YOD1 PE=1 SV=1	1	2	2	2	8	38.322	0	5638.1	0	0	0	0	0	0	0	0	0	0	0
sp|Q66K66|TM198_HUMAN	TMEM198	sp|Q66K66|TM198_HUMAN Transmembrane protein 198 OS=Homo sapiens OX=9606 GN=TMEM198 PE=1 SV=1	1	1	1	1	2.5	39.474	0	0	0	4879800	0	0	0	0	0	0	0	0	0
sp|Q687X5|STEA4_HUMAN	STEAP4	sp|Q687X5|STEA4_HUMAN Metalloreductase STEAP4 OS=Homo sapiens OX=9606 GN=STEAP4 PE=1 SV=1	1	5	5	5	17.6	51.981	0	113170	0	0	0	0	0	0	0	0	0	0	0
sp|Q6EMK4|VASN_HUMAN	VASN	sp|Q6EMK4|VASN_HUMAN Vasorin OS=Homo sapiens OX=9606 GN=VASN PE=1 SV=1	1	4	4	4	7.3	71.712	0	30742	36944	57169	0	0	64416	35005	0	0	20780	39504	0
sp|Q6FHJ7|SFRP4_HUMAN	SFRP4	sp|Q6FHJ7|SFRP4_HUMAN Secreted frizzled-related protein 4 OS=Homo sapiens OX=9606 GN=SFRP4 PE=1 SV=2	1	2	2	2	6.9	39.826	0	109140	12828	0	0	0	0	0	0	0	0	0	0
sp|Q6GMV3|PTRD1_HUMAN	PTRHD1	sp|Q6GMV3|PTRD1_HUMAN Putative peptidyl-tRNA hydrolase PTRHD1 OS=Homo sapiens OX=9606 GN=PTRHD1 PE=1 SV=1	1	1	1	1	10	15.805	0	0	0	0	0	0	6604.1	0	0	0	0	0	0
sp|Q6IBS0|TWF2_HUMAN	TWF2	sp|Q6IBS0|TWF2_HUMAN Twinfilin-2 OS=Homo sapiens OX=9606 GN=TWF2 PE=1 SV=2	1	2	2	2	9.2	39.548	0	0	0	0	0	0	0	0	0	0	0	15172	0
sp|Q6NZI2|CAVN1_HUMAN	CAVIN1	sp|Q6NZI2|CAVN1_HUMAN Caveolae-associated protein 1 OS=Homo sapiens OX=9606 GN=CAVIN1 PE=1 SV=1	1	1	1	1	4.6	43.476	0	0	0	0	0	0	0	0	0	0	0	4472.2	0
sp|Q6S8J3|POTEE_HUMAN;sp|P0CG38|POTEI_HUMAN;sp|Q9BYX7|ACTBM_HUMAN;sp|P0CG39|POTEJ_HUMAN	POTEE	sp|Q6S8J3|POTEE_HUMAN POTE ankyrin domain family member E OS=Homo sapiens OX=9606 GN=POTEE PE=2 SV=3;sp|P0CG38|POTEI_HUMAN POTE ankyrin domain family member I OS=Homo sapiens OX=9606 GN=POTEI PE=3 SV=1;sp|Q9BYX7|ACTBM_HUMAN Putative beta-actin-like protein	4	6	1	1	7.2	121.36	0	0	0	0	0	0	0	0	0	358850	0	0	0
sp|Q6UWP8|SBSN_HUMAN	SBSN	sp|Q6UWP8|SBSN_HUMAN Suprabasin OS=Homo sapiens OX=9606 GN=SBSN PE=1 SV=2	1	6	6	6	25.6	60.54	0	0	0	0	302740	0	0	32211	0	69669	0	0	223080
sp|Q6UWR7|ENPP6_HUMAN	ENPP6	sp|Q6UWR7|ENPP6_HUMAN Glycerophosphocholine cholinephosphodiesterase ENPP6 OS=Homo sapiens OX=9606 GN=ENPP6 PE=1 SV=2	1	4	4	4	11.4	50.24	0	37265	68298	149350	0	0	25314	19310	0	0	51213	82996	0
sp|Q6UWY5|OLFL1_HUMAN	OLFML1	sp|Q6UWY5|OLFL1_HUMAN Olfactomedin-like protein 1 OS=Homo sapiens OX=9606 GN=OLFML1 PE=1 SV=2	1	2	2	2	5	45.95	0	20056	24668	0	0	0	33755	0	0	0	0	0	0
sp|Q6UX71|PXDC2_HUMAN	PLXDC2	sp|Q6UX71|PXDC2_HUMAN Plexin domain-containing protein 2 OS=Homo sapiens OX=9606 GN=PLXDC2 PE=1 SV=1	1	3	3	3	7.4	59.582	0	44815	39958	0	0	0	39192	0	0	0	0	22052	0
sp|Q6UXB8|PI16_HUMAN	PI16	sp|Q6UXB8|PI16_HUMAN Peptidase inhibitor 16 OS=Homo sapiens OX=9606 GN=PI16 PE=1 SV=1	1	5	5	5	13.4	49.471	0	32349	84240	88270	0	0	109220	27024	0	0	24589	0	0
sp|Q6W4X9|MUC6_HUMAN	MUC6	sp|Q6W4X9|MUC6_HUMAN Mucin-6 OS=Homo sapiens OX=9606 GN=MUC6 PE=1 SV=3	1	21	21	21	12.4	257.05	0	851310	0	7247.5	0	0	0	0	0	0	0	0	0
sp|Q6X4U4|SOSD1_HUMAN	SOSTDC1	sp|Q6X4U4|SOSD1_HUMAN Sclerostin domain-containing protein 1 OS=Homo sapiens OX=9606 GN=SOSTDC1 PE=1 SV=2	1	2	2	2	12.1	23.306	0	71162	0	0	0	0	0	0	0	0	0	0	0
sp|Q6XQN6|PNCB_HUMAN	NAPRT	sp|Q6XQN6|PNCB_HUMAN Nicotinate phosphoribosyltransferase OS=Homo sapiens OX=9606 GN=NAPRT PE=1 SV=2	1	2	2	2	3.9	57.578	0	0	0	0	0	0	14279	0	0	0	0	28738	0
sp|Q6ZMP0|THSD4_HUMAN	THSD4	sp|Q6ZMP0|THSD4_HUMAN Thrombospondin type-1 domain-containing protein 4 OS=Homo sapiens OX=9606 GN=THSD4 PE=2 SV=2	1	1	1	1	1.5	112.45	0	5815.4	0	0	0	0	0	0	0	0	0	0	0
sp|Q719H9|KCTD1_HUMAN	KCTD1	sp|Q719H9|KCTD1_HUMAN BTB/POZ domain-containing protein KCTD1 OS=Homo sapiens OX=9606 GN=KCTD1 PE=1 SV=1	1	1	1	1	3.1	29.404	0	0	0	0	0	0	0	0	0	0	0	0	18499
sp|Q7L5N1|CSN6_HUMAN	COPS6	sp|Q7L5N1|CSN6_HUMAN COP9 signalosome complex subunit 6 OS=Homo sapiens OX=9606 GN=COPS6 PE=1 SV=1	1	1	1	1	7.3	36.163	0	0	0	0	0	0	0	0	0	0	0	9994.1	0
sp|Q7LGC8|CHST3_HUMAN	CHST3	sp|Q7LGC8|CHST3_HUMAN Carbohydrate sulfotransferase 3 OS=Homo sapiens OX=9606 GN=CHST3 PE=1 SV=3	1	1	1	1	2.9	54.705	0	12285	0	0	0	0	0	0	0	0	0	0	0
sp|Q7Z2Y5|NRK_HUMAN	NRK	sp|Q7Z2Y5|NRK_HUMAN Nik-related protein kinase OS=Homo sapiens OX=9606 GN=NRK PE=1 SV=2	1	1	1	1	0.6	178.48	0	0	0	0	0	0	0	0	0	0	0	0	204930
sp|Q7Z4H3|HDDC2_HUMAN	HDDC2	sp|Q7Z4H3|HDDC2_HUMAN HD domain-containing protein 2 OS=Homo sapiens OX=9606 GN=HDDC2 PE=1 SV=1	1	2	2	2	13.2	23.39	0	5863.9	5971.7	0	0	0	0	0	0	0	0	22162	0
sp|Q7Z4V5|HDGR2_HUMAN	HDGFL2	sp|Q7Z4V5|HDGR2_HUMAN Hepatoma-derived growth factor-related protein 2 OS=Homo sapiens OX=9606 GN=HDGFL2 PE=1 SV=1	1	1	1	1	2.2	74.316	0	0	0	0	0	0	0	0	0	0	0	5242.8	0
sp|Q7Z4W1|DCXR_HUMAN	DCXR	sp|Q7Z4W1|DCXR_HUMAN L-xylulose reductase OS=Homo sapiens OX=9606 GN=DCXR PE=1 SV=2	1	2	2	2	9	25.913	0	9518.9	0	0	0	0	11077	8883.1	0	0	0	28771	0
sp|Q7Z745|MRO2B_HUMAN	MROH2B	sp|Q7Z745|MRO2B_HUMAN Maestro heat-like repeat-containing protein family member 2B OS=Homo sapiens OX=9606 GN=MROH2B PE=2 SV=3	1	1	1	1	0.6	180.78	0	0	0	0	0	0	0	0	0	0	0	0	91403
sp|Q7Z7M0|MEGF8_HUMAN	MEGF8	sp|Q7Z7M0|MEGF8_HUMAN Multiple epidermal growth factor-like domains protein 8 OS=Homo sapiens OX=9606 GN=MEGF8 PE=1 SV=2	1	2	2	2	0.8	303.1	0	11368	0	0	0	0	0	0	0	0	0	0	0
sp|Q86SF2|GALT7_HUMAN	GALNT7	sp|Q86SF2|GALT7_HUMAN N-acetylgalactosaminyltransferase 7 OS=Homo sapiens OX=9606 GN=GALNT7 PE=1 SV=1	1	1	1	1	3	75.388	0	19984	0	0	0	0	0	0	0	0	0	0	0
sp|Q86SG5|S1A7A_HUMAN	S100A7A	sp|Q86SG5|S1A7A_HUMAN Protein S100-A7A OS=Homo sapiens OX=9606 GN=S100A7A PE=1 SV=3	1	3	1	1	23.8	11.305	0	0	0	0	0	0	0	36776	0	0	0	0	0
sp|Q86SQ4|AGRG6_HUMAN	ADGRG6	sp|Q86SQ4|AGRG6_HUMAN Adhesion G-protein coupled receptor G6 OS=Homo sapiens OX=9606 GN=ADGRG6 PE=1 SV=3	1	6	6	6	6.4	136.69	0	348410	18738	50472	0	54130	0	0	0	0	36542	0	0
sp|Q86UE6|LRRT1_HUMAN	LRRTM1	sp|Q86UE6|LRRT1_HUMAN Leucine-rich repeat transmembrane neuronal protein 1 OS=Homo sapiens OX=9606 GN=LRRTM1 PE=2 SV=2	1	2	2	2	5	58.64	0	30503	0	0	0	0	0	0	0	0	0	0	0
sp|Q86VB7|C163A_HUMAN	CD163	sp|Q86VB7|C163A_HUMAN Scavenger receptor cysteine-rich type 1 protein M130 OS=Homo sapiens OX=9606 GN=CD163 PE=1 SV=2	1	4	4	4	4.3	125.45	0	41305	39929	44797	0	0	34578	0	0	0	30754	26171	0
sp|Q86VP6|CAND1_HUMAN	CAND1	sp|Q86VP6|CAND1_HUMAN Cullin-associated NEDD8-dissociated protein 1 OS=Homo sapiens OX=9606 GN=CAND1 PE=1 SV=2	1	6	6	6	6.6	136.37	0	46996	23162	28832	0	0	22201	0	0	0	40404	30424	0
sp|Q86X29|LSR_HUMAN	LSR	sp|Q86X29|LSR_HUMAN Lipolysis-stimulated lipoprotein receptor OS=Homo sapiens OX=9606 GN=LSR PE=1 SV=4	1	1	1	1	2.2	71.438	0	0	0	0	0	0	0	0	0	0	4218.6	0	0
sp|Q86X55|CARM1_HUMAN	CARM1	sp|Q86X55|CARM1_HUMAN Histone-arginine methyltransferase CARM1 OS=Homo sapiens OX=9606 GN=CARM1 PE=1 SV=3	1	1	1	1	2.5	65.853	0	0	0	0	0	0	0	0	0	0	0	12461	0
sp|Q86XI8|ZSWM9_HUMAN	ZSWIM9	sp|Q86XI8|ZSWM9_HUMAN Uncharacterized protein ZSWIM9 OS=Homo sapiens OX=9606 GN=ZSWIM9 PE=1 SV=2	1	1	1	1	1.6	70.072	0	0	0	0	0	0	0	0	0	0	0	0	175470
sp|Q8IWY4|SCUB1_HUMAN	SCUBE1	sp|Q8IWY4|SCUB1_HUMAN Signal peptide, CUB and EGF-like domain-containing protein 1 OS=Homo sapiens OX=9606 GN=SCUBE1 PE=1 SV=3	1	1	1	1	1.8	107.91	0	0	0	0	0	0	0	0	0	0	0	2500.8	0
sp|Q8IYT4|KATL2_HUMAN	KATNAL2	sp|Q8IYT4|KATL2_HUMAN Katanin p60 ATPase-containing subunit A-like 2 OS=Homo sapiens OX=9606 GN=KATNAL2 PE=1 SV=3	1	1	1	1	2.2	61.252	0	0	0	0	0	0	0	0	0	0	0	0	47967
sp|Q8N2S1|LTBP4_HUMAN	LTBP4	sp|Q8N2S1|LTBP4_HUMAN Latent-transforming growth factor beta-binding protein 4 OS=Homo sapiens OX=9606 GN=LTBP4 PE=1 SV=2	1	4	4	4	3.3	173.43	0	36529	0	18774	0	0	0	0	0	0	0	0	0
sp|Q8N436|CPXM2_HUMAN;sp|Q8IUX7|AEBP1_HUMAN	CPXM2	sp|Q8N436|CPXM2_HUMAN Inactive carboxypeptidase-like protein X2 OS=Homo sapiens OX=9606 GN=CPXM2 PE=2 SV=3	2	15	15	15	24.6	85.869	0	810390	4007.9	4003.6	0	12976	10490	0	0	0	36453	2449.6	0
sp|Q8NBS9|TXND5_HUMAN	TXNDC5	sp|Q8NBS9|TXND5_HUMAN Thioredoxin domain-containing protein 5 OS=Homo sapiens OX=9606 GN=TXNDC5 PE=1 SV=2	1	2	2	2	5.8	47.628	0	0	0	0	0	0	0	0	0	0	16818	0	0
sp|Q8NE71|ABCF1_HUMAN	ABCF1	sp|Q8NE71|ABCF1_HUMAN ATP-binding cassette sub-family F member 1 OS=Homo sapiens OX=9606 GN=ABCF1 PE=1 SV=2	1	1	1	1	1.3	95.925	0	0	0	0	0	0	0	0	0	0	0	0	4916600
sp|Q8NF91|SYNE1_HUMAN	SYNE1	sp|Q8NF91|SYNE1_HUMAN Nesprin-1 OS=Homo sapiens OX=9606 GN=SYNE1 PE=1 SV=4	1	1	1	1	0.1	1011.1	0	0	0	0	0	0	0	0	0	0	0	0	138870
sp|Q8NFU4|FDSCP_HUMAN	FDCSP	sp|Q8NFU4|FDSCP_HUMAN Follicular dendritic cell secreted peptide OS=Homo sapiens OX=9606 GN=FDCSP PE=1 SV=1	1	1	1	1	10.6	9.7002	0	0	0	0	0	0	0	0	0	0	618540	0	0
sp|Q8NHW5|RLA0L_HUMAN;sp|P05388|RLA0_HUMAN	RPLP0P6	sp|Q8NHW5|RLA0L_HUMAN 60S acidic ribosomal protein P0-like OS=Homo sapiens OX=9606 GN=RPLP0P6 PE=5 SV=1;sp|P05388|RLA0_HUMAN 60S acidic ribosomal protein P0 OS=Homo sapiens OX=9606 GN=RPLP0 PE=1 SV=1	2	4	4	4	17.4	34.364	0	52033	0	91334	0	0	45037	0	0	0	0	77279	0
sp|Q8TDL5|BPIB1_HUMAN	BPIFB1	sp|Q8TDL5|BPIB1_HUMAN BPI fold-containing family B member 1 OS=Homo sapiens OX=9606 GN=BPIFB1 PE=1 SV=1	1	20	20	20	51.4	52.441	0	12442000	72740	97511	0	280260	176550	13396	0	0	924640	0	0
sp|Q8TDQ7|GNPI2_HUMAN;sp|P46926|GNPI1_HUMAN	GNPDA2	sp|Q8TDQ7|GNPI2_HUMAN Glucosamine-6-phosphate isomerase 2 OS=Homo sapiens OX=9606 GN=GNPDA2 PE=1 SV=1;sp|P46926|GNPI1_HUMAN Glucosamine-6-phosphate isomerase 1 OS=Homo sapiens OX=9606 GN=GNPDA1 PE=1 SV=1	2	2	2	2	11.6	31.084	0	8667.3	0	0	0	0	0	0	0	0	0	21132	0
sp|Q8TF72|SHRM3_HUMAN	SHROOM3	sp|Q8TF72|SHRM3_HUMAN Protein Shroom3 OS=Homo sapiens OX=9606 GN=SHROOM3 PE=1 SV=2	1	1	1	1	0.5	216.85	0	0	0	0	0	0	0	0	0	0	0	0	7745100
sp|Q8WUJ3|CEMIP_HUMAN	CEMIP	sp|Q8WUJ3|CEMIP_HUMAN Cell migration-inducing and hyaluronan-binding protein OS=Homo sapiens OX=9606 GN=CEMIP PE=1 SV=2	1	6	6	6	5.2	153	0	104980	0	0	0	0	0	0	0	0	0	0	0
sp|Q8WUM4|PDC6I_HUMAN	PDCD6IP	sp|Q8WUM4|PDC6I_HUMAN Programmed cell death 6-interacting protein OS=Homo sapiens OX=9606 GN=PDCD6IP PE=1 SV=1	1	13	13	13	18.7	96.022	0	190220	17013	30758	0	0	36771	13636	0	0	32275	134490	0
sp|Q8WXI7|MUC16_HUMAN	MUC16	sp|Q8WXI7|MUC16_HUMAN Mucin-16 OS=Homo sapiens OX=9606 GN=MUC16 PE=1 SV=3	1	1	1	1	0.3	1519.2	0	15435	0	0	0	0	0	0	0	0	0	0	0
sp|Q8WYH8|ING5_HUMAN;sp|Q9UNL4|ING4_HUMAN	ING5	sp|Q8WYH8|ING5_HUMAN Inhibitor of growth protein 5 OS=Homo sapiens OX=9606 GN=ING5 PE=1 SV=1;sp|Q9UNL4|ING4_HUMAN Inhibitor of growth protein 4 OS=Homo sapiens OX=9606 GN=ING4 PE=1 SV=1	2	1	1	1	5.4	27.75	0	0	0	0	0	0	0	0	0	0	0	0	637210
sp|Q92485|ASM3B_HUMAN	SMPDL3B	sp|Q92485|ASM3B_HUMAN Acid sphingomyelinase-like phosphodiesterase 3b OS=Homo sapiens OX=9606 GN=SMPDL3B PE=1 SV=2	1	3	3	3	7.9	50.813	0	24145	0	0	0	0	0	0	0	0	0	0	0
sp|Q92530|PSMF1_HUMAN	PSMF1	sp|Q92530|PSMF1_HUMAN Proteasome inhibitor PI31 subunit OS=Homo sapiens OX=9606 GN=PSMF1 PE=1 SV=2	1	2	2	2	10	29.816	0	59467	16566	0	0	0	40918	26527	0	0	32008	96942	0
sp|Q92563|TICN2_HUMAN	SPOCK2	sp|Q92563|TICN2_HUMAN Testican-2 OS=Homo sapiens OX=9606 GN=SPOCK2 PE=1 SV=1	1	10	10	10	22.6	46.779	35622	659590	19808	111700	0	0	25534	12149	0	0	237770	22441	0
sp|Q92597|NDRG1_HUMAN	NDRG1	sp|Q92597|NDRG1_HUMAN Protein NDRG1 OS=Homo sapiens OX=9606 GN=NDRG1 PE=1 SV=1	1	5	5	5	19.3	42.835	0	54760	33898	44889	198420	58253	40964	89843	0	0	49364	115360	53246
sp|Q92743|HTRA1_HUMAN	HTRA1	sp|Q92743|HTRA1_HUMAN Serine protease HTRA1 OS=Homo sapiens OX=9606 GN=HTRA1 PE=1 SV=1	1	1	1	1	2.9	51.286	0	0	0	0	0	0	0	0	0	0	4364.2	0	0
sp|Q92820|GGH_HUMAN	GGH	sp|Q92820|GGH_HUMAN Gamma-glutamyl hydrolase OS=Homo sapiens OX=9606 GN=GGH PE=1 SV=2	1	2	2	2	7.9	35.964	0	27838	29479	31121	0	0	26557	28290	0	36792	21944	22468	0
sp|Q92876|KLK6_HUMAN	KLK6	sp|Q92876|KLK6_HUMAN Kallikrein-6 OS=Homo sapiens OX=9606 GN=KLK6 PE=1 SV=1	1	4	4	4	25	26.855	0	75998	15745	0	0	0	10446	0	0	0	128650	11457	0
sp|Q93034|CUL5_HUMAN	CUL5	sp|Q93034|CUL5_HUMAN Cullin-5 OS=Homo sapiens OX=9606 GN=CUL5 PE=1 SV=4	1	1	1	1	2.3	90.954	0	0	0	0	0	0	0	0	0	0	614260	0	0
sp|Q969E4|TCAL3_HUMAN;sp|Q6IPX3|TCAL6_HUMAN;sp|Q5H9L2|TCAL5_HUMAN	TCEAL3	sp|Q969E4|TCAL3_HUMAN Transcription elongation factor A protein-like 3 OS=Homo sapiens OX=9606 GN=TCEAL3 PE=1 SV=1;sp|Q6IPX3|TCAL6_HUMAN Transcription elongation factor A protein-like 6 OS=Homo sapiens OX=9606 GN=TCEAL6 PE=2 SV=1;sp|Q5H9L2|TCAL5_HUMAN Tran	3	1	1	1	4.5	22.502	0	0	0	0	0	0	0	0	0	0	0	10275	0
sp|Q96C23|GALM_HUMAN	GALM	sp|Q96C23|GALM_HUMAN Aldose 1-epimerase OS=Homo sapiens OX=9606 GN=GALM PE=1 SV=1	1	4	4	4	13.5	37.765	0	31343	0	90106	0	40152	33857	0	0	28533	44090	85250	0
sp|Q96C86|DCPS_HUMAN	DCPS	sp|Q96C86|DCPS_HUMAN m7GpppX diphosphatase OS=Homo sapiens OX=9606 GN=DCPS PE=1 SV=2	1	1	1	1	4.5	38.608	0	0	0	0	0	0	0	0	0	0	0	2414.5	0
sp|Q96CX2|KCD12_HUMAN	KCTD12	sp|Q96CX2|KCD12_HUMAN BTB/POZ domain-containing protein KCTD12 OS=Homo sapiens OX=9606 GN=KCTD12 PE=1 SV=1	1	5	5	5	21.5	35.7	0	31565	65275	255370	0	0	54781	32443	0	0	32095	174980	49524
sp|Q96DG6|CMBL_HUMAN	CMBL	sp|Q96DG6|CMBL_HUMAN Carboxymethylenebutenolidase homolog OS=Homo sapiens OX=9606 GN=CMBL PE=1 SV=1	1	4	4	4	18	28.048	0	25273	15929	16625	0	0	18099	22863	0	0	57273	99431	0
sp|Q96F85|CNRP1_HUMAN	CNRIP1	sp|Q96F85|CNRP1_HUMAN CB1 cannabinoid receptor-interacting protein 1 OS=Homo sapiens OX=9606 GN=CNRIP1 PE=1 SV=1	1	1	1	1	9.8	18.648	0	0	0	0	0	0	0	0	0	0	0	45258	0
sp|Q96FQ6|S10AG_HUMAN	S100A16	sp|Q96FQ6|S10AG_HUMAN Protein S100-A16 OS=Homo sapiens OX=9606 GN=S100A16 PE=1 SV=1	1	1	1	1	11.7	11.801	0	0	0	14539	66667	19162	0	0	0	11473	8076	0	46370
sp|Q96FV2|SCRN2_HUMAN	SCRN2	sp|Q96FV2|SCRN2_HUMAN Secernin-2 OS=Homo sapiens OX=9606 GN=SCRN2 PE=1 SV=3	1	2	2	2	4.9	46.596	0	3855.6	0	0	0	0	0	0	0	0	0	23767	0
sp|Q96FW1|OTUB1_HUMAN	OTUB1	sp|Q96FW1|OTUB1_HUMAN Ubiquitin thioesterase OTUB1 OS=Homo sapiens OX=9606 GN=OTUB1 PE=1 SV=2	1	3	3	3	14.4	31.284	0	26635	31345	43011	0	0	24043	25940	0	0	27610	61685	18438
sp|Q96G03|PGM2_HUMAN	PGM2	sp|Q96G03|PGM2_HUMAN Phosphoglucomutase-2 OS=Homo sapiens OX=9606 GN=PGM2 PE=1 SV=4	1	7	7	7	13.7	68.283	0	60826	55924	44086	0	0	74730	49324	0	83272	56383	168810	37657
sp|Q96GD0|PLPP_HUMAN	PDXP	sp|Q96GD0|PLPP_HUMAN Pyridoxal phosphate phosphatase OS=Homo sapiens OX=9606 GN=PDXP PE=1 SV=2	1	3	3	3	14.9	31.698	0	30156	23038	0	0	0	0	33106	0	0	14331	37261	0
sp|Q96IU4|ABHEB_HUMAN	ABHD14B	sp|Q96IU4|ABHEB_HUMAN Protein ABHD14B OS=Homo sapiens OX=9606 GN=ABHD14B PE=1 SV=1	1	5	5	5	32.9	22.345	0	114550	72983	0	0	0	114240	56619	0	0	69415	277580	0
sp|Q96IY4|CBPB2_HUMAN	CPB2	sp|Q96IY4|CBPB2_HUMAN Carboxypeptidase B2 OS=Homo sapiens OX=9606 GN=CPB2 PE=1 SV=2	1	3	3	3	8.5	48.424	0	25805	66248	39961	0	0	158710	68203	0	0	39589	49501	0
sp|Q96JB6|LOXL4_HUMAN	LOXL4	sp|Q96JB6|LOXL4_HUMAN Lysyl oxidase homolog 4 OS=Homo sapiens OX=9606 GN=LOXL4 PE=1 SV=1	1	5	5	5	9.1	84.483	0	56863	0	0	0	0	0	0	0	0	0	0	0
sp|Q96KN2|CNDP1_HUMAN	CNDP1	sp|Q96KN2|CNDP1_HUMAN Beta-Ala-His dipeptidase OS=Homo sapiens OX=9606 GN=CNDP1 PE=1 SV=4	1	7	7	7	17	56.705	0	50918	87838	35837	0	0	130150	60999	0	0	119280	40765	0
sp|Q96KP4|CNDP2_HUMAN	CNDP2	sp|Q96KP4|CNDP2_HUMAN Cytosolic non-specific dipeptidase OS=Homo sapiens OX=9606 GN=CNDP2 PE=1 SV=2	1	9	9	9	25.7	52.878	0	100780	26940	240860	0	0	84342	42526	0	0	98917	263910	48575
sp|Q96NL6|SCLT1_HUMAN	SCLT1	sp|Q96NL6|SCLT1_HUMAN Sodium channel and clathrin linker 1 OS=Homo sapiens OX=9606 GN=SCLT1 PE=1 SV=2	1	1	1	1	1.2	80.909	0	0	0	0	0	0	0	0	0	0	0	0	114080
sp|Q96P63|SPB12_HUMAN	SERPINB12	sp|Q96P63|SPB12_HUMAN Serpin B12 OS=Homo sapiens OX=9606 GN=SERPINB12 PE=1 SV=1	1	5	5	5	13.1	46.276	0	0	0	88201	341710	110070	48374	0	99112	57074	28392	0	183740
sp|Q96PD5|PGRP2_HUMAN;CON__ENSEMBL:ENSBTAP00000016285	PGLYRP2	sp|Q96PD5|PGRP2_HUMAN N-acetylmuramoyl-L-alanine amidase OS=Homo sapiens OX=9606 GN=PGLYRP2 PE=1 SV=1	2	7	7	7	20.8	62.216	0	576050	290400	148310	0	141270	651260	354450	0	0	242650	272170	182030
sp|Q96RM1|SPR2F_HUMAN;sp|P35326|SPR2A_HUMAN;sp|P35325|SPR2B_HUMAN;sp|P22532|SPR2D_HUMAN;sp|P22531|SPR2E_HUMAN;sp|Q9BYE4|SPR2G_HUMAN	SPRR2F	sp|Q96RM1|SPR2F_HUMAN Small proline-rich protein 2F OS=Homo sapiens OX=9606 GN=SPRR2F PE=3 SV=1;sp|P35326|SPR2A_HUMAN Small proline-rich protein 2A OS=Homo sapiens OX=9606 GN=SPRR2A PE=1 SV=1;sp|P35325|SPR2B_HUMAN Small proline-rich protein 2B OS=Homo sapi	6	1	1	1	12.5	7.8052	0	0	0	0	0	0	0	0	0	0	0	0	11608
sp|Q96RT8|GCP5_HUMAN	TUBGCP5	sp|Q96RT8|GCP5_HUMAN Gamma-tubulin complex component 5 OS=Homo sapiens OX=9606 GN=TUBGCP5 PE=1 SV=1	1	1	1	1	0.9	118.32	0	0	0	0	0	0	0	0	0	0	0	0	288630
sp|Q96S96|PEBP4_HUMAN	PEBP4	sp|Q96S96|PEBP4_HUMAN Phosphatidylethanolamine-binding protein 4 OS=Homo sapiens OX=9606 GN=PEBP4 PE=1 SV=3	1	2	2	2	13.2	25.733	0	30571	0	0	0	0	0	0	0	0	0	0	0
sp|Q96T91|GPHA2_HUMAN	GPHA2	sp|Q96T91|GPHA2_HUMAN Glycoprotein hormone alpha-2 OS=Homo sapiens OX=9606 GN=GPHA2 PE=1 SV=1	1	3	3	3	34.1	14.163	0	0	0	0	0	0	0	119160	0	0	3701.1	0	0
sp|Q96TA1|NIBA2_HUMAN	NIBAN2	sp|Q96TA1|NIBA2_HUMAN Protein Niban 2 OS=Homo sapiens OX=9606 GN=NIBAN2 PE=1 SV=3	1	1	1	1	1.7	84.137	0	0	0	0	0	0	0	0	0	0	0	11212	0
sp|Q99426|TBCB_HUMAN	TBCB	sp|Q99426|TBCB_HUMAN Tubulin-folding cofactor B OS=Homo sapiens OX=9606 GN=TBCB PE=1 SV=2	1	2	2	2	8.2	27.325	0	0	0	0	0	0	5551.2	0	0	0	10800	33631	0
sp|Q99436|PSB7_HUMAN	PSMB7	sp|Q99436|PSB7_HUMAN Proteasome subunit beta type-7 OS=Homo sapiens OX=9606 GN=PSMB7 PE=1 SV=1	1	2	2	2	7.6	29.965	0	0	0	0	0	0	0	0	0	0	0	0	27906
sp|Q99497|PARK7_HUMAN	PARK7	sp|Q99497|PARK7_HUMAN Protein/nucleic acid deglycase DJ-1 OS=Homo sapiens OX=9606 GN=PARK7 PE=1 SV=2	1	6	6	6	42.3	19.891	561150	371780	311760	436420	317840	205950	317030	392810	197750	970920	341040	655730	259090
sp|Q99536|VAT1_HUMAN	VAT1	sp|Q99536|VAT1_HUMAN Synaptic vesicle membrane protein VAT-1 homolog OS=Homo sapiens OX=9606 GN=VAT1 PE=1 SV=2	1	5	5	5	18.8	41.92	0	68786	57538	52657	0	0	72867	0	0	0	52261	165490	0
sp|Q99574|NEUS_HUMAN	SERPINI1	sp|Q99574|NEUS_HUMAN Neuroserpin OS=Homo sapiens OX=9606 GN=SERPINI1 PE=1 SV=1	1	1	1	1	3.2	46.426	0	10604	0	0	0	0	0	0	0	0	0	0	0
sp|Q99584|S10AD_HUMAN	S100A13	sp|Q99584|S10AD_HUMAN Protein S100-A13 OS=Homo sapiens OX=9606 GN=S100A13 PE=1 SV=1	1	2	2	2	23.5	11.471	0	32213	34901	42900	0	0	86552	0	0	0	29078	49481	0
sp|Q99623|PHB2_HUMAN	PHB2	sp|Q99623|PHB2_HUMAN Prohibitin-2 OS=Homo sapiens OX=9606 GN=PHB2 PE=1 SV=2	1	1	1	1	4	33.296	0	0	0	0	0	0	0	0	0	0	0	25908	0
sp|Q99627|CSN8_HUMAN	COPS8	sp|Q99627|CSN8_HUMAN COP9 signalosome complex subunit 8 OS=Homo sapiens OX=9606 GN=COPS8 PE=1 SV=1	1	2	2	2	13.9	23.225	0	0	0	0	0	0	0	0	0	0	0	19706	0
sp|Q99733|NP1L4_HUMAN;sp|P55209|NP1L1_HUMAN	NAP1L4	sp|Q99733|NP1L4_HUMAN Nucleosome assembly protein 1-like 4 OS=Homo sapiens OX=9606 GN=NAP1L4 PE=1 SV=1	2	5	5	5	14.9	42.823	0	25437	49216	0	0	0	27405	0	0	0	40745	118890	23640
sp|Q99798|ACON_HUMAN	ACO2	sp|Q99798|ACON_HUMAN Aconitate hydratase, mitochondrial OS=Homo sapiens OX=9606 GN=ACO2 PE=1 SV=2	1	6	6	6	10.9	85.424	0	12961	0	0	0	0	49425	33632	0	0	45724	78390	0
sp|Q99878|H2A1J_HUMAN;sp|Q96KK5|H2A1H_HUMAN;sp|Q9BTM1|H2AJ_HUMAN;sp|Q16777|H2A2C_HUMAN;sp|Q93077|H2A1C_HUMAN;sp|Q7L7L0|H2A3_HUMAN;sp|Q6FI13|H2A2A_HUMAN;sp|P20671|H2A1D_HUMAN;sp|P0C0S8|H2A1_HUMAN;sp|P04908|H2A1B_HUMAN;sp|Q71UI9|H2AV_HUMAN;sp|P0C0S5|H2AZ_HUMAN;sp|Q8IUE6|H2A2B_HUMAN;sp|Q96QV6|H2A1A_HUMAN;sp|P16104|H2AX_HUMAN	H2AC14	sp|Q99878|H2A1J_HUMAN Histone H2A type 1-J OS=Homo sapiens OX=9606 GN=H2AC14 PE=1 SV=3;sp|Q96KK5|H2A1H_HUMAN Histone H2A type 1-H OS=Homo sapiens OX=9606 GN=HIST1H2AH PE=1 SV=3;sp|Q9BTM1|H2AJ_HUMAN Histone H2A.J OS=Homo sapiens OX=9606 GN=H2AFJ PE=1 SV=1;s	15	2	2	2	21.9	13.936	0	189780	0	0	0	0	0	0	0	0	0	0	0
sp|Q99880|H2B1L_HUMAN;sp|Q99879|H2B1M_HUMAN;sp|Q99877|H2B1N_HUMAN;sp|Q93079|H2B1H_HUMAN;sp|Q5QNW6|H2B2F_HUMAN;sp|P62807|H2B1C_HUMAN;sp|P58876|H2B1D_HUMAN;sp|P57053|H2BFS_HUMAN;sp|O60814|H2B1K_HUMAN;sp|Q8N257|H2B3B_HUMAN;sp|Q16778|H2B2E_HUMAN;sp|P33778|H2B1B_HUMAN;sp|P23527|H2B1O_HUMAN;sp|P06899|H2B1J_HUMAN;sp|Q96A08|H2B1A_HUMAN	H2BC13	sp|Q99880|H2B1L_HUMAN Histone H2B type 1-L OS=Homo sapiens OX=9606 GN=H2BC13 PE=1 SV=3;sp|Q99879|H2B1M_HUMAN Histone H2B type 1-M OS=Homo sapiens OX=9606 GN=H2BC14 PE=1 SV=3;sp|Q99877|H2B1N_HUMAN Histone H2B type 1-N OS=Homo sapiens OX=9606 GN=H2BC15 PE=1	15	3	3	3	28.6	13.952	0	259590	61519	81398	210130	148570	0	182190	0	102400	145110	182600	161110
sp|Q99969|RARR2_HUMAN	RARRES2	sp|Q99969|RARR2_HUMAN Retinoic acid receptor responder protein 2 OS=Homo sapiens OX=9606 GN=RARRES2 PE=1 SV=1	1	4	4	4	22.1	18.617	0	511970	0	11383	0	93427	15748	13201	0	0	27236	0	0
sp|Q9BQA1|MEP50_HUMAN	WDR77	sp|Q9BQA1|MEP50_HUMAN Methylosome protein 50 OS=Homo sapiens OX=9606 GN=WDR77 PE=1 SV=1	1	2	2	2	8.8	36.724	0	0	16239	12346	0	0	0	13344	0	0	0	40364	0
sp|Q9BRF8|CPPED_HUMAN	CPPED1	sp|Q9BRF8|CPPED_HUMAN Serine/threonine-protein phosphatase CPPED1 OS=Homo sapiens OX=9606 GN=CPPED1 PE=1 SV=3	1	2	2	2	7	35.548	59012	38836	0	0	42910	33160	0	36948	0	114190	39244	59366	23837
sp|Q9BS26|ERP44_HUMAN	ERP44	sp|Q9BS26|ERP44_HUMAN Endoplasmic reticulum resident protein 44 OS=Homo sapiens OX=9606 GN=ERP44 PE=1 SV=1	1	1	1	1	3	46.971	0	0	0	0	0	0	0	0	0	0	0	5328.1	0
sp|Q9BS40|LXN_HUMAN	LXN	sp|Q9BS40|LXN_HUMAN Latexin OS=Homo sapiens OX=9606 GN=LXN PE=1 SV=2	1	3	3	3	16.7	25.75	0	155450	138540	62534	0	64695	251470	99234	0	56340	106220	267250	0
sp|Q9BT78|CSN4_HUMAN	COPS4	sp|Q9BT78|CSN4_HUMAN COP9 signalosome complex subunit 4 OS=Homo sapiens OX=9606 GN=COPS4 PE=1 SV=1	1	4	4	4	13.8	46.268	0	0	25601	0	0	0	21026	0	0	0	0	63298	0
sp|Q9BUT1|BDH2_HUMAN	BDH2	sp|Q9BUT1|BDH2_HUMAN 3-hydroxybutyrate dehydrogenase type 2 OS=Homo sapiens OX=9606 GN=BDH2 PE=1 SV=2	1	1	1	1	6.1	26.724	0	0	0	0	0	0	0	0	0	0	0	16981	0
sp|Q9BVC5|ASHWN_HUMAN	C2orf49	sp|Q9BVC5|ASHWN_HUMAN Ashwin OS=Homo sapiens OX=9606 GN=C2orf49 PE=1 SV=1	1	1	1	1	3.9	25.858	0	0	0	0	0	0	0	0	0	0	0	0	215770
sp|Q9BWD1|THIC_HUMAN	ACAT2	sp|Q9BWD1|THIC_HUMAN Acetyl-CoA acetyltransferase, cytosolic OS=Homo sapiens OX=9606 GN=ACAT2 PE=1 SV=2	1	1	1	1	5	41.35	0	11554	0	0	0	0	0	0	0	0	0	0	0
sp|Q9C0C9|UBE2O_HUMAN	UBE2O	sp|Q9C0C9|UBE2O_HUMAN (E3-independent) E2 ubiquitin-conjugating enzyme OS=Homo sapiens OX=9606 GN=UBE2O PE=1 SV=3	1	1	1	1	1.1	141.29	0	0	0	0	0	0	0	0	0	0	0	10576	0
sp|Q9GZM7|TINAL_HUMAN	TINAGL1	sp|Q9GZM7|TINAL_HUMAN Tubulointerstitial nephritis antigen-like OS=Homo sapiens OX=9606 GN=TINAGL1 PE=1 SV=1	1	1	1	1	2.1	52.387	0	5699	0	0	0	0	0	0	0	0	0	0	0
sp|Q9GZN8|CT027_HUMAN	C20orf27	sp|Q9GZN8|CT027_HUMAN UPF0687 protein C20orf27 OS=Homo sapiens OX=9606 GN=C20orf27 PE=1 SV=3	1	1	1	1	9.2	19.291	0	0	0	0	0	0	0	0	0	0	0	7618	0
sp|Q9GZP0|PDGFD_HUMAN	PDGFD	sp|Q9GZP0|PDGFD_HUMAN Platelet-derived growth factor D OS=Homo sapiens OX=9606 GN=PDGFD PE=1 SV=1	1	1	1	1	2.4	42.848	0	15387	0	0	0	0	0	0	0	0	0	0	0
sp|Q9GZP4|PITH1_HUMAN	PITHD1	sp|Q9GZP4|PITH1_HUMAN PITH domain-containing protein 1 OS=Homo sapiens OX=9606 GN=PITHD1 PE=1 SV=1	1	4	4	4	27.5	24.178	0	42272	58525	0	0	0	34216	42722	0	0	55406	105420	0
sp|Q9GZT8|NIF3L_HUMAN	NIF3L1	sp|Q9GZT8|NIF3L_HUMAN NIF3-like protein 1 OS=Homo sapiens OX=9606 GN=NIF3L1 PE=1 SV=2	1	1	1	1	2.7	41.968	0	0	0	0	0	0	0	0	0	0	0	22472	0
sp|Q9GZV4|IF5A2_HUMAN;sp|Q6IS14|IF5AL_HUMAN;sp|P63241|IF5A1_HUMAN	EIF5A2	sp|Q9GZV4|IF5A2_HUMAN Eukaryotic translation initiation factor 5A-2 OS=Homo sapiens OX=9606 GN=EIF5A2 PE=1 SV=3;sp|Q6IS14|IF5AL_HUMAN Eukaryotic translation initiation factor 5A-1-like OS=Homo sapiens OX=9606 GN=EIF5AL1 PE=2 SV=2;sp|P63241|IF5A1_HUMAN Euka	3	3	3	3	19.6	16.793	0	47212	0	0	0	0	13151	0	0	0	0	0	0
sp|Q9GZX3|CHST6_HUMAN;sp|Q9GZS9|CHST5_HUMAN;sp|Q8NCG5|CHST4_HUMAN	CHST6	sp|Q9GZX3|CHST6_HUMAN Carbohydrate sulfotransferase 6 OS=Homo sapiens OX=9606 GN=CHST6 PE=1 SV=1;sp|Q9GZS9|CHST5_HUMAN Carbohydrate sulfotransferase 5 OS=Homo sapiens OX=9606 GN=CHST5 PE=2 SV=3	3	4	4	4	11.1	44.098	0	139660	21908	0	0	0	0	0	0	0	0	0	0
sp|Q9H173|SIL1_HUMAN	SIL1	sp|Q9H173|SIL1_HUMAN Nucleotide exchange factor SIL1 OS=Homo sapiens OX=9606 GN=SIL1 PE=1 SV=1	1	1	1	1	3	52.084	0	5152.9	0	0	0	0	0	0	0	0	0	0	0
sp|Q9H299|SH3L3_HUMAN	SH3BGRL3	sp|Q9H299|SH3L3_HUMAN SH3 domain-binding glutamic acid-rich-like protein 3 OS=Homo sapiens OX=9606 GN=SH3BGRL3 PE=1 SV=1	1	3	3	3	31.2	10.438	0	137640	108000	0	0	0	126070	109380	0	0	0	137550	0
sp|Q9H2U2|IPYR2_HUMAN	PPA2	sp|Q9H2U2|IPYR2_HUMAN Inorganic pyrophosphatase 2, mitochondrial OS=Homo sapiens OX=9606 GN=PPA2 PE=1 SV=2	1	2	2	2	7.5	37.92	0	11969	0	0	0	0	0	15557	0	0	15046	33542	0
sp|Q9H313|TTYH1_HUMAN	TTYH1	sp|Q9H313|TTYH1_HUMAN Protein tweety homolog 1 OS=Homo sapiens OX=9606 GN=TTYH1 PE=1 SV=1	1	1	1	1	3.1	49.05	0	11133	0	0	0	0	0	0	0	0	0	0	0
sp|Q9H336|CRLD1_HUMAN	CRISPLD1	sp|Q9H336|CRLD1_HUMAN Cysteine-rich secretory protein LCCL domain-containing 1 OS=Homo sapiens OX=9606 GN=CRISPLD1 PE=2 SV=1	1	3	3	3	8.4	56.888	0	63743	0	0	0	0	0	0	0	0	0	0	0
sp|Q9H3G5|CPVL_HUMAN	CPVL	sp|Q9H3G5|CPVL_HUMAN Probable serine carboxypeptidase CPVL OS=Homo sapiens OX=9606 GN=CPVL PE=1 SV=2	1	6	6	6	15.1	54.163	0	58501	0	0	0	0	0	41885	0	0	0	0	0
sp|Q9H3S3|TMPS5_HUMAN	TMPRSS5	sp|Q9H3S3|TMPS5_HUMAN Transmembrane protease serine 5 OS=Homo sapiens OX=9606 GN=TMPRSS5 PE=1 SV=2	1	1	1	1	2.8	49.56	0	2285.6	0	0	0	0	0	0	0	0	0	0	0
sp|Q9H444|CHM4B_HUMAN	CHMP4B	sp|Q9H444|CHM4B_HUMAN Charged multivesicular body protein 4b OS=Homo sapiens OX=9606 GN=CHMP4B PE=1 SV=1	1	2	2	2	10.7	24.95	0	0	0	0	0	0	0	0	0	0	0	10103	0
sp|Q9H497|TOR3A_HUMAN	TOR3A	sp|Q9H497|TOR3A_HUMAN Torsin-3A OS=Homo sapiens OX=9606 GN=TOR3A PE=1 SV=1	1	1	1	1	4	46.198	0	0	0	0	0	0	0	0	0	0	13001	0	0
sp|Q9H4A4|AMPB_HUMAN	RNPEP	sp|Q9H4A4|AMPB_HUMAN Aminopeptidase B OS=Homo sapiens OX=9606 GN=RNPEP PE=1 SV=2	1	5	5	5	10.9	72.595	0	18542	0	27673	0	0	21093	0	0	0	0	59360	0
sp|Q9H4G4|GAPR1_HUMAN	GLIPR2	sp|Q9H4G4|GAPR1_HUMAN Golgi-associated plant pathogenesis-related protein 1 OS=Homo sapiens OX=9606 GN=GLIPR2 PE=1 SV=3	1	1	1	1	8.4	17.218	0	0	0	0	0	0	0	0	0	0	0	16812	0
sp|Q9H4M9|EHD1_HUMAN;sp|Q9NZN3|EHD3_HUMAN;sp|Q9H223|EHD4_HUMAN;sp|Q9NZN4|EHD2_HUMAN	EHD1	sp|Q9H4M9|EHD1_HUMAN EH domain-containing protein 1 OS=Homo sapiens OX=9606 GN=EHD1 PE=1 SV=2;sp|Q9NZN3|EHD3_HUMAN EH domain-containing protein 3 OS=Homo sapiens OX=9606 GN=EHD3 PE=1 SV=2;sp|Q9H223|EHD4_HUMAN EH domain-containing protein 4 OS=Homo sapiens	4	2	2	2	3.4	60.626	0	14768	0	0	0	0	8275.1	0	0	0	0	9709.3	0
sp|Q9H7C9|AAMDC_HUMAN	AAMDC	sp|Q9H7C9|AAMDC_HUMAN Mth938 domain-containing protein OS=Homo sapiens OX=9606 GN=AAMDC PE=1 SV=1	1	3	3	3	29.5	13.332	0	22462	0	0	0	0	27305	0	0	0	0	61169	0
sp|Q9H9H4|VP37B_HUMAN	VPS37B	sp|Q9H9H4|VP37B_HUMAN Vacuolar protein sorting-associated protein 37B OS=Homo sapiens OX=9606 GN=VPS37B PE=1 SV=1	1	2	2	2	9.8	31.307	0	25962	0	0	0	0	0	0	0	0	0	0	0
sp|Q9H9Q2|CSN7B_HUMAN	COPS7B	sp|Q9H9Q2|CSN7B_HUMAN COP9 signalosome complex subunit 7b OS=Homo sapiens OX=9606 GN=COPS7B PE=1 SV=1	1	1	1	1	4.9	29.622	0	0	0	0	0	0	0	0	0	0	0	12320	0
sp|Q9HA64|KT3K_HUMAN	FN3KRP	sp|Q9HA64|KT3K_HUMAN Ketosamine-3-kinase OS=Homo sapiens OX=9606 GN=FN3KRP PE=1 SV=2	1	1	1	1	4.2	34.412	0	0	0	0	0	0	0	0	0	0	0	16493	0
sp|Q9HAT2|SIAE_HUMAN	SIAE	sp|Q9HAT2|SIAE_HUMAN Sialate O-acetylesterase OS=Homo sapiens OX=9606 GN=SIAE PE=1 SV=1	1	3	3	3	6.9	58.314	0	30561	0	0	0	0	0	0	0	0	0	17165	0
sp|Q9HAW4|CLSPN_HUMAN	CLSPN	sp|Q9HAW4|CLSPN_HUMAN Claspin OS=Homo sapiens OX=9606 GN=CLSPN PE=1 SV=3	1	1	1	1	1.3	151.09	0	175190	0	0	0	0	0	0	0	0	0	0	0
sp|Q9HC38|GLOD4_HUMAN	GLOD4	sp|Q9HC38|GLOD4_HUMAN Glyoxalase domain-containing protein 4 OS=Homo sapiens OX=9606 GN=GLOD4 PE=1 SV=1	1	5	5	5	17.6	34.793	0	78787	71833	67921	0	0	54311	55835	0	45689	30662	106550	61146
sp|Q9HC84|MUC5B_HUMAN;sp|P98088|MUC5A_HUMAN;sp|Q02817|MUC2_HUMAN	MUC5B	sp|Q9HC84|MUC5B_HUMAN Mucin-5B OS=Homo sapiens OX=9606 GN=MUC5B PE=1 SV=3	3	64	64	64	15.4	596.33	23838	37781000	1274700	1639500	52848	3636000	1166600	121340	0	12638	1870900	312810	299130
sp|Q9HCY8|S10AE_HUMAN	S100A14	sp|Q9HCY8|S10AE_HUMAN Protein S100-A14 OS=Homo sapiens OX=9606 GN=S100A14 PE=1 SV=1	1	1	1	1	14.4	11.662	0	0	0	0	0	0	0	0	0	0	0	0	30425
sp|Q9HD20|AT131_HUMAN	ATP13A1	sp|Q9HD20|AT131_HUMAN Manganese-transporting ATPase 13A1 OS=Homo sapiens OX=9606 GN=ATP13A1 PE=1 SV=2	1	1	1	1	2.2	132.95	0	0	0	0	0	0	0	0	0	0	0	74905	0
sp|Q9NQ79|CRAC1_HUMAN	CRTAC1	sp|Q9NQ79|CRAC1_HUMAN Cartilage acidic protein 1 OS=Homo sapiens OX=9606 GN=CRTAC1 PE=1 SV=2	1	2	2	2	4.7	71.42	0	29543	0	0	0	0	0	0	0	0	0	0	0
sp|Q9NQ84|GPC5C_HUMAN	GPRC5C	sp|Q9NQ84|GPC5C_HUMAN G-protein coupled receptor family C group 5 member C OS=Homo sapiens OX=9606 GN=GPRC5C PE=1 SV=2	1	2	2	2	6.3	48.193	0	12256	0	0	0	0	0	0	0	0	0	0	0
sp|Q9NQC3|RTN4_HUMAN	RTN4	sp|Q9NQC3|RTN4_HUMAN Reticulon-4 OS=Homo sapiens OX=9606 GN=RTN4 PE=1 SV=2	1	2	2	2	2.3	129.93	0	17655	16561	52593	0	0	19269	0	0	0	0	0	0
sp|Q9NQP4|PFD4_HUMAN	PFDN4	sp|Q9NQP4|PFD4_HUMAN Prefoldin subunit 4 OS=Homo sapiens OX=9606 GN=PFDN4 PE=1 SV=1	1	1	1	1	11.2	15.314	0	0	0	0	0	0	0	0	0	0	0	8498.4	0
sp|Q9NQR4|NIT2_HUMAN	NIT2	sp|Q9NQR4|NIT2_HUMAN Omega-amidase NIT2 OS=Homo sapiens OX=9606 GN=NIT2 PE=1 SV=1	1	1	1	1	5.4	30.608	0	0	0	0	0	0	0	0	0	0	0	14810	0
sp|Q9NR45|SIAS_HUMAN	NANS	sp|Q9NR45|SIAS_HUMAN Sialic acid synthase OS=Homo sapiens OX=9606 GN=NANS PE=1 SV=2	1	3	3	3	12	40.307	0	0	0	0	0	0	7654.9	0	0	0	0	0	0
sp|Q9NRN5|OLFL3_HUMAN	OLFML3	sp|Q9NRN5|OLFL3_HUMAN Olfactomedin-like protein 3 OS=Homo sapiens OX=9606 GN=OLFML3 PE=2 SV=1	1	2	2	2	8.1	46.01	0	25957	0	0	0	0	12292	0	0	0	0	0	0
sp|Q9NRV9|HEBP1_HUMAN	HEBP1	sp|Q9NRV9|HEBP1_HUMAN Heme-binding protein 1 OS=Homo sapiens OX=9606 GN=HEBP1 PE=1 SV=1	1	4	4	4	27.5	21.097	0	59024	0	0	0	0	30658	45790	0	0	0	69479	0
sp|Q9NRX4|PHP14_HUMAN	PHPT1	sp|Q9NRX4|PHP14_HUMAN 14 kDa phosphohistidine phosphatase OS=Homo sapiens OX=9606 GN=PHPT1 PE=1 SV=1	1	3	3	3	35.2	13.832	0	64188	66217	67427	0	0	51600	64185	0	0	57001	82171	0
sp|Q9NS15|LTBP3_HUMAN	LTBP3	sp|Q9NS15|LTBP3_HUMAN Latent-transforming growth factor beta-binding protein 3 OS=Homo sapiens OX=9606 GN=LTBP3 PE=1 SV=4	1	2	2	2	2.5	139.36	0	14131	0	0	0	0	0	0	0	0	0	0	0
sp|Q9NTK5|OLA1_HUMAN	OLA1	sp|Q9NTK5|OLA1_HUMAN Obg-like ATPase 1 OS=Homo sapiens OX=9606 GN=OLA1 PE=1 SV=2	1	4	4	4	13.4	44.743	0	42224	0	0	0	0	30681	0	0	0	81977	70354	0
sp|Q9NVA2|SEP11_HUMAN	SEPTIN11	sp|Q9NVA2|SEP11_HUMAN Septin-11 OS=Homo sapiens OX=9606 GN=SEPTIN11 PE=1 SV=3	1	4	4	4	12.6	49.398	0	32448	15360	50610	0	19411	21633	0	0	0	17850	57189	29916
sp|Q9NVS9|PNPO_HUMAN	PNPO	sp|Q9NVS9|PNPO_HUMAN Pyridoxine-5-phosphate oxidase OS=Homo sapiens OX=9606 GN=PNPO PE=1 SV=1	1	3	3	3	18.4	29.988	0	14292	0	12927	0	0	0	0	0	0	0	27190	0
sp|Q9NWH9|SLTM_HUMAN	SLTM	sp|Q9NWH9|SLTM_HUMAN SAFB-like transcription modulator OS=Homo sapiens OX=9606 GN=SLTM PE=1 SV=2	1	1	1	1	1.8	117.15	0	0	0	0	0	0	0	0	0	0	0	2363.8	0
sp|Q9NXG2|THUM1_HUMAN	THUMPD1	sp|Q9NXG2|THUM1_HUMAN THUMP domain-containing protein 1 OS=Homo sapiens OX=9606 GN=THUMPD1 PE=1 SV=2	1	1	1	1	4	39.315	0	0	0	0	0	0	0	0	0	0	0	8004.3	0
sp|Q9NY33|DPP3_HUMAN	DPP3	sp|Q9NY33|DPP3_HUMAN Dipeptidyl peptidase 3 OS=Homo sapiens OX=9606 GN=DPP3 PE=1 SV=2	1	4	4	4	8.5	82.588	0	40698	49335	34061	0	0	42648	28436	0	0	53932	83142	0
sp|Q9NZD4|AHSP_HUMAN	AHSP	sp|Q9NZD4|AHSP_HUMAN Alpha-hemoglobin-stabilizing protein OS=Homo sapiens OX=9606 GN=AHSP PE=1 SV=1	1	3	3	3	34.3	11.84	0	142570	98685	83661	0	0	95999	139190	0	158410	119820	349600	0
sp|Q9NZH0|GPC5B_HUMAN	GPRC5B	sp|Q9NZH0|GPC5B_HUMAN G-protein coupled receptor family C group 5 member B OS=Homo sapiens OX=9606 GN=GPRC5B PE=2 SV=2	1	2	2	2	6	44.794	0	29159	0	0	0	0	0	0	0	0	0	0	0
sp|Q9NZJ9|NUDT4_HUMAN;sp|A0A024RBG1|NUD4B_HUMAN	NUDT4	sp|Q9NZJ9|NUDT4_HUMAN Diphosphoinositol polyphosphate phosphohydrolase 2 OS=Homo sapiens OX=9606 GN=NUDT4 PE=1 SV=2;sp|A0A024RBG1|NUD4B_HUMAN Diphosphoinositol polyphosphate phosphohydrolase NUDT4B OS=Homo sapiens OX=9606 GN=NUDT4B PE=3 SV=1	2	2	2	2	13.3	20.306	0	0	0	0	0	0	0	0	0	0	0	30180	0
sp|Q9NZP8|C1RL_HUMAN	C1RL	sp|Q9NZP8|C1RL_HUMAN Complement C1r subcomponent-like protein OS=Homo sapiens OX=9606 GN=C1RL PE=1 SV=2	1	2	2	2	4.5	53.498	0	49747	0	55658	0	0	64447	52613	0	0	41608	26868	48011
sp|Q9NZT1|CALL5_HUMAN	CALML5	sp|Q9NZT1|CALL5_HUMAN Calmodulin-like protein 5 OS=Homo sapiens OX=9606 GN=CALML5 PE=1 SV=2	1	6	6	6	39	15.892	0	0	59849	225300	422780	268160	0	1505800	0	444840	212630	100040	502320
sp|Q9P2E9|RRBP1_HUMAN	RRBP1	sp|Q9P2E9|RRBP1_HUMAN Ribosome-binding protein 1 OS=Homo sapiens OX=9606 GN=RRBP1 PE=1 SV=5	1	3	3	3	2.3	152.45	0	0	0	0	0	0	0	0	0	0	0	17222	0
sp|Q9P2T1|GMPR2_HUMAN	GMPR2	sp|Q9P2T1|GMPR2_HUMAN GMP reductase 2 OS=Homo sapiens OX=9606 GN=GMPR2 PE=1 SV=1	1	1	1	1	4.9	37.874	0	0	0	0	0	0	0	0	0	0	0	8042.4	0
sp|Q9UBG0|MRC2_HUMAN	MRC2	sp|Q9UBG0|MRC2_HUMAN C-type mannose receptor 2 OS=Homo sapiens OX=9606 GN=MRC2 PE=1 SV=2	1	1	1	1	0.9	166.67	0	0	0	0	0	0	0	0	0	0	0	4568.5	0
sp|Q9UBP4|DKK3_HUMAN	DKK3	sp|Q9UBP4|DKK3_HUMAN Dickkopf-related protein 3 OS=Homo sapiens OX=9606 GN=DKK3 PE=1 SV=2	1	7	7	7	27.4	38.39	0	61376	187830	160950	0	0	100150	54668	347280	0	283820	80645	69804
sp|Q9UBQ0|VPS29_HUMAN	VPS29	sp|Q9UBQ0|VPS29_HUMAN Vacuolar protein sorting-associated protein 29 OS=Homo sapiens OX=9606 GN=VPS29 PE=1 SV=1	1	2	2	2	12.6	20.505	0	0	0	0	0	0	8874.1	0	0	0	0	19384	0
sp|Q9UBQ7|GRHPR_HUMAN	GRHPR	sp|Q9UBQ7|GRHPR_HUMAN Glyoxylate reductase/hydroxypyruvate reductase OS=Homo sapiens OX=9606 GN=GRHPR PE=1 SV=1	1	4	4	4	19.5	35.668	0	20437	0	0	0	0	0	0	0	0	0	61867	0
sp|Q9UBX7|KLK11_HUMAN	KLK11	sp|Q9UBX7|KLK11_HUMAN Kallikrein-11 OS=Homo sapiens OX=9606 GN=KLK11 PE=1 SV=2	1	3	3	3	11.7	31.059	0	160950	13242	16630	0	0	0	0	0	0	5800.8	8319.8	0
sp|Q9UEW3|MARCO_HUMAN	MARCO	sp|Q9UEW3|MARCO_HUMAN Macrophage receptor MARCO OS=Homo sapiens OX=9606 GN=MARCO PE=1 SV=1	1	1	1	1	3.1	52.657	0	15424	0	0	0	0	0	0	0	0	0	0	0
sp|Q9UGM3|DMBT1_HUMAN	DMBT1	sp|Q9UGM3|DMBT1_HUMAN Deleted in malignant brain tumors 1 protein OS=Homo sapiens OX=9606 GN=DMBT1 PE=1 SV=2	1	1	1	1	7	260.73	0	0	0	0	0	0	0	0	0	0	0	0	0
sp|Q9UGM5|FETUB_HUMAN	FETUB	sp|Q9UGM5|FETUB_HUMAN Fetuin-B OS=Homo sapiens OX=9606 GN=FETUB PE=1 SV=2	1	4	4	4	13.4	42.054	0	60515	0	56362	0	0	136470	63262	0	0	74494	53053	0
sp|Q9UHG3|PCYOX_HUMAN	PCYOX1	sp|Q9UHG3|PCYOX_HUMAN Prenylcysteine oxidase 1 OS=Homo sapiens OX=9606 GN=PCYOX1 PE=1 SV=3	1	1	1	1	2.6	56.639	0	0	0	0	0	0	0	0	0	0	0	7942	0
sp|Q9UHL4|DPP2_HUMAN	DPP7	sp|Q9UHL4|DPP2_HUMAN Dipeptidyl peptidase 2 OS=Homo sapiens OX=9606 GN=DPP7 PE=1 SV=3	1	2	2	2	6.1	54.341	0	48921	0	0	0	0	9163.1	0	0	0	0	25181	0
sp|Q9UJU6|DBNL_HUMAN	DBNL	sp|Q9UJU6|DBNL_HUMAN Drebrin-like protein OS=Homo sapiens OX=9606 GN=DBNL PE=1 SV=1	1	2	2	2	6.3	48.207	0	15258	7989.3	13049	0	0	15823	0	0	0	0	11697	0
sp|Q9UK22|FBX2_HUMAN	FBXO2	sp|Q9UK22|FBX2_HUMAN F-box only protein 2 OS=Homo sapiens OX=9606 GN=FBXO2 PE=1 SV=2	1	1	1	1	5.1	33.327	0	0	0	0	0	0	0	0	0	0	0	14104	0
sp|Q9UK41|VPS28_HUMAN	VPS28	sp|Q9UK41|VPS28_HUMAN Vacuolar protein sorting-associated protein 28 homolog OS=Homo sapiens OX=9606 GN=VPS28 PE=1 SV=1	1	1	1	1	6.8	25.425	0	12598	0	0	0	0	0	0	0	0	0	0	0
sp|Q9UKK9|NUDT5_HUMAN	NUDT5	sp|Q9UKK9|NUDT5_HUMAN ADP-sugar pyrophosphatase OS=Homo sapiens OX=9606 GN=NUDT5 PE=1 SV=1	1	2	2	2	11	24.327	0	0	17106	0	0	0	12152	0	0	0	0	33522	0
sp|Q9UKL3|C8AP2_HUMAN	CASP8AP2	sp|Q9UKL3|C8AP2_HUMAN CASP8-associated protein 2 OS=Homo sapiens OX=9606 GN=CASP8AP2 PE=1 SV=1	1	1	1	1	0.5	222.66	0	0	0	0	0	0	0	0	0	0	1129.3	0	0
sp|Q9UL25|RAB21_HUMAN	RAB21	sp|Q9UL25|RAB21_HUMAN Ras-related protein Rab-21 OS=Homo sapiens OX=9606 GN=RAB21 PE=1 SV=3	1	1	1	1	6.7	24.347	0	0	0	0	0	0	0	0	0	0	0	4591	0
sp|Q9UL46|PSME2_HUMAN	PSME2	sp|Q9UL46|PSME2_HUMAN Proteasome activator complex subunit 2 OS=Homo sapiens OX=9606 GN=PSME2 PE=1 SV=4	1	3	3	3	13	27.401	0	36105	36685	39990	0	0	38493	30317	0	38642	49706	82089	43401
sp|Q9ULA0|DNPEP_HUMAN	DNPEP	sp|Q9ULA0|DNPEP_HUMAN Aspartyl aminopeptidase OS=Homo sapiens OX=9606 GN=DNPEP PE=1 SV=1	1	1	1	1	3.4	52.428	0	0	0	0	0	0	0	0	0	0	0	14268	0
sp|Q9UN36|NDRG2_HUMAN	NDRG2	sp|Q9UN36|NDRG2_HUMAN Protein NDRG2 OS=Homo sapiens OX=9606 GN=NDRG2 PE=1 SV=2	1	3	3	3	11.9	40.798	0	25060	0	0	0	0	0	23098	0	0	0	79466	0
sp|Q9UNM6|PSD13_HUMAN	PSMD13	sp|Q9UNM6|PSD13_HUMAN 26S proteasome non-ATPase regulatory subunit 13 OS=Homo sapiens OX=9606 GN=PSMD13 PE=1 SV=2	1	2	2	2	5.1	42.945	0	14244	0	17088	0	0	0	6387.4	0	0	0	38106	0
sp|Q9UNW1|MINP1_HUMAN	MINPP1	sp|Q9UNW1|MINP1_HUMAN Multiple inositol polyphosphate phosphatase 1 OS=Homo sapiens OX=9606 GN=MINPP1 PE=1 SV=1	1	1	1	1	3.3	55.051	0	0	0	0	0	0	0	0	0	0	0	0	5895.2
sp|Q9UNZ2|NSF1C_HUMAN	NSFL1C	sp|Q9UNZ2|NSF1C_HUMAN NSFL1 cofactor p47 OS=Homo sapiens OX=9606 GN=NSFL1C PE=1 SV=2	1	7	7	7	26.2	40.572	0	66146	52353	30321	74393	0	43125	52197	0	0	87992	131500	73386
sp|Q9UQ80|PA2G4_HUMAN	PA2G4	sp|Q9UQ80|PA2G4_HUMAN Proliferation-associated protein 2G4 OS=Homo sapiens OX=9606 GN=PA2G4 PE=1 SV=3	1	4	4	4	16.2	43.786	0	35141	0	0	0	0	0	0	0	0	0	54603	0
sp|Q9Y230|RUVB2_HUMAN	RUVBL2	sp|Q9Y230|RUVB2_HUMAN RuvB-like 2 OS=Homo sapiens OX=9606 GN=RUVBL2 PE=1 SV=3	1	2	2	2	4.3	51.156	0	0	0	0	0	0	0	0	0	0	0	30422	0
sp|Q9Y240|CLC11_HUMAN	CLEC11A	sp|Q9Y240|CLC11_HUMAN C-type lectin domain family 11 member A OS=Homo sapiens OX=9606 GN=CLEC11A PE=1 SV=1	1	3	3	3	11.5	35.694	0	55618	0	0	0	0	0	0	0	0	0	0	0
sp|Q9Y243|AKT3_HUMAN;sp|P31749|AKT1_HUMAN	AKT3	sp|Q9Y243|AKT3_HUMAN RAC-gamma serine/threonine-protein kinase OS=Homo sapiens OX=9606 GN=AKT3 PE=1 SV=1;sp|P31749|AKT1_HUMAN RAC-alpha serine/threonine-protein kinase OS=Homo sapiens OX=9606 GN=AKT1 PE=1 SV=2	2	1	1	1	3.3	55.774	0	2499700	1813900	0	0	0	0	0	0	0	0	0	0
sp|Q9Y2B0|CNPY2_HUMAN	CNPY2	sp|Q9Y2B0|CNPY2_HUMAN Protein canopy homolog 2 OS=Homo sapiens OX=9606 GN=CNPY2 PE=1 SV=1	1	2	2	2	14.3	20.652	0	0	0	0	0	0	0	0	0	0	0	13410	0
sp|Q9Y2V2|CHSP1_HUMAN	CARHSP1	sp|Q9Y2V2|CHSP1_HUMAN Calcium-regulated heat-stable protein 1 OS=Homo sapiens OX=9606 GN=CARHSP1 PE=1 SV=2	1	1	1	1	10.9	15.892	0	30321	0	0	0	0	0	0	0	0	0	14059	0
sp|Q9Y315|DEOC_HUMAN	DERA	sp|Q9Y315|DEOC_HUMAN Deoxyribose-phosphate aldolase OS=Homo sapiens OX=9606 GN=DERA PE=1 SV=2	1	1	1	1	5	35.23	0	0	0	0	0	0	0	0	0	0	0	3244	0
sp|Q9Y337|KLK5_HUMAN	KLK5	sp|Q9Y337|KLK5_HUMAN Kallikrein-5 OS=Homo sapiens OX=9606 GN=KLK5 PE=1 SV=3	1	1	1	1	4.1	32.02	0	18523	0	0	0	0	0	0	0	0	0	0	0
sp|Q9Y3C6|PPIL1_HUMAN	PPIL1	sp|Q9Y3C6|PPIL1_HUMAN Peptidyl-prolyl cis-trans isomerase-like 1 OS=Homo sapiens OX=9606 GN=PPIL1 PE=1 SV=1	1	2	2	2	15.1	18.237	0	0	0	0	0	0	0	0	0	0	0	13135	0
sp|Q9Y3P9|RBGP1_HUMAN	RABGAP1	sp|Q9Y3P9|RBGP1_HUMAN Rab GTPase-activating protein 1 OS=Homo sapiens OX=9606 GN=RABGAP1 PE=1 SV=3	1	1	1	1	0.8	121.74	0	0	0	0	0	0	497520	0	0	0	0	0	0
sp|Q9Y3R5|DOP2_HUMAN	DOP1B	sp|Q9Y3R5|DOP2_HUMAN Protein dopey-2 OS=Homo sapiens OX=9606 GN=DOP1B PE=1 SV=5	1	1	1	1	0.3	258.23	0	0	0	0	0	0	0	0	0	0	0	20698000	0
sp|Q9Y490|TLN1_HUMAN	TLN1	sp|Q9Y490|TLN1_HUMAN Talin-1 OS=Homo sapiens OX=9606 GN=TLN1 PE=1 SV=3	1	18	18	18	10.2	269.76	0	74767	105310	104000	0	79136	136950	121780	0	21486	88503	302450	51559
sp|Q9Y4E8|UBP15_HUMAN	USP15	sp|Q9Y4E8|UBP15_HUMAN Ubiquitin carboxyl-terminal hydrolase 15 OS=Homo sapiens OX=9606 GN=USP15 PE=1 SV=3	1	2	2	2	2.1	112.42	0	0	21661	0	0	0	0	0	0	0	0	0	0
sp|Q9Y5W5|WIF1_HUMAN	WIF1	sp|Q9Y5W5|WIF1_HUMAN Wnt inhibitory factor 1 OS=Homo sapiens OX=9606 GN=WIF1 PE=1 SV=3	1	8	8	8	27.2	41.527	0	511070	56463	96892	0	134740	0	0	0	0	73558	17454	0
sp|Q9Y5Y6|ST14_HUMAN	ST14	sp|Q9Y5Y6|ST14_HUMAN Suppressor of tumorigenicity 14 protein OS=Homo sapiens OX=9606 GN=ST14 PE=1 SV=2	1	1	1	1	1.9	94.769	0	5192.9	0	0	0	0	0	0	0	0	0	0	0
sp|Q9Y5Z4|HEBP2_HUMAN	HEBP2	sp|Q9Y5Z4|HEBP2_HUMAN Heme-binding protein 2 OS=Homo sapiens OX=9606 GN=HEBP2 PE=1 SV=1	1	2	2	2	10.7	22.875	0	0	0	0	0	0	9654.6	29232	0	0	0	70608	47104
sp|Q9Y646|CBPQ_HUMAN	CPQ	sp|Q9Y646|CBPQ_HUMAN Carboxypeptidase Q OS=Homo sapiens OX=9606 GN=CPQ PE=1 SV=1	1	2	2	2	4.2	51.887	0	30070	0	26302	0	0	0	0	0	0	0	19745	0
sp|Q9Y696|CLIC4_HUMAN	CLIC4	sp|Q9Y696|CLIC4_HUMAN Chloride intracellular channel protein 4 OS=Homo sapiens OX=9606 GN=CLIC4 PE=1 SV=4	1	4	4	4	19.4	28.772	0	0	27144	25316	0	0	47648	22335	0	44155	0	217410	0
sp|Q9Y6I3|EPN1_HUMAN	EPN1	sp|Q9Y6I3|EPN1_HUMAN Epsin-1 OS=Homo sapiens OX=9606 GN=EPN1 PE=1 SV=2	1	1	1	1	1.9	60.293	0	0	0	0	0	0	0	0	0	0	0	32927	0
sp|Q9Y6R7|FCGBP_HUMAN	FCGBP	sp|Q9Y6R7|FCGBP_HUMAN IgGFc-binding protein OS=Homo sapiens OX=9606 GN=FCGBP PE=1 SV=3	1	33	33	33	13	572.01	0	457130	86930	361200	66440	0	1314700	64365	851900	23053	112280	48111	92710
sp|Q9Y6X9|MORC2_HUMAN	MORC2	sp|Q9Y6X9|MORC2_HUMAN ATPase MORC2 OS=Homo sapiens OX=9606 GN=MORC2 PE=1 SV=2	1	1	1	1	1.8	117.82	0	0	0	0	0	0	0	0	0	0	0	0	783220
Protein groups(1,068) identified when it was not considered in how many samples the protein was detected.

## Sheet: Differential Proteins
Table S2. Differential proteins
Protein IDs	Gene Name	Fasta headers	Number of proteins	Peptides	Razor + unique peptides	Unique peptides	Sequence coverage [%]	Mol. weight [kDa]	LFQ intensity A1	LFQ intensity A3	LFQ intensity A4	LFQ intensity A5	LFQ intensity A6	LFQ intensity A7	LFQ intensity A9	LFQ intensity A10	LFQ intensity N1	LFQ intensity N2	LFQ intensity N3	LFQ intensity N4	LFQ intensity N6	Average A	Average N	A/N	P value
sp|A0A075B6K5|LV39_HUMAN;sp|A0A075B6K2|LV312_HUMAN	IGLV3-9	sp|A0A075B6K5|LV39_HUMAN Immunoglobulin lambda variable 3-9 OS=Homo sapiens OX=9606 GN=IGLV3-9 PE=3 SV=1	2	3	3	1	30.4	12.332	578810	775690	486750	205090		1371400	196520	626110	172450	211690	216790	153290	159420	605767	182728	3.31513	0.0420886
sp|P01700|LV147_HUMAN;sp|P01699|LV144_HUMAN	IGLV1-47	sp|P01700|LV147_HUMAN Immunoglobulin lambda variable 1-47 OS=Homo sapiens OX=9606 GN=IGLV1-47 PE=1 SV=2;sp|P01699|LV144_HUMAN Immunoglobulin lambda variable 1-44 OS=Homo sapiens OX=9606 GN=IGLV1-44 PE=1 SV=2	2	3	3	3	24.8	12.283		734800	595060	183760		489920	884830	621520	160990	406600	334320	209490	184820	584982	259244	2.25649	0.0202343
sp|P62826|RAN_HUMAN	RAN	sp|P62826|RAN_HUMAN GTP-binding nuclear protein Ran OS=Homo sapiens OX=9606 GN=RAN PE=1 SV=3	1	8	8	8	44.4	24.423	241330	281820	164660	118090	131340	115910	233390	359010		596770	471400	610300	173010	205694	462870	0.444388	0.0103785
sp|P00491|PNPH_HUMAN	PNP	sp|P00491|PNPH_HUMAN Purine nucleoside phosphorylase OS=Homo sapiens OX=9606 GN=PNP PE=1 SV=2	1	10	10	10	43.9	32.118	159170	295380	394260	129630	150420	193900	225120	266270		920710	373150	625110	188770	226769	526935	0.430354	0.0269112
sp|P62328|TYB4_HUMAN	TMSB4X	sp|P62328|TYB4_HUMAN Thymosin beta-4 OS=Homo sapiens OX=9606 GN=TMSB4X PE=1 SV=2	1	2	2	2	31.8	5.0526	711970	1101600	556500		523810	276240	951340	742720		1314080	1912600	2233000	1050280	694883	1627490	0.426966	0.00384256
sp|P05091|ALDH2_HUMAN	ALDH2	sp|P05091|ALDH2_HUMAN Aldehyde dehydrogenase, mitochondrial OS=Homo sapiens OX=9606 GN=ALDH2 PE=1 SV=2	1	6	5	5	13.3	56.381		50967	35293	90389		81287	20079	18233		221810	228620	155890	144343	49374.7	187666	0.263099	0.000351657
sp|Q9HC84|MUC5B_HUMAN;sp|P98088|MUC5A_HUMAN;sp|Q02817|MUC2_HUMAN	MUC5B	sp|Q9HC84|MUC5B_HUMAN Mucin-5B OS=Homo sapiens OX=9606 GN=MUC5B PE=1 SV=3	3	64	64	64	15.4	596.33	23838	37781000	1274700	1639500	52848	3636000	1166600	121340		12638	1870900	312810	299130	5.71198e+06	623870	9.15573	0.463372
sp|P31947|1433S_HUMAN	SFN	sp|P31947|1433S_HUMAN 14-3-3 protein sigma OS=Homo sapiens OX=9606 GN=SFN PE=1 SV=1	1	6	4	4	25	27.774			49007	10455		44192		783850			11071	37665	37353	221876	28696.3	7.73186	0.424002
sp|O00391|QSOX1_HUMAN	QSOX1	sp|O00391|QSOX1_HUMAN Sulfhydryl oxidase 1 OS=Homo sapiens OX=9606 GN=QSOX1 PE=1 SV=3	1	18	18	18	26.6	82.577		2245200	142470	216200	93061	578260	30806	13093			110280	42498	40180	474156	64319.3	7.3719	0.418655
sp|P47929|LEG7_HUMAN	LGALS7	sp|P47929|LEG7_HUMAN Galectin-7 OS=Homo sapiens OX=9606 GN=LGALS7 PE=1 SV=2	1	4	4	4	33.1	15.075			23008	26978	111120	39810	10704	1290100		43682		24331	49853	250287	39288.7	6.37045	0.511634
sp|P02788|TRFL_HUMAN	LTF	sp|P02788|TRFL_HUMAN Lactotransferrin OS=Homo sapiens OX=9606 GN=LTF PE=1 SV=6	1	50	50	48	69.3	78.181	534980	86548000	879810	627550	318370	8355700	4240300	140690		559630	6965400	789090	125370	12705675	2.10987e+06	6.02201	0.506937
sp|P36222|CH3L1_HUMAN	CHI3L1	sp|P36222|CH3L1_HUMAN Chitinase-3-like protein 1 OS=Homo sapiens OX=9606 GN=CHI3L1 PE=1 SV=2	1	13	13	13	43.9	42.625	271490	3822400	61310	27174		477850	101380	104040		15406	504740	22185		695092	180777	3.84502	0.555052
sp|P02144|MYG_HUMAN	MB	sp|P02144|MYG_HUMAN Myoglobin OS=Homo sapiens OX=9606 GN=MB PE=1 SV=2	1	4	4	4	39.6	17.184			405370	524400		38833	1249200	61665		18801	342150	18260		455894	126404	3.60665	0.319213
sp|Q15113|PCOC1_HUMAN	PCOLCE	sp|Q15113|PCOC1_HUMAN Procollagen C-endopeptidase enhancer 1 OS=Homo sapiens OX=9606 GN=PCOLCE PE=1 SV=2	1	7	7	7	21.2	47.972		496850	135670	205770		216420	232030	97070	48114		78899	88114	60867	230635	68998.5	3.34261	0.054983
sp|Q14508|WFDC2_HUMAN	WFDC2	sp|Q14508|WFDC2_HUMAN WAP four-disulfide core domain protein 2 OS=Homo sapiens OX=9606 GN=WFDC2 PE=1 SV=2	1	5	5	5	67.7	12.993	139730	4448800	218160	584760	207500	739410	218600	581730			433230	124140	265100	892336	274157	3.25484	0.495247
sp|P07360|CO8G_HUMAN	C8G	sp|P07360|CO8G_HUMAN Complement component C8 gamma chain OS=Homo sapiens OX=9606 GN=C8G PE=1 SV=3	1	8	8	8	54.5	22.277		859240	207040	50885		45435	162330	58881	19181	36187	77332	187290	35996	230635	71197.2	3.23939	0.29966
sp|P09486|SPRC_HUMAN	SPARC	sp|P09486|SPRC_HUMAN SPARC OS=Homo sapiens OX=9606 GN=SPARC PE=1 SV=1	1	9	9	9	35.3	34.632	68406	1804400	111290	238930	56082	356610	61280	108480			197510	96839	44833	350685	113061	3.10174	0.522465
sp|P13671|CO6_HUMAN	C6	sp|P13671|CO6_HUMAN Complement component C6 OS=Homo sapiens OX=9606 GN=C6 PE=1 SV=3	1	21	21	21	27.8	104.79		2142100	185120	141070	64734	305910	512560	407090		97030	268980	231670	133710	536941	182848	2.93655	0.36604
sp|P00736|C1R_HUMAN	C1R	sp|P00736|C1R_HUMAN Complement C1r subcomponent OS=Homo sapiens OX=9606 GN=C1R PE=1 SV=2	1	12	12	12	24.5	80.118	245180	2613200	631780	366300	117530	758990	375030	408670	45002	206220	657190	141460	126030	689585	235180	2.93215	0.25061
sp|Q15848|ADIPO_HUMAN	ADIPOQ	sp|Q15848|ADIPO_HUMAN Adiponectin OS=Homo sapiens OX=9606 GN=ADIPOQ PE=1 SV=1	1	2	2	2	12.3	26.413		15519	100280	97552			113090	52164		13403	31423	32731		75721	25852.3	2.92898	0.0904907
sp|P01833|PIGR_HUMAN	PIGR	sp|P01833|PIGR_HUMAN Polymeric immunoglobulin receptor OS=Homo sapiens OX=9606 GN=PIGR PE=1 SV=4	1	18	18	18	29.2	83.283		4127700	285140	372140	38664	182780	1267400	56843		17097	913140	64466	241790	904381	309123	2.92563	0.461036
sp|P80188|NGAL_HUMAN	LCN2	sp|P80188|NGAL_HUMAN Neutrophil gelatinase-associated lipocalin OS=Homo sapiens OX=9606 GN=LCN2 PE=1 SV=2	1	8	8	8	46.5	22.588	149540	6251800	254190	136330		198960	320610	85630		186890	805470	101530		1.05672e+06	364630	2.89807	0.628588
sp|Q08380|LG3BP_HUMAN	LGALS3BP	sp|Q08380|LG3BP_HUMAN Galectin-3-binding protein OS=Homo sapiens OX=9606 GN=LGALS3BP PE=1 SV=1	1	14	14	14	30.9	65.33	72481	4670700	384620	693690	198720	1049000	449420	295950	101190	37051	1133000	268130	146010	976823	337076	2.89793	0.386923
sp|P49788|TIG1_HUMAN	RARRES1	sp|P49788|TIG1_HUMAN Retinoic acid receptor responder protein 1 OS=Homo sapiens OX=9606 GN=RARRES1 PE=1 SV=2	1	11	11	11	33.7	33.285	2497000	11206000	1226800	1081200	885470	4784900	385780	245040			2264800	209360	540340	2.78902e+06	1.00483e+06	2.77561	0.446349
sp|P09871|C1S_HUMAN	C1S	sp|P09871|C1S_HUMAN Complement C1s subcomponent OS=Homo sapiens OX=9606 GN=C1S PE=1 SV=1	1	13	13	12	26	76.684	251820	1950500	731090	490200	258860	922360	719340	447610	243200	134890	646260	201750	140850	721472	273390	2.63899	0.113322
sp|P06681|CO2_HUMAN	C2	sp|P06681|CO2_HUMAN Complement C2 OS=Homo sapiens OX=9606 GN=C2 PE=1 SV=2	1	14	14	14	22.1	83.267		418520	385710	85343		74403	397190	179640	78530	44029	161980	121330	87941	256801	98762	2.6002	0.0652089
sp|P07858|CATB_HUMAN	CTSB	sp|P07858|CATB_HUMAN Cathepsin B OS=Homo sapiens OX=9606 GN=CTSB PE=1 SV=3	1	6	6	6	24.5	37.821		260610	69317	96043	53356		80695	74135		30516	46862	46447	47109	105693	42733.5	2.4733	0.149731
sp|P02452|CO1A1_HUMAN;CON__Q862S4	COL1A1	sp|P02452|CO1A1_HUMAN Collagen alpha-1(I) chain OS=Homo sapiens OX=9606 GN=COL1A1 PE=1 SV=5	2	13	13	13	12.4	138.94		423350	2805400	4506400		3015100	4419000	1692700	949050	366870	685460	531770	3201400	2810325	1146910	2.45034	0.0833463
sp|P10643|CO7_HUMAN;CON__Q29RQ1	C7	sp|P10643|CO7_HUMAN Complement component C7 OS=Homo sapiens OX=9606 GN=C7 PE=1 SV=2	2	31	31	31	45.4	93.517	453280	7112500	895790	513710	253680	1915100	1141100	610770	1287700	359960	1020700	539760	247530	1.61199e+06	691130	2.3324	0.398966
sp|P01011|AACT_HUMAN	SERPINA3	sp|P01011|AACT_HUMAN Alpha-1-antichymotrypsin OS=Homo sapiens OX=9606 GN=SERPINA3 PE=1 SV=2	1	14	14	14	32.4	47.65	4420900	57192000	8426000	5183600	1549500	7083400	9071900	10376000	8732200	2778300	7820400	3336200	5421700	1.29129e+07	5617760	2.29859	0.397556
sp|Q05707|COEA1_HUMAN	COL14A1	sp|Q05707|COEA1_HUMAN Collagen alpha-1(XIV) chain OS=Homo sapiens OX=9606 GN=COL14A1 PE=1 SV=3	1	7	7	7	4.7	193.51		32058	26159	179690			58783				29193	23560	49011	74172.5	33921.3	2.1866	0.391634
sp|A0A0C4DH38|HV551_HUMAN;sp|A0A0J9YXX1|HV5X1_HUMAN	IGHV5-51	sp|A0A0C4DH38|HV551_HUMAN Immunoglobulin heavy variable 5-51 OS=Homo sapiens OX=9606 GN=IGHV5-51 PE=3 SV=1;sp|A0A0J9YXX1|HV5X1_HUMAN Immunoglobulin heavy variable 5-10-1 OS=Homo sapiens OX=9606 GN=IGHV5-10-1 PE=3 SV=1	2	3	3	3	33.3	12.674		105470	70155	29268			259920	35974		34300	40085	65349		100157	46578	2.15032	0.381005
sp|Q06828|FMOD_HUMAN	FMOD	sp|Q06828|FMOD_HUMAN Fibromodulin OS=Homo sapiens OX=9606 GN=FMOD PE=1 SV=2	1	6	6	6	21.8	43.178	57565	1779500	198620	344160		453920	214090	40378			306430	60822	265790	441176	211014	2.09074	0.547242
sp|P07358|CO8B_HUMAN	C8B	sp|P07358|CO8B_HUMAN Complement component C8 beta chain OS=Homo sapiens OX=9606 GN=C8B PE=1 SV=3	1	11	11	11	24.5	67.046	61222	824010	339580	205480		231480	372590	232760	70396	139690	227530	227080	149020	323875	162743	1.9901	0.183135
sp|P0C0L5|CO4B_HUMAN	C4B	sp|P0C0L5|CO4B_HUMAN Complement C4-B OS=Homo sapiens OX=9606 GN=C4B PE=1 SV=2	1	59	59	3	36.4	192.75	4306300	36404000	16836000	3229500	1519800	8123300	14598000	10115000	2786500	5464600	15355000	3525500	3197900	1.18915e+07	6065900	1.96038	0.307291
sp|P02656|APOC3_HUMAN	APOC3	sp|P02656|APOC3_HUMAN Apolipoprotein C-III OS=Homo sapiens OX=9606 GN=APOC3 PE=1 SV=1	1	2	2	2	27.3	10.852		229110	356370	96778			181900	1005900	188270	163010	162180	70072	379390	374012	192584	1.94207	0.320166
sp|Q03252|LMNB2_HUMAN	LMNB2	sp|Q03252|LMNB2_HUMAN Lamin-B2 OS=Homo sapiens OX=9606 GN=LMNB2 PE=1 SV=4	1	3	3	3	6.1	69.948		11148	17745				30607	63319			11775	13088	23570	30704.8	16144.3	1.90189	0.348279
sp|P04114|APOB_HUMAN;CON__ENSEMBL:ENSBTAP00000032840	APOB	sp|P04114|APOB_HUMAN Apolipoprotein B-100 OS=Homo sapiens OX=9606 GN=APOB PE=1 SV=2	2	126	126	126	31.7	515.6	2055300	5246100	12042000	3951700	189690	2797500	10464000	7771700	310040	2154900	7984300	1952600	2374500	5.56475e+06	2955268	1.88299	0.25058
sp|P27169|PON1_HUMAN	PON1	sp|P27169|PON1_HUMAN Serum paraoxonase/arylesterase 1 OS=Homo sapiens OX=9606 GN=PON1 PE=1 SV=3	1	6	6	6	19.4	39.731		342660	1008400	510620	88947	210350	981160	724980	215750	109780	409130	605160	135670	552445	295098	1.87207	0.189433
sp|P01780|HV307_HUMAN;sp|P01763|HV348_HUMAN;sp|P01762|HV311_HUMAN;sp|A0A0B4J1V1|HV321_HUMAN;sp|A0A0C4DH32|HV320_HUMAN;sp|A0A0J9YVY3|HV741_HUMAN	IGHV3-7	sp|P01780|HV307_HUMAN Immunoglobulin heavy variable 3-7 OS=Homo sapiens OX=9606 GN=IGHV3-7 PE=1 SV=2;sp|P01763|HV348_HUMAN Immunoglobulin heavy variable 3-48 OS=Homo sapiens OX=9606 GN=IGHV3-48 PE=1 SV=2;sp|P01762|HV311_HUMAN Immunoglobulin heavy variable	6	3	2	1	26.5	12.943		538710	459480	171960		253150	834290	317070		197430	253830	242300		429110	231187	1.85612	0.210431
sp|P05543|THBG_HUMAN;CON__Q9TT36	SERPINA7	sp|P05543|THBG_HUMAN Thyroxine-binding globulin OS=Homo sapiens OX=9606 GN=SERPINA7 PE=1 SV=2	2	7	7	7	21	46.324	364940	286870	208900	467290		149270	462550	355750	237390	121220	201830	118870	204110	327939	176684	1.85607	0.0266355
sp|P02747|C1QC_HUMAN	C1QC	sp|P02747|C1QC_HUMAN Complement C1q subcomponent subunit C OS=Homo sapiens OX=9606 GN=C1QC PE=1 SV=3	1	5	5	5	25.3	25.773	166220	129230	316930	269340		384680	231190	461430		66852	285080	127650	130340	279860	152480	1.83538	0.0984391
sp|P05546|HEP2_HUMAN	SERPIND1	sp|P05546|HEP2_HUMAN Heparin cofactor 2 OS=Homo sapiens OX=9606 GN=SERPIND1 PE=1 SV=3	1	7	7	7	16.2	57.07		448740	440860	281520		148600	593840	492690	174900	76866	379800	280500	182050	401042	218823	1.83272	0.0625938
sp|O14791|APOL1_HUMAN	APOL1	sp|O14791|APOL1_HUMAN Apolipoprotein L1 OS=Homo sapiens OX=9606 GN=APOL1 PE=1 SV=5	1	8	8	8	23.9	43.974		152730	405760	178300		47544	470580	152640		39625	237480	155280	83133	234592	128880	1.82025	0.279014
sp|P04196|HRG_HUMAN	HRG	sp|P04196|HRG_HUMAN Histidine-rich glycoprotein OS=Homo sapiens OX=9606 GN=HRG PE=1 SV=1	1	13	13	13	25.5	59.578	372810	1684300	1864900	1472800	332730	1144200	1944800	999720	862520	445500	685890	668690	711030	1.22703e+06	674726	1.81856	0.0843695
sp|P02775|CXCL7_HUMAN	PPBP	sp|P02775|CXCL7_HUMAN Platelet basic protein OS=Homo sapiens OX=9606 GN=PPBP PE=1 SV=3	1	4	4	4	26.6	13.894		147120	59775				237090	76143		52035	90373	72255		130032	71554.3	1.81725	0.28362
sp|P01871|IGHM_HUMAN;sp|P0DOX6|IGM_HUMAN	IGHM	sp|P01871|IGHM_HUMAN Immunoglobulin heavy constant mu OS=Homo sapiens OX=9606 GN=IGHM PE=1 SV=4;sp|P0DOX6|IGM_HUMAN Immunoglobulin mu heavy chain OS=Homo sapiens OX=9606 PE=1 SV=2	2	15	15	15	38	49.439	8320900	7298200	27096000	14304000	6919300	24778000	16704000	20742000	2192600	20747000	9963000	5774200	5500000	15770300	8835360	1.78491	0.141994
sp|P22352|GPX3_HUMAN	GPX3	sp|P22352|GPX3_HUMAN Glutathione peroxidase 3 OS=Homo sapiens OX=9606 GN=GPX3 PE=1 SV=2	1	6	6	6	29.2	25.552	527760	6869900	563550	963140	318500	2137000	449810	206700		105590	2455000	599510	225660	1504545	846440	1.7775	0.598726
sp|O60437|PEPL_HUMAN	PPL	sp|O60437|PEPL_HUMAN Periplakin OS=Homo sapiens OX=9606 GN=PPL PE=1 SV=4	1	6	6	6	3.9	204.74		11219		60851			13646	72312			18365	34977	13911	39507	22417.7	1.76232	0.420127
sp|P01701|LV151_HUMAN	IGLV1-51	sp|P01701|LV151_HUMAN Immunoglobulin lambda variable 1-51 OS=Homo sapiens OX=9606 GN=IGLV1-51 PE=1 SV=2	1	2	2	2	13.7	12.249	562390	1562300	599060	414430		2252300	1794600	970190	533600	1067300	797090	339040	585550	1.16504e+06	664516	1.75321	0.169351
sp|P02654|APOC1_HUMAN	APOC1	sp|P02654|APOC1_HUMAN Apolipoprotein C-I OS=Homo sapiens OX=9606 GN=APOC1 PE=1 SV=1	1	3	3	3	24.1	9.3318	251150	345830	756330	209140	201910	366760	501610	803780	176910	256360	362460	318820	117940	429564	246498	1.74267	0.134791
sp|Q9Y6R7|FCGBP_HUMAN	FCGBP	sp|Q9Y6R7|FCGBP_HUMAN IgGFc-binding protein OS=Homo sapiens OX=9606 GN=FCGBP PE=1 SV=3	1	33	33	33	13	572.01		457130	86930	361200	66440		1314700	64365	851900	23053	112280	48111	92710	391794	225611	1.73659	0.538517
sp|P08294|SODE_HUMAN	SOD3	sp|P08294|SODE_HUMAN Extracellular superoxide dismutase [Cu-Zn] OS=Homo sapiens OX=9606 GN=SOD3 PE=1 SV=2	1	7	7	7	37.1	25.851	109740	669150	102280	167590		230840	105670	125480			125030	95413	152410	215821	124284	1.73651	0.478004
sp|P01599|KV117_HUMAN	IGKV1-17	sp|P01599|KV117_HUMAN Immunoglobulin kappa variable 1-17 OS=Homo sapiens OX=9606 GN=IGKV1-17 PE=1 SV=2	1	3	3	1	23.1	12.778	147310	143160	254900	130530		137250	486830	318790	146910	166930	179010	95330	86015	231253	134839	1.71503	0.154714
sp|P02792|FRIL_HUMAN	FTL	sp|P02792|FRIL_HUMAN Ferritin light chain OS=Homo sapiens OX=9606 GN=FTL PE=1 SV=2	1	8	8	8	40	20.019		263180	164100	49968			850490	48550			40959	384430	65146	275258	163512	1.68341	0.621525
sp|P04003|C4BPA_HUMAN;CON__Q28065	C4BPA	sp|P04003|C4BPA_HUMAN C4b-binding protein alpha chain OS=Homo sapiens OX=9606 GN=C4BPA PE=1 SV=2	2	22	22	22	43.9	67.033	911980	1186900	2752900	549490	1098100	1181100	1675300	2481200	109340	1071900	1355300	767660	1115900	1.47962e+06	884020	1.67374	0.153014
sp|P08123|CO1A2_HUMAN	COL1A2	sp|P08123|CO1A2_HUMAN Collagen alpha-2(I) chain OS=Homo sapiens OX=9606 GN=COL1A2 PE=1 SV=7	1	11	11	10	10.5	129.31	1251000	947510	3943100	7486800	437540	8911800	8313100	2898600	2863800	607470	1607400	615980	7203600	4.27368e+06	2579650	1.65669	0.378238
sp|P01019|ANGT_HUMAN	AGT	sp|P01019|ANGT_HUMAN Angiotensinogen OS=Homo sapiens OX=9606 GN=AGT PE=1 SV=1	1	10	10	10	24.9	53.154	289540	1493900	1240500	672030		215450	1996100	995660	398260	353940	909000	911970	410440	986169	596722	1.65264	0.241248
sp|P0DOX3|IGD_HUMAN;sp|P01880|IGHD_HUMAN	IGHD	sp|P0DOX3|IGD_HUMAN Immunoglobulin delta heavy chain OS=Homo sapiens OX=9606 PE=1 SV=1;sp|P01880|IGHD_HUMAN Immunoglobulin heavy constant delta OS=Homo sapiens OX=9606 GN=IGHD PE=1 SV=3	2	7	7	7	17.2	56.224			335500	99445		229700	202590	116580		184330	89307	124960	81569	196763	120042	1.63912	0.187185
sp|P13987|CD59_HUMAN	CD59	sp|P13987|CD59_HUMAN CD59 glycoprotein OS=Homo sapiens OX=9606 GN=CD59 PE=1 SV=1	1	4	4	4	25	14.177	59322	595410	126150	240440	67351	256890	162710	183130	77713	104360	259680	94619	109090	211425	129092	1.63778	0.33591
sp|P02749|APOH_HUMAN;CON__P17690	APOH	sp|P02749|APOH_HUMAN Beta-2-glycoprotein 1 OS=Homo sapiens OX=9606 GN=APOH PE=1 SV=3	2	12	12	12	35.1	38.298	292630	5038900	917080	929290	995290	1579500	3172800	1929700	559080	1386600	1554700	1298200	874490	1.8569e+06	1134614	1.63659	0.337226
sp|P00738|HPT_HUMAN	HP	sp|P00738|HPT_HUMAN Haptoglobin OS=Homo sapiens OX=9606 GN=HP PE=1 SV=1	1	27	27	12	56.9	45.205	75379000	1025800	76943000	16806000	21480000	34801000	75268000	67302000	23373000	496160	50525000	15573000	50989000	46125600	28191232	1.63617	0.287149
sp|P00734|THRB_HUMAN;CON__P00735	F2	sp|P00734|THRB_HUMAN Prothrombin OS=Homo sapiens OX=9606 GN=F2 PE=1 SV=2	2	24	24	24	48.1	70.036	156820	2921600	1406500	980640		226010	1337300	1318400	327730	228590	1041200	1520500	578240	1.19247e+06	739252	1.61307	0.351804
sp|P01024|CO3_HUMAN;CON__Q2UVX4	C3	sp|P01024|CO3_HUMAN Complement C3 OS=Homo sapiens OX=9606 GN=C3 PE=1 SV=2	2	82	82	82	52	187.15	8880900	91021000	42408000	19822000	6067500	21846000	39405000	31486000	14453000	17650000	31372000	20738000	16993000	32617050	20241200	1.61142	0.342925
sp|P01861|IGHG4_HUMAN	IGHG4	sp|P01861|IGHG4_HUMAN Immunoglobulin heavy constant gamma 4 OS=Homo sapiens OX=9606 GN=IGHG4 PE=1 SV=1	1	9	4	4	44	35.94	1275000	5106200	1172500	1408100	1647100	6060700	6678900	3504000		2335300	3831800	954840	1259300	3.35656e+06	2095310	1.60194	0.34039
sp|Q96P63|SPB12_HUMAN	SERPINB12	sp|Q96P63|SPB12_HUMAN Serpin B12 OS=Homo sapiens OX=9606 GN=SERPINB12 PE=1 SV=1	1	5	5	5	13.1	46.276				88201	341710	110070	48374		99112	57074	28392		183740	147089	92079.5	1.59741	0.48686
sp|P51888|PRELP_HUMAN	PRELP	sp|P51888|PRELP_HUMAN Prolargin OS=Homo sapiens OX=9606 GN=PRELP PE=1 SV=1	1	12	12	12	37.4	43.809	298770	2291400	806140	1106400		910060	743180	243840		54691	863110	243520	1139900	914256	575305	1.58917	0.413796
sp|Q9NZT1|CALL5_HUMAN	CALML5	sp|Q9NZT1|CALL5_HUMAN Calmodulin-like protein 5 OS=Homo sapiens OX=9606 GN=CALML5 PE=1 SV=2	1	6	6	6	39	15.892			59849	225300	422780	268160		1505800		444840	212630	100040	502320	496378	314958	1.57602	0.570949
sp|P68371|TBB4B_HUMAN;sp|P04350|TBB4A_HUMAN;sp|Q3ZCM7|TBB8_HUMAN	TUBB4B	sp|P68371|TBB4B_HUMAN Tubulin beta-4B chain OS=Homo sapiens OX=9606 GN=TUBB4B PE=1 SV=1;sp|P04350|TBB4A_HUMAN Tubulin beta-4A chain OS=Homo sapiens OX=9606 GN=TUBB4A PE=1 SV=2;sp|Q3ZCM7|TBB8_HUMAN Tubulin beta-8 chain OS=Homo sapiens OX=9606 GN=TUBB8 PE=1	3	12	12	3	32.1	49.83	160180	761400	308320	861260	310080	380440	485470	308150	87414	98855	478610	536600	232770	446912	286850	1.558	0.251945
sp|P01591|IGJ_HUMAN	JCHAIN	sp|P01591|IGJ_HUMAN Immunoglobulin J chain OS=Homo sapiens OX=9606 GN=JCHAIN PE=1 SV=4	1	5	5	5	37.1	18.098	617330	1204700	1695500	508970	1339600	1250700	1129000	1123500	200710	1049300	1053000	318850	947240	1.10866e+06	713820	1.55314	0.108572
sp|Q96PD5|PGRP2_HUMAN;CON__ENSEMBL:ENSBTAP00000016285	PGLYRP2	sp|Q96PD5|PGRP2_HUMAN N-acetylmuramoyl-L-alanine amidase OS=Homo sapiens OX=9606 GN=PGLYRP2 PE=1 SV=1	2	7	7	7	20.8	62.216		576050	290400	148310		141270	651260	354450			242650	272170	182030	360290	232283	1.55108	0.354386
sp|P01009|A1AT_HUMAN	SERPINA1	sp|P01009|A1AT_HUMAN Alpha-1-antitrypsin OS=Homo sapiens OX=9606 GN=SERPINA1 PE=1 SV=3	1	28	28	28	56.2	46.736	45370000	44557000	64814000	72676000	17473000	19911000	54686000	63301000	42399000	23570000	32623000	26776000	29806000	47848500	31034800	1.54177	0.107552
sp|O43866|CD5L_HUMAN	CD5L	sp|O43866|CD5L_HUMAN CD5 antigen-like OS=Homo sapiens OX=9606 GN=CD5L PE=1 SV=1	1	10	10	10	39.5	38.087	178190	292840	1134800	507150	246190	980820	535730	798210		694800	351050	230200	242000	584241	379512	1.53945	0.319826
sp|P31944|CASPE_HUMAN	CASP14	sp|P31944|CASPE_HUMAN Caspase-14 OS=Homo sapiens OX=9606 GN=CASP14 PE=1 SV=2	1	4	4	4	18.6	27.679			190830	26349	409140	37431	8360.9	42536		17872	22668	19241	254160	119108	78485.2	1.51758	0.671742
sp|P02746|C1QB_HUMAN	C1QB	sp|P02746|C1QB_HUMAN Complement C1q subcomponent subunit B OS=Homo sapiens OX=9606 GN=C1QB PE=1 SV=3	1	4	4	4	20.6	26.721		134750	395130	133190		78070	364560	386570		143170	235130	113610		248712	163970	1.51681	0.385453
sp|P0DOX5|IGG1_HUMAN;sp|P01857|IGHG1_HUMAN	IGHG1	sp|P0DOX5|IGG1_HUMAN Immunoglobulin gamma-1 heavy chain OS=Homo sapiens OX=9606 PE=1 SV=2;sp|P01857|IGHG1_HUMAN Immunoglobulin heavy constant gamma 1 OS=Homo sapiens OX=9606 GN=IGHG1 PE=1 SV=1	2	19	19	11	49.4	49.328	67946000	173170000	79481000	59487000	46160000	91294000	143080000	108200000	88858000	57580000	68336000	54079000	54687000	96102250	64708000	1.48517	0.152009
sp|P02675|FIBB_HUMAN;CON__P02676	FGB	sp|P02675|FIBB_HUMAN Fibrinogen beta chain OS=Homo sapiens OX=9606 GN=FGB PE=1 SV=2	2	24	24	24	51.9	55.928	8327600	12404000	12747000	3481200	4359200	7750600	16280000	13699000	1621500	8154000	11301000	4727200	7696300	9881075	6700000	1.47479	0.21997
sp|P05155|IC1_HUMAN	SERPING1	sp|P05155|IC1_HUMAN Plasma protease C1 inhibitor OS=Homo sapiens OX=9606 GN=SERPING1 PE=1 SV=2	1	12	12	12	25.8	55.154	1458000	6691400	5509800	2479900	263180	1706900	4813800	3586400	3778500	1015600	2888900	2271400	1370200	3.31367e+06	2264920	1.46304	0.353238
sp|P01031|CO5_HUMAN;CON__Q1A7A4	C5	sp|P01031|CO5_HUMAN Complement C5 OS=Homo sapiens OX=9606 GN=C5 PE=1 SV=4	2	27	27	27	18.9	188.3		707920	1440800	465040	84368	260900	1408600	862870		389260	810550	536990	318290	747214	513772	1.45437	0.43033
sp|P02748|CO9_HUMAN;CON__Q3MHN2	C9	sp|P02748|CO9_HUMAN Complement component C9 OS=Homo sapiens OX=9606 GN=C9 PE=1 SV=2	2	12	12	12	26.1	63.173	192360	1588900	1222900	888760	90105	359700	1180000	836220	422680	294490	769320	491310	771280	794868	549816	1.4457	0.357499
sp|P01624|KV315_HUMAN	IGKV3-15	sp|P01624|KV315_HUMAN Immunoglobulin kappa variable 3-15 OS=Homo sapiens OX=9606 GN=IGKV3-15 PE=1 SV=2	1	3	3	0	26.1	12.496	1233700	2116500	959130	528970		1558900	2109400	1183400		1099800	1074300	709020		1.38429e+06	961040	1.4404	0.2721
sp|P63000|RAC1_HUMAN;sp|P60763|RAC3_HUMAN;sp|P15153|RAC2_HUMAN	RAC1	sp|P63000|RAC1_HUMAN Ras-related C3 botulinum toxin substrate 1 OS=Homo sapiens OX=9606 GN=RAC1 PE=1 SV=1;sp|P60763|RAC3_HUMAN Ras-related C3 botulinum toxin substrate 3 OS=Homo sapiens OX=9606 GN=RAC3 PE=1 SV=1;sp|P15153|RAC2_HUMAN Ras-related C3 botulinu	3	3	3	2	18.2	21.45		71497	31783				64943	59581			44817	43888	30116	56951	39607	1.4379	0.178118
sp|P01859|IGHG2_HUMAN	IGHG2	sp|P01859|IGHG2_HUMAN Immunoglobulin heavy constant gamma 2 OS=Homo sapiens OX=9606 GN=IGHG2 PE=1 SV=2	1	13	7	6	44.2	35.9	19547000	32800000	9907200	12430000	2650400	13998000	24274000	6860600	10295000	17930000	3363700	6214700	15534000	15308400	10667480	1.43505	0.367343
sp|Q9NZP8|C1RL_HUMAN	C1RL	sp|Q9NZP8|C1RL_HUMAN Complement C1r subcomponent-like protein OS=Homo sapiens OX=9606 GN=C1RL PE=1 SV=2	1	2	2	2	4.5	53.498		49747		55658			64447	52613			41608	26868	48011	55616.2	38829	1.43234	0.0480844
sp|A0A0B4J1Y9|HV372_HUMAN	IGHV3-72	sp|A0A0B4J1Y9|HV372_HUMAN Immunoglobulin heavy variable 3-72 OS=Homo sapiens OX=9606 GN=IGHV3-72 PE=3 SV=1	1	3	3	3	29.4	13.203		336170	259370	337770		325290	560560	219880	315360	253710	205660	116920	296050	339840	237540	1.43066	0.134726
sp|P07357|CO8A_HUMAN	C8A	sp|P07357|CO8A_HUMAN Complement component C8 alpha chain OS=Homo sapiens OX=9606 GN=C8A PE=1 SV=2	1	11	11	11	27.4	65.163	127410	1086300	433530	325110	189910	424280	500470	402210	249280	278520	431010	263000	305310	436152	305424	1.42802	0.354056
sp|P36955|PEDF_HUMAN;CON__Q95121	SERPINF1	sp|P36955|PEDF_HUMAN Pigment epithelium-derived factor OS=Homo sapiens OX=9606 GN=SERPINF1 PE=1 SV=4	2	10	10	10	24.9	46.312	135270	1895100	456460	519530		811620	971100	301340	1057400	198960	689200	320860	290230	727203	511330	1.42218	0.48552
sp|P06312|KV401_HUMAN	IGKV4-1	sp|P06312|KV401_HUMAN Immunoglobulin kappa variable 4-1 OS=Homo sapiens OX=9606 GN=IGKV4-1 PE=1 SV=1	1	4	4	4	29.8	13.38	957420	1415200	643030	420490	292150	1102100	1026800	671000	806850	643050	522200	411760	485710	816024	573914	1.42186	0.203042
sp|P21333|FLNA_HUMAN	FLNA	sp|P21333|FLNA_HUMAN Filamin-A OS=Homo sapiens OX=9606 GN=FLNA PE=1 SV=4	1	42	42	41	22.4	280.74		395410	553150	631720	166820	281500	1116600	575120		76339	396650	903900	126820	531474	375927	1.41377	0.475511
sp|P19827|ITIH1_HUMAN;CON__Q0VCM5	ITIH1	sp|P19827|ITIH1_HUMAN Inter-alpha-trypsin inhibitor heavy chain H1 OS=Homo sapiens OX=9606 GN=ITIH1 PE=1 SV=3	2	17	17	17	27.6	101.39	463470	1223100	2671200	949190	201150	777690	2327700	1960000	575910	574540	1058600	1519400	979990	1.32169e+06	941688	1.40353	0.397081
sp|P02787|TRFE_HUMAN;CON__Q2HJF0	TF	sp|P02787|TRFE_HUMAN Serotransferrin OS=Homo sapiens OX=9606 GN=TF PE=1 SV=3	2	59	59	57	65.9	77.063	155900000	255090000	147190000	220690000	135180000	294220000	156870000	162310000	164300000	188540000	124280000	82125000	123690000	190931250	136587000	1.39787	0.0983408
sp|P68104|EF1A1_HUMAN;sp|Q5VTE0|EF1A3_HUMAN;sp|Q05639|EF1A2_HUMAN	EEF1A1	sp|P68104|EF1A1_HUMAN Elongation factor 1-alpha 1 OS=Homo sapiens OX=9606 GN=EEF1A1 PE=1 SV=1;sp|Q5VTE0|EF1A3_HUMAN Putative elongation factor 1-alpha-like 3 OS=Homo sapiens OX=9606 GN=EEF1A1P5 PE=5 SV=1;sp|Q05639|EF1A2_HUMAN Elongation factor 1-alpha 2 OS	3	7	7	7	19.9	50.14	303810	417220	151310	518940	505880	398010	300550	281650	177700	156730	280750	225710	447530	359671	257684	1.39578	0.168267
sp|P23142|FBLN1_HUMAN;CON__ENSEMBL:ENSBTAP00000016046	FBLN1	sp|P23142|FBLN1_HUMAN Fibulin-1 OS=Homo sapiens OX=9606 GN=FBLN1 PE=1 SV=4	2	15	15	15	28.3	77.213	263850	827700	372780	798770	382630	356860	905390	617000	651290	94223	374700	532720	412460	565622	413079	1.36929	0.283934
sp|Q03591|FHR1_HUMAN;sp|Q9BXR6|FHR5_HUMAN	CFHR1	sp|Q03591|FHR1_HUMAN Complement factor H-related protein 1 OS=Homo sapiens OX=9606 GN=CFHR1 PE=1 SV=2	2	7	4	2	22.7	37.65	124680	550530	349310	167020	255940	607450	510480	247570	119730	418070	295950	142520	308010	351622	256856	1.36895	0.334083
sp|P07225|PROS_HUMAN	PROS1	sp|P07225|PROS_HUMAN Vitamin K-dependent protein S OS=Homo sapiens OX=9606 GN=PROS1 PE=1 SV=1	1	10	10	10	18.5	75.122		313080	66462	49779			88119	178550	105190	146650	100560	128890	28355	139198	101929	1.36564	0.500593
sp|P06331|HV434_HUMAN;sp|P01825|HV459_HUMAN;sp|P0DP08|HVD82_HUMAN;sp|P0DP06|HVD34_HUMAN;sp|A0A0C4DH41|HV461_HUMAN;sp|P01824|HV439_HUMAN;sp|A0A075B6R2|HV404_HUMAN;sp|P0DP07|HV431_HUMAN;sp|A0A087WSY4|HV432_HUMAN	IGHV4-34	sp|P06331|HV434_HUMAN Immunoglobulin heavy variable 4-34 OS=Homo sapiens OX=9606 GN=IGHV4-34 PE=1 SV=2;sp|P01825|HV459_HUMAN Immunoglobulin heavy variable 4-59 OS=Homo sapiens OX=9606 GN=IGHV4-59 PE=1 SV=2;sp|P0DP08|HVD82_HUMAN Immunoglobulin heavy variabl	9	3	3	3	37.4	13.815	356750	1419400	893700	413480		370080	1747700	1127600		448430	784710	771910		904101	668350	1.35274	0.50591
sp|A0A0B4J1X5|HV374_HUMAN;sp|P01767|HV353_HUMAN;sp|A0A0C4DH42|HV366_HUMAN;sp|P0DP02|HVC33_HUMAN;sp|P01772|HV333_HUMAN	IGHV3-74	sp|A0A0B4J1X5|HV374_HUMAN Immunoglobulin heavy variable 3-74 OS=Homo sapiens OX=9606 GN=IGHV3-74 PE=3 SV=1;sp|P01767|HV353_HUMAN Immunoglobulin heavy variable 3-53 OS=Homo sapiens OX=9606 GN=IGHV3-53 PE=1 SV=2;sp|A0A0C4DH42|HV366_HUMAN Immunoglobulin heavy	5	3	2	1	31.6	12.839		268150	282480	177580		120870	499810	83934	169180	303020	152000	141960	118570	238804	176946	1.34959	0.423725
sp|P02679|FIBG_HUMAN	FGG	sp|P02679|FIBG_HUMAN Fibrinogen gamma chain OS=Homo sapiens OX=9606 GN=FGG PE=1 SV=3	1	21	21	21	51.7	51.511	7587500	10507000	10806000	3211800	5228900	8023500	12708000	12846000	2006300	7803800	9179500	4675100	9468400	8.86484e+06	6626620	1.33776	0.270117
sp|Q14624|ITIH4_HUMAN;CON__Q3T052	ITIH4	sp|Q14624|ITIH4_HUMAN Inter-alpha-trypsin inhibitor heavy chain H4 OS=Homo sapiens OX=9606 GN=ITIH4 PE=1 SV=4	2	20	20	20	24.1	103.36	1700700	1273300	4208100	2244700	920930	2047100	3768200	4064600	1932000	1680400	2051900	1913600	1912800	2.52845e+06	1898140	1.33207	0.311476
sp|P05156|CFAI_HUMAN;CON__Q32PI4	CFI	sp|P05156|CFAI_HUMAN Complement factor I OS=Homo sapiens OX=9606 GN=CFI PE=1 SV=2	2	18	18	18	37.6	65.75	597650	3820900	1132800	751620	583330	1657500	1397100	1412800	1063300	1216300	1324500	580540	1180000	1.41921e+06	1072928	1.32275	0.492835
sp|A0A0B4J1V0|HV315_HUMAN	IGHV3-15	sp|A0A0B4J1V0|HV315_HUMAN Immunoglobulin heavy variable 3-15 OS=Homo sapiens OX=9606 GN=IGHV3-15 PE=3 SV=1	1	2	2	2	20.2	12.926		181830	172290	102080			275580	143000		203400	136120	57370		174956	132297	1.32245	0.418937
sp|P0DOX2|IGA2_HUMAN		sp|P0DOX2|IGA2_HUMAN Immunoglobulin alpha-2 heavy chain OS=Homo sapiens OX=9606 PE=1 SV=2	1	9	8	2	26.2	48.934	4336400	3973000	1941100	1337600	968760	3679200	4049700	2019600	1750900	3095500	2093900	1513100	2142700	2788170	2119220	1.31566	0.326574
sp|P25311|ZA2G_HUMAN	AZGP1	sp|P25311|ZA2G_HUMAN Zinc-alpha-2-glycoprotein OS=Homo sapiens OX=9606 GN=AZGP1 PE=1 SV=2	1	10	10	10	37.9	34.258	3399600	4515400	2671800	3049500	1855200	3453300	3873200	2755800	4358100	2772800	1889500	1133900	2106000	3196725	2452060	1.30369	0.208315
sp|P21291|CSRP1_HUMAN	CSRP1	sp|P21291|CSRP1_HUMAN Cysteine and glycine-rich protein 1 OS=Homo sapiens OX=9606 GN=CSRP1 PE=1 SV=3	1	7	7	7	50.3	20.567		52207	36652	43929		60989	136060	34652			52307	53131	35088	60748.2	46842	1.29687	0.566824
sp|P00450|CERU_HUMAN	CP	sp|P00450|CERU_HUMAN Ceruloplasmin OS=Homo sapiens OX=9606 GN=CP PE=1 SV=1	1	31	31	26	29	122.2	6328700	5221300	11168000	6755900	3175500	5910900	7600100	7173300	8217500	4821400	4124100	2341600	6262500	6.66671e+06	5153420	1.29365	0.264459
sp|P01008|ANT3_HUMAN;CON__P41361	SERPINC1	sp|P01008|ANT3_HUMAN Antithrombin-III OS=Homo sapiens OX=9606 GN=SERPINC1 PE=1 SV=1	2	15	15	15	33.6	52.602	2362400	4895900	6509200	4920600	1310100	1644400	5660100	6093100	5204000	2046400	3246000	3364000	2288900	4174475	3229860	1.29246	0.382564
sp|P02765|FETUA_HUMAN	AHSG	sp|P02765|FETUA_HUMAN Alpha-2-HS-glycoprotein OS=Homo sapiens OX=9606 GN=AHSG PE=1 SV=2	1	6	6	4	21.3	39.34	620750	2287300	1170900	3231100	11609000	1322200	1676000	1940700	4562700	959650	1863600	1601600	2569900	2.98224e+06	2311490	1.29018	0.699577
sp|P19823|ITIH2_HUMAN;CON__Q9TRI1	ITIH2	sp|P19823|ITIH2_HUMAN Inter-alpha-trypsin inhibitor heavy chain H2 OS=Homo sapiens OX=9606 GN=ITIH2 PE=1 SV=2	2	19	19	19	21.7	106.46	1433200	2810200	6818400	2979000	952210	2982900	5524000	4701200	3561100	1649100	2608200	3206400	2641100	3.52514e+06	2733180	1.28976	0.421377
sp|O75882|ATRN_HUMAN	ATRN	sp|O75882|ATRN_HUMAN Attractin OS=Homo sapiens OX=9606 GN=ATRN PE=1 SV=2	1	15	15	15	15.9	158.54	208360	296430	305470	225280	109830	165240	237010	301510	173400	187630	165820	139080	235040	231141	180194	1.28274	0.163459
sp|P03952|KLKB1_HUMAN;sp|P20718|GRAH_HUMAN	KLKB1	sp|P03952|KLKB1_HUMAN Plasma kallikrein OS=Homo sapiens OX=9606 GN=KLKB1 PE=1 SV=1	2	16	16	16	31.2	71.369	126610	377340	692450	398400		275740	565370	610080	177750	445180	375970	306530	409510	435141	342988	1.26868	0.37208
sp|P04217|A1BG_HUMAN	A1BG	sp|P04217|A1BG_HUMAN Alpha-1B-glycoprotein OS=Homo sapiens OX=9606 GN=A1BG PE=1 SV=4	1	10	10	10	28.5	54.253	2995600	1570200	2770800	2545900	1058700	1798000	3118000	3149800	2737800	1913300	1876800	1192500	1651600	2375875	1874400	1.26754	0.247185
sp|P02545|LMNA_HUMAN	LMNA	sp|P02545|LMNA_HUMAN Prelamin-A/C OS=Homo sapiens OX=9606 GN=LMNA PE=1 SV=1	1	23	23	23	40.2	74.139	165010	488350	487250	394460	851800	354470	932530	1264500	212170	339800	745130	547710	591010	617296	487164	1.26712	0.487074
sp|P01023|A2MG_HUMAN;CON__ENSEMBL:ENSBTAP00000024146	A2M	sp|P01023|A2MG_HUMAN Alpha-2-macroglobulin OS=Homo sapiens OX=9606 GN=A2M PE=1 SV=3	2	53	53	49	42.1	163.29	32618000	14341000	46897000	33901000	9427300	17536000	32985000	51861000	12323000	40086000	25354000	31368000	9216700	2.99458e+07	23669540	1.26516	0.461252
sp|P02671|FIBA_HUMAN	FGA	sp|P02671|FIBA_HUMAN Fibrinogen alpha chain OS=Homo sapiens OX=9606 GN=FGA PE=1 SV=2	1	24	24	24	41.9	94.972	6573800	9274200	13237000	3482800	5392500	7394000	14533000	11783000	1572900	10310000	11167000	3678900	8737600	8.95879e+06	7093280	1.263	0.435786
sp|P08603|CFAH_HUMAN	CFH	sp|P08603|CFAH_HUMAN Complement factor H OS=Homo sapiens OX=9606 GN=CFH PE=1 SV=4	1	41	41	37	41.8	139.09	1978200	3357600	4517700	2474900	2253100	2964300	6018800	5277200	2594200	3103400	3544300	1793200	3389500	3605225	2884920	1.24968	0.340526
sp|P14618|KPYM_HUMAN	PKM	sp|P14618|KPYM_HUMAN Pyruvate kinase PKM OS=Homo sapiens OX=9606 GN=PKM PE=1 SV=4	1	23	23	22	49.2	57.936	731260	1547800	453410	1256500	1015700	943200	1040100	578050	341450	326080	906090	1458300	761640	945752	758712	1.24652	0.430628
sp|P02760|AMBP_HUMAN	AMBP	sp|P02760|AMBP_HUMAN Protein AMBP OS=Homo sapiens OX=9606 GN=AMBP PE=1 SV=1	1	10	10	10	32.7	38.999	1067800	1183200	2415000	1661300	624100	1207800	2619400	2247200	1793000	521990	1582200	1158100	1505700	1628225	1312198	1.24084	0.413146
sp|P08185|CBG_HUMAN	SERPINA6	sp|P08185|CBG_HUMAN Corticosteroid-binding globulin OS=Homo sapiens OX=9606 GN=SERPINA6 PE=1 SV=1	1	5	5	5	14.1	45.14	397870	120700	416320	294780		142940	257250	431820	421150	219950	227350	105760	220800	294526	239002	1.23231	0.457733
sp|P01860|IGHG3_HUMAN	IGHG3	sp|P01860|IGHG3_HUMAN Immunoglobulin heavy constant gamma 3 OS=Homo sapiens OX=9606 GN=IGHG3 PE=1 SV=2	1	15	9	6	51.5	41.287	9546800	13012000	11104000	12510000	5195100	23390000	18709000	14801000	8131300	23961000	11714000	8356800	2798400	1.35335e+07	10992300	1.23118	0.509016
sp|P08670|VIME_HUMAN;sp|P17661|DESM_HUMAN;sp|P41219|PERI_HUMAN;sp|Q16352|AINX_HUMAN;sp|P07196|NFL_HUMAN;sp|P07197|NFM_HUMAN	VIM	sp|P08670|VIME_HUMAN Vimentin OS=Homo sapiens OX=9606 GN=VIM PE=1 SV=4	6	34	34	30	61.8	53.651	10066000	7571400	8747300	30768000	25350000	10923000	7430300	13618000	5850500	1693900	13738000	19427000	17404000	14309250	11622680	1.23115	0.586254
sp|P0DOX7|IGK_HUMAN		sp|P0DOX7|IGK_HUMAN Immunoglobulin kappa light chain OS=Homo sapiens OX=9606 PE=1 SV=1	1	10	10	2	57.5	23.379	59020000	40588000	44113000	44349000	19789000	70440000	58055000	59138000	38560000	73659000	26279000	28165000	40247000	49436500	41382000	1.19464	0.422726
sp|A0A075B6K4|LV310_HUMAN;sp|P01715|LV301_HUMAN	IGLV3-10	sp|A0A075B6K4|LV310_HUMAN Immunoglobulin lambda variable 3-10 OS=Homo sapiens OX=9606 GN=IGLV3-10 PE=3 SV=2	2	5	5	2	35.7	12.441	844050	1411800	983920	174930		1437100	1769600	731350	852750	1476700	676350	715170	702050	1.05039e+06	884604	1.18742	0.55683
sp|P80723|BASP1_HUMAN	BASP1	sp|P80723|BASP1_HUMAN Brain acid soluble protein 1 OS=Homo sapiens OX=9606 GN=BASP1 PE=1 SV=2	1	3	3	3	21.1	22.693		9872.7	25998	38354	26478		29521	17413			20287	15571	26795	24606.1	20884.3	1.17821	0.571654
sp|P36871|PGM1_HUMAN	PGM1	sp|P36871|PGM1_HUMAN Phosphoglucomutase-1 OS=Homo sapiens OX=9606 GN=PGM1 PE=1 SV=3	1	11	11	11	26.2	61.448	33009	270220	107240	267200			292990	28271		14044	170520	362150	19452	166488	141542	1.17625	0.790287
sp|P08697|A2AP_HUMAN;CON__P28800	SERPINF2	sp|P08697|A2AP_HUMAN Alpha-2-antiplasmin OS=Homo sapiens OX=9606 GN=SERPINF2 PE=1 SV=3	2	9	9	9	24	54.565		914550	1014400	1162400	257400	433180	1177800	903300	819530	487890	717280	703950	835410	837576	712812	1.17503	0.479124
sp|P07355|ANXA2_HUMAN;sp|A6NMY6|AXA2L_HUMAN	ANXA2	sp|P07355|ANXA2_HUMAN Annexin A2 OS=Homo sapiens OX=9606 GN=ANXA2 PE=1 SV=2;sp|A6NMY6|AXA2L_HUMAN Putative annexin A2-like protein OS=Homo sapiens OX=9606 GN=ANXA2P2 PE=5 SV=2	2	16	16	16	49.9	38.604	1862500	1080500	730320	1896200	1043000	1941200	1018400	1462500	491310	572630	1217000	2300900	1336100	1.37933e+06	1183588	1.16538	0.565935
sp|P0DOX8|IGL1_HUMAN;sp|B9A064|IGLL5_HUMAN;sp|P0CG04|IGLC1_HUMAN;sp|P01709|LV208_HUMAN	IGLL5	sp|P0DOX8|IGL1_HUMAN Immunoglobulin lambda-1 light chain OS=Homo sapiens OX=9606 PE=1 SV=1;sp|B9A064|IGLL5_HUMAN Immunoglobulin lambda-like polypeptide 5 OS=Homo sapiens OX=9606 GN=IGLL5 PE=2 SV=2;sp|P0CG04|IGLC1_HUMAN Immunoglobulin lambda constant 1 OS=H	4	9	9	3	47.7	22.83	31731000	28425000	23371000	24060000	21819000	49145000	35635000	29606000	23651000	44556000	20757000	11677000	30970000	30474000	26322200	1.15773	0.492039
sp|P43652|AFAM_HUMAN	AFM	sp|P43652|AFAM_HUMAN Afamin OS=Homo sapiens OX=9606 GN=AFM PE=1 SV=1	1	13	13	13	24	69.068	965410	1206500	1676000	1845700	411620	732240	2098300	1663900	1576400	612590	1183300	919420	1444000	1.32496e+06	1147142	1.15501	0.565434
sp|P19338|NUCL_HUMAN	NCL	sp|P19338|NUCL_HUMAN Nucleolin OS=Homo sapiens OX=9606 GN=NCL PE=1 SV=3	1	6	6	6	9.2	76.613		68728	39750	74411	113810		36791	39418			43597	57602	60258	62151.3	53819	1.15482	0.662525
sp|P00739|HPTR_HUMAN	HPR	sp|P00739|HPTR_HUMAN Haptoglobin-related protein OS=Homo sapiens OX=9606 GN=HPR PE=2 SV=2	1	19	4	4	45.4	39.029	38686	37624	174670	35341		73453	374290	171130		28834	220640	86659		129313	112044	1.15413	0.837607
sp|P01714|LV319_HUMAN	IGLV3-19	sp|P01714|LV319_HUMAN Immunoglobulin lambda variable 3-19 OS=Homo sapiens OX=9606 GN=IGLV3-19 PE=1 SV=2	1	3	3	3	27.7	12.042	376270	612120	447730	415120	324280	942510	746550	607390	578710	688970	480060	250230	426550	558996	484904	1.1528	0.518659
sp|Q13835|PKP1_HUMAN	PKP1	sp|Q13835|PKP1_HUMAN Plakophilin-1 OS=Homo sapiens OX=9606 GN=PKP1 PE=1 SV=2	1	4	4	4	6	82.86			11474	32841	507430	40852		10206	67633	54020	9069.4	35096	358840	120561	104932	1.14894	0.89638
sp|P09105|HBAT_HUMAN	HBQ1	sp|P09105|HBAT_HUMAN Hemoglobin subunit theta-1 OS=Homo sapiens OX=9606 GN=HBQ1 PE=1 SV=2	1	4	4	4	35.9	15.508		46769	36744				66856	36677		34390	50772	37079		46761.5	40747	1.14761	0.551154
sp|P60709|ACTB_HUMAN;sp|P63261|ACTG_HUMAN;sp|A5A3E0|POTEF_HUMAN	ACTB	sp|P60709|ACTB_HUMAN Actin, cytoplasmic 1 OS=Homo sapiens OX=9606 GN=ACTB PE=1 SV=1;sp|P63261|ACTG_HUMAN Actin, cytoplasmic 2 OS=Homo sapiens OX=9606 GN=ACTG1 PE=1 SV=1	3	16	16	6	52.8	41.736	10240000	6868500	10499000	14157000	7861400	8565500	10962000	9137900	7030800	7170500	8464400	11180000	9261000	9.78641e+06	8621340	1.13514	0.343789
sp|Q14520|HABP2_HUMAN	HABP2	sp|Q14520|HABP2_HUMAN Hyaluronan-binding protein 2 OS=Homo sapiens OX=9606 GN=HABP2 PE=1 SV=1	1	7	7	7	16.2	62.671		90938	107110	88365		102790	126180	142420		81742	107680	66435	133410	109634	97316.8	1.12657	0.45886
sp|P10909|CLUS_HUMAN	CLU	sp|P10909|CLUS_HUMAN Clusterin OS=Homo sapiens OX=9606 GN=CLU PE=1 SV=1	1	16	16	16	33.2	52.494	7247000	27032000	13670000	11612000	4182600	12296000	9542100	8083700	16586000	1229700	23039000	4918500	6632200	11708175	10481080	1.11708	0.78621
sp|P00747|PLMN_HUMAN;CON__P06868;sp|Q02325|PLGB_HUMAN	PLG	sp|P00747|PLMN_HUMAN Plasminogen OS=Homo sapiens OX=9606 GN=PLG PE=1 SV=2	3	34	34	33	52.7	90.568	883680	4597400	2903300	1468500	1364300	1829700	3795200	3894100	3022800	2375400	1895100	2329200	1981900	2.59202e+06	2320880	1.11683	0.684833
sp|Q02413|DSG1_HUMAN;sp|Q86SJ6|DSG4_HUMAN	DSG1	sp|Q02413|DSG1_HUMAN Desmoglein-1 OS=Homo sapiens OX=9606 GN=DSG1 PE=1 SV=2	2	10	10	10	12.4	113.75		49519	110770	358230	1717400	632010	31668	78911	483030	509560	116790	45032	750770	425501	381036	1.11669	0.884088
sp|P01042|KNG1_HUMAN;CON__P01045-1;CON__Q2KJ62;CON__P01044-1	KNG1	sp|P01042|KNG1_HUMAN Kininogen-1 OS=Homo sapiens OX=9606 GN=KNG1 PE=1 SV=2	4	22	22	22	31.8	71.957	2288500	4169100	5396800	5161300	2278600	2973600	6845700	5891900	6243900	1986300	3408900	2750500	5311800	4.37569e+06	3940280	1.1105	0.670228
sp|P02751|FINC_HUMAN	FN1	sp|P02751|FINC_HUMAN Fibronectin OS=Homo sapiens OX=9606 GN=FN1 PE=1 SV=5	1	34	34	34	19	272.32	289770	1136500	1186900	487970	501230	1028800	1266800	1212400	766600	659320	1053400	1084300	458700	888796	804464	1.10483	0.683104
sp|P02753|RET4_HUMAN	RBP4	sp|P02753|RET4_HUMAN Retinol-binding protein 4 OS=Homo sapiens OX=9606 GN=RBP4 PE=1 SV=3	1	6	6	6	25.9	23.01		617840	193080	256930	193730	153880	1019900	686190	725820	133090	512500	278220	411460	445936	412218	1.0818	0.849085
sp|P00558|PGK1_HUMAN;sp|P07205|PGK2_HUMAN	PGK1	sp|P00558|PGK1_HUMAN Phosphoglycerate kinase 1 OS=Homo sapiens OX=9606 GN=PGK1 PE=1 SV=3	2	17	17	17	51.6	44.614	652290	907010	803590	600670	282110	336100	827590	566170	163900	640580	608250	1310500	158430	621941	576332	1.07914	0.816556
sp|P02766|TTHY_HUMAN	TTR	sp|P02766|TTHY_HUMAN Transthyretin OS=Homo sapiens OX=9606 GN=TTR PE=1 SV=1	1	5	5	5	49	15.887	1569400	1973500	2064900	2219000	656240	1352100	2226300	3000500	3794400	913870	1580900	1454400	984400	1.88274e+06	1745594	1.07857	0.795037
sp|P09382|LEG1_HUMAN	LGALS1	sp|P09382|LEG1_HUMAN Galectin-1 OS=Homo sapiens OX=9606 GN=LGALS1 PE=1 SV=2	1	5	5	5	46.7	14.716	424730	364390	235120	331560	210590	228060	528180	456200	218820	121720	330500	726150	213700	347354	322178	1.07814	0.801236
sp|Q9HC38|GLOD4_HUMAN	GLOD4	sp|Q9HC38|GLOD4_HUMAN Glyoxalase domain-containing protein 4 OS=Homo sapiens OX=9606 GN=GLOD4 PE=1 SV=1	1	5	5	5	17.6	34.793		78787	71833	67921			54311	55835		45689	30662	106550	61146	65737.4	61011.8	1.07745	0.767308
sp|P02647|APOA1_HUMAN;CON__P15497	APOA1	sp|P02647|APOA1_HUMAN Apolipoprotein A-I OS=Homo sapiens OX=9606 GN=APOA1 PE=1 SV=1	2	20	20	20	63.7	30.777	38390000	23478000	76658000	49583000	21719000	28311000	65353000	62649000	59854000	38343000	33320000	36806000	45861000	45767625	42836800	1.06842	0.77908
sp|Q99880|H2B1L_HUMAN;sp|Q99879|H2B1M_HUMAN;sp|Q99877|H2B1N_HUMAN;sp|Q93079|H2B1H_HUMAN;sp|Q5QNW6|H2B2F_HUMAN;sp|P62807|H2B1C_HUMAN;sp|P58876|H2B1D_HUMAN;sp|P57053|H2BFS_HUMAN;sp|O60814|H2B1K_HUMAN;sp|Q8N257|H2B3B_HUMAN;sp|Q16778|H2B2E_HUMAN;sp|P33778|H2B1B_HUMAN;sp|P23527|H2B1O_HUMAN;sp|P06899|H2B1J_HUMAN;sp|Q96A08|H2B1A_HUMAN	H2BC13	sp|Q99880|H2B1L_HUMAN Histone H2B type 1-L OS=Homo sapiens OX=9606 GN=H2BC13 PE=1 SV=3;sp|Q99879|H2B1M_HUMAN Histone H2B type 1-M OS=Homo sapiens OX=9606 GN=H2BC14 PE=1 SV=3;sp|Q99877|H2B1N_HUMAN Histone H2B type 1-N OS=Homo sapiens OX=9606 GN=H2BC15 PE=1	15	3	3	3	28.6	13.952		259590	61519	81398	210130	148570		182190		102400	145110	182600	161110	157233	147805	1.06379	0.824081
sp|P02774|VTDB_HUMAN;CON__Q3MHN5;CON__ENSEMBL:ENSBTAP00000018229	GC	sp|P02774|VTDB_HUMAN Vitamin D-binding protein OS=Homo sapiens OX=9606 GN=GC PE=1 SV=2	3	23	23	23	51.5	52.917	6949500	11612000	15581000	14978000	4296400	7534400	14384000	14880000	14822000	9619800	7446900	7783500	13520000	1.12769e+07	10638440	1.06002	0.787942
sp|P00751|CFAB_HUMAN	CFB	sp|P00751|CFAB_HUMAN Complement factor B OS=Homo sapiens OX=9606 GN=CFB PE=1 SV=2	1	26	26	26	31.7	85.532	2573100	5827000	5325800	2914400	970020	3571900	6656700	5108900	3765500	3764900	4448200	2785100	4672900	4.11848e+06	3887320	1.05946	0.80416
sp|Q92820|GGH_HUMAN	GGH	sp|Q92820|GGH_HUMAN Gamma-glutamyl hydrolase OS=Homo sapiens OX=9606 GN=GGH PE=1 SV=2	1	2	2	2	7.9	35.964		27838	29479	31121			26557	28290		36792	21944	22468		28657	27068	1.0587	0.682507
sp|A0A075B6I0|LV861_HUMAN	IGLV8-61	sp|A0A075B6I0|LV861_HUMAN Immunoglobulin lambda variable 8-61 OS=Homo sapiens OX=9606 GN=IGLV8-61 PE=3 SV=7	1	2	2	2	14.8	12.814	163630	338470	305310	164580	52518	188880	136050	128320		210920	237620	76740		184720	175093	1.05498	0.881173
sp|A0A0C4DH31|HV118_HUMAN	IGHV1-18	sp|A0A0C4DH31|HV118_HUMAN Immunoglobulin heavy variable 1-18 OS=Homo sapiens OX=9606 GN=IGHV1-18 PE=3 SV=1	1	2	2	1	23.9	12.82		1205500	600250	200330			1438100	230520		831920	680390	586840		734940	699717	1.05034	0.920996
sp|P04406|G3P_HUMAN	GAPDH	sp|P04406|G3P_HUMAN Glyceraldehyde-3-phosphate dehydrogenase OS=Homo sapiens OX=9606 GN=GAPDH PE=1 SV=3	1	9	9	9	34.3	36.053	1739300	2289300	3001100	2616300	523880	870030	2786100	1722200	385800	3508700	2288100	2532300	672060	1.94353e+06	1877392	1.03523	0.915622
sp|P0DOY2|IGLC2_HUMAN;sp|P0DOY3|IGLC3_HUMAN;sp|P0CF74|IGLC6_HUMAN	IGLC2	sp|P0DOY2|IGLC2_HUMAN Immunoglobulin lambda constant 2 OS=Homo sapiens OX=9606 GN=IGLC2 PE=1 SV=1;sp|P0DOY3|IGLC3_HUMAN Immunoglobulin lambda constant 3 OS=Homo sapiens OX=9606 GN=IGLC3 PE=1 SV=1	3	8	3	2	88.7	11.293	1145600	19089000	17559000	17236000	17944000	40998000	20964000	24443000	28196000	26145000	14784000	9431200	18239000	19922325	19359040	1.0291	0.922383
sp|P01717|LV325_HUMAN	IGLV3-25	sp|P01717|LV325_HUMAN Immunoglobulin lambda variable 3-25 OS=Homo sapiens OX=9606 GN=IGLV3-25 PE=1 SV=2	1	4	3	1	36.6	12.011	231540	209550	223370	264640	283480	434150	439440	473830	351090	443640	203480	181550	376280	320000	311208	1.02825	0.892391
sp|Q96CX2|KCD12_HUMAN	KCTD12	sp|Q96CX2|KCD12_HUMAN BTB/POZ domain-containing protein KCTD12 OS=Homo sapiens OX=9606 GN=KCTD12 PE=1 SV=1	1	5	5	5	21.5	35.7		31565	65275	255370			54781	32443			32095	174980	49524	87886.8	85533	1.02752	0.97244
sp|P06727|APOA4_HUMAN;CON__Q32PJ2	APOA4	sp|P06727|APOA4_HUMAN Apolipoprotein A-IV OS=Homo sapiens OX=9606 GN=APOA4 PE=1 SV=3	2	28	28	28	64.4	45.398	926610	1973700	3701500	5359800	2056100	2344400	5708100	8205200	6065700	1319700	3707600	2386400	4950800	3.78443e+06	3686040	1.02669	0.940819
sp|O75636|FCN3_HUMAN	FCN3	sp|O75636|FCN3_HUMAN Ficolin-3 OS=Homo sapiens OX=9606 GN=FCN3 PE=1 SV=2	1	4	4	4	16.4	32.903	61798	29998	260800	49409		83673	211060	187920		296590	89060	57950	49234	126380	123208	1.02574	0.961011
sp|P31946|1433B_HUMAN	YWHAB	sp|P31946|1433B_HUMAN 14-3-3 protein beta/alpha OS=Homo sapiens OX=9606 GN=YWHAB PE=1 SV=3	1	8	5	4	37.4	28.082	184770	350650	356600	559520	345440	274960	332500	353240	182700	183910	336980	703660	274380	344710	336326	1.02493	0.92588
sp|P09493|TPM1_HUMAN	TPM1	sp|P09493|TPM1_HUMAN Tropomyosin alpha-1 chain OS=Homo sapiens OX=9606 GN=TPM1 PE=1 SV=2	1	9	5	3	24.6	32.708		76549	216360	206850	96481	89188	225090	127530		29515	150860	132800	265610	148293	144696	1.02485	0.942456
sp|Q92597|NDRG1_HUMAN	NDRG1	sp|Q92597|NDRG1_HUMAN Protein NDRG1 OS=Homo sapiens OX=9606 GN=NDRG1 PE=1 SV=1	1	5	5	5	19.3	42.835		54760	33898	44889	198420	58253	40964	89843			49364	115360	53246	74432.4	72656.7	1.02444	0.962603
sp|P63104|1433Z_HUMAN	YWHAZ	sp|P63104|1433Z_HUMAN 14-3-3 protein zeta/delta OS=Homo sapiens OX=9606 GN=YWHAZ PE=1 SV=1	1	10	7	7	44.5	27.745	326190	521550	604170	900840	512550	611110	495240	601970	356780	220070	543200	1213200	481950	571702	563040	1.01539	0.955342
sp|P05023|AT1A1_HUMAN;sp|P50993|AT1A2_HUMAN;sp|P13637|AT1A3_HUMAN;sp|Q13733|AT1A4_HUMAN;sp|P20648|ATP4A_HUMAN;sp|P54707|AT12A_HUMAN	ATP1A1	sp|P05023|AT1A1_HUMAN Sodium/potassium-transporting ATPase subunit alpha-1 OS=Homo sapiens OX=9606 GN=ATP1A1 PE=1 SV=1;sp|P50993|AT1A2_HUMAN Sodium/potassium-transporting ATPase subunit alpha-2 OS=Homo sapiens OX=9606 GN=ATP1A2 PE=1 SV=1;sp|P13637|AT1A3_HU	6	10	10	10	13.3	112.89		79458	57433	150990			102280			51347	95693	192610	45251	97540.2	96225.2	1.01367	0.974519
sp|P18206|VINC_HUMAN	VCL	sp|P18206|VINC_HUMAN Vinculin OS=Homo sapiens OX=9606 GN=VCL PE=1 SV=4	1	20	20	20	22.9	123.8		203160	266590	411900	59503	128800	353320	294630	29310	96201	239160	650690	199240	245415	242920	1.01027	0.981683
sp|P01876|IGHA1_HUMAN	IGHA1	sp|P01876|IGHA1_HUMAN Immunoglobulin heavy constant alpha 1 OS=Homo sapiens OX=9606 GN=IGHA1 PE=1 SV=2	1	9	9	7	32.9	37.654	20214000	13368000	11681000	9962600	7059200	31460000	21497000	18970000	11076000	22260000	20548000	6959900	22280000	16776475	16624780	1.00912	0.972717
sp|A0A0A0MS15|HV349_HUMAN;sp|A0A0B4J1V6|HV373_HUMAN	IGHV3-49	sp|A0A0A0MS15|HV349_HUMAN Immunoglobulin heavy variable 3-49 OS=Homo sapiens OX=9606 GN=IGHV3-49 PE=3 SV=1	2	3	3	3	27.7	13.056		140580	81480	171350			76949	217540		111690	115080	101870	217060	137580	136425	1.00846	0.976945
sp|P53396|ACLY_HUMAN	ACLY	sp|P53396|ACLY_HUMAN ATP-citrate synthase OS=Homo sapiens OX=9606 GN=ACLY PE=1 SV=3	1	7	7	7	7.8	120.84		64622	66312	39082			48047			33750	60347	68299		54515.8	54132	1.00709	0.975133
sp|P02790|HEMO_HUMAN	HPX	sp|P02790|HEMO_HUMAN Hemopexin OS=Homo sapiens OX=9606 GN=HPX PE=1 SV=2	1	15	15	15	42	51.676	20110000	10971000	17979000	17453000	9393100	17279000	19437000	20910000	20786000	23253000	11857000	9157000	17827000	1.66915e+07	16576000	1.00697	0.967918
sp|P04075|ALDOA_HUMAN	ALDOA	sp|P04075|ALDOA_HUMAN Fructose-bisphosphate aldolase A OS=Homo sapiens OX=9606 GN=ALDOA PE=1 SV=2	1	14	14	14	46.4	39.42	1248100	1050500	1188100	1778000	1159300	1152200	1178500	920040	594570	1869300	1271300	1510200	778680	1.20934e+06	1204810	1.00376	0.983396
sp|P62805|H4_HUMAN	H4C1	sp|P62805|H4_HUMAN Histone H4 OS=Homo sapiens OX=9606 GN=H4C1 PE=1 SV=2	1	5	5	5	50.5	11.367	288290	334920	135850	254960	472290	368670	300140	475860	167010	251290	392390	341940	494300	328872	329386	0.998441	0.994039
sp|P16157|ANK1_HUMAN;sp|Q01484|ANK2_HUMAN;sp|Q12955|ANK3_HUMAN	ANK1	sp|P16157|ANK1_HUMAN Ankyrin-1 OS=Homo sapiens OX=9606 GN=ANK1 PE=1 SV=3	3	50	50	50	34.7	206.26	1666300	2001200	3543200	949030	1181500	450880	1838700	2016100	134110	2600700	2282100	3141300	428290	1.70586e+06	1717300	0.993341	0.985769
sp|P02655|APOC2_HUMAN	APOC2	sp|P02655|APOC2_HUMAN Apolipoprotein C-II OS=Homo sapiens OX=9606 GN=APOC2 PE=1 SV=1	1	2	2	2	17.8	11.284		167230	152530	53123			82817	151510	81822		107950	154890	147850	121442	123128	0.986307	0.956256
sp|P06748|NPM_HUMAN	NPM1	sp|P06748|NPM_HUMAN Nucleophosmin OS=Homo sapiens OX=9606 GN=NPM1 PE=1 SV=2	1	1	1	1	4.4	32.575		43443		72848	115920			57336			45797	77996	97137	72386.8	73643.3	0.982937	0.957462
sp|P27797|CALR_HUMAN	CALR	sp|P27797|CALR_HUMAN Calreticulin OS=Homo sapiens OX=9606 GN=CALR PE=1 SV=1	1	6	6	6	19.7	48.141		163830	118820	252870	128650	121930	151580	140250		53502	124240	326910	123310	153990	156990	0.980887	0.952407
sp|Q16658|FSCN1_HUMAN	FSCN1	sp|Q16658|FSCN1_HUMAN Fascin OS=Homo sapiens OX=9606 GN=FSCN1 PE=1 SV=3	1	11	11	11	24.5	54.529	378170	234050	214420	431010	138320	242160	203470	136080	125560	301300	196990	476660	163040	247210	252710	0.978236	0.937317
sp|P30086|PEBP1_HUMAN	PEBP1	sp|P30086|PEBP1_HUMAN Phosphatidylethanolamine-binding protein 1 OS=Homo sapiens OX=9606 GN=PEBP1 PE=1 SV=3	1	10	10	10	62	21.057	1361400	998000	542810	537560	1816300	716820	885980	626480	454540	681980	757250	1854800	1058000	935669	961314	0.973323	0.927991
sp|P07451|CAH3_HUMAN	CA3	sp|P07451|CAH3_HUMAN Carbonic anhydrase 3 OS=Homo sapiens OX=9606 GN=CA3 PE=1 SV=3	1	5	5	5	24.2	29.557	284220	178110	493840	161230		145210	341190	222790	192690	260840	182930	500450	205080	260941	268398	0.972218	0.922714
sp|P62937|PPIA_HUMAN;sp|Q9Y536|PAL4A_HUMAN;sp|P0DN26|PAL4F_HUMAN;sp|F5H284|PAL4D_HUMAN;sp|A0A0B4J2A2|PAL4C_HUMAN;sp|A0A075B767|PAL4H_HUMAN;sp|A0A075B759|PAL4E_HUMAN	PPIA	sp|P62937|PPIA_HUMAN Peptidyl-prolyl cis-trans isomerase A OS=Homo sapiens OX=9606 GN=PPIA PE=1 SV=2	7	5	5	5	30.9	18.012	2237700	805660	997420	759640	654050	741930	926570	1185000	538080	1402800	997640	2040500	381490	1.0385e+06	1072102	0.968654	0.920401
sp|P50502|F10A1_HUMAN;sp|Q8NFI4|F10A5_HUMAN;sp|Q8IZP2|ST134_HUMAN	ST13	sp|P50502|F10A1_HUMAN Hsc70-interacting protein OS=Homo sapiens OX=9606 GN=ST13 PE=1 SV=2;sp|Q8NFI4|F10A5_HUMAN Putative protein FAM10A5 OS=Homo sapiens OX=9606 GN=ST13P5 PE=5 SV=1;sp|Q8IZP2|ST134_HUMAN Putative protein FAM10A4 OS=Homo sapiens OX=9606 GN=S	3	5	5	5	16.5	41.331		65575	183740	218460	377030	107870	130250	170680		70943	207480	282220	179460	179086	185026	0.9679	0.924088
sp|Q13228|SBP1_HUMAN	SELENBP1	sp|Q13228|SBP1_HUMAN Methanethiol oxidase OS=Homo sapiens OX=9606 GN=SELENBP1 PE=1 SV=2	1	18	18	18	48.9	52.39	2653200	1409400	3840700	1367600	557180	881710	1579100	1656300	349640	2481500	1858600	3806200	545940	1.74315e+06	1808376	0.96393	0.925735
sp|P09936|UCHL1_HUMAN	UCHL1	sp|P09936|UCHL1_HUMAN Ubiquitin carboxyl-terminal hydrolase isozyme L1 OS=Homo sapiens OX=9606 GN=UCHL1 PE=1 SV=2	1	7	7	7	43.9	24.824	100230	148170	80790	488270		206000	125800	149850		71535	177390	428630	94105	185587	192915	0.962015	0.938721
sp|P20810|ICAL_HUMAN	CAST	sp|P20810|ICAL_HUMAN Calpastatin OS=Homo sapiens OX=9606 GN=CAST PE=1 SV=4	1	6	6	6	12	76.572		141940	241020	243580			192930	224470			187710	269230	196800	208788	217913	0.958124	0.782217
sp|A2NJV5|KV229_HUMAN;sp|A0A075B6S2|KVD29_HUMAN;sp|P06310|KV230_HUMAN;sp|A0A0A0MRZ7|KVD26_HUMAN;sp|A0A075B6S6|KVD30_HUMAN	IGKV2-29	sp|A2NJV5|KV229_HUMAN Immunoglobulin kappa variable 2-29 OS=Homo sapiens OX=9606 GN=IGKV2-29 PE=3 SV=2;sp|A0A075B6S2|KVD29_HUMAN Immunoglobulin kappa variable 2D-29 OS=Homo sapiens OX=9606 GN=IGKV2D-29 PE=3 SV=1	5	3	3	2	32.5	13.085		3720400	2208500	1735500	1199600	5249700	3111200	3265100	3212500	7414200	2553000	275590	1860900	2.92714e+06	3063238	0.955571	0.909244
sp|P13489|RINI_HUMAN	RNH1	sp|P13489|RINI_HUMAN Ribonuclease inhibitor OS=Homo sapiens OX=9606 GN=RNH1 PE=1 SV=2	1	9	9	9	32.1	49.973	154830	227550	295520	272320	614040	102200	210150	233180	285230	146890	235370	559770	160380	263724	277528	0.95026	0.881938
sp|Q08495|DEMA_HUMAN	DMTN	sp|Q08495|DEMA_HUMAN Dematin OS=Homo sapiens OX=9606 GN=DMTN PE=1 SV=3	1	6	6	6	19	45.514	182160	142720	249430	113190	322220		162670	102290		415570	205290	61172	85717	182097	191937	0.948733	0.892962
sp|P19652|A1AG2_HUMAN	ORM2	sp|P19652|A1AG2_HUMAN Alpha-1-acid glycoprotein 2 OS=Homo sapiens OX=9606 GN=ORM2 PE=1 SV=2	1	7	4	4	35.3	23.602	1558900	1427700	1776500	924100	1070400	654240	3770100	1293500	3372700	1062800	1253900	1109600	1455100	1559430	1650820	0.94464	0.871325
sp|P06454|PTMA_HUMAN	PTMA	sp|P06454|PTMA_HUMAN Prothymosin alpha OS=Homo sapiens OX=9606 GN=PTMA PE=1 SV=2	1	3	3	3	25.2	12.203		138440	93294	185540	529700	160480	95184	96928		58117	115690	237320	379170	185652	197574	0.939658	0.902838
sp|O75369|FLNB_HUMAN	FLNB	sp|O75369|FLNB_HUMAN Filamin-B OS=Homo sapiens OX=9606 GN=FLNB PE=1 SV=2	1	28	28	26	15.4	278.16		134870	138600	185180			200120	81954		35507	122200	438810	40335	148145	159213	0.930482	0.902327
sp|Q96C23|GALM_HUMAN	GALM	sp|Q96C23|GALM_HUMAN Aldose 1-epimerase OS=Homo sapiens OX=9606 GN=GALM PE=1 SV=1	1	4	4	4	13.5	37.765		31343		90106		40152	33857			28533	44090	85250		48864.5	52624.3	0.928553	0.869087
sp|Q5T749|KPRP_HUMAN	KPRP	sp|Q5T749|KPRP_HUMAN Keratinocyte proline-rich protein OS=Homo sapiens OX=9606 GN=KPRP PE=1 SV=1	1	9	9	9	16.9	64.135	214580	32548	134440	605280	1595700	1028400	106130	270500	369530	1059100	191520	190350	886840	498447	539468	0.923961	0.889066
sp|O95865|DDAH2_HUMAN	DDAH2	sp|O95865|DDAH2_HUMAN N(G),N(G)-dimethylarginine dimethylaminohydrolase 2 OS=Homo sapiens OX=9606 GN=DDAH2 PE=1 SV=1	1	5	5	5	23.2	29.644		80500	47474	110660	137260	129390	91070	76131		71411	49783	218620	76451	96069.3	104066	0.923155	0.810182
sp|P61981|1433G_HUMAN	YWHAG	sp|P61981|1433G_HUMAN 14-3-3 protein gamma OS=Homo sapiens OX=9606 GN=YWHAG PE=1 SV=2	1	6	3	3	24.7	28.302	68431	82950	113070	157000	100340	103820	111110	106080		55850	107680	197410	96908	105350	114462	0.920394	0.711807
sp|P06733|ENOA_HUMAN	ENO1	sp|P06733|ENOA_HUMAN Alpha-enolase OS=Homo sapiens OX=9606 GN=ENO1 PE=1 SV=2	1	13	13	12	33.6	47.168	1167400	994350	903530	1583500	937290	691170	929800	839320	357110	1051400	767970	2494100	800610	1005795	1094238	0.919174	0.779143
sp|P11021|BIP_HUMAN	HSPA5	sp|P11021|BIP_HUMAN Endoplasmic reticulum chaperone BiP OS=Homo sapiens OX=9606 GN=HSPA5 PE=1 SV=2	1	16	15	15	31.7	72.332		401810	180220	418520		124050	322890	327250		138390	255370	653540	242010	295790	322328	0.917669	0.812658
sp|A0A0J9YX35|HV64D_HUMAN	IGHV3-64D	sp|A0A0J9YX35|HV64D_HUMAN Immunoglobulin heavy variable 3-64D OS=Homo sapiens OX=9606 GN=IGHV3-64D PE=3 SV=1	1	2	2	2	18.8	12.822		259430	167420	96002			275120	99642		176460	272730	142810		179523	197333	0.909744	0.769968
sp|P02794|FRIH_HUMAN	FTH1	sp|P02794|FRIH_HUMAN Ferritin heavy chain OS=Homo sapiens OX=9606 GN=FTH1 PE=1 SV=2	1	8	8	8	50.3	21.225	792620	408720	663100	642010	249530	61855	689890	221860	126670		299070	882280	743530	466198	512888	0.908968	0.80284
sp|P25788|PSA3_HUMAN	PSMA3	sp|P25788|PSA3_HUMAN Proteasome subunit alpha type-3 OS=Homo sapiens OX=9606 GN=PSMA3 PE=1 SV=2	1	6	6	6	22.4	28.433		84573	103470	112040		64833	96694		72354	86872	86526	160820		92322	101643	0.908297	0.653589
sp|P14923|PLAK_HUMAN	JUP	sp|P14923|PLAK_HUMAN Junction plakoglobin OS=Homo sapiens OX=9606 GN=JUP PE=1 SV=3	1	6	6	6	9.7	81.744	62718		41742	170840	1710200	248780	19985	30421	202300	375200	35343	11399	1173400	326384	359528	0.907811	0.922159
sp|P06576|ATPB_HUMAN	ATP5F1B	sp|P06576|ATPB_HUMAN ATP synthase subunit beta, mitochondrial OS=Homo sapiens OX=9606 GN=ATP5F1B PE=1 SV=3	1	11	11	11	28.7	56.559	86111	97264	82445	214700		69426	140380	208400		63107	143890	231450	127370	128389	141454	0.907639	0.751833
sp|Q08188|TGM3_HUMAN	TGM3	sp|Q08188|TGM3_HUMAN Protein-glutamine gamma-glutamyltransferase E OS=Homo sapiens OX=9606 GN=TGM3 PE=1 SV=4	1	6	6	6	9.8	76.631			30817	17201	331330	107540	33710	48961	36252	138140	16542	28794	303360	94926.5	104618	0.907366	0.89733
sp|P67936|TPM4_HUMAN	TPM4	sp|P67936|TPM4_HUMAN Tropomyosin alpha-4 chain OS=Homo sapiens OX=9606 GN=TPM4 PE=1 SV=3	1	11	11	6	31.9	28.521	363240	342700	591330	845770	481740	604520	923400	508560		185400	440870	586960	1359300	582658	643132	0.905968	0.769303
sp|P11277|SPTB1_HUMAN	SPTB	sp|P11277|SPTB1_HUMAN Spectrin beta chain, erythrocytic OS=Homo sapiens OX=9606 GN=SPTB PE=1 SV=5	1	74	74	71	39.1	246.47	3003400	2542400	3951400	1691800	2622200	1032500	2103300	2510700	951940	4053700	3538300	3923800	1030900	2.43221e+06	2699728	0.90091	0.697192
sp|Q9BS40|LXN_HUMAN	LXN	sp|Q9BS40|LXN_HUMAN Latexin OS=Homo sapiens OX=9606 GN=LXN PE=1 SV=2	1	3	3	3	16.7	25.75		155450	138540	62534		64695	251470	99234		56340	106220	267250		128654	143270	0.897982	0.812935
sp|P60174|TPIS_HUMAN	TPI1	sp|P60174|TPIS_HUMAN Triosephosphate isomerase OS=Homo sapiens OX=9606 GN=TPI1 PE=1 SV=3	1	14	14	14	52.8	30.791	4152700	1644000	1820100	2317800	1930700	2583000	1867400	1773400	1226700	4150200	1670500	3834300	1736900	2.26114e+06	2523720	0.895954	0.669739
sp|P02743|SAMP_HUMAN	APCS	sp|P02743|SAMP_HUMAN Serum amyloid P-component OS=Homo sapiens OX=9606 GN=APCS PE=1 SV=2	1	6	6	6	30.5	25.387	264100	376170	961890	280570	206420	423260	451270	549980	156810	521630	685120	442740	648210	439208	490902	0.894695	0.699784
sp|P0DMV9|HS71B_HUMAN;sp|P0DMV8|HS71A_HUMAN	HSPA1B	sp|P0DMV9|HS71B_HUMAN Heat shock 70 kDa protein 1B OS=Homo sapiens OX=9606 GN=HSPA1B PE=1 SV=1;sp|P0DMV8|HS71A_HUMAN Heat shock 70 kDa protein 1A OS=Homo sapiens OX=9606 GN=HSPA1A PE=1 SV=1	2	18	18	9	30.1	70.051	634080	859140	739170	1276900	579660	518780	934830	987950	217770	783890	935730	2045100	582020	816314	912902	0.894196	0.719928
sp|P78417|GSTO1_HUMAN	GSTO1	sp|P78417|GSTO1_HUMAN Glutathione S-transferase omega-1 OS=Homo sapiens OX=9606 GN=GSTO1 PE=1 SV=2	1	11	11	11	40.2	27.566	995940	557330	821040	628720	484900	336210	591500	754000	232140	1501500	460910	1157600	263170	646205	723064	0.893704	0.731502
sp|Q9Y490|TLN1_HUMAN	TLN1	sp|Q9Y490|TLN1_HUMAN Talin-1 OS=Homo sapiens OX=9606 GN=TLN1 PE=1 SV=3	1	18	18	18	10.2	269.76		74767	105310	104000		79136	136950	121780		21486	88503	302450	51559	103657	116000	0.8936	0.817597
sp|P07195|LDHB_HUMAN;sp|Q6ZMR3|LDH6A_HUMAN;sp|P07864|LDHC_HUMAN	LDHB	sp|P07195|LDHB_HUMAN L-lactate dehydrogenase B chain OS=Homo sapiens OX=9606 GN=LDHB PE=1 SV=2	3	10	10	9	34.7	36.638	1091400	1282000	1634200	1642800	417960	398420	1328900	961390	511810	1076500	1443100	2552400	556630	1.09463e+06	1228088	0.891332	0.719185
sp|P15121|ALDR_HUMAN;sp|C9JRZ8|AK1BF_HUMAN	AKR1B1	sp|P15121|ALDR_HUMAN Aldo-keto reductase family 1 member B1 OS=Homo sapiens OX=9606 GN=AKR1B1 PE=1 SV=3	2	4	4	4	14.2	35.853	93788	56027	34067	67296	166730	89066	57683	31017		45930	55273	149420		74459.2	83541	0.89129	0.781596
sp|P08758|ANXA5_HUMAN	ANXA5	sp|P08758|ANXA5_HUMAN Annexin A5 OS=Homo sapiens OX=9606 GN=ANXA5 PE=1 SV=2	1	6	6	6	17.8	35.936	300690	254180	179860	518270	164490	184460	357270	578120	137940		356210	772900	160610	317168	356915	0.888636	0.761687
sp|P00441|SODC_HUMAN	SOD1	sp|P00441|SODC_HUMAN Superoxide dismutase [Cu-Zn] OS=Homo sapiens OX=9606 GN=SOD1 PE=1 SV=2	1	3	3	3	23.4	15.936	1190500	785440	1078600	1050300	367870	849460	1055200	1099800		1199800	964280	1574800	468480	934646	1051840	0.888582	0.582605
sp|P30101|PDIA3_HUMAN	PDIA3	sp|P30101|PDIA3_HUMAN Protein disulfide-isomerase A3 OS=Homo sapiens OX=9606 GN=PDIA3 PE=1 SV=4	1	12	12	12	28.7	56.782	195080	267480	233500	536610	377280	153230	321130	298370		56425	281820	774570	228100	297835	335229	0.888453	0.762175
sp|P01742|HV169_HUMAN	IGHV1-69	sp|P01742|HV169_HUMAN Immunoglobulin heavy variable 1-69 OS=Homo sapiens OX=9606 GN=IGHV1-69 PE=1 SV=2	1	2	2	1	20.5	12.659		1436300	184090	160560			307660	988000		625180	646080	807110		615322	692790	0.88818	0.828595
sp|P35611|ADDA_HUMAN	ADD1	sp|P35611|ADDA_HUMAN Alpha-adducin OS=Homo sapiens OX=9606 GN=ADD1 PE=1 SV=2	1	9	9	9	16.8	80.954		110780	163980	91976			109920	79864		101970	145270	193780	60820	111304	125460	0.887167	0.650563
sp|Q05682|CALD1_HUMAN	CALD1	sp|Q05682|CALD1_HUMAN Caldesmon OS=Homo sapiens OX=9606 GN=CALD1 PE=1 SV=3	1	10	10	10	15.5	93.23		46006	168750	85552	44759	64187	206300	75096			74296	45061	214360	98664.3	111239	0.886958	0.804259
sp|Q04756|HGFA_HUMAN;CON__ENSEMBL:ENSBTAP00000023055	HGFAC	sp|Q04756|HGFA_HUMAN Hepatocyte growth factor activator OS=Homo sapiens OX=9606 GN=HGFAC PE=1 SV=1	2	3	3	3	7	70.681		37944	40094			20100	46923	35294		42259		26909	53061	36071	40743	0.88533	0.585163
sp|P07900|HS90A_HUMAN;sp|Q14568|HS902_HUMAN;sp|Q58FG0|HS905_HUMAN	HSP90AA1	sp|P07900|HS90A_HUMAN Heat shock protein HSP 90-alpha OS=Homo sapiens OX=9606 GN=HSP90AA1 PE=1 SV=5	3	17	17	9	25.3	84.659	474530	479390	478800	1146300	1077900	623270	545320	451950	261110	290980	631630	1672200	874830	659682	746150	0.884115	0.721962
sp|P02549|SPTA1_HUMAN	SPTA1	sp|P02549|SPTA1_HUMAN Spectrin alpha chain, erythrocytic 1 OS=Homo sapiens OX=9606 GN=SPTA1 PE=1 SV=5	1	83	83	83	39.6	280.01	5305300	3498300	6251700	2495200	4800500	1810000	3529800	4313000	1600400	7815200	5287100	6449500	1610800	4000475	4552600	0.878723	0.649231
sp|P00338|LDHA_HUMAN	LDHA	sp|P00338|LDHA_HUMAN L-lactate dehydrogenase A chain OS=Homo sapiens OX=9606 GN=LDHA PE=1 SV=2	1	9	8	8	27.4	36.688	179600	359000	181560	195170	129360		434800	113160		101010	332780	502920	100770	227521	259370	0.877208	0.743088
sp|P60891|PRPS1_HUMAN;sp|P11908|PRPS2_HUMAN;sp|P21108|PRPS3_HUMAN	PRPS1	sp|P60891|PRPS1_HUMAN Ribose-phosphate pyrophosphokinase 1 OS=Homo sapiens OX=9606 GN=PRPS1 PE=1 SV=2	3	5	5	5	24.8	34.834		89102	25066				58883	29436		60074	65925	47300		50621.8	57766.3	0.876319	0.710492
sp|P11171|41_HUMAN	EPB41	sp|P11171|41_HUMAN Protein 4.1 OS=Homo sapiens OX=9606 GN=EPB41 PE=1 SV=4	1	18	18	16	24.3	97.016	815970	604680	810740	316780	649340	167330	553170	680990	224360	1006900	925080	781650	352960	574875	658190	0.873418	0.61035
sp|P62987|RL40_HUMAN;sp|P62979|RS27A_HUMAN;sp|P0CG47|UBB_HUMAN;sp|P0CG48|UBC_HUMAN	UBA52	sp|P62987|RL40_HUMAN Ubiquitin-60S ribosomal protein L40 OS=Homo sapiens OX=9606 GN=UBA52 PE=1 SV=2;sp|P62979|RS27A_HUMAN Ubiquitin-40S ribosomal protein S27a OS=Homo sapiens OX=9606 GN=RPS27A PE=1 SV=2;sp|P0CG47|UBB_HUMAN Polyubiquitin-B OS=Homo sapiens O	4	3	3	3	26.6	14.728	926010	133300	122180	278270	1542300	1023600	152110	241960			145700	762780	998160	552466	635547	0.869277	0.81828
sp|P62258|1433E_HUMAN	YWHAE	sp|P62258|1433E_HUMAN 14-3-3 protein epsilon OS=Homo sapiens OX=9606 GN=YWHAE PE=1 SV=1	1	15	15	13	60.4	29.174	637420	877020	988920	1159300	603930	828740	827410	910880	600040	520660	1026300	1983500	816570	854202	989414	0.863342	0.548742
sp|P48637|GSHB_HUMAN	GSS	sp|P48637|GSHB_HUMAN Glutathione synthetase OS=Homo sapiens OX=9606 GN=GSS PE=1 SV=1	1	4	4	4	7.4	52.384		32255	38795	52180			29301	39815		51488	35825	58245	33272	38469.2	44707.5	0.860464	0.399252
sp|P04004|VTNC_HUMAN;CON__Q3ZBS7	VTN	sp|P04004|VTNC_HUMAN Vitronectin OS=Homo sapiens OX=9606 GN=VTN PE=1 SV=1	2	12	12	12	31.4	54.305	499550	1085000	1116300	1418300	894950	1086100	679670	1175600	660860	603030	1264500	1641400	1716700	994434	1177298	0.844675	0.432932
sp|P60660|MYL6_HUMAN;sp|P14649|MYL6B_HUMAN	MYL6	sp|P60660|MYL6_HUMAN Myosin light polypeptide 6 OS=Homo sapiens OX=9606 GN=MYL6 PE=1 SV=2	2	6	6	6	37.1	16.93	180340	239070	183500	478560	290040	239150	261070	277390		94948	232480	600300	345480	268640	318302	0.843978	0.578036
sp|Q01995|TAGL_HUMAN	TAGLN	sp|Q01995|TAGL_HUMAN Transgelin OS=Homo sapiens OX=9606 GN=TAGLN PE=1 SV=4	1	8	8	8	39.8	22.611		114450	53600	147640	151160	141970	283400	157390		126740	200110	235270	149870	149944	177998	0.842395	0.495106
sp|Q14894|CRYM_HUMAN	CRYM	sp|Q14894|CRYM_HUMAN Ketimine reductase mu-crystallin OS=Homo sapiens OX=9606 GN=CRYM PE=1 SV=1	1	10	10	10	37.9	33.775	457270	838810	211890	1116800	1004800	156390	337370	84635	531330		427680	1221700	319770	525996	625120	0.841431	0.698075
sp|Q96FW1|OTUB1_HUMAN	OTUB1	sp|Q96FW1|OTUB1_HUMAN Ubiquitin thioesterase OTUB1 OS=Homo sapiens OX=9606 GN=OTUB1 PE=1 SV=2	1	3	3	3	14.4	31.284		26635	31345	43011			24043	25940			27610	61685	18438	30194.8	35911	0.840823	0.61031
sp|P30041|PRDX6_HUMAN	PRDX6	sp|P30041|PRDX6_HUMAN Peroxiredoxin-6 OS=Homo sapiens OX=9606 GN=PRDX6 PE=1 SV=3	1	11	11	11	53.1	25.035	1227700	1309000	1536300	805130	509860	446980	1426500	1258200	505270	2033500	1196000	2123400	484260	1.06496e+06	1268486	0.839551	0.553467
sp|P02652|APOA2_HUMAN	APOA2	sp|P02652|APOA2_HUMAN Apolipoprotein A-II OS=Homo sapiens OX=9606 GN=APOA2 PE=1 SV=1	1	4	4	4	21	11.175	2252400	4807700	9380900	7096400	2174100	3402300	10105000	7233900	8405300	5694900	5475600	6098100	8928900	5.80659e+06	6920560	0.839034	0.478589
sp|P51884|LUM_HUMAN;CON__Q05443	LUM	sp|P51884|LUM_HUMAN Lumican OS=Homo sapiens OX=9606 GN=LUM PE=1 SV=2	2	8	8	8	19.5	38.429	1166000	865030	1783000	3611700	420350	2026400	2135000	1084600	1220600	345810	1457600	1590300	5173700	1636510	1957602	0.835977	0.689917
sp|P12814|ACTN1_HUMAN;sp|P35609|ACTN2_HUMAN;sp|Q08043|ACTN3_HUMAN	ACTN1	sp|P12814|ACTN1_HUMAN Alpha-actinin-1 OS=Homo sapiens OX=9606 GN=ACTN1 PE=1 SV=2	3	21	12	12	27	103.06		188500	121040	171440		50088	218030	122210		38701	83830	400070		145218	174200	0.833626	0.736072
sp|P06702|S10A9_HUMAN	S100A9	sp|P06702|S10A9_HUMAN Protein S100-A9 OS=Homo sapiens OX=9606 GN=S100A9 PE=1 SV=1	1	5	5	5	51.8	13.242	530330	384690	549670	527470	754690	593810	499030	590170	395480	1060300	251100	1113300	509420	553732	665920	0.83153	0.452272
sp|O75368|SH3L1_HUMAN	SH3BGRL	sp|O75368|SH3L1_HUMAN SH3 domain-binding glutamic acid-rich-like protein OS=Homo sapiens OX=9606 GN=SH3BGRL PE=1 SV=1	1	6	6	6	40.4	12.774	293980	151740	201520	196950	257530	308380	153040	147070		257650	180640	321540	269610	213776	257360	0.830651	0.286009
sp|P52907|CAZA1_HUMAN	CAPZA1	sp|P52907|CAZA1_HUMAN F-actin-capping protein subunit alpha-1 OS=Homo sapiens OX=9606 GN=CAPZA1 PE=1 SV=3	1	5	5	3	27.3	32.922		79869	53577	70851			59360	60191		35949	51352	195200	32230	64769.6	78682.8	0.823174	0.700541
sp|P00568|KAD1_HUMAN	AK1	sp|P00568|KAD1_HUMAN Adenylate kinase isoenzyme 1 OS=Homo sapiens OX=9606 GN=AK1 PE=1 SV=3	1	5	5	5	28.9	21.635		431410	49376	72196	342980	115530	269830	193260		293490	362420	252260	116670	210655	256210	0.822195	0.594857
sp|P15374|UCHL3_HUMAN	UCHL3	sp|P15374|UCHL3_HUMAN Ubiquitin carboxyl-terminal hydrolase isozyme L3 OS=Homo sapiens OX=9606 GN=UCHL3 PE=1 SV=1	1	5	5	5	33	26.182		45416	50474	33629		34408	42372	34648		25218	31749	90708		40157.8	49225	0.815802	0.545147
sp|Q13642|FHL1_HUMAN	FHL1	sp|Q13642|FHL1_HUMAN Four and a half LIM domains protein 1 OS=Homo sapiens OX=9606 GN=FHL1 PE=1 SV=4	1	6	6	6	22.3	36.263		105140	105120	246460	188000		699300	96219			271850	258560	353030	240040	294480	0.815131	0.709729
sp|O75874|IDHC_HUMAN	IDH1	sp|O75874|IDHC_HUMAN Isocitrate dehydrogenase [NADP] cytoplasmic OS=Homo sapiens OX=9606 GN=IDH1 PE=1 SV=2	1	6	6	6	18.1	46.659	54165	98751	78083	184020	181880	92162	87096	57140		84707	80315	208640	139700	104162	128340	0.811608	0.480724
sp|P14625|ENPL_HUMAN;sp|Q58FF3|ENPLL_HUMAN	HSP90B1	sp|P14625|ENPL_HUMAN Endoplasmin OS=Homo sapiens OX=9606 GN=HSP90B1 PE=1 SV=1	2	12	11	11	17.4	92.468		142080	84020	217170		63260	102250	125290			111010	237830	104940	122345	151260	0.808839	0.523862
sp|P22626|ROA2_HUMAN	HNRNPA2B1	sp|P22626|ROA2_HUMAN Heterogeneous nuclear ribonucleoproteins A2/B1 OS=Homo sapiens OX=9606 GN=HNRNPA2B1 PE=1 SV=2	1	5	5	5	17	37.429		132600	54366	74548	138560	44674	169930	132140			127180	118450	150550	106688	132060	0.807877	0.412969
sp|P40121|CAPG_HUMAN	CAPG	sp|P40121|CAPG_HUMAN Macrophage-capping protein OS=Homo sapiens OX=9606 GN=CAPG PE=1 SV=2	1	4	4	4	14.1	38.498		107650	23235	85696	152730	43355	63998	75459			66733	142130	85071	78874.7	97978	0.805025	0.526894
sp|P68871|HBB_HUMAN	HBB	sp|P68871|HBB_HUMAN Hemoglobin subunit beta OS=Homo sapiens OX=9606 GN=HBB PE=1 SV=2	1	18	18	9	97.3	15.998	601030000	408700000	604830000	266090000	242860000	229090000	383330000	492160000	229320000	750780000	534030000	765000000	227380000	403511250	501302000	0.804926	0.411829
sp|P05783|K1C18_HUMAN;CON__P05784;CON__H-INV:HIT000015463	KRT18	sp|P05783|K1C18_HUMAN Keratin, type I cytoskeletal 18 OS=Homo sapiens OX=9606 GN=KRT18 PE=1 SV=2	3	10	9	9	25.1	48.057		122980	56777	151390	113880		59736	129360			115180	130710	148360	105687	131417	0.804214	0.319429
sp|P68363|TBA1B_HUMAN	TUBA1B	sp|P68363|TBA1B_HUMAN Tubulin alpha-1B chain OS=Homo sapiens OX=9606 GN=TUBA1B PE=1 SV=1	1	13	13	0	37.7	50.151	100220	1018800	311450	801390		170430	568870	287550			483420	1054900	203290	465530	580537	0.801896	0.662508
sp|P02763|A1AG1_HUMAN	ORM1	sp|P02763|A1AG1_HUMAN Alpha-1-acid glycoprotein 1 OS=Homo sapiens OX=9606 GN=ORM1 PE=1 SV=1	1	8	8	5	44.8	23.511	12165000	9021600	24122000	11631000	11402000	4126000	14576000	16483000	28817000	11433000	11336000	7499900	21770000	12940825	16171180	0.80024	0.440004
sp|P02511|CRYAB_HUMAN	CRYAB	sp|P02511|CRYAB_HUMAN Alpha-crystallin B chain OS=Homo sapiens OX=9606 GN=CRYAB PE=1 SV=2	1	6	6	6	36	20.159		296340	68863	772920	418620	55307	48781	365970		18875	283020	855080	292380	289543	362339	0.799095	0.704116
sp|Q9NVA2|SEP11_HUMAN	SEPTIN11	sp|Q9NVA2|SEP11_HUMAN Septin-11 OS=Homo sapiens OX=9606 GN=SEPTIN11 PE=1 SV=3	1	4	4	4	12.6	49.398		32448	15360	50610		19411	21633				17850	57189	29916	27892.4	34985	0.797267	0.575755
sp|P17931|LEG3_HUMAN	LGALS3	sp|P17931|LEG3_HUMAN Galectin-3 OS=Homo sapiens OX=9606 GN=LGALS3 PE=1 SV=5	1	4	4	4	20.4	26.152		138370	34018	85270		26601	113010	81812		17784	111550	174480		79846.8	101271	0.788445	0.605067
sp|P68036|UB2L3_HUMAN;sp|A0A1B0GUS4|UB2L5_HUMAN	UBE2L3	sp|P68036|UB2L3_HUMAN Ubiquitin-conjugating enzyme E2 L3 OS=Homo sapiens OX=9606 GN=UBE2L3 PE=1 SV=1;sp|A0A1B0GUS4|UB2L5_HUMAN Ubiquitin-conjugating enzyme E2 L5 OS=Homo sapiens OX=9606 GN=UBE2L5 PE=2 SV=1	2	3	3	3	20.8	17.861		65781		18652	43605		41281	45189		51979	54271	73882	37624	42901.6	54439	0.788067	0.317391
sp|P02649|APOE_HUMAN;CON__Q03247	APOE	sp|P02649|APOE_HUMAN Apolipoprotein E OS=Homo sapiens OX=9606 GN=APOE PE=1 SV=1	2	14	14	14	48.9	36.154	1123800	1441700	3032300	1869700	735310	1327800	3436700	1417000	4880900	1185800	2487800	1559100	1502600	1.79804e+06	2323240	0.773936	0.452789
sp|P02730|B3AT_HUMAN	SLC4A1	sp|P02730|B3AT_HUMAN Band 3 anion transport protein OS=Homo sapiens OX=9606 GN=SLC4A1 PE=1 SV=3	1	19	19	19	24.9	101.79	2782100	2753000	4432400	2831000	2768000	1639900	2704700	1436900	1610900	5576400	5560600	3195100	1356000	2668500	3459800	0.771287	0.353175
sp|P26038|MOES_HUMAN	MSN	sp|P26038|MOES_HUMAN Moesin OS=Homo sapiens OX=9606 GN=MSN PE=1 SV=3	1	13	13	9	19.1	67.819	191050	276710	246900	310390	241340	208280	369800	227690		246810	171340	642210	288170	259020	337132	0.768303	0.329677
sp|P00915|CAH1_HUMAN	CA1	sp|P00915|CAH1_HUMAN Carbonic anhydrase 1 OS=Homo sapiens OX=9606 GN=CA1 PE=1 SV=2	1	16	16	16	72	28.87	49272000	22508000	41335000	12960000	20239000	11106000	24313000	26317000	13885000	68159000	30734000	47117000	9514100	26006250	33881820	0.767558	0.459358
sp|P00352|AL1A1_HUMAN;sp|P47895|AL1A3_HUMAN;sp|O94788|AL1A2_HUMAN	ALDH1A1	sp|P00352|AL1A1_HUMAN Retinal dehydrogenase 1 OS=Homo sapiens OX=9606 GN=ALDH1A1 PE=1 SV=2	3	24	24	23	55.5	54.861	711970	2101600	1556500	2706200	523810	276240	951340	742720	205530	314080	1312600	5433000	567560	1.1963e+06	1566554	0.763649	0.6716
sp|P08238|HS90B_HUMAN;sp|Q58FF7|H90B3_HUMAN;sp|Q58FF8|H90B2_HUMAN	HSP90AB1	sp|P08238|HS90B_HUMAN Heat shock protein HSP 90-beta OS=Homo sapiens OX=9606 GN=HSP90AB1 PE=1 SV=4	3	17	9	8	26.9	83.263		211820	159160	156170	180830	159240	135960	92868		52940	209410	418750	139640	156578	205185	0.763108	0.435438
sp|P22061|PIMT_HUMAN	PCMT1	sp|P22061|PIMT_HUMAN Protein-L-isoaspartate(D-aspartate) O-methyltransferase OS=Homo sapiens OX=9606 GN=PCMT1 PE=1 SV=4	1	4	4	4	23.3	24.636		57139			82350		69724	79330		84919	67072	132030		72135.8	94673.7	0.761941	0.255295
sp|P23528|COF1_HUMAN;sp|Q9Y281|COF2_HUMAN	CFL1	sp|P23528|COF1_HUMAN Cofilin-1 OS=Homo sapiens OX=9606 GN=CFL1 PE=1 SV=3	2	7	7	7	45.8	18.502	364730	554200	177130	384900	764580	335490	391970	384580		749470	436010	552250	466930	419698	551165	0.761473	0.219733
sp|P13591|NCAM1_HUMAN	NCAM1	sp|P13591|NCAM1_HUMAN Neural cell adhesion molecule 1 OS=Homo sapiens OX=9606 GN=NCAM1 PE=1 SV=3	1	5	5	5	7.2	94.573		40057	122430	71162			84764	59143			148860	76059	72816	75511.2	99245	0.760856	0.394284
sp|P11142|HSP7C_HUMAN	HSPA8	sp|P11142|HSP7C_HUMAN Heat shock cognate 71 kDa protein OS=Homo sapiens OX=9606 GN=HSPA8 PE=1 SV=1	1	18	17	12	31.3	70.897	463430	954610	880950	852540	371620	309450	962240	796360	109150	1104200	936520	2005200	454530	698900	921920	0.758092	0.438165
sp|P37837|TALDO_HUMAN	TALDO1	sp|P37837|TALDO_HUMAN Transaldolase OS=Homo sapiens OX=9606 GN=TALDO1 PE=1 SV=2	1	11	11	11	34.7	37.54	694350	523350	392840	353290		212720	512370	503570		363350	489050	1359600	199040	456070	602760	0.756636	0.488828
sp|P25705|ATPA_HUMAN	ATP5F1A	sp|P25705|ATPA_HUMAN ATP synthase subunit alpha, mitochondrial OS=Homo sapiens OX=9606 GN=ATP5F1A PE=1 SV=1	1	7	7	7	15.9	59.75		95426		131250			58370	67571			115530	73859	160370	88154.2	116586	0.756129	0.364345
sp|P25786|PSA1_HUMAN	PSMA1	sp|P25786|PSA1_HUMAN Proteasome subunit alpha type-1 OS=Homo sapiens OX=9606 GN=PSMA1 PE=1 SV=1	1	6	6	6	27.4	29.555	151510	109870	133130	115460	100310		101520	103290		107420	121860	234220		116441	154500	0.753666	0.189678
sp|P04632|CPNS1_HUMAN	CAPNS1	sp|P04632|CPNS1_HUMAN Calpain small subunit 1 OS=Homo sapiens OX=9606 GN=CAPNS1 PE=1 SV=1	1	3	3	3	14.2	28.315		111270	84370	96866			92323	101650		54358	95826	237700		97295.8	129295	0.752512	0.464588
sp|Q99497|PARK7_HUMAN	PARK7	sp|Q99497|PARK7_HUMAN Protein/nucleic acid deglycase DJ-1 OS=Homo sapiens OX=9606 GN=PARK7 PE=1 SV=2	1	6	6	6	42.3	19.891	561150	371780	311760	436420	317840	205950	317030	392810	197750	970920	341040	655730	259090	364342	484906	0.751367	0.340961
sp|P00492|HPRT_HUMAN	HPRT1	sp|P00492|HPRT_HUMAN Hypoxanthine-guanine phosphoribosyltransferase OS=Homo sapiens OX=9606 GN=HPRT1 PE=1 SV=2	1	6	6	6	34.4	24.579		112390	122650	72946		65486	127320	96679		153870	96471	214580	65429	99578.5	132588	0.75104	0.290568
sp|P15104|GLNA_HUMAN	GLUL	sp|P15104|GLNA_HUMAN Glutamine synthetase OS=Homo sapiens OX=9606 GN=GLUL PE=1 SV=4	1	5	5	5	17.7	42.064		129660	46229	70846			68018				58623	139460	116680	78688.2	104921	0.749976	0.40996
sp|P27105|STOM_HUMAN	STOM	sp|P27105|STOM_HUMAN Erythrocyte band 7 integral membrane protein OS=Homo sapiens OX=9606 GN=STOM PE=1 SV=3	1	4	4	4	20.5	31.73	93332	212860	321270	129960			226340	71146		101280	447850	158730		175818	235953	0.745139	0.526398
sp|O14818|PSA7_HUMAN;sp|Q8TAA3|PSMA8_HUMAN	PSMA7	sp|O14818|PSA7_HUMAN Proteasome subunit alpha type-7 OS=Homo sapiens OX=9606 GN=PSMA7 PE=1 SV=1;sp|Q8TAA3|PSMA8_HUMAN Proteasome subunit alpha-type 8 OS=Homo sapiens OX=9606 GN=PSMA8 PE=2 SV=3	2	6	6	6	31	27.887		164080	206460	167650			122860	110640		157130	163830	305470		154338	208810	0.739131	0.243141
sp|P54725|RD23A_HUMAN	RAD23A	sp|P54725|RD23A_HUMAN UV excision repair protein RAD23 homolog A OS=Homo sapiens OX=9606 GN=RAD23A PE=1 SV=1	1	5	5	4	15.4	39.609		161190	274290	99598	188690	113490	183080	178970		179800	159220	338550	249830	171330	231850	0.738968	0.178399
sp|P11166|GTR1_HUMAN	SLC2A1	sp|P11166|GTR1_HUMAN Solute carrier family 2, facilitated glucose transporter member 1 OS=Homo sapiens OX=9606 GN=SLC2A1 PE=1 SV=2	1	6	6	6	12	54.083	251570	324410	620750	309800	109470	123850	333180	129930		486180	597040	331220	77587	275370	373007	0.738244	0.414306
sp|P52566|GDIR2_HUMAN	ARHGDIB	sp|P52566|GDIR2_HUMAN Rho GDP-dissociation inhibitor 2 OS=Homo sapiens OX=9606 GN=ARHGDIB PE=1 SV=3	1	5	5	5	26.9	22.988		75964	57795	154690			122080	48794		25412	73196	339190	61788	91864.6	124896	0.735526	0.638913
sp|P04080|CYTB_HUMAN	CSTB	sp|P04080|CYTB_HUMAN Cystatin-B OS=Homo sapiens OX=9606 GN=CSTB PE=1 SV=2	1	4	4	3	70.4	11.139		367500	115930	98864			271450	166820		26169	108430	700580		204113	278393	0.733182	0.676093
sp|P04083|ANXA1_HUMAN	ANXA1	sp|P04083|ANXA1_HUMAN Annexin A1 OS=Homo sapiens OX=9606 GN=ANXA1 PE=1 SV=2	1	8	8	8	27.2	38.714	197190	241600	141550	524530	121030	195010	260870	461860		57383	230140	1007800	168700	267955	366006	0.732106	0.563054
sp|P37840|SYUA_HUMAN	SNCA	sp|P37840|SYUA_HUMAN Alpha-synuclein OS=Homo sapiens OX=9606 GN=SNCA PE=1 SV=1	1	4	4	4	36.4	14.46		329000	89688	73028			243390	309600		158980	215970	482800		208941	285917	0.730777	0.48107
sp|P07738|PMGE_HUMAN	BPGM	sp|P07738|PMGE_HUMAN Bisphosphoglycerate mutase OS=Homo sapiens OX=9606 GN=BPGM PE=1 SV=2	1	10	10	10	47.9	30.005	703770	567320	1201500	414720	430300	281930	779770	670340	148660	1479400	814630	1637500	239200	631206	863878	0.730666	0.405516
sp|P06753|TPM3_HUMAN	TPM3	sp|P06753|TPM3_HUMAN Tropomyosin alpha-3 chain OS=Homo sapiens OX=9606 GN=TPM3 PE=1 SV=2	1	9	6	4	28.1	32.95	268750	165040	338560	308860	383360	255790	377400	279590		315760	246770	418610	652160	297169	408325	0.727775	0.142786
sp|P69905|HBA_HUMAN	HBA1	sp|P69905|HBA_HUMAN Hemoglobin subunit alpha OS=Homo sapiens OX=9606 GN=HBA1 PE=1 SV=2	1	12	12	9	79.6	15.257	237220000	196870000	265130000	140180000	83894000	86568000	184340000	230720000	91122000	431470000	275370000	352330000	74723000	178115250	245003000	0.726992	0.308482
sp|Q01469|FABP5_HUMAN;sp|A8MUU1|FB5L3_HUMAN	FABP5	sp|Q01469|FABP5_HUMAN Fatty acid-binding protein 5 OS=Homo sapiens OX=9606 GN=FABP5 PE=1 SV=3	2	7	7	7	65.9	15.164	119740	210560	78199	166240	577740	235130	145000	480300	415000	253060	175250	217630	674500	251614	347088	0.724927	0.394952
sp|Q96KP4|CNDP2_HUMAN	CNDP2	sp|Q96KP4|CNDP2_HUMAN Cytosolic non-specific dipeptidase OS=Homo sapiens OX=9606 GN=CNDP2 PE=1 SV=2	1	9	9	9	25.7	52.878		100780	26940	240860			84342	42526			98917	263910	48575	99089.6	137134	0.722575	0.603067
sp|Q08554|DSC1_HUMAN	DSC1	sp|Q08554|DSC1_HUMAN Desmocollin-1 OS=Homo sapiens OX=9606 GN=DSC1 PE=1 SV=2	1	6	6	6	8.7	99.986	70882		98071	287990	1374600	437420	46479	91720	557400	615980	111000	40220	1065400	343880	478000	0.719415	0.624559
sp|P52565|GDIR1_HUMAN	ARHGDIA	sp|P52565|GDIR1_HUMAN Rho GDP-dissociation inhibitor 1 OS=Homo sapiens OX=9606 GN=ARHGDIA PE=1 SV=3	1	5	5	5	22.5	23.207		174820	185580	206100		68928	230140	115640		154180	87727	441240		163535	227716	0.718153	0.446588
sp|P60900|PSA6_HUMAN	PSMA6	sp|P60900|PSA6_HUMAN Proteasome subunit alpha type-6 OS=Homo sapiens OX=9606 GN=PSMA6 PE=1 SV=1	1	9	9	9	44.3	27.399		107100	145130	67007			87843	55324			94209	242000	50659	92480.8	128956	0.71715	0.469754
sp|P0DP25|CALM3_HUMAN;sp|P0DP24|CALM2_HUMAN;sp|P0DP23|CALM1_HUMAN	CALM3	sp|P0DP25|CALM3_HUMAN Calmodulin-3 OS=Homo sapiens OX=9606 GN=CALM3 PE=1 SV=1;sp|P0DP24|CALM2_HUMAN Calmodulin-2 OS=Homo sapiens OX=9606 GN=CALM2 PE=1 SV=1;sp|P0DP23|CALM1_HUMAN Calmodulin-1 OS=Homo sapiens OX=9606 GN=CALM1 PE=1 SV=1	3	6	6	5	38.3	16.837	56630	249650	484620	332660	191970	161470	426340	414230		91028	321940	775930	429060	289696	404490	0.716202	0.370457
sp|P00918|CAH2_HUMAN	CA2	sp|P00918|CAH2_HUMAN Carbonic anhydrase 2 OS=Homo sapiens OX=9606 GN=CA2 PE=1 SV=2	1	12	12	12	52.7	29.246	11351000	3375100	6608100	2931600	3983000	3446000	3206100	5188600	2249600	16502000	6258400	8336900	1708900	5.01119e+06	7011160	0.714744	0.427825
sp|P35612|ADDB_HUMAN	ADD2	sp|P35612|ADDB_HUMAN Beta-adducin OS=Homo sapiens OX=9606 GN=ADD2 PE=1 SV=3	1	8	8	8	13.6	80.853		78848	122910	47299			75445	56374		89812	87757	142890		76175.2	106820	0.71312	0.21035
sp|Q9BRF8|CPPED_HUMAN	CPPED1	sp|Q9BRF8|CPPED_HUMAN Serine/threonine-protein phosphatase CPPED1 OS=Homo sapiens OX=9606 GN=CPPED1 PE=1 SV=3	1	2	2	2	7	35.548	59012	38836			42910	33160		36948		114190	39244	59366	23837	42173.2	59159.2	0.712876	0.378383
sp|P15924|DESP_HUMAN	DSP	sp|P15924|DESP_HUMAN Desmoplakin OS=Homo sapiens OX=9606 GN=DSP PE=1 SV=3	1	38	38	38	12.6	331.77	731980	115420	318690	870410	6198300	1624200	114420	362740	2689100	2002300	303580	155220	3939900	1292020	1818020	0.710674	0.636344
sp|P54578|UBP14_HUMAN	USP14	sp|P54578|UBP14_HUMAN Ubiquitin carboxyl-terminal hydrolase 14 OS=Homo sapiens OX=9606 GN=USP14 PE=1 SV=3	1	7	7	7	14.4	56.068		85506	122310	79018			81815	91793		65340	105410	218030		92088.4	129593	0.710595	0.32489
sp|P61088|UBE2N_HUMAN;sp|Q5JXB2|UE2NL_HUMAN	UBE2N	sp|P61088|UBE2N_HUMAN Ubiquitin-conjugating enzyme E2 N OS=Homo sapiens OX=9606 GN=UBE2N PE=1 SV=1;sp|Q5JXB2|UE2NL_HUMAN Putative ubiquitin-conjugating enzyme E2 N-like OS=Homo sapiens OX=9606 GN=UBE2NL PE=1 SV=1	2	4	4	4	28.9	17.138		71516	24872	31779			59462	63102		61823	51100	129430	40049	50146.2	70600.5	0.710281	0.351687
sp|P61956|SUMO2_HUMAN;sp|Q6EEV6|SUMO4_HUMAN;sp|P55854|SUMO3_HUMAN	SUMO2	sp|P61956|SUMO2_HUMAN Small ubiquitin-related modifier 2 OS=Homo sapiens OX=9606 GN=SUMO2 PE=1 SV=3;sp|Q6EEV6|SUMO4_HUMAN Small ubiquitin-related modifier 4 OS=Homo sapiens OX=9606 GN=SUMO4 PE=1 SV=2;sp|P55854|SUMO3_HUMAN Small ubiquitin-related modifier 3	3	2	2	2	23.2	10.871	142440	82575		124220		99838	86551	105540			129320	194440	129510	106861	151090	0.707265	0.0597358
sp|P22314|UBA1_HUMAN	UBA1	sp|P22314|UBA1_HUMAN Ubiquitin-like modifier-activating enzyme 1 OS=Homo sapiens OX=9606 GN=UBA1 PE=1 SV=3	1	14	14	14	18.1	117.85	49936	234470	222340	425760	97058	111250	185330	207210		53886	256170	655930	122770	191669	272189	0.704177	0.47297
sp|P02042|HBD_HUMAN	HBD	sp|P02042|HBD_HUMAN Hemoglobin subunit delta OS=Homo sapiens OX=9606 GN=HBD PE=1 SV=2	1	15	7	7	93.2	16.055	33579000	20553000	28069000	13851000	12852000	12893000	26704000	27429000	10189000	65800000	33237000	34416000	13235000	21991250	31375400	0.700907	0.292019
sp|P04040|CATA_HUMAN	CAT	sp|P04040|CATA_HUMAN Catalase OS=Homo sapiens OX=9606 GN=CAT PE=1 SV=3	1	23	23	23	47.6	59.755	13213000	5097400	9211400	5365000	9764300	7903800	5277900	6800400	4051900	26560000	8458500	13106000	3743700	7829150	11184020	0.70003	0.355529
sp|P14314|GLU2B_HUMAN	PRKCSH	sp|P14314|GLU2B_HUMAN Glucosidase 2 subunit beta OS=Homo sapiens OX=9606 GN=PRKCSH PE=1 SV=2	1	3	3	3	6.2	59.425		40666	56251	74961	39615	53349	51807	56090			48001	83980	97376	53248.4	76452.3	0.696492	0.0737558
sp|P27348|1433T_HUMAN	YWHAQ	sp|P27348|1433T_HUMAN 14-3-3 protein theta OS=Homo sapiens OX=9606 GN=YWHAQ PE=1 SV=1	1	11	9	8	40.8	27.764		168140	178350	249110	109870	132400	192560	133040		97723	152840	561470	144720	166210	239188	0.694892	0.395689
sp|P31150|GDIA_HUMAN	GDI1	sp|P31150|GDIA_HUMAN Rab GDP dissociation inhibitor alpha OS=Homo sapiens OX=9606 GN=GDI1 PE=1 SV=2	1	8	5	5	22.4	50.582		45399	58982	73002			51297	39343			41597	158750	32119	53604.6	77488.7	0.691773	0.466706
sp|Q00013|EM55_HUMAN	MPP1	sp|Q00013|EM55_HUMAN 55 kDa erythrocyte membrane protein OS=Homo sapiens OX=9606 GN=MPP1 PE=1 SV=2	1	4	4	4	11.4	52.296		41938	74336	33634			29968	35518		80069	54743	52733		43078.8	62515	0.689095	0.171279
sp|Q01082|SPTB2_HUMAN;sp|O15020|SPTN2_HUMAN	SPTBN1	sp|Q01082|SPTB2_HUMAN Spectrin beta chain, non-erythrocytic 1 OS=Homo sapiens OX=9606 GN=SPTBN1 PE=1 SV=2	2	59	56	56	31.6	274.61	191990	663830	482870	1066100	189070	478830	410600	437520		56611	508060	1870100	413680	490101	712113	0.688235	0.480887
sp|P10599|THIO_HUMAN	TXN	sp|P10599|THIO_HUMAN Thioredoxin OS=Homo sapiens OX=9606 GN=TXN PE=1 SV=3	1	3	3	3	29.5	11.737	579220	515370	500860	351730	474480	344380	544070	721080	303180	804270	749400	1164900	661130	503899	736576	0.68411	0.0781556
sp|Q9UL46|PSME2_HUMAN	PSME2	sp|Q9UL46|PSME2_HUMAN Proteasome activator complex subunit 2 OS=Homo sapiens OX=9606 GN=PSME2 PE=1 SV=4	1	3	3	3	13	27.401		36105	36685	39990			38493	30317		38642	49706	82089	43401	36318	53459.5	0.679355	0.0929215
sp|P23526|SAHH_HUMAN	AHCY	sp|P23526|SAHH_HUMAN Adenosylhomocysteinase OS=Homo sapiens OX=9606 GN=AHCY PE=1 SV=4	1	9	9	9	23.1	47.716	246360	253880	387760	316450		98351	295980	184000		447800	333910	609300	108890	254683	374975	0.6792	0.214019
sp|P00167|CYB5_HUMAN	CYB5A	sp|P00167|CYB5_HUMAN Cytochrome b5 OS=Homo sapiens OX=9606 GN=CYB5A PE=1 SV=2	1	4	4	4	42.5	15.33		29553	50863	23244			26667	36151			35603	52866	58737	33295.6	49068.7	0.678551	0.104301
sp|P40925|MDHC_HUMAN	MDH1	sp|P40925|MDHC_HUMAN Malate dehydrogenase, cytoplasmic OS=Homo sapiens OX=9606 GN=MDH1 PE=1 SV=4	1	6	6	6	23.7	36.426	190720	311100	343550	356650		60010	375390	126550		212060	321700	762460	193370	251996	372398	0.676685	0.325347
sp|P07203|GPX1_HUMAN	GPX1	sp|P07203|GPX1_HUMAN Glutathione peroxidase 1 OS=Homo sapiens OX=9606 GN=GPX1 PE=1 SV=4	1	5	5	5	25.1	22.088		109740	141580	106450		43657	85302	76392		170540	126890	151890	106660	93853.5	138995	0.675229	0.0571994
sp|O43707|ACTN4_HUMAN	ACTN4	sp|O43707|ACTN4_HUMAN Alpha-actinin-4 OS=Homo sapiens OX=9606 GN=ACTN4 PE=1 SV=2	1	23	23	13	32.4	104.85	52140	270230	144690	439330		82709	261690	218110			171100	715250	50248	209843	312199	0.672143	0.501516
sp|P05109|S10A8_HUMAN	S100A8	sp|P05109|S10A8_HUMAN Protein S100-A8 OS=Homo sapiens OX=9606 GN=S100A8 PE=1 SV=1	1	3	3	3	32.3	10.834	158210	262650	494300	361140	240340	429030	446880	510140	223070	903880	212340	1199200	172100	362836	542118	0.669294	0.325576
sp|P09211|GSTP1_HUMAN	GSTP1	sp|P09211|GSTP1_HUMAN Glutathione S-transferase P OS=Homo sapiens OX=9606 GN=GSTP1 PE=1 SV=2	1	8	8	8	48.1	23.356	297640	1003800	329010	602010		311820	483410	462830	138940	147200	431190	2815500	204200	498646	747406	0.667168	0.588398
sp|P08397|HEM3_HUMAN	HMBS	sp|P08397|HEM3_HUMAN Porphobilinogen deaminase OS=Homo sapiens OX=9606 GN=HMBS PE=1 SV=2	1	3	3	3	11.1	39.33		45445	16879	13757			40543	27903		28858	26803	74428		28905.4	43363	0.666591	0.344459
sp|P55072|TERA_HUMAN	VCP	sp|P55072|TERA_HUMAN Transitional endoplasmic reticulum ATPase OS=Homo sapiens OX=9606 GN=VCP PE=1 SV=4	1	21	21	21	33.5	89.321	271830	232230	384300	371370	131560	252720	263570	218240		216630	382430	891760	119440	265728	402565	0.660086	0.290716
sp|Q96G03|PGM2_HUMAN	PGM2	sp|Q96G03|PGM2_HUMAN Phosphoglucomutase-2 OS=Homo sapiens OX=9606 GN=PGM2 PE=1 SV=4	1	7	7	7	13.7	68.283		60826	55924	44086			74730	49324		83272	56383	168810	37657	56978	86530.5	0.658473	0.295588
sp|Q15149|PLEC_HUMAN	PLEC	sp|Q15149|PLEC_HUMAN Plectin OS=Homo sapiens OX=9606 GN=PLEC PE=1 SV=3	1	28	28	28	6.7	531.78		77922	153800	208040	49596	63936	194620	186730			118270	406100	83985	133521	202785	0.658434	0.37193
sp|P30043|BLVRB_HUMAN	BLVRB	sp|P30043|BLVRB_HUMAN Flavin reductase (NADPH) OS=Homo sapiens OX=9606 GN=BLVRB PE=1 SV=3	1	6	6	6	39.8	22.119	2166300	2782700	2410700	803290	1405200	850610	2154800	2744300	596660	4244700	2619200	6274600	858520	1.91474e+06	2918736	0.656016	0.286436
sp|P18669|PGAM1_HUMAN;sp|P15259|PGAM2_HUMAN;sp|Q8N0Y7|PGAM4_HUMAN	PGAM1	sp|P18669|PGAM1_HUMAN Phosphoglycerate mutase 1 OS=Homo sapiens OX=9606 GN=PGAM1 PE=1 SV=2;sp|P15259|PGAM2_HUMAN Phosphoglycerate mutase 2 OS=Homo sapiens OX=9606 GN=PGAM2 PE=1 SV=3	3	9	9	9	42.9	28.804	189210	314560	233650	346190	100640	115940	283790	162890		155290	276200	655920	247380	218359	333698	0.654361	0.217502
sp|P28074|PSB5_HUMAN	PSMB5	sp|P28074|PSB5_HUMAN Proteasome subunit beta type-5 OS=Homo sapiens OX=9606 GN=PSMB5 PE=1 SV=3	1	5	5	5	23.6	28.48	117520	56548	160160	93349	61523		74889	82592		209780	101960	181050	73368	92368.7	141540	0.6526	0.132936
sp|P07602|SAP_HUMAN	PSAP	sp|P07602|SAP_HUMAN Prosaposin OS=Homo sapiens OX=9606 GN=PSAP PE=1 SV=2	1	3	3	3	5.7	58.112		87996	116490	152460			142030	161790			170830	269850	168340	132153	203007	0.65098	0.0576126
sp|P28289|TMOD1_HUMAN;sp|Q9NZQ9|TMOD4_HUMAN	TMOD1	sp|P28289|TMOD1_HUMAN Tropomodulin-1 OS=Homo sapiens OX=9606 GN=TMOD1 PE=1 SV=1	2	7	7	7	18.9	40.569		34086	87114	46874			66168	52508		120440	63508	80720		57350	88222.7	0.65006	0.123497
sp|Q04760|LGUL_HUMAN	GLO1	sp|Q04760|LGUL_HUMAN Lactoylglutathione lyase OS=Homo sapiens OX=9606 GN=GLO1 PE=1 SV=4	1	4	4	4	23.9	20.777	190570	196750	190630	214830	104950	137050	172830	164970			194190	509450	89620	171572	264420	0.648864	0.23486
sp|P07585|PGS2_HUMAN	DCN	sp|P07585|PGS2_HUMAN Decorin OS=Homo sapiens OX=9606 GN=DCN PE=1 SV=1	1	9	9	8	28.1	39.746		697790	954450	1646400	1597300	1779300	825790	321690			1109100	873740	3185700	1.11753e+06	1.72285e+06	0.648654	0.304186
sp|O60664|PLIN3_HUMAN	PLIN3	sp|O60664|PLIN3_HUMAN Perilipin-3 OS=Homo sapiens OX=9606 GN=PLIN3 PE=1 SV=3	1	4	4	4	12.9	47.074		23406	19966	36899			47733	24934			33144	60532	47864	30587.6	47180	0.648317	0.113944
sp|P26447|S10A4_HUMAN	S100A4	sp|P26447|S10A4_HUMAN Protein S100-A4 OS=Homo sapiens OX=9606 GN=S100A4 PE=1 SV=1	1	5	5	5	36.6	11.728	422540	411680	544680	197150	300390	247240	547270	522770	225320	888990	645410	1143800	180920	399215	616888	0.647143	0.191669
sp|Q04917|1433F_HUMAN	YWHAH	sp|Q04917|1433F_HUMAN 14-3-3 protein eta OS=Homo sapiens OX=9606 GN=YWHAH PE=1 SV=4	1	7	5	5	26	28.218		48340	34505	131690		90190	115690	60022	66989		84792	221990		80072.8	124590	0.642689	0.297547
sp|Q16775|GLO2_HUMAN	HAGH	sp|Q16775|GLO2_HUMAN Hydroxyacylglutathione hydrolase, mitochondrial OS=Homo sapiens OX=9606 GN=HAGH PE=1 SV=2	1	7	7	7	27.6	33.805	329000	166570	205760	98827	160530	187970	91263	141570		502940	140870	311420	127510	172686	270685	0.63796	0.193768
sp|P10768|ESTD_HUMAN	ESD	sp|P10768|ESTD_HUMAN S-formylglutathione hydrolase OS=Homo sapiens OX=9606 GN=ESD PE=1 SV=2	1	5	5	5	27	31.462	281950	168620	269090	253620	94423	191710	160480	197080		594500	186490	416300	74928	202122	318054	0.635494	0.200261
sp|P34932|HSP74_HUMAN;sp|O95757|HS74L_HUMAN;sp|Q92598|HS105_HUMAN	HSPA4	sp|P34932|HSP74_HUMAN Heat shock 70 kDa protein 4 OS=Homo sapiens OX=9606 GN=HSPA4 PE=1 SV=4	3	11	11	11	19.5	94.33		54130	69548	90765			33966			24076	48357	222120		62102.2	98184.3	0.632507	0.534186
sp|P28066|PSA5_HUMAN	PSMA5	sp|P28066|PSA5_HUMAN Proteasome subunit alpha type-5 OS=Homo sapiens OX=9606 GN=PSMA5 PE=1 SV=3	1	5	5	5	29.5	26.411	110170	108510	138100	144760		73497	98045	105190		132040	125370	272130		111182	176513	0.629877	0.0756357
sp|Q12805|FBLN3_HUMAN	EFEMP1	sp|Q12805|FBLN3_HUMAN EGF-containing fibulin-like extracellular matrix protein 1 OS=Homo sapiens OX=9606 GN=EFEMP1 PE=1 SV=2	1	10	10	10	28	54.64		298260	114130	128880		86038	282270	148170	773280		157270	135980	54504	176291	280258	0.629031	0.475989
sp|P22392|NDKB_HUMAN;sp|O60361|NDK8_HUMAN	NME2	sp|P22392|NDKB_HUMAN Nucleoside diphosphate kinase B OS=Homo sapiens OX=9606 GN=NME2 PE=1 SV=1;sp|O60361|NDK8_HUMAN Putative nucleoside diphosphate kinase OS=Homo sapiens OX=9606 GN=NME2P1 PE=5 SV=1	2	5	2	2	32.2	17.298		156410	149920	121620			148000	125300		226170	159820	288530		140250	224840	0.623777	0.0257242
sp|P21266|GSTM3_HUMAN;sp|P46439|GSTM5_HUMAN	GSTM3	sp|P21266|GSTM3_HUMAN Glutathione S-transferase Mu 3 OS=Homo sapiens OX=9606 GN=GSTM3 PE=1 SV=3	2	7	7	6	35.6	26.559	81484	119010	97410	179350		59325	91228	114480	60569		136420	393600	91049	106041	170410	0.622272	0.298662
sp|P62879|GBB2_HUMAN;sp|Q9HAV0|GBB4_HUMAN	GNB2	sp|P62879|GBB2_HUMAN Guanine nucleotide-binding protein G(I)/G(S)/G(T) subunit beta-2 OS=Homo sapiens OX=9606 GN=GNB2 PE=1 SV=3;sp|Q9HAV0|GBB4_HUMAN Guanine nucleotide-binding protein subunit beta-4 OS=Homo sapiens OX=9606 GN=GNB4 PE=1 SV=3	2	5	5	2	16.8	37.331	112920	59666	56770	119090		76228	87080	62702		56406	125730	213850		82065.1	131995	0.621728	0.148172
sp|Q13813|SPTN1_HUMAN	SPTAN1	sp|Q13813|SPTN1_HUMAN Spectrin alpha chain, non-erythrocytic 1 OS=Homo sapiens OX=9606 GN=SPTAN1 PE=1 SV=3	1	59	59	59	29	284.54	462260	615000	653990	1565400	510030	825260	572300	479070		130590	566250	2879600	1005800	710414	1145560	0.620145	0.353047
sp|P00390|GSHR_HUMAN	GSR	sp|P00390|GSHR_HUMAN Glutathione reductase, mitochondrial OS=Homo sapiens OX=9606 GN=GSR PE=1 SV=2	1	6	6	6	15.9	56.256	80154	68691	100920	131320			80013	85801		132400	91989	216600		91149.8	146996	0.620082	0.0816224
sp|Q09666|AHNK_HUMAN	AHNAK	sp|Q09666|AHNK_HUMAN Neuroblast differentiation-associated protein AHNAK OS=Homo sapiens OX=9606 GN=AHNAK PE=1 SV=2	1	26	26	26	9.6	629.09		269990	161960	469470	149820	206160	555510	181290			300120	333680	759240	284886	464347	0.613519	0.208287
sp|P19105|ML12A_HUMAN;sp|O14950|ML12B_HUMAN;sp|P24844|MYL9_HUMAN	MYL12A	sp|P19105|ML12A_HUMAN Myosin regulatory light chain 12A OS=Homo sapiens OX=9606 GN=MYL12A PE=1 SV=2;sp|O14950|ML12B_HUMAN Myosin regulatory light chain 12B OS=Homo sapiens OX=9606 GN=MYL12B PE=1 SV=2	3	3	3	3	18.1	19.794	52338	81555	15787	97287		68360	63428	120160		12013	60283	277090		71273.6	116462	0.61199	0.415599
sp|P43034|LIS1_HUMAN	PAFAH1B1	sp|P43034|LIS1_HUMAN Platelet-activating factor acetylhydrolase IB subunit alpha OS=Homo sapiens OX=9606 GN=PAFAH1B1 PE=1 SV=2	1	5	5	5	18.3	46.637		54385	28636	32515			43632	39177		44907	48340	102600		39669	65282.3	0.607653	0.136579
sp|P35579|MYH9_HUMAN;sp|P35749|MYH11_HUMAN	MYH9	sp|P35579|MYH9_HUMAN Myosin-9 OS=Homo sapiens OX=9606 GN=MYH9 PE=1 SV=4	2	40	40	32	21.7	226.53	113590	336230	333980	675010	283160	314880	299520	291220		160680	393140	1257500	367520	330949	544710	0.607569	0.266734
sp|Q06830|PRDX1_HUMAN	PRDX1	sp|Q06830|PRDX1_HUMAN Peroxiredoxin-1 OS=Homo sapiens OX=9606 GN=PRDX1 PE=1 SV=1	1	13	12	11	69.8	22.11	458030	1355100	420150	414550	1821800	403050	820940	925790	373940	1326600	1036900	2694000	1400800	827426	1366448	0.605531	0.179654
sp|Q01518|CAP1_HUMAN	CAP1	sp|Q01518|CAP1_HUMAN Adenylyl cyclase-associated protein 1 OS=Homo sapiens OX=9606 GN=CAP1 PE=1 SV=5	1	9	9	9	23.8	51.901		132990	70161	162400	42607	88784	137880	104960		99440	122570	384070	95331	105683	175353	0.602689	0.236243
sp|P14550|AK1A1_HUMAN	AKR1A1	sp|P14550|AK1A1_HUMAN Aldo-keto reductase family 1 member A1 OS=Homo sapiens OX=9606 GN=AKR1A1 PE=1 SV=3	1	6	6	6	25.8	36.573		111290	33242	28275			77912	48889		43858	75652	179210		59921.6	99573.3	0.601784	0.316471
sp|P13798|ACPH_HUMAN	APEH	sp|P13798|ACPH_HUMAN Acylamino-acid-releasing enzyme OS=Homo sapiens OX=9606 GN=APEH PE=1 SV=4	1	10	10	10	16.4	81.224	178450	152710	348120	164820	98700	126880	158260	81347		233370	296690	454460	104260	163661	272195	0.601263	0.122344
sp|P29401|TKT_HUMAN	TKT	sp|P29401|TKT_HUMAN Transketolase OS=Homo sapiens OX=9606 GN=TKT PE=1 SV=3	1	11	11	10	23.6	67.877	239290	176590	185630	283980	150480	213620	282340	186080		360430	283460	644860	151070	214751	359955	0.596606	0.0797618
sp|Q14240|IF4A2_HUMAN	EIF4A2	sp|Q14240|IF4A2_HUMAN Eukaryotic initiation factor 4A-II OS=Homo sapiens OX=9606 GN=EIF4A2 PE=1 SV=2	1	7	7	3	20.6	46.402		190840	145800	107620			208700	89596		179530	173360	395790		148511	249560	0.595092	0.151911
sp|P32119|PRDX2_HUMAN	PRDX2	sp|P32119|PRDX2_HUMAN Peroxiredoxin-2 OS=Homo sapiens OX=9606 GN=PRDX2 PE=1 SV=5	1	13	13	12	54.5	21.892	8311800	5894600	7849600	3190600	12861000	3943400	7424600	9457900	6658400	24120000	8999700	16268000	6151400	7.36669e+06	12439500	0.592201	0.118023
sp|P16930|FAAA_HUMAN	FAH	sp|P16930|FAAA_HUMAN Fumarylacetoacetase OS=Homo sapiens OX=9606 GN=FAH PE=1 SV=2	1	4	4	4	11.2	46.374		44825	68483	53597		26135	62484	42343		113880	71848	103060	49258	49644.5	84511.5	0.587429	0.0377083
sp|P50395|GDIB_HUMAN	GDI2	sp|P50395|GDIB_HUMAN Rab GDP dissociation inhibitor beta OS=Homo sapiens OX=9606 GN=GDI2 PE=1 SV=2	1	15	15	12	36.6	50.663		461630	148780	116350		52339	328970	266220		291820	356740	836130	89916	229048	393652	0.581855	0.295695
sp|P47756|CAPZB_HUMAN	CAPZB	sp|P47756|CAPZB_HUMAN F-actin-capping protein subunit beta OS=Homo sapiens OX=9606 GN=CAPZB PE=1 SV=4	1	6	6	6	27.1	31.35		51632	45305				53286	43786		31276	95517	164890	41958	48502.2	83410.2	0.58149	0.298426
sp|P25789|PSA4_HUMAN	PSMA4	sp|P25789|PSA4_HUMAN Proteasome subunit alpha type-4 OS=Homo sapiens OX=9606 GN=PSMA4 PE=1 SV=1	1	3	3	3	13	29.483		44705	66972				41548	29958		57868	53959	124500		45795.8	78775.7	0.581344	0.180976
sp|Q9UBP4|DKK3_HUMAN	DKK3	sp|Q9UBP4|DKK3_HUMAN Dickkopf-related protein 3 OS=Homo sapiens OX=9606 GN=DKK3 PE=1 SV=2	1	7	7	7	27.4	38.39		61376	187830	160950			100150	54668	347280		283820	80645	69804	112995	195387	0.578312	0.271036
sp|Q16555|DPYL2_HUMAN;sp|Q14194|DPYL1_HUMAN	DPYSL2	sp|Q16555|DPYL2_HUMAN Dihydropyrimidinase-related protein 2 OS=Homo sapiens OX=9606 GN=DPYSL2 PE=1 SV=1	2	11	11	10	27.1	62.293		161390	113540	334820			155130	119910			166030	544020	211990	176958	307347	0.57576	0.250058
sp|P50990|TCPQ_HUMAN	CCT8	sp|P50990|TCPQ_HUMAN T-complex protein 1 subunit theta OS=Homo sapiens OX=9606 GN=CCT8 PE=1 SV=4	1	5	5	5	12.2	59.62		156200	268810	167430			145450			615960	181250	164040		184472	320417	0.575727	0.337502
sp|P07737|PROF1_HUMAN;CON__P02584	PFN1	sp|P07737|PROF1_HUMAN Profilin-1 OS=Homo sapiens OX=9606 GN=PFN1 PE=1 SV=2	2	5	5	5	43.6	15.054	148770	224300	42352	76786	152020	90248	216440	147140		158810	127230	498880	176780	137257	240425	0.570893	0.154293
sp|P53004|BIEA_HUMAN	BLVRA	sp|P53004|BIEA_HUMAN Biliverdin reductase A OS=Homo sapiens OX=9606 GN=BLVRA PE=1 SV=2	1	6	6	6	22.6	33.428		63197	63538				65645	56823		93427	75407	163300		62300.8	110711	0.562731	0.0844707
sp|P16452|EPB42_HUMAN	EPB42	sp|P16452|EPB42_HUMAN Erythrocyte membrane protein band 4.2 OS=Homo sapiens OX=9606 GN=EPB42 PE=1 SV=3	1	10	10	10	17.5	77.008	53807	198320	361480	278150	138680	69712	262600	83546		448980	637160	120890	120030	180787	331765	0.544924	0.174957
sp|Q9UNZ2|NSF1C_HUMAN	NSFL1C	sp|Q9UNZ2|NSF1C_HUMAN NSFL1 cofactor p47 OS=Homo sapiens OX=9606 GN=NSFL1C PE=1 SV=2	1	7	7	7	26.2	40.572		66146	52353	30321	74393		43125	52197			87992	131500	73386	53089.2	97626	0.543802	0.0197463
sp|P15531|NDKA_HUMAN	NME1	sp|P15531|NDKA_HUMAN Nucleoside diphosphate kinase A OS=Homo sapiens OX=9606 GN=NME1 PE=1 SV=1	1	5	5	2	34.9	17.149	465830	325690	513310	331060	269920	87781	391360	399650		1125100	524600	772650	149350	348075	642925	0.541393	0.0834732
sp|P09525|ANXA4_HUMAN	ANXA4	sp|P09525|ANXA4_HUMAN Annexin A4 OS=Homo sapiens OX=9606 GN=ANXA4 PE=1 SV=4	1	6	6	6	21	35.882	72844	122370	94572	162840		164830	104850	107420		71812	142700	447810		118532	220774	0.536894	0.192992
sp|Q9NZD4|AHSP_HUMAN	AHSP	sp|Q9NZD4|AHSP_HUMAN Alpha-hemoglobin-stabilizing protein OS=Homo sapiens OX=9606 GN=AHSP PE=1 SV=1	1	3	3	3	34.3	11.84		142570	98685	83661			95999	139190		158410	119820	349600		112021	209277	0.535277	0.123562
sp|P31146|COR1A_HUMAN	CORO1A	sp|P31146|COR1A_HUMAN Coronin-1A OS=Homo sapiens OX=9606 GN=CORO1A PE=1 SV=4	1	5	5	5	13.4	51.026		19538	19602	24131			50564	8415.9		14786	19425	106200		24450.2	46803.7	0.522399	0.380952
sp|P08133|ANXA6_HUMAN	ANXA6	sp|P08133|ANXA6_HUMAN Annexin A6 OS=Homo sapiens OX=9606 GN=ANXA6 PE=1 SV=3	1	15	15	15	24.8	75.872	43240	139420	84651	129430		203840	132990	118550			165030	474690	62539	121732	234086	0.520029	0.196591
sp|P13716|HEM2_HUMAN	ALAD	sp|P13716|HEM2_HUMAN Delta-aminolevulinic acid dehydratase OS=Homo sapiens OX=9606 GN=ALAD PE=1 SV=1	1	10	10	10	35.5	36.294	431340	363730	723020	305190	123070	210120	215610	260620		441610	474420	993780		329088	636603	0.516943	0.0683919
sp|P58546|MTPN_HUMAN	MTPN	sp|P58546|MTPN_HUMAN Myotrophin OS=Homo sapiens OX=9606 GN=MTPN PE=1 SV=2	1	2	2	2	22	12.895		71152	72260				58147	66341		91007	64361	235110		66975	130159	0.514562	0.215188
sp|P20073|ANXA7_HUMAN	ANXA7	sp|P20073|ANXA7_HUMAN Annexin A7 OS=Homo sapiens OX=9606 GN=ANXA7 PE=1 SV=3	1	6	6	6	14.3	52.739		42925	65440	36807			42949	46998		73430	69152	133640		47023.8	92074	0.510717	0.0344727
sp|Q06323|PSME1_HUMAN	PSME1	sp|Q06323|PSME1_HUMAN Proteasome activator complex subunit 1 OS=Homo sapiens OX=9606 GN=PSME1 PE=1 SV=1	1	9	9	9	37.3	28.723		141060	216530	196640		60469	180120	140670		166020	244920	505160		155915	305367	0.510582	0.0860955
sp|P48506|GSH1_HUMAN	GCLC	sp|P48506|GSH1_HUMAN Glutamate--cysteine ligase catalytic subunit OS=Homo sapiens OX=9606 GN=GCLC PE=1 SV=2	1	11	11	11	19.6	72.765		71028	146380	73049			112580	81226		115460	154410	299820		96852.6	189897	0.510028	0.0856408
sp|P20774|MIME_HUMAN	OGN	sp|P20774|MIME_HUMAN Mimecan OS=Homo sapiens OX=9606 GN=OGN PE=1 SV=1	1	4	4	4	12.1	33.922	168000	112430	377700	1293900	40123	224370	662400	170100	101960	32327	63921	893230	2829200	381128	784128	0.486053	0.393143
sp|P29966|MARCS_HUMAN	MARCKS	sp|P29966|MARCS_HUMAN Myristoylated alanine-rich C-kinase substrate OS=Homo sapiens OX=9606 GN=MARCKS PE=1 SV=4	1	3	3	3	16.3	31.554		22076	103090	33856		17628	31463				21690	84618	151080	41622.6	85796	0.485135	0.24582
sp|P02100|HBE_HUMAN	HBE1	sp|P02100|HBE_HUMAN Hemoglobin subunit epsilon OS=Homo sapiens OX=9606 GN=HBE1 PE=1 SV=2	1	3	1	1	18.4	16.203	175640	185690	215250	701560	43980		465780	300420		300630	238450	613290	1359300	298331	627918	0.475112	0.164019
sp|P30740|ILEU_HUMAN	SERPINB1	sp|P30740|ILEU_HUMAN Leukocyte elastase inhibitor OS=Homo sapiens OX=9606 GN=SERPINB1 PE=1 SV=1	1	10	10	10	33	42.741		90642	54494	38513			125730	71552		37417	80856	399310		76186.2	172528	0.441588	0.303996
sp|P61769|B2MG_HUMAN	B2M	sp|P61769|B2MG_HUMAN Beta-2-microglobulin OS=Homo sapiens OX=9606 GN=B2M PE=1 SV=1	1	2	2	2	16.8	13.714	121480	196320	187240	21060	181540	235760	321870	188390	1314700	123160	479410	121360	159590	181708	439644	0.413306	0.180191
sp|P81605|DCD_HUMAN	DCD	sp|P81605|DCD_HUMAN Dermcidin OS=Homo sapiens OX=9606 GN=DCD PE=1 SV=2	1	2	2	2	20	11.284			56383	280030	928570	393860		189360	572480	603020		67307	2536200	369641	944752	0.391257	0.294614
sp|P21810|PGS1_HUMAN	BGN	sp|P21810|PGS1_HUMAN Biglycan OS=Homo sapiens OX=9606 GN=BGN PE=1 SV=2	1	6	5	5	18.2	41.654	102800	191720	100070	550610		391840	512430	29129			84979	50279	1980800	268371	705353	0.380478	0.308619
sp|P20962|PTMS_HUMAN	PTMS	sp|P20962|PTMS_HUMAN Parathymosin OS=Homo sapiens OX=9606 GN=PTMS PE=1 SV=2	1	3	3	3	22.5	11.53		52698	74114	120120	41101		50619				56959	191750	327910	67730.4	192206	0.352384	0.0840076
sp|P09497|CLCB_HUMAN	CLTB	sp|P09497|CLCB_HUMAN Clathrin light chain B OS=Homo sapiens OX=9606 GN=CLTB PE=1 SV=1	1	2	2	2	8.3	25.19			68720	313340			119480	149800			739410	293210	425360	162835	485993	0.335056	0.0518221
sp|Q02952|AKA12_HUMAN	AKAP12	sp|Q02952|AKA12_HUMAN A-kinase anchor protein 12 OS=Homo sapiens OX=9606 GN=AKAP12 PE=1 SV=4	1	10	10	10	8.7	191.48		19333	62484	43633		21550	40144				27573	128460	199990	37428.8	118674	0.315391	0.0764655
sp|P05090|APOD_HUMAN	APOD	sp|P05090|APOD_HUMAN Apolipoprotein D OS=Homo sapiens OX=9606 GN=APOD PE=1 SV=1	1	6	6	6	31.2	21.275	741560	1713600	1903500	5469500	4315900	698890	6980100	2021700	39161000	1380100	2127700	1166500	5348700	2.98059e+06	9836800	0.303004	0.259201
sp|P69891|HBG1_HUMAN	HBG1	sp|P69891|HBG1_HUMAN Hemoglobin subunit gamma-1 OS=Homo sapiens OX=9606 GN=HBG1 PE=1 SV=2	1	13	12	2	80.3	16.14	2192300	3013600	3840200	4281200	1090000	818910	9171500	2243500	933150	44254000	6578800	3901200	2734900	3.3314e+06	11680410	0.285213	0.219606
sp|P69892|HBG2_HUMAN	HBG2	sp|P69892|HBG2_HUMAN Hemoglobin subunit gamma-2 OS=Homo sapiens OX=9606 GN=HBG2 PE=1 SV=2	1	12	1	1	78.9	16.126			76578	288900	246810		1212000			5776600	999540	388440	72846	456072	1.80936e+06	0.252063	0.358341
sp|P01034|CYTC_HUMAN	CST3	sp|P01034|CYTC_HUMAN Cystatin-C OS=Homo sapiens OX=9606 GN=CST3 PE=1 SV=1	1	4	4	4	30.8	15.799		370920	74621	66227			320820	55998	1541900		665830	221240		177717	809657	0.219497	0.078188

## Sheet: Solely Identified Proteins
Table S3. Solely identified proteins
Protein IDs	Gene Name	Fasta headers	Number of proteins	Peptides	Razor + unique peptides	Unique peptides	Sequence coverage [%]	Mol. weight [kDa]	LFQ intensity A1	LFQ intensity A3	LFQ intensity A4	LFQ intensity A5	LFQ intensity A6	LFQ intensity A7	LFQ intensity A9	LFQ intensity A10	LFQ intensity N1	LFQ intensity N2	LFQ intensity N3	LFQ intensity N4	LFQ intensity N6
sp|P02776|PLF4_HUMAN;sp|P10720|PF4V_HUMAN	PF4	sp|P02776|PLF4_HUMAN Platelet factor 4 OS=Homo sapiens OX=9606 GN=PF4 PE=1 SV=2;sp|P10720|PF4V_HUMAN Platelet factor 4 variant OS=Homo sapiens OX=9606 GN=PF4V1 PE=1 SV=1	2	3	3	3	34.7	10.845		37464	53379				41332	53248
sp|P07998|RNAS1_HUMAN	RNASE1	sp|P07998|RNAS1_HUMAN Ribonuclease pancreatic OS=Homo sapiens OX=9606 GN=RNASE1 PE=1 SV=4	1	3	3	3	35.3	17.644		316840	18194	19127			17470
sp|P11226|MBL2_HUMAN	MBL2	sp|P11226|MBL2_HUMAN Mannose-binding protein C OS=Homo sapiens OX=9606 GN=MBL2 PE=1 SV=2	1	2	2	2	8.9	26.143			45118	32501			50854	13572
sp|P20851|C4BPB_HUMAN	C4BPB	sp|P20851|C4BPB_HUMAN C4b-binding protein beta chain OS=Homo sapiens OX=9606 GN=C4BPB PE=1 SV=1	1	3	3	3	15.1	28.357		19468	55636				24308	24960
sp|Q00796|DHSO_HUMAN	SORD	sp|Q00796|DHSO_HUMAN Sorbitol dehydrogenase OS=Homo sapiens OX=9606 GN=SORD PE=1 SV=4	1	4	4	3	17.6	38.324		42042	15417	24222			21938
sp|Q9NQC3|RTN4_HUMAN	RTN4	sp|Q9NQC3|RTN4_HUMAN Reticulon-4 OS=Homo sapiens OX=9606 GN=RTN4 PE=1 SV=2	1	2	2	2	2.3	129.93		17655	16561	52593			19269
sp|A0A0C4DH67|KV108_HUMAN;sp|A0A0C4DH69|KV109_HUMAN	IGKV1-8	sp|A0A0C4DH67|KV108_HUMAN Immunoglobulin kappa variable 1-8 OS=Homo sapiens OX=9606 GN=IGKV1-8 PE=3 SV=1;sp|A0A0C4DH69|KV109_HUMAN Immunoglobulin kappa variable 1-9 OS=Homo sapiens OX=9606 GN=IGKV1-9 PE=3 SV=1	2	3	3	2	42.6	12.537		67058	72576	68941			92785	30161
sp|P19961|AMY2B_HUMAN;sp|P04746|AMYP_HUMAN;sp|P04745|AMY1_HUMAN;CON__Q3MHH8	AMY2B	sp|P19961|AMY2B_HUMAN Alpha-amylase 2B OS=Homo sapiens OX=9606 GN=AMY2B PE=1 SV=1;sp|P04746|AMYP_HUMAN Pancreatic alpha-amylase OS=Homo sapiens OX=9606 GN=AMY2A PE=1 SV=2;sp|P04745|AMY1_HUMAN Alpha-amylase 1 OS=Homo sapiens OX=9606 GN=AMY1A PE=1 SV=2	4	4	4	4	10.8	57.709		14852	266300	38218		57096		27264
sp|Q16181|SEPT7_HUMAN	SEPTIN7	sp|Q16181|SEPT7_HUMAN Septin-7 OS=Homo sapiens OX=9606 GN=SEPTIN7 PE=1 SV=2	1	3	3	3	7.1	50.679		17681	7238.6	20093		10167	13790	9882.2
sp|Q16674|MIA_HUMAN	MIA	sp|Q16674|MIA_HUMAN Melanoma-derived growth regulatory protein OS=Homo sapiens OX=9606 GN=MIA PE=1 SV=1	1	3	3	3	21.4	14.509		1979600	159010	150260		189270	57261	214780
sp|P00742|FA10_HUMAN	F10	sp|P00742|FA10_HUMAN Coagulation factor X OS=Homo sapiens OX=9606 GN=F10 PE=1 SV=2	1	2	2	2	5.5	54.731		16724	17596				16190	21483
sp|P05455|LA_HUMAN	SSB	sp|P05455|LA_HUMAN Lupus La protein OS=Homo sapiens OX=9606 GN=SSB PE=1 SV=2	1	2	2	2	5.4	46.836		25242	17335	35484			20993
sp|P12955|PEPD_HUMAN	PEPD	sp|P12955|PEPD_HUMAN Xaa-Pro dipeptidase OS=Homo sapiens OX=9606 GN=PEPD PE=1 SV=3	1	6	6	6	16.8	54.548		32126	28931	26828			54898
sp|P15169|CBPN_HUMAN	CPN1	sp|P15169|CBPN_HUMAN Carboxypeptidase N catalytic chain OS=Homo sapiens OX=9606 GN=CPN1 PE=1 SV=1	1	2	2	2	4.8	52.286		28181	55378				77911	22412
sp|P23396|RS3_HUMAN	RPS3	sp|P23396|RS3_HUMAN 40S ribosomal protein S3 OS=Homo sapiens OX=9606 GN=RPS3 PE=1 SV=2	1	3	3	3	14.4	26.688		13083		57236			13748	14450
sp|P24539|AT5F1_HUMAN	ATP5PB	sp|P24539|AT5F1_HUMAN ATP synthase F(0) complex subunit B1, mitochondrial OS=Homo sapiens OX=9606 GN=ATP5PB PE=1 SV=2	1	2	2	2	7.8	28.908		11644	10599	15491			14860
sp|P36980|FHR2_HUMAN	CFHR2	sp|P36980|FHR2_HUMAN Complement factor H-related protein 2 OS=Homo sapiens OX=9606 GN=CFHR2 PE=1 SV=1	1	4	2	2	17.4	30.65		2828.2		16788			158070	90790
sp|P50991|TCPD_HUMAN	CCT4	sp|P50991|TCPD_HUMAN T-complex protein 1 subunit delta OS=Homo sapiens OX=9606 GN=CCT4 PE=1 SV=4	1	4	4	4	10	57.924		25974	36071	28664			20632
sp|Q14697|GANAB_HUMAN	GANAB	sp|Q14697|GANAB_HUMAN Neutral alpha-glucosidase AB OS=Homo sapiens OX=9606 GN=GANAB PE=1 SV=3	1	7	7	7	9.9	106.87		50156	22775	43211			23999
sp|Q14767|LTBP2_HUMAN	LTBP2	sp|Q14767|LTBP2_HUMAN Latent-transforming growth factor beta-binding protein 2 OS=Homo sapiens OX=9606 GN=LTBP2 PE=1 SV=3	1	10	10	10	8.8	195.05		480150		21191		263560	14920
sp|Q86SQ4|AGRG6_HUMAN	ADGRG6	sp|Q86SQ4|AGRG6_HUMAN Adhesion G-protein coupled receptor G6 OS=Homo sapiens OX=9606 GN=ADGRG6 PE=1 SV=3	1	6	6	6	6.4	136.69		348410	18738	50472		54130
sp|Q9H299|SH3L3_HUMAN	SH3BGRL3	sp|Q9H299|SH3L3_HUMAN SH3 domain-binding glutamic acid-rich-like protein 3 OS=Homo sapiens OX=9606 GN=SH3BGRL3 PE=1 SV=1	1	3	3	3	31.2	10.438		137640	108000				126070	109380
sp|Q9UJU6|DBNL_HUMAN	DBNL	sp|Q9UJU6|DBNL_HUMAN Drebrin-like protein OS=Homo sapiens OX=9606 GN=DBNL PE=1 SV=1	1	2	2	2	6.3	48.207		15258	7989.3	13049			15823
sp|A0A075B6J9|LV218_HUMAN	IGLV2-18	sp|A0A075B6J9|LV218_HUMAN Immunoglobulin lambda variable 2-18 OS=Homo sapiens OX=9606 GN=IGLV2-18 PE=3 SV=2	1	3	3	2	24.6	12.412		58397	151820	74434			341720	43068
sp|O00560|SDCB1_HUMAN	SDCBP	sp|O00560|SDCB1_HUMAN Syntenin-1 OS=Homo sapiens OX=9606 GN=SDCBP PE=1 SV=1	1	3	3	3	16.1	32.444		58823	22966	33769			15931	15606
sp|O43490|PROM1_HUMAN	PROM1	sp|O43490|PROM1_HUMAN Prominin-1 OS=Homo sapiens OX=9606 GN=PROM1 PE=1 SV=1	1	9	9	9	13.8	97.201		587450	71215	102930		26474	20426
sp|Q6UWR7|ENPP6_HUMAN	ENPP6	sp|Q6UWR7|ENPP6_HUMAN Glycerophosphocholine cholinephosphodiesterase ENPP6 OS=Homo sapiens OX=9606 GN=ENPP6 PE=1 SV=2	1	4	4	4	11.4	50.24		37265	68298	149350			25314	19310
sp|P35625|TIMP3_HUMAN	TIMP3	sp|P35625|TIMP3_HUMAN Metalloproteinase inhibitor 3 OS=Homo sapiens OX=9606 GN=TIMP3 PE=1 SV=2	1	8	8	8	41.2	24.145		1019100	11607	7331.1		28241	18538
sp|Q6UXB8|PI16_HUMAN	PI16	sp|Q6UXB8|PI16_HUMAN Peptidase inhibitor 16 OS=Homo sapiens OX=9606 GN=PI16 PE=1 SV=1	1	5	5	5	13.4	49.471		32349	84240	88270			109220	27024
sp|Q99969|RARR2_HUMAN	RARRES2	sp|Q99969|RARR2_HUMAN Retinoic acid receptor responder protein 2 OS=Homo sapiens OX=9606 GN=RARRES2 PE=1 SV=1	1	4	4	4	22.1	18.617		511970		11383		93427	15748	13201
sp|P03973|SLPI_HUMAN	SLPI	sp|P03973|SLPI_HUMAN Antileukoproteinase OS=Homo sapiens OX=9606 GN=SLPI PE=1 SV=2	1	8	8	8	40.9	14.326		4541300	53420	62763		1301200	52811	42639
sp|Q00610|CLH1_HUMAN;sp|P53675|CLH2_HUMAN	CLTC	sp|Q00610|CLH1_HUMAN Clathrin heavy chain 1 OS=Homo sapiens OX=9606 GN=CLTC PE=1 SV=5	2	12	12	12	9.7	191.61		106810	44354	137570		38585	98646	37252
sp|Q8TDL5|BPIB1_HUMAN	BPIFB1	sp|Q8TDL5|BPIB1_HUMAN BPI fold-containing family B member 1 OS=Homo sapiens OX=9606 GN=BPIFB1 PE=1 SV=1	1	20	20	20	51.4	52.441		12442000	72740	97511		280260	176550	13396
sp|A0A0A0MT36|KVD21_HUMAN;sp|A0A0C4DH26|KVD41_HUMAN	IGKV6D-21	sp|A0A0A0MT36|KVD21_HUMAN Immunoglobulin kappa variable 6D-21 OS=Homo sapiens OX=9606 GN=IGKV6D-21 PE=3 SV=1	2	3	3	1	28.9	12.34		242010	22380				90412	32296
sp|A0A0C4DH34|HV428_HUMAN	IGHV4-28	sp|A0A0C4DH34|HV428_HUMAN Immunoglobulin heavy variable 4-28 OS=Homo sapiens OX=9606 GN=IGHV4-28 PE=3 SV=1	1	2	2	2	21.4	13.124		246830	155650				212350	155610
sp|E9PAV3|NACAM_HUMAN;sp|Q13765|NACA_HUMAN;sp|Q9BZK3|NACP4_HUMAN	NACA	sp|E9PAV3|NACAM_HUMAN Nascent polypeptide-associated complex subunit alpha, muscle-specific form OS=Homo sapiens OX=9606 GN=NACA PE=1 SV=1;sp|Q13765|NACA_HUMAN Nascent polypeptide-associated complex subunit alpha OS=Homo sapiens OX=9606 GN=NACA PE=1 SV=1	3	3	3	3	2	205.42		23147	23245	34130			15660
sp|O00231|PSD11_HUMAN	PSMD11	sp|O00231|PSD11_HUMAN 26S proteasome non-ATPase regulatory subunit 11 OS=Homo sapiens OX=9606 GN=PSMD11 PE=1 SV=3	1	4	4	4	11.4	47.463		18886	14848	13686			14059
sp|O14618|CCS_HUMAN	CCS	sp|O14618|CCS_HUMAN Copper chaperone for superoxide dismutase OS=Homo sapiens OX=9606 GN=CCS PE=1 SV=1	1	3	3	3	10.9	29.04		33092		50167			49901	79164
sp|O15067|PUR4_HUMAN	PFAS	sp|O15067|PUR4_HUMAN Phosphoribosylformylglycinamidine synthase OS=Homo sapiens OX=9606 GN=PFAS PE=1 SV=4	1	4	4	4	3.7	144.73		13073	30153	19516			27572
sp|O43396|TXNL1_HUMAN	TXNL1	sp|O43396|TXNL1_HUMAN Thioredoxin-like protein 1 OS=Homo sapiens OX=9606 GN=TXNL1 PE=1 SV=3	1	4	4	4	25.3	32.251		25980	33799				21636	22954
sp|O75083|WDR1_HUMAN	WDR1	sp|O75083|WDR1_HUMAN WD repeat-containing protein 1 OS=Homo sapiens OX=9606 GN=WDR1 PE=1 SV=4	1	5	5	5	12.2	66.193		35691	39407	42369			31173
sp|O75955|FLOT1_HUMAN	FLOT1	sp|O75955|FLOT1_HUMAN Flotillin-1 OS=Homo sapiens OX=9606 GN=FLOT1 PE=1 SV=3	1	5	5	5	14.8	47.355		31791	64332	31235			31674
sp|Q14847|LASP1_HUMAN	LASP1	sp|Q14847|LASP1_HUMAN LIM and SH3 domain protein 1 OS=Homo sapiens OX=9606 GN=LASP1 PE=1 SV=2	1	4	4	4	17.2	29.717		43750	24088	46141			90509
sp|P04433|KV311_HUMAN;sp|A0A0A0MRZ8|KVD11_HUMAN	IGKV3-11	sp|P04433|KV311_HUMAN Immunoglobulin kappa variable 3-11 OS=Homo sapiens OX=9606 GN=IGKV3-11 PE=1 SV=1;sp|A0A0A0MRZ8|KVD11_HUMAN Immunoglobulin kappa variable 3D-11 OS=Homo sapiens OX=9606 GN=IGKV3D-11 PE=3 SV=6	2	3	3	3	26.1	12.575		2044600	813770				1786400	379300
sp|P07108|ACBP_HUMAN	DBI	sp|P07108|ACBP_HUMAN Acyl-CoA-binding protein OS=Homo sapiens OX=9606 GN=DBI PE=1 SV=2	1	2	2	2	41.4	10.044		37454	31526				90421	43185
sp|P07339|CATD_HUMAN	CTSD	sp|P07339|CATD_HUMAN Cathepsin D OS=Homo sapiens OX=9606 GN=CTSD PE=1 SV=1	1	5	5	5	16	44.552		87874		79338			65575	121680
sp|P09455|RET1_HUMAN	RBP1	sp|P09455|RET1_HUMAN Retinol-binding protein 1 OS=Homo sapiens OX=9606 GN=RBP1 PE=1 SV=2	1	3	3	3	25.2	15.85		50708		29816			24453	12300
sp|P09651|ROA1_HUMAN;sp|Q32P51|RA1L2_HUMAN	HNRNPA1	sp|P09651|ROA1_HUMAN Heterogeneous nuclear ribonucleoprotein A1 OS=Homo sapiens OX=9606 GN=HNRNPA1 PE=1 SV=5;sp|Q32P51|RA1L2_HUMAN Heterogeneous nuclear ribonucleoprotein A1-like 2 OS=Homo sapiens OX=9606 GN=HNRNPA1L2 PE=2 SV=2	2	4	4	4	15.1	38.746		47253	45507				51957	66724
sp|P09960|LKHA4_HUMAN	LTA4H	sp|P09960|LKHA4_HUMAN Leukotriene A-4 hydrolase OS=Homo sapiens OX=9606 GN=LTA4H PE=1 SV=2	1	10	10	10	23.1	69.284		90090	80830	68282			101550
sp|P12109|CO6A1_HUMAN	COL6A1	sp|P12109|CO6A1_HUMAN Collagen alpha-1(VI) chain OS=Homo sapiens OX=9606 GN=COL6A1 PE=1 SV=3	1	6	6	6	8.6	108.53		116700	39701	18159			27973
sp|P13796|PLSL_HUMAN	LCP1	sp|P13796|PLSL_HUMAN Plastin-2 OS=Homo sapiens OX=9606 GN=LCP1 PE=1 SV=6	1	11	11	7	22.5	70.288		362310	385340				613150	404930
sp|P17858|PFKAL_HUMAN;sp|Q01813|PFKAP_HUMAN	PFKL	sp|P17858|PFKAL_HUMAN ATP-dependent 6-phosphofructokinase, liver type OS=Homo sapiens OX=9606 GN=PFKL PE=1 SV=6	2	4	4	4	8.8	85.018		19508	17351	22803			26942
sp|P17936|IBP3_HUMAN	IGFBP3	sp|P17936|IBP3_HUMAN Insulin-like growth factor-binding protein 3 OS=Homo sapiens OX=9606 GN=IGFBP3 PE=1 SV=2	1	2	2	2	11	31.674		54112	37307	19329			20939
sp|P30049|ATPD_HUMAN	ATP5F1D	sp|P30049|ATPD_HUMAN ATP synthase subunit delta, mitochondrial OS=Homo sapiens OX=9606 GN=ATP5F1D PE=1 SV=2	1	2	2	2	13.7	17.49		29542	31339				34503	33959
sp|P30613|KPYR_HUMAN	PKLR	sp|P30613|KPYR_HUMAN Pyruvate kinase PKLR OS=Homo sapiens OX=9606 GN=PKLR PE=1 SV=2	1	4	3	3	8.5	61.829		17368	22740				25997	20474
sp|P31151|S10A7_HUMAN	S100A7	sp|P31151|S10A7_HUMAN Protein S100-A7 OS=Homo sapiens OX=9606 GN=S100A7 PE=1 SV=4	1	5	5	3	24.8	11.471		6308.9		17070			10381	1363200
sp|P34096|RNAS4_HUMAN	RNASE4	sp|P34096|RNAS4_HUMAN Ribonuclease 4 OS=Homo sapiens OX=9606 GN=RNASE4 PE=1 SV=3	1	4	4	4	34	16.84		311290	13251	13308		27026
sp|P35858|ALS_HUMAN	IGFALS	sp|P35858|ALS_HUMAN Insulin-like growth factor-binding protein complex acid labile subunit OS=Homo sapiens OX=9606 GN=IGFALS PE=1 SV=1	1	12	12	12	23.6	66.034		308360	151340	62870			136230
sp|P40926|MDHM_HUMAN	MDH2	sp|P40926|MDHM_HUMAN Malate dehydrogenase, mitochondrial OS=Homo sapiens OX=9606 GN=MDH2 PE=1 SV=3	1	5	5	5	18.3	35.503		46156		77510			107450	82757
sp|P41222|PTGDS_HUMAN	PTGDS	sp|P41222|PTGDS_HUMAN Prostaglandin-H2 D-isomerase OS=Homo sapiens OX=9606 GN=PTGDS PE=1 SV=1	1	2	2	2	17.4	21.029		778450	710710				2243100	182340
sp|P49247|RPIA_HUMAN	RPIA	sp|P49247|RPIA_HUMAN Ribose-5-phosphate isomerase OS=Homo sapiens OX=9606 GN=RPIA PE=1 SV=3	1	2	2	2	10.3	33.269		35534	71891				37846	26357
sp|P49908|SEPP1_HUMAN	SELENOP	sp|P49908|SEPP1_HUMAN Selenoprotein P OS=Homo sapiens OX=9606 GN=SELENOP PE=1 SV=3	1	3	3	3	8.1	43.173		24811		38368			63560	44300
sp|P54920|SNAA_HUMAN	NAPA	sp|P54920|SNAA_HUMAN Alpha-soluble NSF attachment protein OS=Homo sapiens OX=9606 GN=NAPA PE=1 SV=3	1	5	5	5	21.7	33.232		82117	17310				41459	36816
sp|P55795|HNRH2_HUMAN;sp|P31943|HNRH1_HUMAN	HNRNPH2	sp|P55795|HNRH2_HUMAN Heterogeneous nuclear ribonucleoprotein H2 OS=Homo sapiens OX=9606 GN=HNRNPH2 PE=1 SV=1;sp|P31943|HNRH1_HUMAN Heterogeneous nuclear ribonucleoprotein H OS=Homo sapiens OX=9606 GN=HNRNPH1 PE=1 SV=4	2	3	3	2	8.7	49.263		27251		30139			27886	46247
sp|P61158|ARP3_HUMAN;sp|Q9P1U1|ARP3B_HUMAN	ACTR3	sp|P61158|ARP3_HUMAN Actin-related protein 3 OS=Homo sapiens OX=9606 GN=ACTR3 PE=1 SV=3	2	3	3	3	8.6	47.371		8005.5		39622			41863	20835
sp|P67809|YBOX1_HUMAN;sp|Q9Y2T7|YBOX2_HUMAN;sp|P16989|YBOX3_HUMAN	YBX1	sp|P67809|YBOX1_HUMAN Y-box-binding protein 1 OS=Homo sapiens OX=9606 GN=YBX1 PE=1 SV=3;sp|Q9Y2T7|YBOX2_HUMAN Y-box-binding protein 2 OS=Homo sapiens OX=9606 GN=YBX2 PE=1 SV=2;sp|P16989|YBOX3_HUMAN Y-box-binding protein 3 OS=Homo sapiens OX=9606 GN=YBX3 PE	3	2	2	2	9.3	35.924		10014	14741	19039			18095
sp|Q13126|MTAP_HUMAN	MTAP	sp|Q13126|MTAP_HUMAN S-methyl-5-thioadenosine phosphorylase OS=Homo sapiens OX=9606 GN=MTAP PE=1 SV=2	1	4	4	4	20.1	31.236		27164	29255	45365			29182
sp|Q13200|PSMD2_HUMAN	PSMD2	sp|Q13200|PSMD2_HUMAN 26S proteasome non-ATPase regulatory subunit 2 OS=Homo sapiens OX=9606 GN=PSMD2 PE=1 SV=3	1	7	7	7	10.6	100.2		26172	40667	52713			31945
sp|Q13421|MSLN_HUMAN	MSLN	sp|Q13421|MSLN_HUMAN Mesothelin OS=Homo sapiens OX=9606 GN=MSLN PE=1 SV=2	1	4	4	4	8.4	68.985		380660	89187	110930			53844
sp|Q13449|LSAMP_HUMAN	LSAMP	sp|Q13449|LSAMP_HUMAN Limbic system-associated membrane protein OS=Homo sapiens OX=9606 GN=LSAMP PE=1 SV=2	1	4	4	4	14.5	37.393		97879	13450				3910	4658.5
sp|Q15257|PTPA_HUMAN	PTPA	sp|Q15257|PTPA_HUMAN Serine/threonine-protein phosphatase 2A activator OS=Homo sapiens OX=9606 GN=PTPA PE=1 SV=3	1	4	4	4	13.1	40.667		56698	57381				78048	61368
sp|Q15435|PP1R7_HUMAN	PPP1R7	sp|Q15435|PP1R7_HUMAN Protein phosphatase 1 regulatory subunit 7 OS=Homo sapiens OX=9606 GN=PPP1R7 PE=1 SV=1	1	4	4	4	14.4	41.564		13199	12952	15236			10542
sp|Q15582|BGH3_HUMAN	TGFBI	sp|Q15582|BGH3_HUMAN Transforming growth factor-beta-induced protein ig-h3 OS=Homo sapiens OX=9606 GN=TGFBI PE=1 SV=1	1	7	7	7	11.9	74.68		74788	25394	25635			70443
sp|Q15782|CH3L2_HUMAN	CHI3L2	sp|Q15782|CH3L2_HUMAN Chitinase-3-like protein 2 OS=Homo sapiens OX=9606 GN=CHI3L2 PE=1 SV=1	1	8	8	8	25.6	43.5		1092600	10111	9261.4			5329.2
sp|Q86VB7|C163A_HUMAN	CD163	sp|Q86VB7|C163A_HUMAN Scavenger receptor cysteine-rich type 1 protein M130 OS=Homo sapiens OX=9606 GN=CD163 PE=1 SV=2	1	4	4	4	4.3	125.45		41305	39929	44797			34578
sp|Q86VP6|CAND1_HUMAN	CAND1	sp|Q86VP6|CAND1_HUMAN Cullin-associated NEDD8-dissociated protein 1 OS=Homo sapiens OX=9606 GN=CAND1 PE=1 SV=2	1	6	6	6	6.6	136.37		46996	23162	28832			22201
sp|Q92530|PSMF1_HUMAN	PSMF1	sp|Q92530|PSMF1_HUMAN Proteasome inhibitor PI31 subunit OS=Homo sapiens OX=9606 GN=PSMF1 PE=1 SV=2	1	2	2	2	10	29.816		59467	16566				40918	26527
sp|Q96IU4|ABHEB_HUMAN	ABHD14B	sp|Q96IU4|ABHEB_HUMAN Protein ABHD14B OS=Homo sapiens OX=9606 GN=ABHD14B PE=1 SV=1	1	5	5	5	32.9	22.345		114550	72983				114240	56619
sp|Q99536|VAT1_HUMAN	VAT1	sp|Q99536|VAT1_HUMAN Synaptic vesicle membrane protein VAT-1 homolog OS=Homo sapiens OX=9606 GN=VAT1 PE=1 SV=2	1	5	5	5	18.8	41.92		68786	57538	52657			72867
sp|Q99584|S10AD_HUMAN	S100A13	sp|Q99584|S10AD_HUMAN Protein S100-A13 OS=Homo sapiens OX=9606 GN=S100A13 PE=1 SV=1	1	2	2	2	23.5	11.471		32213	34901	42900			86552
sp|Q9GZP4|PITH1_HUMAN	PITHD1	sp|Q9GZP4|PITH1_HUMAN PITH domain-containing protein 1 OS=Homo sapiens OX=9606 GN=PITHD1 PE=1 SV=1	1	4	4	4	27.5	24.178		42272	58525				34216	42722
sp|Q9UGM5|FETUB_HUMAN	FETUB	sp|Q9UGM5|FETUB_HUMAN Fetuin-B OS=Homo sapiens OX=9606 GN=FETUB PE=1 SV=2	1	4	4	4	13.4	42.054		60515		56362			136470	63262
sp|Q9Y5W5|WIF1_HUMAN	WIF1	sp|Q9Y5W5|WIF1_HUMAN Wnt inhibitory factor 1 OS=Homo sapiens OX=9606 GN=WIF1 PE=1 SV=3	1	8	8	8	27.2	41.527		511070	56463	96892		134740
sp|Q9Y696|CLIC4_HUMAN	CLIC4	sp|Q9Y696|CLIC4_HUMAN Chloride intracellular channel protein 4 OS=Homo sapiens OX=9606 GN=CLIC4 PE=1 SV=4	1	4	4	4	19.4	28.772			27144	25316			47648	22335
sp|O14498|ISLR_HUMAN	ISLR	sp|O14498|ISLR_HUMAN Immunoglobulin superfamily containing leucine-rich repeat protein OS=Homo sapiens OX=9606 GN=ISLR PE=2 SV=1	1	5	5	5	15	45.997		246640	51708	103350			68526	59631
sp|O15144|ARPC2_HUMAN	ARPC2	sp|O15144|ARPC2_HUMAN Actin-related protein 2/3 complex subunit 2 OS=Homo sapiens OX=9606 GN=ARPC2 PE=1 SV=1	1	4	4	4	15	34.333		28348	17155	32772			37521	21561
sp|O43175|SERA_HUMAN	PHGDH	sp|O43175|SERA_HUMAN D-3-phosphoglycerate dehydrogenase OS=Homo sapiens OX=9606 GN=PHGDH PE=1 SV=4	1	9	9	9	20.5	56.65		116860	28292	79196			49552	68350
sp|P00505|AATM_HUMAN	GOT2	sp|P00505|AATM_HUMAN Aspartate aminotransferase, mitochondrial OS=Homo sapiens OX=9606 GN=GOT2 PE=1 SV=3	1	3	3	3	7.9	47.517		20544	27558	30971			49042	25360
sp|P01033|TIMP1_HUMAN	TIMP1	sp|P01033|TIMP1_HUMAN Metalloproteinase inhibitor 1 OS=Homo sapiens OX=9606 GN=TIMP1 PE=1 SV=1	1	6	6	6	42	23.171		1759500	13103			43263	12276	21756
sp|P01619|KV320_HUMAN	IGKV3-20	sp|P01619|KV320_HUMAN Immunoglobulin kappa variable 3-20 OS=Homo sapiens OX=9606 GN=IGKV3-20 PE=1 SV=2	1	4	4	3	40.5	12.557		2295600	863080	605510			2625700	769520
sp|P02750|A2GL_HUMAN	LRG1	sp|P02750|A2GL_HUMAN Leucine-rich alpha-2-glycoprotein OS=Homo sapiens OX=9606 GN=LRG1 PE=1 SV=2	1	3	3	3	8.9	38.177		313950	768800	585540			396640	444510
sp|P04792|HSPB1_HUMAN	HSPB1	sp|P04792|HSPB1_HUMAN Heat shock protein beta-1 OS=Homo sapiens OX=9606 GN=HSPB1 PE=1 SV=2	1	5	5	5	30.2	22.782		247930	95713	283830			145790	353000
sp|P05154|IPSP_HUMAN	SERPINA5	sp|P05154|IPSP_HUMAN Plasma serine protease inhibitor OS=Homo sapiens OX=9606 GN=SERPINA5 PE=1 SV=3	1	10	10	10	26.6	45.674		3077400	66409	40658		107720	79113
sp|P05160|F13B_HUMAN	F13B	sp|P05160|F13B_HUMAN Coagulation factor XIII B chain OS=Homo sapiens OX=9606 GN=F13B PE=1 SV=3	1	4	4	4	8.8	75.51		51259	46931	28309			107930	75195
sp|P07237|PDIA1_HUMAN	P4HB	sp|P07237|PDIA1_HUMAN Protein disulfide-isomerase OS=Homo sapiens OX=9606 GN=P4HB PE=1 SV=3	1	7	7	7	12.6	57.116		48891	39091	44729			54532	49388
sp|P07384|CAN1_HUMAN	CAPN1	sp|P07384|CAN1_HUMAN Calpain-1 catalytic subunit OS=Homo sapiens OX=9606 GN=CAPN1 PE=1 SV=1	1	7	7	7	10.6	81.889		112290	78509	82853			138040	75305
sp|P08571|CD14_HUMAN	CD14	sp|P08571|CD14_HUMAN Monocyte differentiation antigen CD14 OS=Homo sapiens OX=9606 GN=CD14 PE=1 SV=2	1	4	4	4	17.1	40.076		160410	36511	35415			59099	40175
sp|P09104|ENOG_HUMAN	ENO2	sp|P09104|ENOG_HUMAN Gamma-enolase OS=Homo sapiens OX=9606 GN=ENO2 PE=1 SV=3	1	3	2	2	9.9	47.268		15488	23739	30721			19406	13611
sp|P11766|ADHX_HUMAN	ADH5	sp|P11766|ADHX_HUMAN Alcohol dehydrogenase class-3 OS=Homo sapiens OX=9606 GN=ADH5 PE=1 SV=4	1	8	8	8	27	39.724		114550	61610	152680			95464	65163
sp|P12277|KCRB_HUMAN	CKB	sp|P12277|KCRB_HUMAN Creatine kinase B-type OS=Homo sapiens OX=9606 GN=CKB PE=1 SV=1	1	6	6	6	17.3	42.644		209220	312030	145190			306150	162650
sp|P14174|MIF_HUMAN	MIF	sp|P14174|MIF_HUMAN Macrophage migration inhibitory factor OS=Homo sapiens OX=9606 GN=MIF PE=1 SV=4	1	2	2	2	17.4	12.476		264810	46243	60862			175780	91154
sp|P16152|CBR1_HUMAN	CBR1	sp|P16152|CBR1_HUMAN Carbonyl reductase [NADPH] 1 OS=Homo sapiens OX=9606 GN=CBR1 PE=1 SV=3	1	6	6	4	29.2	30.375		139390	68968	88236			102070	78745
sp|P17174|AATC_HUMAN	GOT1	sp|P17174|AATC_HUMAN Aspartate aminotransferase, cytoplasmic OS=Homo sapiens OX=9606 GN=GOT1 PE=1 SV=3	1	3	3	3	10.2	46.247		44532	63029	31190			66684	38050
sp|P21399|ACOC_HUMAN	ACO1	sp|P21399|ACOC_HUMAN Cytoplasmic aconitate hydratase OS=Homo sapiens OX=9606 GN=ACO1 PE=1 SV=3	1	5	5	5	7.6	98.398		51860	19769	27365			15295	10722
sp|P21980|TGM2_HUMAN	TGM2	sp|P21980|TGM2_HUMAN Protein-glutamine gamma-glutamyltransferase 2 OS=Homo sapiens OX=9606 GN=TGM2 PE=1 SV=2	1	10	10	10	20.2	77.328		128430	145790	42020			324460	38479
sp|P22792|CPN2_HUMAN	CPN2	sp|P22792|CPN2_HUMAN Carboxypeptidase N subunit 2 OS=Homo sapiens OX=9606 GN=CPN2 PE=1 SV=3	1	7	7	7	16.5	60.556		120010	236020	99999			189200	84350
sp|P23141|EST1_HUMAN;sp|Q9UKY3|CES1P_HUMAN	CES1	sp|P23141|EST1_HUMAN Liver carboxylesterase 1 OS=Homo sapiens OX=9606 GN=CES1 PE=1 SV=2	2	5	5	5	11.3	62.52		10701	13368	60228			15546	48216
sp|P23284|PPIB_HUMAN	PPIB	sp|P23284|PPIB_HUMAN Peptidyl-prolyl cis-trans isomerase B OS=Homo sapiens OX=9606 GN=PPIB PE=1 SV=2	1	3	3	3	15.3	23.742		66996	23533	35496			40518	17358
sp|P27824|CALX_HUMAN	CANX	sp|P27824|CALX_HUMAN Calnexin OS=Homo sapiens OX=9606 GN=CANX PE=1 SV=2	1	4	4	4	8.4	67.567		30071	29510	43907			30172	21119
sp|P28838|AMPL_HUMAN	LAP3	sp|P28838|AMPL_HUMAN Cytosol aminopeptidase OS=Homo sapiens OX=9606 GN=LAP3 PE=1 SV=3	1	10	10	10	26.2	56.166		72244	33162	231250			118730	42429
sp|P29622|KAIN_HUMAN	SERPINA4	sp|P29622|KAIN_HUMAN Kallistatin OS=Homo sapiens OX=9606 GN=SERPINA4 PE=1 SV=3	1	10	10	10	27.4	48.541		488010	213530	71502			557350	203590
sp|P35542|SAA4_HUMAN	SAA4	sp|P35542|SAA4_HUMAN Serum amyloid A-4 protein OS=Homo sapiens OX=9606 GN=SAA4 PE=1 SV=2	1	4	4	4	32.3	14.746		282790	1157500	204140			1381900	616390
sp|P35580|MYH10_HUMAN	MYH10	sp|P35580|MYH10_HUMAN Myosin-10 OS=Homo sapiens OX=9606 GN=MYH10 PE=1 SV=3	1	22	16	16	12.5	229		59929	27816	117690		47810	33309
sp|P43251|BTD_HUMAN	BTD	sp|P43251|BTD_HUMAN Biotinidase OS=Homo sapiens OX=9606 GN=BTD PE=1 SV=2	1	5	5	5	10.5	61.132		226760	87644	91072			121760	55728
sp|P45974|UBP5_HUMAN	USP5	sp|P45974|UBP5_HUMAN Ubiquitin carboxyl-terminal hydrolase 5 OS=Homo sapiens OX=9606 GN=USP5 PE=1 SV=2	1	7	7	7	11.7	95.785		49227	83338	41579			35401	24750
sp|P50895|BCAM_HUMAN	BCAM	sp|P50895|BCAM_HUMAN Basal cell adhesion molecule OS=Homo sapiens OX=9606 GN=BCAM PE=1 SV=2	1	5	5	5	10.5	67.404		19303	12715	48888			21536	27921
sp|P52209|6PGD_HUMAN	PGD	sp|P52209|6PGD_HUMAN 6-phosphogluconate dehydrogenase, decarboxylating OS=Homo sapiens OX=9606 GN=PGD PE=1 SV=3	1	7	7	7	22.2	53.139		136810	176450	64677			134250	48365
sp|P55058|PLTP_HUMAN	PLTP	sp|P55058|PLTP_HUMAN Phospholipid transfer protein OS=Homo sapiens OX=9606 GN=PLTP PE=1 SV=1	1	4	4	4	8.7	54.739		141660	44037	39578			99263	28892
sp|P68133|ACTS_HUMAN;sp|P68032|ACTC_HUMAN;sp|P62736|ACTA_HUMAN;sp|P63267|ACTH_HUMAN	ACTA1	sp|P68133|ACTS_HUMAN Actin, alpha skeletal muscle OS=Homo sapiens OX=9606 GN=ACTA1 PE=1 SV=1;sp|P68032|ACTC_HUMAN Actin, alpha cardiac muscle 1 OS=Homo sapiens OX=9606 GN=ACTC1 PE=1 SV=1;sp|P62736|ACTA_HUMAN Actin, aortic smooth muscle OS=Homo sapiens OX=9	4	12	3	3	35.8	42.051		210940	750560	408520			910050	539300
sp|P80108|PHLD_HUMAN	GPLD1	sp|P80108|PHLD_HUMAN Phosphatidylinositol-glycan-specific phospholipase D OS=Homo sapiens OX=9606 GN=GPLD1 PE=1 SV=3	1	8	8	8	11.8	92.335		74571	113980	44794			170370	81969
sp|Q06033|ITIH3_HUMAN;CON__Q0V8M9	ITIH3	sp|Q06033|ITIH3_HUMAN Inter-alpha-trypsin inhibitor heavy chain H3 OS=Homo sapiens OX=9606 GN=ITIH3 PE=1 SV=2	2	3	3	3	4.3	99.848		24960	141970	29681			118870	119300
sp|Q08431|MFGM_HUMAN	MFGE8	sp|Q08431|MFGM_HUMAN Lactadherin OS=Homo sapiens OX=9606 GN=MFGE8 PE=1 SV=3	1	8	8	8	24.5	43.104		150650	43251	60186			100260	59210
sp|Q12841|FSTL1_HUMAN	FSTL1	sp|Q12841|FSTL1_HUMAN Follistatin-related protein 1 OS=Homo sapiens OX=9606 GN=FSTL1 PE=1 SV=1	1	6	6	6	24.4	34.985		321820	26662	40836		21083	32971
sp|Q13822|ENPP2_HUMAN	ENPP2	sp|Q13822|ENPP2_HUMAN Ectonucleotide pyrophosphatase/phosphodiesterase family member 2 OS=Homo sapiens OX=9606 GN=ENPP2 PE=1 SV=3	1	20	20	20	29.4	98.993		2022900	114090	248280		381600	38116
sp|Q14195|DPYL3_HUMAN	DPYSL3	sp|Q14195|DPYL3_HUMAN Dihydropyrimidinase-related protein 3 OS=Homo sapiens OX=9606 GN=DPYSL3 PE=1 SV=1	1	10	9	9	25.1	61.963		140720	21408	118140			137040	15200
sp|Q15181|IPYR_HUMAN	PPA1	sp|Q15181|IPYR_HUMAN Inorganic pyrophosphatase OS=Homo sapiens OX=9606 GN=PPA1 PE=1 SV=2	1	3	3	3	14.9	32.66		48458	22541	25580			27908	23114
sp|Q6EMK4|VASN_HUMAN	VASN	sp|Q6EMK4|VASN_HUMAN Vasorin OS=Homo sapiens OX=9606 GN=VASN PE=1 SV=1	1	4	4	4	7.3	71.712		30742	36944	57169			64416	35005
sp|Q8N436|CPXM2_HUMAN;sp|Q8IUX7|AEBP1_HUMAN	CPXM2	sp|Q8N436|CPXM2_HUMAN Inactive carboxypeptidase-like protein X2 OS=Homo sapiens OX=9606 GN=CPXM2 PE=2 SV=3	2	15	15	15	24.6	85.869		810390	4007.9	4003.6		12976	10490
sp|Q8WUM4|PDC6I_HUMAN	PDCD6IP	sp|Q8WUM4|PDC6I_HUMAN Programmed cell death 6-interacting protein OS=Homo sapiens OX=9606 GN=PDCD6IP PE=1 SV=1	1	13	13	13	18.7	96.022		190220	17013	30758			36771	13636
sp|Q96DG6|CMBL_HUMAN	CMBL	sp|Q96DG6|CMBL_HUMAN Carboxymethylenebutenolidase homolog OS=Homo sapiens OX=9606 GN=CMBL PE=1 SV=1	1	4	4	4	18	28.048		25273	15929	16625			18099	22863
sp|Q96IY4|CBPB2_HUMAN	CPB2	sp|Q96IY4|CBPB2_HUMAN Carboxypeptidase B2 OS=Homo sapiens OX=9606 GN=CPB2 PE=1 SV=2	1	3	3	3	8.5	48.424		25805	66248	39961			158710	68203
sp|Q96KN2|CNDP1_HUMAN	CNDP1	sp|Q96KN2|CNDP1_HUMAN Beta-Ala-His dipeptidase OS=Homo sapiens OX=9606 GN=CNDP1 PE=1 SV=4	1	7	7	7	17	56.705		50918	87838	35837			130150	60999
sp|Q9NRX4|PHP14_HUMAN	PHPT1	sp|Q9NRX4|PHP14_HUMAN 14 kDa phosphohistidine phosphatase OS=Homo sapiens OX=9606 GN=PHPT1 PE=1 SV=1	1	3	3	3	35.2	13.832		64188	66217	67427			51600	64185
sp|Q9NY33|DPP3_HUMAN	DPP3	sp|Q9NY33|DPP3_HUMAN Dipeptidyl peptidase 3 OS=Homo sapiens OX=9606 GN=DPP3 PE=1 SV=2	1	4	4	4	8.5	82.588		40698	49335	34061			42648	28436
sp|O95967|FBLN4_HUMAN	EFEMP2	sp|O95967|FBLN4_HUMAN EGF-containing fibulin-like extracellular matrix protein 2 OS=Homo sapiens OX=9606 GN=EFEMP2 PE=1 SV=3	1	6	6	6	16.5	49.405		191580	14620	22680		26363	11727	17870
sp|Q92563|TICN2_HUMAN	SPOCK2	sp|Q92563|TICN2_HUMAN Testican-2 OS=Homo sapiens OX=9606 GN=SPOCK2 PE=1 SV=1	1	10	10	10	22.6	46.779	35622	659590	19808	111700			25534	12149
sp|P00748|FA12_HUMAN	F12	sp|P00748|FA12_HUMAN Coagulation factor XII OS=Homo sapiens OX=9606 GN=F12 PE=1 SV=3	1	5	5	5	11.9	67.791		132270	77944	41176		103790	101320	163470
sp|P12429|ANXA3_HUMAN	ANXA3	sp|P12429|ANXA3_HUMAN Annexin A3 OS=Homo sapiens OX=9606 GN=ANXA3 PE=1 SV=3	1	5	5	5	17.6	36.375		54643	40116	86851		86103	77826	70192
sp|P15144|AMPN_HUMAN	ANPEP	sp|P15144|AMPN_HUMAN Aminopeptidase N OS=Homo sapiens OX=9606 GN=ANPEP PE=1 SV=4	1	8	8	8	9.1	109.54		154880	53169	37854		26176	82490	37045
sp|P31948|STIP1_HUMAN	STIP1	sp|P31948|STIP1_HUMAN Stress-induced-phosphoprotein 1 OS=Homo sapiens OX=9606 GN=STIP1 PE=1 SV=1	1	8	8	8	19	62.639	38586	143180	13969	37850	45852		44799	31435
sp|P16035|TIMP2_HUMAN	TIMP2	sp|P16035|TIMP2_HUMAN Metalloproteinase inhibitor 2 OS=Homo sapiens OX=9606 GN=TIMP2 PE=1 SV=2	1	3	3	3	10.5	24.399	45522	538380	12202	25129		127250	11324	7067.9
sp|O95747|OXSR1_HUMAN	OXSR1	sp|O95747|OXSR1_HUMAN Serine/threonine-protein kinase OSR1 OS=Homo sapiens OX=9606 GN=OXSR1 PE=1 SV=1	1	3	3	3	7.4	58.022		32075	9804.5	46141	69585	35424	25265	23617
sp|Q5TDH0|DDI2_HUMAN;sp|Q8WTU0|DDI1_HUMAN	DDI2	sp|Q5TDH0|DDI2_HUMAN Protein DDI1 homolog 2 OS=Homo sapiens OX=9606 GN=DDI2 PE=1 SV=1	2	6	6	6	22.3	44.522		70329	67132	85268	43243	51640	54783	20226
sp|P30046|DOPD_HUMAN;sp|A6NHG4|DDTL_HUMAN	DDT	sp|P30046|DOPD_HUMAN D-dopachrome decarboxylase OS=Homo sapiens OX=9606 GN=DDT PE=1 SV=3;sp|A6NHG4|DDTL_HUMAN D-dopachrome decarboxylase-like protein OS=Homo sapiens OX=9606 GN=DDTL PE=2 SV=1	2	4	4	4	37.3	12.712	115120	175620	134000	119400		104940	293840	180110
sp|P00325|ADH1B_HUMAN;sp|P07327|ADH1A_HUMAN;sp|P00326|ADH1G_HUMAN	ADH1B	sp|P00325|ADH1B_HUMAN All-trans-retinol dehydrogenase [NAD(+)] ADH1B OS=Homo sapiens OX=9606 GN=ADH1B PE=1 SV=2;sp|P07327|ADH1A_HUMAN Alcohol dehydrogenase 1A OS=Homo sapiens OX=9606 GN=ADH1A PE=1 SV=2;sp|P00326|ADH1G_HUMAN Alcohol dehydrogenase 1C OS=Homo	3	5	5	5	14.7	39.854	444110	167460	232460	131630		265524	557680	210500
sp|P24821|TENA_HUMAN	TNC	sp|P24821|TENA_HUMAN Tenascin OS=Homo sapiens OX=9606 GN=TNC PE=1 SV=3	1	46	46	46	32	240.85	64281		22266	76394	7028.5	2487200	11698	16922
sp|P16070|CD44_HUMAN	CD44	sp|P16070|CD44_HUMAN CD44 antigen OS=Homo sapiens OX=9606 GN=CD44 PE=1 SV=3	1	5	5	5	7.4	81.537	44110	49328	45343	33052	31630	52264	73057	35883
sp|P29144|TPP2_HUMAN	TPP2	sp|P29144|TPP2_HUMAN Tripeptidyl-peptidase 2 OS=Homo sapiens OX=9606 GN=TPP2 PE=1 SV=4	1	2	2	2	2	138.35										15367	12821	17964
sp|O60282|KIF5C_HUMAN;sp|P33176|KINH_HUMAN;sp|Q12840|KIF5A_HUMAN	KIF5C	sp|O60282|KIF5C_HUMAN Kinesin heavy chain isoform 5C OS=Homo sapiens OX=9606 GN=KIF5C PE=1 SV=1;sp|P33176|KINH_HUMAN Kinesin-1 heavy chain OS=Homo sapiens OX=9606 GN=KIF5B PE=1 SV=1;sp|Q12840|KIF5A_HUMAN Kinesin heavy chain isoform 5A OS=Homo sapiens OX=96	3	2	2	2	2.1	109.49											966650	890110	1117600
sp|P24592|IBP6_HUMAN	IGFBP6	sp|P24592|IBP6_HUMAN Insulin-like growth factor-binding protein 6 OS=Homo sapiens OX=9606 GN=IGFBP6 PE=1 SV=1	1	3	3	3	15.8	25.322									553560			18288	33078
sp|P27816|MAP4_HUMAN	MAP4	sp|P27816|MAP4_HUMAN Microtubule-associated protein 4 OS=Homo sapiens OX=9606 GN=MAP4 PE=1 SV=3	1	3	3	3	3.9	121											27356	50544	35776
sp|P05062|ALDOB_HUMAN	ALDOB	sp|P05062|ALDOB_HUMAN Fructose-bisphosphate aldolase B OS=Homo sapiens OX=9606 GN=ALDOB PE=1 SV=2	1	4	4	4	14.3	39.473											13821	5061.2	377610
sp|P09496|CLCA_HUMAN	CLTA	sp|P09496|CLCA_HUMAN Clathrin light chain A OS=Homo sapiens OX=9606 GN=CLTA PE=1 SV=1	1	2	2	2	6.9	27.076										16497	28053	66668	29237
sp|O00233|PSMD9_HUMAN	PSMD9	sp|O00233|PSMD9_HUMAN 26S proteasome non-ATPase regulatory subunit 9 OS=Homo sapiens OX=9606 GN=PSMD9 PE=1 SV=3	1	5	5	5	26.9	24.682										49912	52677	53877
sp|O15143|ARC1B_HUMAN	ARPC1B	sp|O15143|ARC1B_HUMAN Actin-related protein 2/3 complex subunit 1B OS=Homo sapiens OX=9606 GN=ARPC1B PE=1 SV=3	1	3	3	3	13.2	40.949										16640	18272	37621
sp|Q13404|UB2V1_HUMAN;sp|Q15819|UB2V2_HUMAN	UBE2V1	sp|Q13404|UB2V1_HUMAN Ubiquitin-conjugating enzyme E2 variant 1 OS=Homo sapiens OX=9606 GN=UBE2V1 PE=1 SV=2;sp|Q15819|UB2V2_HUMAN Ubiquitin-conjugating enzyme E2 variant 2 OS=Homo sapiens OX=9606 GN=UBE2V2 PE=1 SV=4	2	2	2	2	12.9	16.495										114000	84942	168840
sp|Q96FQ6|S10AG_HUMAN	S100A16	sp|Q96FQ6|S10AG_HUMAN Protein S100-A16 OS=Homo sapiens OX=9606 GN=S100A16 PE=1 SV=1	1	1	1	1	11.7	11.801										11473	8076		46370
sp|Q99733|NP1L4_HUMAN;sp|P55209|NP1L1_HUMAN	NAP1L4	sp|Q99733|NP1L4_HUMAN Nucleosome assembly protein 1-like 4 OS=Homo sapiens OX=9606 GN=NAP1L4 PE=1 SV=1	2	5	5	5	14.9	42.823											40745	118890	23640
sp|P49189|AL9A1_HUMAN	ALDH9A1	sp|P49189|AL9A1_HUMAN 4-trimethylaminobutyraldehyde dehydrogenase OS=Homo sapiens OX=9606 GN=ALDH9A1 PE=1 SV=3	1	6	6	6	14.4	53.801										58074	40469	140390	69585
sp|P61626|LYSC_HUMAN	LYZ	sp|P61626|LYSC_HUMAN Lysozyme C OS=Homo sapiens OX=9606 GN=LYZ PE=1 SV=1	1	3	3	3	32.4	16.537										85565	57432	56447	53457
